# Supplementary material for: SARS-CoV-2 NSP-12 mutations survey during the pandemic in the world
Source: Research Square preprint supplement (doi:10.21203/rs.3.rs-877078/v1), 2021-09-22
Supplement: Supplementary file 1 [file 116fa1de9eb03b830e85b793.xlsx]

## Sheet: Sheet1
	Frequency	Concatinate	Leucine	Serine	Isoleucine	Valine	Glycine	Phenylalanine	Tyrosine	Aspartice acid	Aspargine	Histidine	Cystetine	Argenine	Threonine	Alanine	Methionine	Glutamic acid	Lysine	Glutamine	Proline	Tryptophan
P(323)	0.9862442126804893	L:0.978656745289244 , I:1.4462649304256176e-05 , V:1.807831163032022e-06 , S:1.807831163032022e-06 , F:0.0059531880198644485 , H:0.0016125853974245637 , R:1.807831163032022e-06 , M:1.807831163032022e-06	0.978656745289244	1.4462649304256176e-05	1.807831163032022e-06	1.807831163032022e-06	0.0059531880198644485	0.0	0.0	0.0	0.0016125853974245637	0.0	0.0	0.0	0.0	1.807831163032022e-06	1.807831163032022e-06	0.0	0.0	0.0	0.0	0.0
P(227)	0.12927619863725687	L:0.12894355770325897 , I:1.807831163032022e-06 , S:0.0003019078042263477 , T:1.807831163032022e-05 , A:5.4234934890960665e-06 , Q:5.4234934890960665e-06	0.12894355770325897	1.807831163032022e-06	0.0	0.0003019078042263477	0.0	0.0	0.0	0.0	0.0	1.807831163032022e-05	5.4234934890960665e-06	0.0	0.0	0.0	0.0	0.0	0.0	5.4234934890960665e-06	0.0	0.0
V(776)	0.0085474257388154	L:0.0085474257388154	0.0085474257388154	0.0	0.0	0.0	0.0	0.0	0.0	0.0	0.0	0.0	0.0	0.0	0.0	0.0	0.0	0.0	0.0	0.0	0.0	0.0
G(671)	0.008034001688514307	V:0.0020066925909655448 , S:0.0059278783835820005 , C:5.965842838005673e-05 , A:3.25409609345764e-05 , D:7.231324652128088e-06	0.0	0.0	0.0020066925909655448	0.0059278783835820005	0.0	5.965842838005673e-05	0.0	0.0	0.0	0.0	3.25409609345764e-05	0.0	7.231324652128088e-06	0.0	0.0	0.0	0.0	0.0	0.0	0.0
A(97)	0.004409300206635102	V:0.004369527921048397 , S:1.2654818141224155e-05 , T:2.530963628244831e-05 , P:1.807831163032022e-06	0.0	0.0	0.004369527921048397	1.2654818141224155e-05	0.0	0.0	0.0	0.0	0.0	2.530963628244831e-05	0.0	0.0	0.0	0.0	0.0	0.0	0.0	0.0	1.807831163032022e-06	0.0
A(185)	0.004280944194059828	V:0.0020301943960849608 , S:0.0022326714863445474 , Y:1.807831163032022e-06 , T:1.62704804672882e-05	0.0	0.0	0.0020301943960849608	0.0022326714863445474	0.0	0.0	1.807831163032022e-06	0.0	0.0	1.62704804672882e-05	0.0	0.0	0.0	0.0	0.0	0.0	0.0	0.0	0.0	0.0
M(666)	0.003932032779594648	L:2.3501805119416287e-05 , I:0.003628317144205268 , V:3.073312977154437e-05 , T:0.00024948070049841904	2.3501805119416287e-05	0.003628317144205268	3.073312977154437e-05	0.0	0.0	0.0	0.0	0.0	0.0	0.00024948070049841904	0.0	0.0	0.0	0.0	0.0	0.0	0.0	0.0	0.0	0.0
S(6)	0.0035343099237276033	L:0.0034836906511627064 , F:3.615662326064044e-06 , P:4.700361023883257e-05	0.0034836906511627064	0.0	0.0	0.0	3.615662326064044e-06	0.0	0.0	0.0	0.0	0.0	0.0	0.0	0.0	0.0	0.0	0.0	0.0	0.0	4.700361023883257e-05	0.0
V(605)	0.003172743691121199	L:1.807831163032022e-05 , I:0.003118508756230238 , F:3.615662326064044e-06 , A:3.25409609345764e-05	1.807831163032022e-05	0.003118508756230238	0.0	0.0	3.615662326064044e-06	0.0	0.0	0.0	0.0	0.0	3.25409609345764e-05	0.0	0.0	0.0	0.0	0.0	0.0	0.0	0.0	0.0
G(179)	0.0028111774585147945	V:1.807831163032022e-06 , S:1.0846986978192133e-05 , C:0.00279852264037357	0.0	0.0	1.807831163032022e-06	1.0846986978192133e-05	0.0	0.00279852264037357	0.0	0.0	0.0	0.0	0.0	0.0	0.0	0.0	0.0	0.0	0.0	0.0	0.0	0.0
A(443)	0.002536387121733927	V:0.0006200860889199836 , S:0.0019126853704878794 , T:3.615662326064044e-06	0.0	0.0	0.0006200860889199836	0.0019126853704878794	0.0	0.0	0.0	0.0	0.0	3.615662326064044e-06	0.0	0.0	0.0	0.0	0.0	0.0	0.0	0.0	0.0	0.0
A(529)	0.002373682317061045	V:0.002207361850062099 , S:7.231324652128088e-05 , T:9.400722047766515e-05	0.0	0.0	0.002207361850062099	7.231324652128088e-05	0.0	0.0	0.0	0.0	0.0	9.400722047766515e-05	0.0	0.0	0.0	0.0	0.0	0.0	0.0	0.0	0.0	0.0
M(601)	0.0022399028109966754	I:0.002209169681225131 , V:3.615662326064044e-06 , T:1.0846986978192133e-05 , K:1.62704804672882e-05	0.0	0.002209169681225131	3.615662326064044e-06	0.0	0.0	0.0	0.0	0.0	0.0	1.0846986978192133e-05	0.0	0.0	0.0	0.0	0.0	0.0	1.62704804672882e-05	0.0	0.0	0.0
L(638)	0.0021748208891275225	F:0.0021748208891275225	0.0	0.0	0.0	0.0	0.0021748208891275225	0.0	0.0	0.0	0.0	0.0	0.0	0.0	0.0	0.0	0.0	0.0	0.0	0.0	0.0	0.0
G(823)	0.002135048603540818	V:0.0002205554018899067 , S:7.412107768431291e-05 , C:0.0015908914234681795 , Y:1.807831163032022e-05 , D:0.00023140238886809882	0.0	0.0	0.0002205554018899067	7.412107768431291e-05	0.0	0.0015908914234681795	1.807831163032022e-05	0.0	0.0	0.0	0.0	0.0	0.00023140238886809882	0.0	0.0	0.0	0.0	0.0	0.0	0.0
P(112)	0.0019343793444442637	L:1.807831163032022e-06 , S:0.0018530269421078228 , T:7.773674001037695e-05 , R:1.807831163032022e-06	1.807831163032022e-06	0.0	0.0	0.0018530269421078228	0.0	0.0	0.0	0.0	0.0	7.773674001037695e-05	0.0	0.0	0.0	1.807831163032022e-06	0.0	0.0	0.0	0.0	0.0	0.0
A(16)	0.0019253401886291037	V:0.0019163010328139434 , S:3.615662326064044e-06 , E:5.4234934890960665e-06	0.0	0.0	0.0019163010328139434	3.615662326064044e-06	0.0	0.0	0.0	0.0	0.0	0.0	0.0	0.0	0.0	0.0	0.0	5.4234934890960665e-06	0.0	0.0	0.0	0.0
R(173)	0.0017282865918586132	L:1.807831163032022e-06 , S:5.061927256489662e-05 , C:0.0015818522676530195 , H:9.400722047766515e-05	1.807831163032022e-06	0.0	0.0	5.061927256489662e-05	0.0	0.0015818522676530195	0.0	0.0	9.400722047766515e-05	0.0	0.0	0.0	0.0	0.0	0.0	0.0	0.0	0.0	0.0	0.0
T(739)	0.0016776673192937166	I:0.0016523576830112681 , A:2.1693973956384266e-05 , K:3.615662326064044e-06	0.0	0.0016523576830112681	0.0	0.0	0.0	0.0	0.0	0.0	0.0	0.0	2.1693973956384266e-05	0.0	0.0	0.0	0.0	0.0	3.615662326064044e-06	0.0	0.0	0.0
Q(822)	0.0015782366053269552	L:1.807831163032022e-06 , H:0.00146615107321897 , R:9.943071396676122e-05 , E:5.4234934890960665e-06 , K:5.4234934890960665e-06	1.807831163032022e-06	0.0	0.0	0.0	0.0	0.0	0.0	0.0	0.00146615107321897	0.0	0.0	0.0	0.0	9.943071396676122e-05	0.0	5.4234934890960665e-06	5.4234934890960665e-06	0.0	0.0	0.0
M(463)	0.001545695644392379	I:0.001471574566708066 , V:7.412107768431291e-05	0.0	0.001471574566708066	7.412107768431291e-05	0.0	0.0	0.0	0.0	0.0	0.0	0.0	0.0	0.0	0.0	0.0	0.0	0.0	0.0	0.0	0.0	0.0
T(26)	0.0014788058913601941	I:0.00146615107321897 , N:1.0846986978192133e-05 , A:1.807831163032022e-06	0.0	0.00146615107321897	0.0	0.0	0.0	0.0	0.0	1.0846986978192133e-05	0.0	0.0	1.807831163032022e-06	0.0	0.0	0.0	0.0	0.0	0.0	0.0	0.0	0.0
I(307)	0.0014751902290341301	L:3.615662326064044e-06 , V:0.0014064926448389132 , S:3.615662326064044e-06 , F:1.807831163032022e-06 , T:5.7850597217024705e-05 , M:1.807831163032022e-06	3.615662326064044e-06	0.0	0.0014064926448389132	3.615662326064044e-06	1.807831163032022e-06	0.0	0.0	0.0	0.0	5.7850597217024705e-05	0.0	0.0	0.0	0.0	1.807831163032022e-06	0.0	0.0	0.0	0.0	0.0
A(449)	0.0014733823978710981	V:0.0014462649304256177 , S:1.0846986978192133e-05 , T:1.62704804672882e-05	0.0	0.0	0.0014462649304256177	1.0846986978192133e-05	0.0	0.0	0.0	0.0	0.0	1.62704804672882e-05	0.0	0.0	0.0	0.0	0.0	0.0	0.0	0.0	0.0	0.0
T(293)	0.0014462649304256177	I:0.0014101083071649772 , A:1.2654818141224155e-05 , K:1.807831163032022e-06 , P:2.1693973956384266e-05	0.0	0.0014101083071649772	0.0	0.0	0.0	0.0	0.0	0.0	0.0	0.0	1.2654818141224155e-05	0.0	0.0	0.0	0.0	0.0	1.807831163032022e-06	0.0	2.1693973956384266e-05	0.0
K(91)	0.0013540655411109846	N:1.4462649304256176e-05 , T:1.62704804672882e-05 , R:0.0011479727885253341 , M:1.807831163032022e-06 , E:0.00017355179165107413	0.0	0.0	0.0	0.0	0.0	0.0	0.0	1.4462649304256176e-05	0.0	1.62704804672882e-05	0.0	0.0	0.0	0.0011479727885253341	1.807831163032022e-06	0.00017355179165107413	0.0	0.0	0.0	0.0
V(257)	0.0013161010866873121	I:8.858372698856908e-05 , F:0.0003742210507476286 , A:0.0008532963089511144	0.0	8.858372698856908e-05	0.0	0.0	0.0003742210507476286	0.0	0.0	0.0	0.0	0.0	0.0008532963089511144	0.0	0.0	0.0	0.0	0.0	0.0	0.0	0.0	0.0
T(141)	0.0013161010866873121	I:0.0012871757880787997 , A:2.8925298608512352e-05	0.0	0.0012871757880787997	0.0	0.0	0.0	0.0	0.0	0.0	0.0	0.0	2.8925298608512352e-05	0.0	0.0	0.0	0.0	0.0	0.0	0.0	0.0	0.0
T(806)	0.001294407112730928	I:0.0012148625415575188 , S:1.807831163032022e-05 , N:1.0846986978192133e-05 , A:5.061927256489662e-05	0.0	0.0012148625415575188	0.0	1.807831163032022e-05	0.0	0.0	0.0	1.0846986978192133e-05	0.0	0.0	5.061927256489662e-05	0.0	0.0	0.0	0.0	0.0	0.0	0.0	0.0	0.0
K(478)	0.0012781366322636397	N:0.0012474035024920953 , R:5.4234934890960665e-06 , M:2.530963628244831e-05	0.0	0.0	0.0	0.0	0.0	0.0	0.0	0.0012474035024920953	0.0	0.0	0.0	0.0	0.0	5.4234934890960665e-06	2.530963628244831e-05	0.0	0.0	0.0	0.0	0.0
V(354)	0.0012636739829593835	L:0.0012564426583072555 , I:1.807831163032022e-06 , A:5.4234934890960665e-06	0.0012564426583072555	1.807831163032022e-06	0.0	0.0	0.0	0.0	0.0	0.0	0.0	0.0	5.4234934890960665e-06	0.0	0.0	0.0	0.0	0.0	0.0	0.0	0.0	0.0
A(526)	0.0012492113336551273	L:0.0004013385181931089 , V:0.0006688975303218482 , S:0.000162704804672882 , T:1.807831163032022e-06 , E:1.4462649304256176e-05	0.0004013385181931089	0.0	0.0006688975303218482	0.000162704804672882	0.0	0.0	0.0	0.0	0.0	1.807831163032022e-06	0.0	0.0	0.0	0.0	0.0	1.4462649304256176e-05	0.0	0.0	0.0	0.0
E(744)	0.0012148625415575188	V:1.2654818141224155e-05 , A:1.807831163032022e-05 , G:1.4462649304256176e-05 , D:0.0011696667624817184	0.0	0.0	1.2654818141224155e-05	0.0	0.0	0.0	0.0	0.0	0.0	0.0	1.807831163032022e-05	1.4462649304256176e-05	0.0011696667624817184	0.0	0.0	0.0	0.0	0.0	0.0	0.0
A(311)	0.0010955456847974055	V:9.03915581516011e-06 , S:0.0009653818410590998 , T:0.00012112468792314548	0.0	0.0	9.03915581516011e-06	0.0009653818410590998	0.0	0.0	0.0	0.0	0.0	0.00012112468792314548	0.0	0.0	0.0	0.0	0.0	0.0	0.0	0.0	0.0	0.0
G(108)	0.0010485420745585728	V:0.00017716745397713816 , S:0.0005061927256489662 , C:0.00031637045353060387 , A:2.530963628244831e-05 , D:2.1693973956384266e-05 , R:1.807831163032022e-06	0.0	0.0	0.00017716745397713816	0.0005061927256489662	0.0	0.00031637045353060387	0.0	0.0	0.0	0.0	2.530963628244831e-05	0.0	2.1693973956384266e-05	1.807831163032022e-06	0.0	0.0	0.0	0.0	0.0	0.0
T(85)	0.0010105776201349004	I:0.0009979228019936762 , S:3.615662326064044e-06 , A:9.03915581516011e-06	0.0	0.0009979228019936762	0.0	3.615662326064044e-06	0.0	0.0	0.0	0.0	0.0	0.0	9.03915581516011e-06	0.0	0.0	0.0	0.0	0.0	0.0	0.0	0.0	0.0
S(913)	0.0010015384643197402	L:0.000981652321526388 , T:1.807831163032022e-05 , A:1.807831163032022e-06	0.000981652321526388	0.0	0.0	0.0	0.0	0.0	0.0	0.0	0.0	1.807831163032022e-05	1.807831163032022e-06	0.0	0.0	0.0	0.0	0.0	0.0	0.0	0.0	0.0
P(94)	0.0009527270229178756	L:0.000654434881017592 , S:0.00026755901212873926 , T:7.231324652128088e-06 , A:1.807831163032022e-06 , Q:2.1693973956384266e-05	0.000654434881017592	0.0	0.0	0.00026755901212873926	0.0	0.0	0.0	0.0	0.0	7.231324652128088e-06	1.807831163032022e-06	0.0	0.0	0.0	0.0	0.0	0.0	2.1693973956384266e-05	0.0	0.0
L(614)	0.0009256095554723953	I:2.8925298608512352e-05 , F:0.0008966842568638829	0.0	2.8925298608512352e-05	0.0	0.0	0.0008966842568638829	0.0	0.0	0.0	0.0	0.0	0.0	0.0	0.0	0.0	0.0	0.0	0.0	0.0	0.0	0.0
D(879)	0.0009165703996572352	V:2.530963628244831e-05 , Y:0.00046280477773619764 , N:1.2654818141224155e-05 , H:1.807831163032022e-06 , A:1.0846986978192133e-05 , G:0.0004031463493561409	0.0	0.0	2.530963628244831e-05	0.0	0.0	0.0	0.00046280477773619764	1.2654818141224155e-05	1.807831163032022e-06	0.0	1.0846986978192133e-05	0.0004031463493561409	0.0	0.0	0.0	0.0	0.0	0.0	0.0	0.0
M(196)	0.0009165703996572352	L:6.146625954308875e-05 , I:0.0008388336596468583 , V:1.62704804672882e-05	6.146625954308875e-05	0.0008388336596468583	1.62704804672882e-05	0.0	0.0	0.0	0.0	0.0	0.0	0.0	0.0	0.0	0.0	0.0	0.0	0.0	0.0	0.0	0.0	0.0
A(95)	0.0009129547373311712	V:0.00032902527167182803 , S:0.0005766981410072151 , T:7.231324652128088e-06	0.0	0.0	0.00032902527167182803	0.0005766981410072151	0.0	0.0	0.0	0.0	0.0	7.231324652128088e-06	0.0	0.0	0.0	0.0	0.0	0.0	0.0	0.0	0.0	0.0
V(174)	0.0009093390750051072	I:0.000903915581516011 , A:5.4234934890960665e-06	0.0	0.000903915581516011	0.0	0.0	0.0	0.0	0.0	0.0	0.0	0.0	5.4234934890960665e-06	0.0	0.0	0.0	0.0	0.0	0.0	0.0	0.0	0.0
H(613)	0.0008858372698856908	Y:0.0007972535428971217 , R:3.615662326064044e-06 , Q:8.496806466250504e-05	0.0	0.0	0.0	0.0	0.0	0.0	0.0007972535428971217	0.0	0.0	0.0	0.0	0.0	0.0	3.615662326064044e-06	0.0	0.0	0.0	8.496806466250504e-05	0.0	0.0
D(62)	0.0008695667894184026	Y:0.0003416800898130522 , A:1.62704804672882e-05 , G:0.0005116162191380623	0.0	0.0	0.0	0.0	0.0	0.0	0.0003416800898130522	0.0	0.0	0.0	1.62704804672882e-05	0.0005116162191380623	0.0	0.0	0.0	0.0	0.0	0.0	0.0	0.0
S(647)	0.0008695667894184026	I:0.0006996306600933925 , N:5.242710372792864e-05 , T:5.4234934890960665e-06 , G:3.25409609345764e-05 , R:7.954457117340897e-05	0.0	0.0006996306600933925	0.0	0.0	0.0	0.0	0.0	5.242710372792864e-05	0.0	5.4234934890960665e-06	0.0	3.25409609345764e-05	0.0	7.954457117340897e-05	0.0	0.0	0.0	0.0	0.0	0.0
T(248)	0.0008677589582553706	I:0.0008587198024402105 , S:5.4234934890960665e-06 , A:3.615662326064044e-06	0.0	0.0008587198024402105	0.0	5.4234934890960665e-06	0.0	0.0	0.0	0.0	0.0	0.0	3.615662326064044e-06	0.0	0.0	0.0	0.0	0.0	0.0	0.0	0.0	0.0
K(59)	0.0008587198024402105	N:0.0007538655949843532 , T:1.807831163032022e-06 , R:7.773674001037695e-05 , E:2.530963628244831e-05	0.0	0.0	0.0	0.0	0.0	0.0	0.0	0.0007538655949843532	0.0	1.807831163032022e-06	0.0	0.0	0.0	7.773674001037695e-05	0.0	2.530963628244831e-05	0.0	0.0	0.0	0.0
M(629)	0.0008297945038316982	L:7.231324652128088e-06 , I:0.0005857372968223752 , V:1.2654818141224155e-05 , T:0.00022417106421597074	7.231324652128088e-06	0.0005857372968223752	1.2654818141224155e-05	0.0	0.0	0.0	0.0	0.0	0.0	0.00022417106421597074	0.0	0.0	0.0	0.0	0.0	0.0	0.0	0.0	0.0	0.0
T(226)	0.0008279866726686662	I:1.807831163032022e-06 , A:7.231324652128088e-05 , M:0.0007502499326582892 , K:1.807831163032022e-06 , P:1.807831163032022e-06	0.0	1.807831163032022e-06	0.0	0.0	0.0	0.0	0.0	0.0	0.0	0.0	7.231324652128088e-05	0.0	0.0	0.0	0.0007502499326582892	0.0	1.807831163032022e-06	0.0	1.807831163032022e-06	0.0
K(718)	0.0008243710103426021	N:0.000730363789864937 , T:5.4234934890960665e-06 , R:7.954457117340897e-05 , M:7.231324652128088e-06 , E:1.807831163032022e-06	0.0	0.0	0.0	0.0	0.0	0.0	0.0	0.000730363789864937	0.0	5.4234934890960665e-06	0.0	0.0	0.0	7.954457117340897e-05	7.231324652128088e-06	1.807831163032022e-06	0.0	0.0	0.0	0.0
M(124)	0.00081352402336441	L:2.8925298608512352e-05 , I:0.0007629047507995133 , V:2.1693973956384266e-05	2.8925298608512352e-05	0.0007629047507995133	2.1693973956384266e-05	0.0	0.0	0.0	0.0	0.0	0.0	0.0	0.0	0.0	0.0	0.0	0.0	0.0	0.0	0.0	0.0	0.0
V(96)	0.0007972535428971217	L:1.807831163032022e-06 , I:0.0007683282442886094 , S:5.4234934890960665e-06 , F:1.807831163032022e-06 , A:1.807831163032022e-05 , G:1.807831163032022e-06	1.807831163032022e-06	0.0007683282442886094	0.0	5.4234934890960665e-06	1.807831163032022e-06	0.0	0.0	0.0	0.0	0.0	1.807831163032022e-05	1.807831163032022e-06	0.0	0.0	0.0	0.0	0.0	0.0	0.0	0.0
M(110)	0.0007375951145170651	L:0.0002946764795742196 , I:4.519577907580055e-05 , V:0.0003760288819106606 , T:1.807831163032022e-06 , R:1.62704804672882e-05 , K:3.615662326064044e-06	0.0002946764795742196	4.519577907580055e-05	0.0003760288819106606	0.0	0.0	0.0	0.0	0.0	0.0	1.807831163032022e-06	0.0	0.0	0.0	1.62704804672882e-05	0.0	0.0	3.615662326064044e-06	0.0	0.0	0.0
M(633)	0.0007068619847455206	I:5.965842838005673e-05 , V:4.338794791276853e-05 , T:0.0006020077772896634 , K:1.807831163032022e-06	0.0	5.965842838005673e-05	4.338794791276853e-05	0.0	0.0	0.0	0.0	0.0	0.0	0.0006020077772896634	0.0	0.0	0.0	0.0	0.0	0.0	1.807831163032022e-06	0.0	0.0	0.0
A(382)	0.0007014384912564246	V:0.0005351180242574785 , S:9.03915581516011e-06 , T:0.00015728131118378593	0.0	0.0	0.0005351180242574785	9.03915581516011e-06	0.0	0.0	0.0	0.0	0.0	0.00015728131118378593	0.0	0.0	0.0	0.0	0.0	0.0	0.0	0.0	0.0	0.0
P(918)	0.0006996306600933925	L:6.869758419521684e-05 , S:0.0006200860889199836 , N:1.807831163032022e-06 , H:7.231324652128088e-06 , T:1.807831163032022e-06	6.869758419521684e-05	0.0	0.0	0.0006200860889199836	0.0	0.0	0.0	1.807831163032022e-06	7.231324652128088e-06	1.807831163032022e-06	0.0	0.0	0.0	0.0	0.0	0.0	0.0	0.0	0.0	0.0
I(201)	0.0006779366861370083	L:1.807831163032022e-06 , V:0.0006707053614848802 , F:1.807831163032022e-06 , T:3.615662326064044e-06	1.807831163032022e-06	0.0	0.0006707053614848802	0.0	1.807831163032022e-06	0.0	0.0	0.0	0.0	3.615662326064044e-06	0.0	0.0	0.0	0.0	0.0	0.0	0.0	0.0	0.0	0.0
E(922)	0.0006725131926479122	G:3.615662326064044e-06 , D:0.0006634740368327521 , K:5.4234934890960665e-06	0.0	0.0	0.0	0.0	0.0	0.0	0.0	0.0	0.0	0.0	0.0	3.615662326064044e-06	0.0006634740368327521	0.0	0.0	0.0	5.4234934890960665e-06	0.0	0.0	0.0
F(192)	0.0006580505433436561	L:4.8811441401864594e-05 , I:3.615662326064044e-06 , V:0.0005983921149635993 , C:7.231324652128088e-06	4.8811441401864594e-05	3.615662326064044e-06	0.0005983921149635993	0.0	0.0	7.231324652128088e-06	0.0	0.0	0.0	0.0	0.0	0.0	0.0	0.0	0.0	0.0	0.0	0.0	0.0	0.0
T(394)	0.000654434881017592	A:9.943071396676122e-05 , M:0.0005550041670508307	0.0	0.0	0.0	0.0	0.0	0.0	0.0	0.0	0.0	0.0	9.943071396676122e-05	0.0	0.0	0.0	0.0005550041670508307	0.0	0.0	0.0	0.0	0.0
K(160)	0.000650819218691528	N:0.0005803138033332791 , R:4.158011674973651e-05 , E:2.711746744548033e-05 , Q:1.807831163032022e-06	0.0	0.0	0.0	0.0	0.0	0.0	0.0	0.0005803138033332791	0.0	0.0	0.0	0.0	0.0	4.158011674973651e-05	0.0	2.711746744548033e-05	0.0	1.807831163032022e-06	0.0	0.0
V(473)	0.000650819218691528	L:1.807831163032022e-06 , I:6.327409070612077e-05 , F:0.000573082478681151 , A:1.2654818141224155e-05	1.807831163032022e-06	6.327409070612077e-05	0.0	0.0	0.000573082478681151	0.0	0.0	0.0	0.0	0.0	1.2654818141224155e-05	0.0	0.0	0.0	0.0	0.0	0.0	0.0	0.0	0.0
D(445)	0.0006363565693872717	Y:1.0846986978192133e-05 , N:0.0005134240503010943 , G:0.00011208553210798537	0.0	0.0	0.0	0.0	0.0	0.0	1.0846986978192133e-05	0.0005134240503010943	0.0	0.0	0.0	0.00011208553210798537	0.0	0.0	0.0	0.0	0.0	0.0	0.0	0.0
I(244)	0.0006255095824090796	V:3.615662326064044e-06 , T:0.0005929686214745033 , M:2.8925298608512352e-05	0.0	0.0	3.615662326064044e-06	0.0	0.0	0.0	0.0	0.0	0.0	0.0005929686214745033	0.0	0.0	0.0	0.0	2.8925298608512352e-05	0.0	0.0	0.0	0.0	0.0
A(379)	0.0006255095824090796	V:0.0004555734530840696 , S:0.00016089697350984996 , T:5.4234934890960665e-06 , G:1.807831163032022e-06 , P:1.807831163032022e-06	0.0	0.0	0.0004555734530840696	0.00016089697350984996	0.0	0.0	0.0	0.0	0.0	5.4234934890960665e-06	0.0	1.807831163032022e-06	0.0	0.0	0.0	0.0	0.0	0.0	1.807831163032022e-06	0.0
M(668)	0.0006164704265939195	L:2.1693973956384266e-05 , I:0.0005947764526375353	2.1693973956384266e-05	0.0005947764526375353	0.0	0.0	0.0	0.0	0.0	0.0	0.0	0.0	0.0	0.0	0.0	0.0	0.0	0.0	0.0	0.0	0.0	0.0
V(848)	0.0006164704265939195	L:0.0005405415177465746 , I:7.592890884734493e-05	0.0005405415177465746	7.592890884734493e-05	0.0	0.0	0.0	0.0	0.0	0.0	0.0	0.0	0.0	0.0	0.0	0.0	0.0	0.0	0.0	0.0	0.0	0.0
V(405)	0.0006110469331048235	L:1.807831163032022e-06 , I:1.0846986978192133e-05 , F:0.0005929686214745033 , A:1.807831163032022e-06 , G:3.615662326064044e-06	1.807831163032022e-06	1.0846986978192133e-05	0.0	0.0	0.0005929686214745033	0.0	0.0	0.0	0.0	0.0	1.807831163032022e-06	3.615662326064044e-06	0.0	0.0	0.0	0.0	0.0	0.0	0.0	0.0
T(76)	0.0006001999461266313	I:0.0005857372968223752 , N:1.0846986978192133e-05 , A:3.615662326064044e-06	0.0	0.0005857372968223752	0.0	0.0	0.0	0.0	0.0	1.0846986978192133e-05	0.0	0.0	3.615662326064044e-06	0.0	0.0	0.0	0.0	0.0	0.0	0.0	0.0	0.0
T(604)	0.000571274647518119	I:0.00046822827122529375 , S:1.807831163032022e-06 , N:2.1693973956384266e-05 , A:7.954457117340897e-05	0.0	0.00046822827122529375	0.0	1.807831163032022e-06	0.0	0.0	0.0	2.1693973956384266e-05	0.0	0.0	7.954457117340897e-05	0.0	0.0	0.0	0.0	0.0	0.0	0.0	0.0	0.0
T(908)	0.000571274647518119	I:0.0005296945307683825 , A:4.158011674973651e-05	0.0	0.0005296945307683825	0.0	0.0	0.0	0.0	0.0	0.0	0.0	0.0	4.158011674973651e-05	0.0	0.0	0.0	0.0	0.0	0.0	0.0	0.0	0.0
T(803)	0.0005604276605399269	I:0.0003669897260955005 , N:3.615662326064044e-05 , A:0.00015728131118378593	0.0	0.0003669897260955005	0.0	0.0	0.0	0.0	0.0	3.615662326064044e-05	0.0	0.0	0.00015728131118378593	0.0	0.0	0.0	0.0	0.0	0.0	0.0	0.0	0.0
I(171)	0.0005550041670508307	L:1.807831163032022e-06 , V:0.00014824215536862582 , T:2.530963628244831e-05 , M:0.00037783671307369264 , K:1.807831163032022e-06	1.807831163032022e-06	0.0	0.00014824215536862582	0.0	0.0	0.0	0.0	0.0	0.0	2.530963628244831e-05	0.0	0.0	0.0	0.0	0.00037783671307369264	0.0	1.807831163032022e-06	0.0	0.0	0.0
L(829)	0.0005550041670508307	I:1.2654818141224155e-05 , F:0.0005423493489096066	0.0	1.2654818141224155e-05	0.0	0.0	0.0005423493489096066	0.0	0.0	0.0	0.0	0.0	0.0	0.0	0.0	0.0	0.0	0.0	0.0	0.0	0.0	0.0
H(725)	0.0005513885047247667	Y:0.0005007692321598701 , R:4.700361023883257e-05 , Q:3.615662326064044e-06	0.0	0.0	0.0	0.0	0.0	0.0	0.0005007692321598701	0.0	0.0	0.0	0.0	0.0	0.0	4.700361023883257e-05	0.0	0.0	0.0	3.615662326064044e-06	0.0	0.0
T(319)	0.0005441571800726386	I:0.0005423493489096066 , R:1.807831163032022e-06	0.0	0.0005423493489096066	0.0	0.0	0.0	0.0	0.0	0.0	0.0	0.0	0.0	0.0	0.0	1.807831163032022e-06	0.0	0.0	0.0	0.0	0.0	0.0
T(870)	0.0005369258554205105	I:0.0004664204400622617 , A:7.050541535824886e-05	0.0	0.0004664204400622617	0.0	0.0	0.0	0.0	0.0	0.0	0.0	0.0	7.050541535824886e-05	0.0	0.0	0.0	0.0	0.0	0.0	0.0	0.0	0.0
T(644)	0.0005206553749532224	A:1.807831163032022e-06 , M:0.0005170397126271583 , K:1.807831163032022e-06	0.0	0.0	0.0	0.0	0.0	0.0	0.0	0.0	0.0	0.0	1.807831163032022e-06	0.0	0.0	0.0	0.0005170397126271583	0.0	1.807831163032022e-06	0.0	0.0	0.0
D(153)	0.0005025770633229022	V:1.807831163032022e-06 , Y:0.0003362565963239561 , N:5.423493489096066e-05 , A:1.62704804672882e-05 , G:9.219938931463313e-05 , E:1.807831163032022e-06	0.0	0.0	1.807831163032022e-06	0.0	0.0	0.0	0.0003362565963239561	5.423493489096066e-05	0.0	0.0	1.62704804672882e-05	9.219938931463313e-05	0.0	0.0	0.0	1.807831163032022e-06	0.0	0.0	0.0	0.0
N(150)	0.0004953457386707741	S:4.700361023883257e-05 , T:5.4234934890960665e-06 , D:4.519577907580055e-05 , K:0.00039772285586704486	0.0	0.0	0.0	4.700361023883257e-05	0.0	0.0	0.0	0.0	0.0	5.4234934890960665e-06	0.0	0.0	4.519577907580055e-05	0.0	0.0	0.0	0.00039772285586704486	0.0	0.0	0.0
T(643)	0.00048811441401864597	I:0.0004537656219210375 , A:3.434879209760842e-05	0.0	0.0004537656219210375	0.0	0.0	0.0	0.0	0.0	0.0	0.0	0.0	3.434879209760842e-05	0.0	0.0	0.0	0.0	0.0	0.0	0.0	0.0	0.0
A(656)	0.00048088308936651786	V:8.316023349947302e-05 , S:0.0002928686484111876 , T:0.00010123854512979324 , P:3.615662326064044e-06	0.0	0.0	8.316023349947302e-05	0.0002928686484111876	0.0	0.0	0.0	0.0	0.0	0.00010123854512979324	0.0	0.0	0.0	0.0	0.0	0.0	0.0	0.0	3.615662326064044e-06	0.0
Y(719)	0.00047907525820348586	F:0.00033987225865002014 , C:0.00013558733722740166 , H:3.615662326064044e-06	0.0	0.0	0.0	0.0	0.00033987225865002014	0.00013558733722740166	0.0	0.0	3.615662326064044e-06	0.0	0.0	0.0	0.0	0.0	0.0	0.0	0.0	0.0	0.0	0.0
A(46)	0.0004754595958774218	V:3.615662326064044e-05 , S:0.00043026381680162125 , T:9.03915581516011e-06	0.0	0.0	3.615662326064044e-05	0.00043026381680162125	0.0	0.0	0.0	0.0	0.0	9.03915581516011e-06	0.0	0.0	0.0	0.0	0.0	0.0	0.0	0.0	0.0	0.0
A(2)	0.0004736517647143898	V:0.00039591502470401286 , S:1.62704804672882e-05 , T:2.530963628244831e-05 , D:3.615662326064044e-05	0.0	0.0	0.00039591502470401286	1.62704804672882e-05	0.0	0.0	0.0	0.0	0.0	2.530963628244831e-05	0.0	0.0	3.615662326064044e-05	0.0	0.0	0.0	0.0	0.0	0.0	0.0
I(223)	0.00047003610238832575	L:0.0003651818949324685 , V:1.0846986978192133e-05 , T:1.807831163032022e-06 , M:9.219938931463313e-05	0.0003651818949324685	0.0	1.0846986978192133e-05	0.0	0.0	0.0	0.0	0.0	0.0	1.807831163032022e-06	0.0	0.0	0.0	0.0	9.219938931463313e-05	0.0	0.0	0.0	0.0	0.0
T(20)	0.0004519577907580055	I:4.158011674973651e-05 , A:0.00041037767400826903	0.0	4.158011674973651e-05	0.0	0.0	0.0	0.0	0.0	0.0	0.0	0.0	0.00041037767400826903	0.0	0.0	0.0	0.0	0.0	0.0	0.0	0.0	0.0
R(249)	0.0004501499595949735	S:3.615662326064044e-05 , G:2.711746744548033e-05 , M:0.00025671202515054715 , K:0.0001301638437383056	0.0	0.0	0.0	3.615662326064044e-05	0.0	0.0	0.0	0.0	0.0	0.0	0.0	2.711746744548033e-05	0.0	0.0	0.00025671202515054715	0.0	0.0001301638437383056	0.0	0.0	0.0
Y(521)	0.00044653429726890947	S:1.807831163032022e-06 , F:4.158011674973651e-05 , C:0.0003760288819106606 , H:2.711746744548033e-05	0.0	0.0	0.0	1.807831163032022e-06	4.158011674973651e-05	0.0003760288819106606	0.0	0.0	2.711746744548033e-05	0.0	0.0	0.0	0.0	0.0	0.0	0.0	0.0	0.0	0.0	0.0
V(588)	0.00044653429726890947	L:0.00043930297261678136 , A:7.231324652128088e-06	0.00043930297261678136	0.0	0.0	0.0	0.0	0.0	0.0	0.0	0.0	0.0	7.231324652128088e-06	0.0	0.0	0.0	0.0	0.0	0.0	0.0	0.0	0.0
V(720)	0.00044653429726890947	I:0.00015366564885772188 , F:1.2654818141224155e-05 , A:0.00027659816794389937 , G:3.615662326064044e-06	0.0	0.00015366564885772188	0.0	0.0	1.2654818141224155e-05	0.0	0.0	0.0	0.0	0.0	0.00027659816794389937	3.615662326064044e-06	0.0	0.0	0.0	0.0	0.0	0.0	0.0	0.0
V(667)	0.0004356873102907173	I:0.0004356873102907173	0.0	0.0004356873102907173	0.0	0.0	0.0	0.0	0.0	0.0	0.0	0.0	0.0	0.0	0.0	0.0	0.0	0.0	0.0	0.0	0.0	0.0
V(231)	0.0004356873102907173	I:0.00042122466098646114 , F:1.4462649304256176e-05	0.0	0.00042122466098646114	0.0	0.0	1.4462649304256176e-05	0.0	0.0	0.0	0.0	0.0	0.0	0.0	0.0	0.0	0.0	0.0	0.0	0.0	0.0	0.0
D(140)	0.00043026381680162125	Y:0.00037783671307369264 , N:1.2654818141224155e-05 , H:1.807831163032022e-06 , A:7.231324652128088e-06 , G:2.711746744548033e-05 , E:3.615662326064044e-06	0.0	0.0	0.0	0.0	0.0	0.0	0.00037783671307369264	1.2654818141224155e-05	1.807831163032022e-06	0.0	7.231324652128088e-06	2.711746744548033e-05	0.0	0.0	0.0	3.615662326064044e-06	0.0	0.0	0.0	0.0
T(246)	0.00041941682982342914	I:0.000408569842845237 , A:9.03915581516011e-06 , P:1.807831163032022e-06	0.0	0.000408569842845237	0.0	0.0	0.0	0.0	0.0	0.0	0.0	0.0	9.03915581516011e-06	0.0	0.0	0.0	0.0	0.0	0.0	0.0	1.807831163032022e-06	0.0
E(729)	0.000406762011682205	V:1.807831163032022e-06 , A:0.00035795057028034037 , G:7.231324652128088e-06 , D:3.9772285586704484e-05	0.0	0.0	1.807831163032022e-06	0.0	0.0	0.0	0.0	0.0	0.0	0.0	0.00035795057028034037	7.231324652128088e-06	3.9772285586704484e-05	0.0	0.0	0.0	0.0	0.0	0.0	0.0
Q(191)	0.00038145237539975664	L:5.6042766053992684e-05 , H:1.2654818141224155e-05 , R:0.00030913912887847576 , K:1.807831163032022e-06 , P:1.807831163032022e-06	5.6042766053992684e-05	0.0	0.0	0.0	0.0	0.0	0.0	0.0	1.2654818141224155e-05	0.0	0.0	0.0	0.0	0.00030913912887847576	0.0	0.0	1.807831163032022e-06	0.0	1.807831163032022e-06	0.0
T(259)	0.00037964454423672464	I:0.0002946764795742196 , S:1.4462649304256176e-05 , N:1.62704804672882e-05 , A:5.423493489096066e-05	0.0	0.0002946764795742196	0.0	1.4462649304256176e-05	0.0	0.0	0.0	1.62704804672882e-05	0.0	0.0	5.423493489096066e-05	0.0	0.0	0.0	0.0	0.0	0.0	0.0	0.0	0.0
I(266)	0.0003760288819106606	V:0.00037060538842156453 , T:5.4234934890960665e-06	0.0	0.0	0.00037060538842156453	0.0	0.0	0.0	0.0	0.0	0.0	5.4234934890960665e-06	0.0	0.0	0.0	0.0	0.0	0.0	0.0	0.0	0.0	0.0
N(198)	0.00036879755725853253	S:0.00022597889537900276 , H:1.2654818141224155e-05 , T:5.061927256489662e-05 , D:1.62704804672882e-05 , K:6.327409070612077e-05	0.0	0.0	0.0	0.00022597889537900276	0.0	0.0	0.0	0.0	1.2654818141224155e-05	5.061927256489662e-05	0.0	0.0	1.62704804672882e-05	0.0	0.0	0.0	6.327409070612077e-05	0.0	0.0	0.0
A(585)	0.0003669897260955005	V:0.00030009997306331565 , S:3.9772285586704484e-05 , T:2.711746744548033e-05	0.0	0.0	0.00030009997306331565	3.9772285586704484e-05	0.0	0.0	0.0	0.0	0.0	2.711746744548033e-05	0.0	0.0	0.0	0.0	0.0	0.0	0.0	0.0	0.0	0.0
T(276)	0.0003651818949324685	A:2.1693973956384266e-05 , M:0.0003434879209760842	0.0	0.0	0.0	0.0	0.0	0.0	0.0	0.0	0.0	0.0	2.1693973956384266e-05	0.0	0.0	0.0	0.0003434879209760842	0.0	0.0	0.0	0.0	0.0
R(118)	0.0003525270767912443	L:3.615662326064044e-06 , S:5.4234934890960665e-06 , C:0.00021513190840081063 , H:0.00012835601257527357	3.615662326064044e-06	0.0	0.0	5.4234934890960665e-06	0.0	0.00021513190840081063	0.0	0.0	0.00012835601257527357	0.0	0.0	0.0	0.0	0.0	0.0	0.0	0.0	0.0	0.0	0.0
D(738)	0.0003525270767912443	Y:0.0003434879209760842 , N:5.4234934890960665e-06 , H:1.807831163032022e-06 , E:1.807831163032022e-06	0.0	0.0	0.0	0.0	0.0	0.0	0.0003434879209760842	5.4234934890960665e-06	1.807831163032022e-06	0.0	0.0	0.0	0.0	0.0	0.0	1.807831163032022e-06	0.0	0.0	0.0	0.0
D(736)	0.00034710358330214826	Y:2.1693973956384266e-05 , N:1.9886142793352242e-05 , A:5.4234934890960665e-06 , G:0.00029106081724815554 , E:9.03915581516011e-06	0.0	0.0	0.0	0.0	0.0	0.0	2.1693973956384266e-05	1.9886142793352242e-05	0.0	0.0	5.4234934890960665e-06	0.00029106081724815554	0.0	0.0	0.0	9.03915581516011e-06	0.0	0.0	0.0	0.0
T(262)	0.00033987225865002014	I:0.00025851985631357915 , A:7.412107768431291e-05 , K:7.231324652128088e-06	0.0	0.00025851985631357915	0.0	0.0	0.0	0.0	0.0	0.0	0.0	0.0	7.412107768431291e-05	0.0	0.0	0.0	0.0	0.0	7.231324652128088e-06	0.0	0.0	0.0
A(797)	0.00033987225865002014	V:0.0002820216614329954 , S:9.03915581516011e-06 , T:2.8925298608512352e-05 , E:1.9886142793352242e-05	0.0	0.0	0.0002820216614329954	9.03915581516011e-06	0.0	0.0	0.0	0.0	0.0	2.8925298608512352e-05	0.0	0.0	0.0	0.0	0.0	1.9886142793352242e-05	0.0	0.0	0.0	0.0
G(44)	0.00033806442748698814	L:3.615662326064044e-06 , V:0.00033083310283486003 , S:1.807831163032022e-06 , C:1.807831163032022e-06	3.615662326064044e-06	0.0	0.00033083310283486003	1.807831163032022e-06	0.0	1.807831163032022e-06	0.0	0.0	0.0	0.0	0.0	0.0	0.0	0.0	0.0	0.0	0.0	0.0	0.0	0.0
D(258)	0.0003344487651609241	Y:1.807831163032022e-05 , N:4.519577907580055e-05 , A:5.4234934890960665e-06 , G:0.00024948070049841904 , E:1.62704804672882e-05	0.0	0.0	0.0	0.0	0.0	0.0	1.807831163032022e-05	4.519577907580055e-05	0.0	0.0	5.4234934890960665e-06	0.00024948070049841904	0.0	0.0	0.0	1.62704804672882e-05	0.0	0.0	0.0	0.0
P(830)	0.0003326409339978921	L:7.231324652128088e-06 , S:0.000325409609345764	7.231324652128088e-06	0.0	0.0	0.000325409609345764	0.0	0.0	0.0	0.0	0.0	0.0	0.0	0.0	0.0	0.0	0.0	0.0	0.0	0.0	0.0	0.0
D(284)	0.00033083310283486003	Y:0.00016451263583591402 , N:6.327409070612077e-05 , H:1.807831163032022e-06 , G:7.773674001037695e-05 , E:2.3501805119416287e-05	0.0	0.0	0.0	0.0	0.0	0.0	0.00016451263583591402	6.327409070612077e-05	1.807831163032022e-06	0.0	0.0	7.773674001037695e-05	0.0	0.0	0.0	2.3501805119416287e-05	0.0	0.0	0.0	0.0
K(98)	0.00031817828469363587	I:3.615662326064044e-06 , T:5.4234934890960665e-06 , G:1.807831163032022e-06 , R:0.00011208553210798537 , E:0.00019524576560745838	0.0	3.615662326064044e-06	0.0	0.0	0.0	0.0	0.0	0.0	0.0	5.4234934890960665e-06	0.0	1.807831163032022e-06	0.0	0.00011208553210798537	0.0	0.00019524576560745838	0.0	0.0	0.0	0.0
R(285)	0.0003109469600415078	L:1.4462649304256176e-05 , C:0.00017535962281410616 , H:0.00012112468792314548	1.4462649304256176e-05	0.0	0.0	0.0	0.0	0.00017535962281410616	0.0	0.0	0.00012112468792314548	0.0	0.0	0.0	0.0	0.0	0.0	0.0	0.0	0.0	0.0	0.0
H(82)	0.0003109469600415078	L:3.615662326064044e-06 , Y:0.0002711746744548033 , R:3.25409609345764e-05 , Q:3.615662326064044e-06	3.615662326064044e-06	0.0	0.0	0.0	0.0	0.0	0.0002711746744548033	0.0	0.0	0.0	0.0	0.0	0.0	3.25409609345764e-05	0.0	0.0	0.0	3.615662326064044e-06	0.0	0.0
A(4)	0.00030913912887847576	V:0.00030009997306331565 , S:3.615662326064044e-06 , T:5.4234934890960665e-06	0.0	0.0	0.00030009997306331565	3.615662326064044e-06	0.0	0.0	0.0	0.0	0.0	5.4234934890960665e-06	0.0	0.0	0.0	0.0	0.0	0.0	0.0	0.0	0.0	0.0
R(750)	0.00030733129771544376	L:1.4462649304256176e-05 , S:0.00015185781769468985 , C:3.9772285586704484e-05 , H:0.00010123854512979324	1.4462649304256176e-05	0.0	0.0	0.00015185781769468985	0.0	3.9772285586704484e-05	0.0	0.0	0.00010123854512979324	0.0	0.0	0.0	0.0	0.0	0.0	0.0	0.0	0.0	0.0	0.0
L(514)	0.0003037156353893797	I:3.615662326064044e-06 , V:3.615662326064044e-06 , F:0.00029648431073725165	0.0	3.615662326064044e-06	3.615662326064044e-06	0.0	0.00029648431073725165	0.0	0.0	0.0	0.0	0.0	0.0	0.0	0.0	0.0	0.0	0.0	0.0	0.0	0.0	0.0
S(229)	0.0003019078042263477	I:9.03915581516011e-06 , N:0.00020609275258565051 , G:8.496806466250504e-05 , R:1.807831163032022e-06	0.0	9.03915581516011e-06	0.0	0.0	0.0	0.0	0.0	0.00020609275258565051	0.0	0.0	0.0	8.496806466250504e-05	0.0	1.807831163032022e-06	0.0	0.0	0.0	0.0	0.0	0.0
A(399)	0.00030009997306331565	V:5.4234934890960665e-06 , S:9.03915581516011e-06 , T:0.0002856373237590595	0.0	0.0	5.4234934890960665e-06	9.03915581516011e-06	0.0	0.0	0.0	0.0	0.0	0.0002856373237590595	0.0	0.0	0.0	0.0	0.0	0.0	0.0	0.0	0.0	0.0
A(923)	0.00029829214190028365	V:0.0001717439604880421 , S:8.496806466250504e-05 , Y:1.807831163032022e-06 , T:3.796445442367246e-05 , D:1.807831163032022e-06	0.0	0.0	0.0001717439604880421	8.496806466250504e-05	0.0	0.0	1.807831163032022e-06	0.0	0.0	3.796445442367246e-05	0.0	0.0	1.807831163032022e-06	0.0	0.0	0.0	0.0	0.0	0.0	0.0
S(451)	0.0002946764795742196	I:2.3501805119416287e-05 , C:9.03915581516011e-06 , N:2.530963628244831e-05 , G:9.03915581516011e-06 , R:0.0002277867265420348	0.0	2.3501805119416287e-05	0.0	0.0	0.0	9.03915581516011e-06	0.0	2.530963628244831e-05	0.0	0.0	0.0	9.03915581516011e-06	0.0	0.0002277867265420348	0.0	0.0	0.0	0.0	0.0	0.0
A(195)	0.0002946764795742196	V:0.0001464343242055938 , S:1.807831163032022e-06 , T:0.00014462649304256177 , D:1.807831163032022e-06	0.0	0.0	0.0001464343242055938	1.807831163032022e-06	0.0	0.0	0.0	0.0	0.0	0.00014462649304256177	0.0	0.0	1.807831163032022e-06	0.0	0.0	0.0	0.0	0.0	0.0	0.0
A(423)	0.0002946764795742196	V:0.00028744515492209154 , S:5.4234934890960665e-06 , T:1.807831163032022e-06	0.0	0.0	0.00028744515492209154	5.4234934890960665e-06	0.0	0.0	0.0	0.0	0.0	1.807831163032022e-06	0.0	0.0	0.0	0.0	0.0	0.0	0.0	0.0	0.0	0.0
V(637)	0.0002946764795742196	I:0.0002784059991069314 , F:1.0846986978192133e-05 , A:5.4234934890960665e-06	0.0	0.0002784059991069314	0.0	0.0	1.0846986978192133e-05	0.0	0.0	0.0	0.0	0.0	5.4234934890960665e-06	0.0	0.0	0.0	0.0	0.0	0.0	0.0	0.0	0.0
M(380)	0.00028925298608512354	I:0.0002802138302699634 , V:9.03915581516011e-06	0.0	0.0002802138302699634	9.03915581516011e-06	0.0	0.0	0.0	0.0	0.0	0.0	0.0	0.0	0.0	0.0	0.0	0.0	0.0	0.0	0.0	0.0	0.0
G(25)	0.00028925298608512354	V:4.338794791276853e-05 , S:1.807831163032022e-06 , C:1.807831163032022e-06 , Y:0.00010485420745585728 , A:5.4234934890960665e-06 , D:0.0001319716749013376	0.0	0.0	4.338794791276853e-05	1.807831163032022e-06	0.0	1.807831163032022e-06	0.00010485420745585728	0.0	0.0	0.0	5.4234934890960665e-06	0.0	0.0001319716749013376	0.0	0.0	0.0	0.0	0.0	0.0	0.0
F(594)	0.0002856373237590595	L:7.231324652128088e-06 , C:0.0002784059991069314	7.231324652128088e-06	0.0	0.0	0.0	0.0	0.0002784059991069314	0.0	0.0	0.0	0.0	0.0	0.0	0.0	0.0	0.0	0.0	0.0	0.0	0.0	0.0
K(780)	0.0002820216614329954	N:1.807831163032022e-06 , T:4.519577907580055e-05 , R:0.0002223632330529387 , E:1.2654818141224155e-05	0.0	0.0	0.0	0.0	0.0	0.0	0.0	1.807831163032022e-06	0.0	4.519577907580055e-05	0.0	0.0	0.0	0.0002223632330529387	0.0	1.2654818141224155e-05	0.0	0.0	0.0	0.0
D(893)	0.0002802138302699634	V:7.231324652128088e-06 , Y:0.0002621355186396432 , N:1.807831163032022e-06 , H:3.615662326064044e-06 , A:3.615662326064044e-06 , E:1.807831163032022e-06	0.0	0.0	7.231324652128088e-06	0.0	0.0	0.0	0.0002621355186396432	1.807831163032022e-06	3.615662326064044e-06	0.0	3.615662326064044e-06	0.0	0.0	0.0	0.0	1.807831163032022e-06	0.0	0.0	0.0	0.0
C(697)	0.00027479033678086737	S:3.615662326064044e-06 , F:0.0002639433498026752 , Y:7.231324652128088e-06	0.0	0.0	0.0	3.615662326064044e-06	0.0002639433498026752	0.0	7.231324652128088e-06	0.0	0.0	0.0	0.0	0.0	0.0	0.0	0.0	0.0	0.0	0.0	0.0	0.0
P(461)	0.0002711746744548033	S:0.00015185781769468985 , T:0.00011750902559708144 , Q:1.807831163032022e-06	0.0	0.0	0.0	0.00015185781769468985	0.0	0.0	0.0	0.0	0.0	0.00011750902559708144	0.0	0.0	0.0	0.0	0.0	0.0	0.0	1.807831163032022e-06	0.0	0.0
N(743)	0.00025851985631357915	I:2.8925298608512352e-05 , S:0.00014462649304256177 , Y:5.4234934890960665e-06 , H:1.2654818141224155e-05 , T:9.03915581516011e-06 , D:5.423493489096066e-05 , K:3.615662326064044e-06	0.0	2.8925298608512352e-05	0.0	0.00014462649304256177	0.0	0.0	5.4234934890960665e-06	0.0	1.2654818141224155e-05	9.03915581516011e-06	0.0	0.0	5.423493489096066e-05	0.0	0.0	0.0	3.615662326064044e-06	0.0	0.0	0.0
L(302)	0.0002530963628244831	V:3.615662326064044e-06 , S:0.00019524576560745838 , F:5.423493489096066e-05	0.0	0.0	3.615662326064044e-06	0.00019524576560745838	5.423493489096066e-05	0.0	0.0	0.0	0.0	0.0	0.0	0.0	0.0	0.0	0.0	0.0	0.0	0.0	0.0	0.0
L(270)	0.0002512885316614511	F:0.000245865038172355 , M:5.4234934890960665e-06	0.0	0.0	0.0	0.0	0.000245865038172355	0.0	0.0	0.0	0.0	0.0	0.0	0.0	0.0	0.0	5.4234934890960665e-06	0.0	0.0	0.0	0.0	0.0
Q(444)	0.0002512885316614511	H:0.00013558733722740166 , R:0.00010485420745585728 , E:5.4234934890960665e-06 , K:5.4234934890960665e-06	0.0	0.0	0.0	0.0	0.0	0.0	0.0	0.0	0.00013558733722740166	0.0	0.0	0.0	0.0	0.00010485420745585728	0.0	5.4234934890960665e-06	5.4234934890960665e-06	0.0	0.0	0.0
I(466)	0.00024767286933538704	V:0.00022417106421597074 , S:1.807831163032022e-06 , T:2.1693973956384266e-05	0.0	0.0	0.00022417106421597074	1.807831163032022e-06	0.0	0.0	0.0	0.0	0.0	2.1693973956384266e-05	0.0	0.0	0.0	0.0	0.0	0.0	0.0	0.0	0.0	0.0
V(299)	0.00024767286933538704	I:5.4234934890960665e-06 , F:0.00022597889537900276 , A:1.4462649304256176e-05 , G:1.807831163032022e-06	0.0	5.4234934890960665e-06	0.0	0.0	0.00022597889537900276	0.0	0.0	0.0	0.0	0.0	1.4462649304256176e-05	1.807831163032022e-06	0.0	0.0	0.0	0.0	0.0	0.0	0.0	0.0
F(101)	0.000245865038172355	C:0.000245865038172355	0.0	0.0	0.0	0.0	0.0	0.000245865038172355	0.0	0.0	0.0	0.0	0.0	0.0	0.0	0.0	0.0	0.0	0.0	0.0	0.0	0.0
E(876)	0.0002368258823571949	G:5.4234934890960665e-06 , D:0.00023140238886809882	0.0	0.0	0.0	0.0	0.0	0.0	0.0	0.0	0.0	0.0	0.0	5.4234934890960665e-06	0.00023140238886809882	0.0	0.0	0.0	0.0	0.0	0.0	0.0
V(111)	0.00023501805119416287	L:1.807831163032022e-05 , I:0.00016451263583591402 , A:5.242710372792864e-05	1.807831163032022e-05	0.00016451263583591402	0.0	0.0	0.0	0.0	0.0	0.0	0.0	0.0	5.242710372792864e-05	0.0	0.0	0.0	0.0	0.0	0.0	0.0	0.0	0.0
N(491)	0.00023501805119416287	V:1.62704804672882e-05 , S:0.00020970841491171457 , T:1.807831163032022e-06 , D:1.807831163032022e-06 , K:5.4234934890960665e-06	0.0	0.0	1.62704804672882e-05	0.00020970841491171457	0.0	0.0	0.0	0.0	0.0	1.807831163032022e-06	0.0	0.0	1.807831163032022e-06	0.0	0.0	0.0	5.4234934890960665e-06	0.0	0.0	0.0
V(330)	0.00023321022003113085	L:0.0002042849214226185 , A:2.711746744548033e-05 , E:1.807831163032022e-06	0.0002042849214226185	0.0	0.0	0.0	0.0	0.0	0.0	0.0	0.0	0.0	2.711746744548033e-05	0.0	0.0	0.0	0.0	1.807831163032022e-06	0.0	0.0	0.0	0.0
G(774)	0.00022417106421597074	V:1.807831163032022e-06 , S:0.00018982227211836232 , C:2.8925298608512352e-05 , D:3.615662326064044e-06	0.0	0.0	1.807831163032022e-06	0.00018982227211836232	0.0	2.8925298608512352e-05	0.0	0.0	0.0	0.0	0.0	0.0	3.615662326064044e-06	0.0	0.0	0.0	0.0	0.0	0.0	0.0
V(424)	0.0002223632330529387	L:0.00020790058374868254 , A:3.615662326064044e-06 , M:1.0846986978192133e-05	0.00020790058374868254	0.0	0.0	0.0	0.0	0.0	0.0	0.0	0.0	0.0	3.615662326064044e-06	0.0	0.0	0.0	1.0846986978192133e-05	0.0	0.0	0.0	0.0	0.0
D(499)	0.00021874757072687468	Y:3.615662326064044e-06 , N:0.00018982227211836232 , E:2.530963628244831e-05	0.0	0.0	0.0	0.0	0.0	0.0	3.615662326064044e-06	0.00018982227211836232	0.0	0.0	0.0	0.0	0.0	0.0	0.0	2.530963628244831e-05	0.0	0.0	0.0	0.0
V(880)	0.00021693973956384265	L:1.807831163032022e-06 , I:0.0002133240772377786 , F:1.807831163032022e-06	1.807831163032022e-06	0.0002133240772377786	0.0	0.0	1.807831163032022e-06	0.0	0.0	0.0	0.0	0.0	0.0	0.0	0.0	0.0	0.0	0.0	0.0	0.0	0.0	0.0
H(599)	0.00021693973956384265	Y:0.00020970841491171457 , N:1.807831163032022e-06 , D:1.807831163032022e-06 , Q:3.615662326064044e-06	0.0	0.0	0.0	0.0	0.0	0.0	0.00020970841491171457	1.807831163032022e-06	0.0	0.0	0.0	0.0	1.807831163032022e-06	0.0	0.0	0.0	0.0	3.615662326064044e-06	0.0	0.0
A(250)	0.00021513190840081063	V:0.00014281866187952974 , T:6.869758419521684e-05 , G:3.615662326064044e-06	0.0	0.0	0.00014281866187952974	0.0	0.0	0.0	0.0	0.0	0.0	6.869758419521684e-05	0.0	3.615662326064044e-06	0.0	0.0	0.0	0.0	0.0	0.0	0.0	0.0
D(92)	0.00021513190840081063	Y:5.4234934890960665e-06 , N:4.158011674973651e-05 , H:5.242710372792864e-05 , A:1.2654818141224155e-05 , G:9.762288280372919e-05 , E:5.4234934890960665e-06	0.0	0.0	0.0	0.0	0.0	0.0	5.4234934890960665e-06	4.158011674973651e-05	5.242710372792864e-05	0.0	1.2654818141224155e-05	9.762288280372919e-05	0.0	0.0	0.0	5.4234934890960665e-06	0.0	0.0	0.0	0.0
E(436)	0.00021513190840081063	A:5.4234934890960665e-06 , G:0.00020066925909655446 , D:5.4234934890960665e-06 , K:3.615662326064044e-06	0.0	0.0	0.0	0.0	0.0	0.0	0.0	0.0	0.0	0.0	5.4234934890960665e-06	0.00020066925909655446	5.4234934890960665e-06	0.0	0.0	0.0	3.615662326064044e-06	0.0	0.0	0.0
G(228)	0.0002133240772377786	V:1.62704804672882e-05 , S:0.0001229325190861775 , C:2.530963628244831e-05 , D:4.158011674973651e-05 , R:5.4234934890960665e-06 , W:1.807831163032022e-06	0.0	0.0	1.62704804672882e-05	0.0001229325190861775	0.0	2.530963628244831e-05	0.0	0.0	0.0	0.0	0.0	0.0	4.158011674973651e-05	5.4234934890960665e-06	0.0	0.0	0.0	0.0	0.0	1.807831163032022e-06
V(320)	0.0002133240772377786	L:5.061927256489662e-05 , A:0.000162704804672882	5.061927256489662e-05	0.0	0.0	0.0	0.0	0.0	0.0	0.0	0.0	0.0	0.000162704804672882	0.0	0.0	0.0	0.0	0.0	0.0	0.0	0.0	0.0
L(261)	0.00020790058374868254	I:3.615662326064044e-06 , V:3.615662326064044e-06 , S:1.62704804672882e-05 , C:0.00018439877862926627	0.0	3.615662326064044e-06	3.615662326064044e-06	1.62704804672882e-05	0.0	0.00018439877862926627	0.0	0.0	0.0	0.0	0.0	0.0	0.0	0.0	0.0	0.0	0.0	0.0	0.0	0.0
D(60)	0.00020609275258565051	Y:0.00014824215536862582 , N:3.434879209760842e-05 , G:1.0846986978192133e-05 , E:1.2654818141224155e-05	0.0	0.0	0.0	0.0	0.0	0.0	0.00014824215536862582	3.434879209760842e-05	0.0	0.0	0.0	1.0846986978192133e-05	0.0	0.0	0.0	1.2654818141224155e-05	0.0	0.0	0.0	0.0
C(22)	0.0002042849214226185	F:0.00015004998653165782 , Y:4.158011674973651e-05 , R:1.2654818141224155e-05	0.0	0.0	0.0	0.0	0.00015004998653165782	0.0	4.158011674973651e-05	0.0	0.0	0.0	0.0	0.0	0.0	1.2654818141224155e-05	0.0	0.0	0.0	0.0	0.0	0.0
Q(357)	0.0002024770902595865	L:3.615662326064044e-06 , H:0.00019886142793352243	3.615662326064044e-06	0.0	0.0	0.0	0.0	0.0	0.0	0.0	0.00019886142793352243	0.0	0.0	0.0	0.0	0.0	0.0	0.0	0.0	0.0	0.0	0.0
A(130)	0.00019886142793352243	V:8.1352402336441e-05 , S:3.615662326064044e-06 , T:0.00011208553210798537 , P:1.807831163032022e-06	0.0	0.0	8.1352402336441e-05	3.615662326064044e-06	0.0	0.0	0.0	0.0	0.0	0.00011208553210798537	0.0	0.0	0.0	0.0	0.0	0.0	0.0	0.0	1.807831163032022e-06	0.0
N(158)	0.00019524576560745838	S:0.00016632046699894604 , Y:1.0846986978192133e-05 , T:5.4234934890960665e-06 , D:1.0846986978192133e-05 , K:1.807831163032022e-06	0.0	0.0	0.0	0.00016632046699894604	0.0	0.0	1.0846986978192133e-05	0.0	0.0	5.4234934890960665e-06	0.0	0.0	1.0846986978192133e-05	0.0	0.0	0.0	1.807831163032022e-06	0.0	0.0	0.0
T(591)	0.00019343793444442638	I:0.00015366564885772188 , A:3.9772285586704484e-05	0.0	0.00015366564885772188	0.0	0.0	0.0	0.0	0.0	0.0	0.0	0.0	3.9772285586704484e-05	0.0	0.0	0.0	0.0	0.0	0.0	0.0	0.0	0.0
V(737)	0.00019343793444442638	I:0.000162704804672882 , F:1.807831163032022e-05 , A:1.2654818141224155e-05	0.0	0.000162704804672882	0.0	0.0	1.807831163032022e-05	0.0	0.0	0.0	0.0	0.0	1.2654818141224155e-05	0.0	0.0	0.0	0.0	0.0	0.0	0.0	0.0	0.0
L(636)	0.00019163010328139435	I:2.1693973956384266e-05 , F:0.00015366564885772188 , C:1.62704804672882e-05	0.0	2.1693973956384266e-05	0.0	0.0	0.00015366564885772188	1.62704804672882e-05	0.0	0.0	0.0	0.0	0.0	0.0	0.0	0.0	0.0	0.0	0.0	0.0	0.0	0.0
A(406)	0.00018620660979229827	V:4.158011674973651e-05 , S:8.1352402336441e-05 , T:7.231324652128088e-06 , G:3.615662326064044e-06 , D:5.061927256489662e-05 , P:1.807831163032022e-06	0.0	0.0	4.158011674973651e-05	8.1352402336441e-05	0.0	0.0	0.0	0.0	0.0	7.231324652128088e-06	0.0	3.615662326064044e-06	5.061927256489662e-05	0.0	0.0	0.0	0.0	0.0	1.807831163032022e-06	0.0
Y(273)	0.00018620660979229827	C:9.762288280372919e-05 , N:3.615662326064044e-06 , H:8.496806466250504e-05	0.0	0.0	0.0	0.0	0.0	9.762288280372919e-05	0.0	3.615662326064044e-06	8.496806466250504e-05	0.0	0.0	0.0	0.0	0.0	0.0	0.0	0.0	0.0	0.0	0.0
L(648)	0.00018620660979229827	V:3.615662326064044e-06 , S:7.231324652128088e-06 , F:0.00017535962281410616	0.0	0.0	3.615662326064044e-06	7.231324652128088e-06	0.00017535962281410616	0.0	0.0	0.0	0.0	0.0	0.0	0.0	0.0	0.0	0.0	0.0	0.0	0.0	0.0	0.0
T(586)	0.00018439877862926627	I:0.00016993612932501007 , A:1.4462649304256176e-05	0.0	0.00016993612932501007	0.0	0.0	0.0	0.0	0.0	0.0	0.0	0.0	1.4462649304256176e-05	0.0	0.0	0.0	0.0	0.0	0.0	0.0	0.0	0.0
D(107)	0.00018439877862926627	V:3.615662326064044e-06 , Y:6.146625954308875e-05 , N:1.62704804672882e-05 , A:2.3501805119416287e-05 , G:1.9886142793352242e-05 , E:5.965842838005673e-05	0.0	0.0	3.615662326064044e-06	0.0	0.0	0.0	6.146625954308875e-05	1.62704804672882e-05	0.0	0.0	2.3501805119416287e-05	1.9886142793352242e-05	0.0	0.0	0.0	5.965842838005673e-05	0.0	0.0	0.0	0.0
P(264)	0.00018259094746623424	L:3.615662326064044e-06 , S:0.00015366564885772188 , H:2.1693973956384266e-05 , T:3.615662326064044e-06	3.615662326064044e-06	0.0	0.0	0.00015366564885772188	0.0	0.0	0.0	0.0	2.1693973956384266e-05	3.615662326064044e-06	0.0	0.0	0.0	0.0	0.0	0.0	0.0	0.0	0.0	0.0
Q(875)	0.0001807831163032022	L:1.807831163032022e-06 , H:0.00011750902559708144 , R:1.0846986978192133e-05 , E:3.796445442367246e-05 , K:1.2654818141224155e-05	1.807831163032022e-06	0.0	0.0	0.0	0.0	0.0	0.0	0.0	0.00011750902559708144	0.0	0.0	0.0	0.0	1.0846986978192133e-05	0.0	3.796445442367246e-05	1.2654818141224155e-05	0.0	0.0	0.0
D(161)	0.0001807831163032022	Y:0.0001229325190861775 , N:2.1693973956384266e-05 , H:1.807831163032022e-06 , A:1.807831163032022e-06 , G:7.231324652128088e-06 , E:2.530963628244831e-05	0.0	0.0	0.0	0.0	0.0	0.0	0.0001229325190861775	2.1693973956384266e-05	1.807831163032022e-06	0.0	1.807831163032022e-06	7.231324652128088e-06	0.0	0.0	0.0	2.530963628244831e-05	0.0	0.0	0.0	0.0
D(109)	0.00017897528514017018	V:9.03915581516011e-06 , Y:1.62704804672882e-05 , N:1.807831163032022e-06 , H:4.519577907580055e-05 , A:3.615662326064044e-06 , G:9.219938931463313e-05 , E:1.0846986978192133e-05	0.0	0.0	9.03915581516011e-06	0.0	0.0	0.0	1.62704804672882e-05	1.807831163032022e-06	4.519577907580055e-05	0.0	3.615662326064044e-06	9.219938931463313e-05	0.0	0.0	0.0	1.0846986978192133e-05	0.0	0.0	0.0	0.0
K(603)	0.00017535962281410616	R:4.8811441401864594e-05 , E:0.0001229325190861775 , Q:3.615662326064044e-06	0.0	0.0	0.0	0.0	0.0	0.0	0.0	0.0	0.0	0.0	0.0	0.0	0.0	4.8811441401864594e-05	0.0	0.0001229325190861775	0.0	3.615662326064044e-06	0.0	0.0
I(536)	0.00017535962281410616	L:7.231324652128088e-06 , V:5.242710372792864e-05 , S:1.807831163032022e-06 , T:0.0001138933632710174	7.231324652128088e-06	0.0	5.242710372792864e-05	1.807831163032022e-06	0.0	0.0	0.0	0.0	0.0	0.0001138933632710174	0.0	0.0	0.0	0.0	0.0	0.0	0.0	0.0	0.0	0.0
Y(346)	0.00017355179165107413	H:0.00017355179165107413	0.0	0.0	0.0	0.0	0.0	0.0	0.0	0.0	0.00017355179165107413	0.0	0.0	0.0	0.0	0.0	0.0	0.0	0.0	0.0	0.0	0.0
A(581)	0.00017355179165107413	V:6.327409070612077e-05 , S:2.711746744548033e-05 , T:8.316023349947302e-05	0.0	0.0	6.327409070612077e-05	2.711746744548033e-05	0.0	0.0	0.0	0.0	0.0	8.316023349947302e-05	0.0	0.0	0.0	0.0	0.0	0.0	0.0	0.0	0.0	0.0
E(350)	0.00017355179165107413	A:7.231324652128088e-06 , G:0.00015185781769468985 , D:1.4462649304256176e-05	0.0	0.0	0.0	0.0	0.0	0.0	0.0	0.0	0.0	0.0	7.231324652128088e-06	0.00015185781769468985	1.4462649304256176e-05	0.0	0.0	0.0	0.0	0.0	0.0	0.0
T(51)	0.0001717439604880421	I:0.0001138933632710174 , N:5.6042766053992684e-05 , A:1.807831163032022e-06	0.0	0.0001138933632710174	0.0	0.0	0.0	0.0	0.0	5.6042766053992684e-05	0.0	0.0	1.807831163032022e-06	0.0	0.0	0.0	0.0	0.0	0.0	0.0	0.0	0.0
N(734)	0.00016993612932501007	S:6.146625954308875e-05 , Y:2.8925298608512352e-05 , T:3.615662326064044e-06 , D:7.592890884734493e-05	0.0	0.0	0.0	6.146625954308875e-05	0.0	0.0	2.8925298608512352e-05	0.0	0.0	3.615662326064044e-06	0.0	0.0	7.592890884734493e-05	0.0	0.0	0.0	0.0	0.0	0.0	0.0
A(699)	0.00016812829816197804	V:1.807831163032022e-06 , S:0.00016451263583591402 , T:1.807831163032022e-06	0.0	0.0	1.807831163032022e-06	0.00016451263583591402	0.0	0.0	0.0	0.0	0.0	1.807831163032022e-06	0.0	0.0	0.0	0.0	0.0	0.0	0.0	0.0	0.0	0.0
S(434)	0.00016812829816197804	F:0.0001066620386188893 , Y:4.338794791276853e-05 , P:1.807831163032022e-05	0.0	0.0	0.0	0.0	0.0001066620386188893	0.0	4.338794791276853e-05	0.0	0.0	0.0	0.0	0.0	0.0	0.0	0.0	0.0	0.0	0.0	1.807831163032022e-05	0.0
A(43)	0.00016451263583591402	V:9.219938931463313e-05 , S:5.7850597217024705e-05 , T:9.03915581516011e-06 , D:5.4234934890960665e-06	0.0	0.0	9.219938931463313e-05	5.7850597217024705e-05	0.0	0.0	0.0	0.0	0.0	9.03915581516011e-06	0.0	0.0	5.4234934890960665e-06	0.0	0.0	0.0	0.0	0.0	0.0	0.0
I(145)	0.00016451263583591402	L:7.231324652128088e-06 , V:0.00010123854512979324 , T:9.03915581516011e-06 , M:4.700361023883257e-05	7.231324652128088e-06	0.0	0.00010123854512979324	0.0	0.0	0.0	0.0	0.0	0.0	9.03915581516011e-06	0.0	0.0	0.0	0.0	4.700361023883257e-05	0.0	0.0	0.0	0.0	0.0
A(554)	0.00015908914234681793	V:6.146625954308875e-05 , S:1.4462649304256176e-05 , T:8.1352402336441e-05 , P:1.807831163032022e-06	0.0	0.0	6.146625954308875e-05	1.4462649304256176e-05	0.0	0.0	0.0	0.0	0.0	8.1352402336441e-05	0.0	0.0	0.0	0.0	0.0	0.0	0.0	0.0	1.807831163032022e-06	0.0
I(106)	0.00015908914234681793	L:7.231324652128088e-06 , V:7.231324652128088e-05 , T:9.03915581516011e-06 , M:7.050541535824886e-05	7.231324652128088e-06	0.0	7.231324652128088e-05	0.0	0.0	0.0	0.0	0.0	0.0	9.03915581516011e-06	0.0	0.0	0.0	0.0	7.050541535824886e-05	0.0	0.0	0.0	0.0	0.0
C(464)	0.00015728131118378593	S:5.4234934890960665e-06 , F:0.00013558733722740166 , Y:1.62704804672882e-05	0.0	0.0	0.0	5.4234934890960665e-06	0.00013558733722740166	0.0	1.62704804672882e-05	0.0	0.0	0.0	0.0	0.0	0.0	0.0	0.0	0.0	0.0	0.0	0.0	0.0
H(355)	0.00015728131118378593	L:3.615662326064044e-06 , Y:0.00015004998653165782 , N:3.615662326064044e-06	3.615662326064044e-06	0.0	0.0	0.0	0.0	0.0	0.00015004998653165782	3.615662326064044e-06	0.0	0.0	0.0	0.0	0.0	0.0	0.0	0.0	0.0	0.0	0.0	0.0
T(912)	0.0001554734800207539	I:0.0001410108307164977 , N:1.2654818141224155e-05 , A:1.807831163032022e-06	0.0	0.0001410108307164977	0.0	0.0	0.0	0.0	0.0	1.2654818141224155e-05	0.0	0.0	1.807831163032022e-06	0.0	0.0	0.0	0.0	0.0	0.0	0.0	0.0	0.0
L(630)	0.0001554734800207539	F:0.00015185781769468985 , H:3.615662326064044e-06	0.0	0.0	0.0	0.0	0.00015185781769468985	0.0	0.0	0.0	3.615662326064044e-06	0.0	0.0	0.0	0.0	0.0	0.0	0.0	0.0	0.0	0.0	0.0
Q(292)	0.0001554734800207539	L:3.615662326064044e-06 , H:0.00015185781769468985	3.615662326064044e-06	0.0	0.0	0.0	0.0	0.0	0.0	0.0	0.00015185781769468985	0.0	0.0	0.0	0.0	0.0	0.0	0.0	0.0	0.0	0.0	0.0
D(155)	0.00015185781769468985	V:1.807831163032022e-06 , N:1.807831163032022e-06 , A:5.4234934890960665e-06 , G:4.8811441401864594e-05 , E:9.400722047766515e-05	0.0	0.0	1.807831163032022e-06	0.0	0.0	0.0	0.0	1.807831163032022e-06	0.0	0.0	5.4234934890960665e-06	4.8811441401864594e-05	0.0	0.0	0.0	9.400722047766515e-05	0.0	0.0	0.0	0.0
Q(932)	0.00015185781769468985	H:0.0001464343242055938	0.0	0.0	0.0	0.0	0.0	0.0	0.0	0.0	0.0001464343242055938	0.0	0.0	0.0	0.0	0.0	0.0	0.0	0.0	0.0	0.0	0.0
V(338)	0.00015004998653165782	I:0.0001392029995534657 , F:1.0846986978192133e-05	0.0	0.0001392029995534657	0.0	0.0	1.0846986978192133e-05	0.0	0.0	0.0	0.0	0.0	0.0	0.0	0.0	0.0	0.0	0.0	0.0	0.0	0.0	0.0
V(190)	0.00014462649304256177	L:9.03915581516011e-06 , I:0.00012835601257527357 , A:7.231324652128088e-06	9.03915581516011e-06	0.00012835601257527357	0.0	0.0	0.0	0.0	0.0	0.0	0.0	0.0	7.231324652128088e-06	0.0	0.0	0.0	0.0	0.0	0.0	0.0	0.0	0.0
S(649)	0.00014281866187952974	L:8.677589582553706e-05 , P:5.6042766053992684e-05	8.677589582553706e-05	0.0	0.0	0.0	0.0	0.0	0.0	0.0	0.0	0.0	0.0	0.0	0.0	0.0	0.0	0.0	0.0	0.0	5.6042766053992684e-05	0.0
D(418)	0.00014281866187952974	Y:1.807831163032022e-06 , N:4.338794791276853e-05 , H:1.807831163032022e-06 , A:2.3501805119416287e-05 , G:7.231324652128088e-06 , E:6.50819218691528e-05	0.0	0.0	0.0	0.0	0.0	0.0	1.807831163032022e-06	4.338794791276853e-05	1.807831163032022e-06	0.0	2.3501805119416287e-05	7.231324652128088e-06	0.0	0.0	0.0	6.50819218691528e-05	0.0	0.0	0.0	0.0
S(772)	0.0001410108307164977	F:5.6042766053992684e-05 , Y:3.073312977154437e-05 , T:1.807831163032022e-06 , A:5.061927256489662e-05 , P:1.807831163032022e-06	0.0	0.0	0.0	0.0	5.6042766053992684e-05	0.0	3.073312977154437e-05	0.0	0.0	1.807831163032022e-06	5.061927256489662e-05	0.0	0.0	0.0	0.0	0.0	0.0	0.0	1.807831163032022e-06	0.0
F(334)	0.0001410108307164977	L:1.0846986978192133e-05 , I:5.4234934890960665e-06 , S:1.807831163032022e-06 , C:0.00011931685676011346 , Y:3.615662326064044e-06	1.0846986978192133e-05	5.4234934890960665e-06	0.0	1.807831163032022e-06	0.0	0.00011931685676011346	3.615662326064044e-06	0.0	0.0	0.0	0.0	0.0	0.0	0.0	0.0	0.0	0.0	0.0	0.0	0.0
R(583)	0.0001392029995534657	I:3.615662326064044e-06 , S:1.807831163032022e-06 , T:1.807831163032022e-06 , G:8.677589582553706e-05 , K:4.519577907580055e-05	0.0	3.615662326064044e-06	0.0	1.807831163032022e-06	0.0	0.0	0.0	0.0	0.0	1.807831163032022e-06	0.0	8.677589582553706e-05	0.0	0.0	0.0	0.0	4.519577907580055e-05	0.0	0.0	0.0
T(225)	0.0001392029995534657	I:0.0001138933632710174 , N:1.0846986978192133e-05 , A:1.4462649304256176e-05	0.0	0.0001138933632710174	0.0	0.0	0.0	0.0	0.0	1.0846986978192133e-05	0.0	0.0	1.4462649304256176e-05	0.0	0.0	0.0	0.0	0.0	0.0	0.0	0.0	0.0
V(700)	0.00013739516839043369	L:1.807831163032022e-06 , I:0.00012112468792314548 , A:1.4462649304256176e-05	1.807831163032022e-06	0.00012112468792314548	0.0	0.0	0.0	0.0	0.0	0.0	0.0	0.0	1.4462649304256176e-05	0.0	0.0	0.0	0.0	0.0	0.0	0.0	0.0	0.0
S(325)	0.00013558733722740166	I:0.0001229325190861775 , C:1.807831163032022e-06 , G:9.03915581516011e-06 , R:1.807831163032022e-06	0.0	0.0001229325190861775	0.0	0.0	0.0	1.807831163032022e-06	0.0	0.0	0.0	0.0	0.0	9.03915581516011e-06	0.0	1.807831163032022e-06	0.0	0.0	0.0	0.0	0.0	0.0
V(742)	0.00013558733722740166	L:4.700361023883257e-05 , A:7.231324652128088e-05 , G:1.2654818141224155e-05 , M:3.615662326064044e-06	4.700361023883257e-05	0.0	0.0	0.0	0.0	0.0	0.0	0.0	0.0	0.0	7.231324652128088e-05	1.2654818141224155e-05	0.0	0.0	3.615662326064044e-06	0.0	0.0	0.0	0.0	0.0
T(252)	0.00013558733722740166	I:8.677589582553706e-05 , S:1.807831163032022e-06 , N:4.338794791276853e-05 , A:3.615662326064044e-06	0.0	8.677589582553706e-05	0.0	1.807831163032022e-06	0.0	0.0	0.0	4.338794791276853e-05	0.0	0.0	3.615662326064044e-06	0.0	0.0	0.0	0.0	0.0	0.0	0.0	0.0	0.0
S(795)	0.00013558733722740166	L:7.231324652128088e-06 , F:0.00011750902559708144 , C:9.03915581516011e-06 , P:1.807831163032022e-06	7.231324652128088e-06	0.0	0.0	0.0	0.00011750902559708144	9.03915581516011e-06	0.0	0.0	0.0	0.0	0.0	0.0	0.0	0.0	0.0	0.0	0.0	0.0	1.807831163032022e-06	0.0
D(170)	0.00013558733722740166	V:5.4234934890960665e-06 , Y:4.158011674973651e-05 , N:3.615662326064044e-06 , G:7.592890884734493e-05 , E:9.03915581516011e-06	0.0	0.0	5.4234934890960665e-06	0.0	0.0	0.0	4.158011674973651e-05	3.615662326064044e-06	0.0	0.0	0.0	7.592890884734493e-05	0.0	0.0	0.0	9.03915581516011e-06	0.0	0.0	0.0	0.0
P(169)	0.00013558733722740166	L:1.2654818141224155e-05 , S:0.00010846986978192133 , T:5.4234934890960665e-06 , Q:9.03915581516011e-06	1.2654818141224155e-05	0.0	0.0	0.00010846986978192133	0.0	0.0	0.0	0.0	0.0	5.4234934890960665e-06	0.0	0.0	0.0	0.0	0.0	0.0	0.0	9.03915581516011e-06	0.0	0.0
T(801)	0.00013377950606436963	I:9.219938931463313e-05 , S:7.231324652128088e-06 , N:5.4234934890960665e-06 , A:2.8925298608512352e-05	0.0	9.219938931463313e-05	0.0	7.231324652128088e-06	0.0	0.0	0.0	5.4234934890960665e-06	0.0	0.0	2.8925298608512352e-05	0.0	0.0	0.0	0.0	0.0	0.0	0.0	0.0	0.0
D(269)	0.0001319716749013376	V:3.615662326064044e-06 , Y:3.615662326064044e-06 , N:3.615662326064044e-05 , A:5.4234934890960665e-06 , G:7.954457117340897e-05 , E:3.615662326064044e-06	0.0	0.0	3.615662326064044e-06	0.0	0.0	0.0	3.615662326064044e-06	3.615662326064044e-05	0.0	0.0	5.4234934890960665e-06	7.954457117340897e-05	0.0	0.0	0.0	3.615662326064044e-06	0.0	0.0	0.0	0.0
D(717)	0.0001319716749013376	Y:5.242710372792864e-05 , N:4.700361023883257e-05 , G:2.8925298608512352e-05 , E:3.615662326064044e-06	0.0	0.0	0.0	0.0	0.0	0.0	5.242710372792864e-05	4.700361023883257e-05	0.0	0.0	0.0	2.8925298608512352e-05	0.0	0.0	0.0	3.615662326064044e-06	0.0	0.0	0.0	0.0
V(315)	0.0001301638437383056	L:1.807831163032022e-06 , I:3.615662326064044e-06 , F:3.615662326064044e-06 , A:9.219938931463313e-05 , G:2.8925298608512352e-05	1.807831163032022e-06	3.615662326064044e-06	0.0	0.0	3.615662326064044e-06	0.0	0.0	0.0	0.0	0.0	9.219938931463313e-05	2.8925298608512352e-05	0.0	0.0	0.0	0.0	0.0	0.0	0.0	0.0
V(128)	0.0001301638437383056	I:0.00012112468792314548 , A:7.231324652128088e-06 , G:1.807831163032022e-06	0.0	0.00012112468792314548	0.0	0.0	0.0	0.0	0.0	0.0	0.0	0.0	7.231324652128088e-06	1.807831163032022e-06	0.0	0.0	0.0	0.0	0.0	0.0	0.0	0.0
D(154)	0.0001301638437383056	V:2.3501805119416287e-05 , Y:2.3501805119416287e-05 , N:2.530963628244831e-05 , A:2.1693973956384266e-05 , G:3.615662326064044e-05	0.0	0.0	2.3501805119416287e-05	0.0	0.0	0.0	2.3501805119416287e-05	2.530963628244831e-05	0.0	0.0	2.1693973956384266e-05	3.615662326064044e-05	0.0	0.0	0.0	0.0	0.0	0.0	0.0	0.0
S(520)	0.00012835601257527357	I:4.519577907580055e-05 , C:3.615662326064044e-06 , N:2.1693973956384266e-05 , G:5.423493489096066e-05 , R:1.807831163032022e-06 , K:1.807831163032022e-06	0.0	4.519577907580055e-05	0.0	0.0	0.0	3.615662326064044e-06	0.0	2.1693973956384266e-05	0.0	0.0	0.0	5.423493489096066e-05	0.0	1.807831163032022e-06	0.0	0.0	1.807831163032022e-06	0.0	0.0	0.0
S(607)	0.00012654818141224155	I:0.0001066620386188893 , C:1.807831163032022e-06 , N:1.4462649304256176e-05 , R:3.615662326064044e-06	0.0	0.0001066620386188893	0.0	0.0	0.0	1.807831163032022e-06	0.0	1.4462649304256176e-05	0.0	0.0	0.0	0.0	0.0	3.615662326064044e-06	0.0	0.0	0.0	0.0	0.0	0.0
H(75)	0.00012654818141224155	L:1.807831163032022e-06 , Y:6.869758419521684e-05 , N:3.615662326064044e-05 , D:1.807831163032022e-06 , Q:1.62704804672882e-05 , P:1.807831163032022e-06	1.807831163032022e-06	0.0	0.0	0.0	0.0	0.0	6.869758419521684e-05	3.615662326064044e-05	0.0	0.0	0.0	0.0	1.807831163032022e-06	0.0	0.0	0.0	0.0	1.62704804672882e-05	1.807831163032022e-06	0.0
R(457)	0.00012474035024920952	C:0.00011931685676011346 , H:5.4234934890960665e-06	0.0	0.0	0.0	0.0	0.0	0.00011931685676011346	0.0	0.0	5.4234934890960665e-06	0.0	0.0	0.0	0.0	0.0	0.0	0.0	0.0	0.0	0.0	0.0
K(263)	0.00012474035024920952	N:7.954457117340897e-05 , R:4.519577907580055e-05	0.0	0.0	0.0	0.0	0.0	0.0	0.0	7.954457117340897e-05	0.0	0.0	0.0	0.0	0.0	4.519577907580055e-05	0.0	0.0	0.0	0.0	0.0	0.0
D(304)	0.00012474035024920952	Y:0.00012112468792314548 , G:3.615662326064044e-06	0.0	0.0	0.0	0.0	0.0	0.0	0.00012112468792314548	0.0	0.0	0.0	0.0	3.615662326064044e-06	0.0	0.0	0.0	0.0	0.0	0.0	0.0	0.0
C(563)	0.00012474035024920952	S:1.807831163032022e-06 , F:0.0001229325190861775	0.0	0.0	0.0	1.807831163032022e-06	0.0001229325190861775	0.0	0.0	0.0	0.0	0.0	0.0	0.0	0.0	0.0	0.0	0.0	0.0	0.0	0.0	0.0
T(24)	0.0001229325190861775	I:8.1352402336441e-05 , S:3.615662326064044e-06 , A:3.796445442367246e-05	0.0	8.1352402336441e-05	0.0	3.615662326064044e-06	0.0	0.0	0.0	0.0	0.0	0.0	3.796445442367246e-05	0.0	0.0	0.0	0.0	0.0	0.0	0.0	0.0	0.0
D(824)	0.0001229325190861775	Y:5.423493489096066e-05 , N:1.0846986978192133e-05 , H:5.4234934890960665e-06 , A:1.0846986978192133e-05 , G:2.1693973956384266e-05 , E:1.9886142793352242e-05	0.0	0.0	0.0	0.0	0.0	0.0	5.423493489096066e-05	1.0846986978192133e-05	5.4234934890960665e-06	0.0	1.0846986978192133e-05	2.1693973956384266e-05	0.0	0.0	0.0	1.9886142793352242e-05	0.0	0.0	0.0	0.0
I(632)	0.0001229325190861775	L:1.807831163032022e-06 , V:0.00010485420745585728 , T:1.62704804672882e-05	1.807831163032022e-06	0.0	0.00010485420745585728	0.0	0.0	0.0	0.0	0.0	0.0	1.62704804672882e-05	0.0	0.0	0.0	0.0	0.0	0.0	0.0	0.0	0.0	0.0
P(21)	0.00012112468792314548	L:1.0846986978192133e-05 , S:0.00011027770094495335	1.0846986978192133e-05	0.0	0.0	0.00011027770094495335	0.0	0.0	0.0	0.0	0.0	0.0	0.0	0.0	0.0	0.0	0.0	0.0	0.0	0.0	0.0	0.0
F(77)	0.00011931685676011346	L:1.9886142793352242e-05 , V:2.3501805119416287e-05 , S:3.615662326064044e-06 , C:7.231324652128088e-05	1.9886142793352242e-05	0.0	2.3501805119416287e-05	3.615662326064044e-06	0.0	7.231324652128088e-05	0.0	0.0	0.0	0.0	0.0	0.0	0.0	0.0	0.0	0.0	0.0	0.0	0.0	0.0
M(906)	0.00011750902559708144	I:9.581505164069717e-05 , V:1.9886142793352242e-05 , K:1.807831163032022e-06	0.0	9.581505164069717e-05	1.9886142793352242e-05	0.0	0.0	0.0	0.0	0.0	0.0	0.0	0.0	0.0	0.0	0.0	0.0	0.0	1.807831163032022e-06	0.0	0.0	0.0
R(721)	0.00011570119443404941	L:5.4234934890960665e-06 , C:4.700361023883257e-05 , H:6.146625954308875e-05 , P:1.807831163032022e-06	5.4234934890960665e-06	0.0	0.0	0.0	0.0	4.700361023883257e-05	0.0	0.0	6.146625954308875e-05	0.0	0.0	0.0	0.0	0.0	0.0	0.0	0.0	0.0	1.807831163032022e-06	0.0
Y(156)	0.00011570119443404941	F:3.615662326064044e-06 , C:9.03915581516011e-06 , H:7.231324652128088e-06 , T:9.400722047766515e-05 , D:1.807831163032022e-06	0.0	0.0	0.0	0.0	3.615662326064044e-06	9.03915581516011e-06	0.0	0.0	7.231324652128088e-06	9.400722047766515e-05	0.0	0.0	1.807831163032022e-06	0.0	0.0	0.0	0.0	0.0	0.0	0.0
E(919)	0.0001138933632710174	L:1.807831163032022e-06 , G:1.9886142793352242e-05 , D:8.858372698856908e-05 , K:1.807831163032022e-06 , Q:1.807831163032022e-06	1.807831163032022e-06	0.0	0.0	0.0	0.0	0.0	0.0	0.0	0.0	0.0	0.0	1.9886142793352242e-05	8.858372698856908e-05	0.0	0.0	0.0	1.807831163032022e-06	1.807831163032022e-06	0.0	0.0
Q(224)	0.0001138933632710174	L:5.4234934890960665e-06 , H:5.4234934890960665e-06 , R:1.807831163032022e-05 , K:8.496806466250504e-05	5.4234934890960665e-06	0.0	0.0	0.0	0.0	0.0	0.0	0.0	5.4234934890960665e-06	0.0	0.0	0.0	0.0	1.807831163032022e-05	0.0	0.0	8.496806466250504e-05	0.0	0.0	0.0
L(127)	0.00011027770094495335	I:3.25409609345764e-05 , F:7.773674001037695e-05	0.0	3.25409609345764e-05	0.0	0.0	7.773674001037695e-05	0.0	0.0	0.0	0.0	0.0	0.0	0.0	0.0	0.0	0.0	0.0	0.0	0.0	0.0	0.0
A(771)	0.00011027770094495335	V:9.943071396676122e-05 , S:5.4234934890960665e-06 , T:5.4234934890960665e-06	0.0	0.0	9.943071396676122e-05	5.4234934890960665e-06	0.0	0.0	0.0	0.0	0.0	5.4234934890960665e-06	0.0	0.0	0.0	0.0	0.0	0.0	0.0	0.0	0.0	0.0
N(722)	0.00011027770094495335	S:5.4234934890960665e-06 , Y:3.073312977154437e-05 , H:2.711746744548033e-05 , T:2.8925298608512352e-05 , D:1.4462649304256176e-05 , K:3.615662326064044e-06	0.0	0.0	0.0	5.4234934890960665e-06	0.0	0.0	3.073312977154437e-05	0.0	2.711746744548033e-05	2.8925298608512352e-05	0.0	0.0	1.4462649304256176e-05	0.0	0.0	0.0	3.615662326064044e-06	0.0	0.0	0.0
V(166)	0.00011027770094495335	L:7.592890884734493e-05 , I:7.231324652128088e-06 , A:2.711746744548033e-05	7.592890884734493e-05	7.231324652128088e-06	0.0	0.0	0.0	0.0	0.0	0.0	0.0	0.0	2.711746744548033e-05	0.0	0.0	0.0	0.0	0.0	0.0	0.0	0.0	0.0
Y(163)	0.00011027770094495335	F:1.807831163032022e-06 , C:0.00010846986978192133	0.0	0.0	0.0	0.0	1.807831163032022e-06	0.00010846986978192133	0.0	0.0	0.0	0.0	0.0	0.0	0.0	0.0	0.0	0.0	0.0	0.0	0.0	0.0
E(522)	0.00011027770094495335	V:3.615662326064044e-06 , A:5.4234934890960665e-06 , G:1.4462649304256176e-05 , D:8.677589582553706e-05	0.0	0.0	3.615662326064044e-06	0.0	0.0	0.0	0.0	0.0	0.0	0.0	5.4234934890960665e-06	1.4462649304256176e-05	8.677589582553706e-05	0.0	0.0	0.0	0.0	0.0	0.0	0.0
S(367)	0.00011027770094495335	I:1.807831163032022e-06 , N:9.581505164069717e-05 , R:1.2654818141224155e-05	0.0	1.807831163032022e-06	0.0	0.0	0.0	0.0	0.0	9.581505164069717e-05	0.0	0.0	0.0	0.0	0.0	1.2654818141224155e-05	0.0	0.0	0.0	0.0	0.0	0.0
H(439)	0.00010846986978192133	Y:0.00010485420745585728 , Q:3.615662326064044e-06	0.0	0.0	0.0	0.0	0.0	0.0	0.00010485420745585728	0.0	0.0	0.0	0.0	0.0	0.0	0.0	0.0	0.0	0.0	3.615662326064044e-06	0.0	0.0
R(197)	0.0001066620386188893	L:1.807831163032022e-05 , Q:8.858372698856908e-05	1.807831163032022e-05	0.0	0.0	0.0	0.0	0.0	0.0	0.0	0.0	0.0	0.0	0.0	0.0	0.0	0.0	0.0	0.0	8.858372698856908e-05	0.0	0.0
A(878)	0.0001066620386188893	V:9.03915581516011e-05 , S:1.0846986978192133e-05 , T:3.615662326064044e-06 , P:1.807831163032022e-06	0.0	0.0	9.03915581516011e-05	1.0846986978192133e-05	0.0	0.0	0.0	0.0	0.0	3.615662326064044e-06	0.0	0.0	0.0	0.0	0.0	0.0	0.0	0.0	1.807831163032022e-06	0.0
A(625)	0.0001066620386188893	V:1.2654818141224155e-05 , S:9.03915581516011e-06 , T:8.496806466250504e-05	0.0	0.0	1.2654818141224155e-05	9.03915581516011e-06	0.0	0.0	0.0	0.0	0.0	8.496806466250504e-05	0.0	0.0	0.0	0.0	0.0	0.0	0.0	0.0	0.0	0.0
M(566)	0.00010485420745585728	I:0.00010485420745585728	0.0	0.00010485420745585728	0.0	0.0	0.0	0.0	0.0	0.0	0.0	0.0	0.0	0.0	0.0	0.0	0.0	0.0	0.0	0.0	0.0	0.0
Q(81)	0.00010485420745585728	L:2.3501805119416287e-05 , R:7.231324652128088e-06 , E:5.965842838005673e-05 , K:1.4462649304256176e-05	2.3501805119416287e-05	0.0	0.0	0.0	0.0	0.0	0.0	0.0	0.0	0.0	0.0	0.0	0.0	7.231324652128088e-06	0.0	5.965842838005673e-05	1.4462649304256176e-05	0.0	0.0	0.0
A(716)	0.00010485420745585728	V:4.8811441401864594e-05 , S:5.4234934890960665e-06 , T:4.8811441401864594e-05 , D:1.807831163032022e-06	0.0	0.0	4.8811441401864594e-05	5.4234934890960665e-06	0.0	0.0	0.0	0.0	0.0	4.8811441401864594e-05	0.0	0.0	1.807831163032022e-06	0.0	0.0	0.0	0.0	0.0	0.0	0.0
Y(149)	0.00010123854512979324	C:1.807831163032022e-06 , N:8.316023349947302e-05 , H:1.62704804672882e-05	0.0	0.0	0.0	0.0	0.0	1.807831163032022e-06	0.0	8.316023349947302e-05	1.62704804672882e-05	0.0	0.0	0.0	0.0	0.0	0.0	0.0	0.0	0.0	0.0	0.0
H(882)	9.943071396676122e-05	Y:9.03915581516011e-05 , N:1.807831163032022e-06 , R:7.231324652128088e-06	0.0	0.0	0.0	0.0	0.0	0.0	9.03915581516011e-05	1.807831163032022e-06	0.0	0.0	0.0	0.0	0.0	7.231324652128088e-06	0.0	0.0	0.0	0.0	0.0	0.0
H(928)	9.943071396676122e-05	L:1.9886142793352242e-05 , Y:6.869758419521684e-05 , R:5.4234934890960665e-06 , Q:3.615662326064044e-06 , P:1.807831163032022e-06	1.9886142793352242e-05	0.0	0.0	0.0	0.0	0.0	6.869758419521684e-05	0.0	0.0	0.0	0.0	0.0	0.0	5.4234934890960665e-06	0.0	0.0	0.0	3.615662326064044e-06	1.807831163032022e-06	0.0
E(61)	9.943071396676122e-05	V:1.0846986978192133e-05 , A:9.03915581516011e-06 , G:4.338794791276853e-05 , D:2.711746744548033e-05 , K:7.231324652128088e-06 , Q:1.807831163032022e-06	0.0	0.0	1.0846986978192133e-05	0.0	0.0	0.0	0.0	0.0	0.0	0.0	9.03915581516011e-06	4.338794791276853e-05	2.711746744548033e-05	0.0	0.0	0.0	7.231324652128088e-06	1.807831163032022e-06	0.0	0.0
L(805)	9.943071396676122e-05	I:3.9772285586704484e-05 , V:1.807831163032022e-06 , F:5.242710372792864e-05 , Q:3.615662326064044e-06 , P:1.807831163032022e-06	0.0	3.9772285586704484e-05	1.807831163032022e-06	0.0	5.242710372792864e-05	0.0	0.0	0.0	0.0	0.0	0.0	0.0	0.0	0.0	0.0	0.0	0.0	3.615662326064044e-06	1.807831163032022e-06	0.0
Y(877)	9.762288280372919e-05	F:1.807831163032022e-06 , C:9.581505164069717e-05	0.0	0.0	0.0	0.0	1.807831163032022e-06	9.581505164069717e-05	0.0	0.0	0.0	0.0	0.0	0.0	0.0	0.0	0.0	0.0	0.0	0.0	0.0	0.0
K(143)	9.581505164069717e-05	R:1.0846986978192133e-05 , E:9.03915581516011e-06 , Q:7.592890884734493e-05	0.0	0.0	0.0	0.0	0.0	0.0	0.0	0.0	0.0	0.0	0.0	0.0	0.0	1.0846986978192133e-05	0.0	9.03915581516011e-06	0.0	7.592890884734493e-05	0.0	0.0
V(609)	9.581505164069717e-05	I:9.581505164069717e-05	0.0	9.581505164069717e-05	0.0	0.0	0.0	0.0	0.0	0.0	0.0	0.0	0.0	0.0	0.0	0.0	0.0	0.0	0.0	0.0	0.0	0.0
P(328)	9.400722047766515e-05	S:7.412107768431291e-05 , T:1.9886142793352242e-05	0.0	0.0	0.0	7.412107768431291e-05	0.0	0.0	0.0	0.0	0.0	1.9886142793352242e-05	0.0	0.0	0.0	0.0	0.0	0.0	0.0	0.0	0.0	0.0
M(615)	9.400722047766515e-05	I:8.496806466250504e-05 , V:7.231324652128088e-06 , T:1.807831163032022e-06	0.0	8.496806466250504e-05	7.231324652128088e-06	0.0	0.0	0.0	0.0	0.0	0.0	1.807831163032022e-06	0.0	0.0	0.0	0.0	0.0	0.0	0.0	0.0	0.0	0.0
K(807)	9.400722047766515e-05	I:1.807831163032022e-06 , N:1.9886142793352242e-05 , R:2.3501805119416287e-05 , E:4.8811441401864594e-05	0.0	1.807831163032022e-06	0.0	0.0	0.0	0.0	0.0	1.9886142793352242e-05	0.0	0.0	0.0	0.0	0.0	2.3501805119416287e-05	0.0	4.8811441401864594e-05	0.0	0.0	0.0	0.0
A(176)	9.219938931463313e-05	V:1.9886142793352242e-05 , S:3.615662326064044e-06 , T:6.50819218691528e-05 , D:3.615662326064044e-06	0.0	0.0	1.9886142793352242e-05	3.615662326064044e-06	0.0	0.0	0.0	0.0	0.0	6.50819218691528e-05	0.0	0.0	3.615662326064044e-06	0.0	0.0	0.0	0.0	0.0	0.0	0.0
Y(175)	9.219938931463313e-05	F:1.807831163032022e-06 , H:9.03915581516011e-05	0.0	0.0	0.0	0.0	1.807831163032022e-06	0.0	0.0	0.0	9.03915581516011e-05	0.0	0.0	0.0	0.0	0.0	0.0	0.0	0.0	0.0	0.0	0.0
S(768)	9.219938931463313e-05	I:4.338794791276853e-05 , N:2.3501805119416287e-05 , T:7.231324652128088e-06 , G:1.2654818141224155e-05 , R:5.4234934890960665e-06	0.0	4.338794791276853e-05	0.0	0.0	0.0	0.0	0.0	2.3501805119416287e-05	0.0	7.231324652128088e-06	0.0	1.2654818141224155e-05	0.0	5.4234934890960665e-06	0.0	0.0	0.0	0.0	0.0	0.0
R(181)	9.03915581516011e-05	L:3.796445442367246e-05 , C:2.8925298608512352e-05 , Y:1.807831163032022e-06 , H:2.1693973956384266e-05	3.796445442367246e-05	0.0	0.0	0.0	0.0	2.8925298608512352e-05	1.807831163032022e-06	0.0	2.1693973956384266e-05	0.0	0.0	0.0	0.0	0.0	0.0	0.0	0.0	0.0	0.0	0.0
Q(492)	9.03915581516011e-05	L:4.519577907580055e-05 , H:1.2654818141224155e-05 , R:3.615662326064044e-06 , K:2.8925298608512352e-05	4.519577907580055e-05	0.0	0.0	0.0	0.0	0.0	0.0	0.0	1.2654818141224155e-05	0.0	0.0	0.0	0.0	3.615662326064044e-06	0.0	0.0	2.8925298608512352e-05	0.0	0.0	0.0
P(927)	9.03915581516011e-05	L:7.231324652128088e-06 , S:6.327409070612077e-05 , T:5.4234934890960665e-06 , Q:1.4462649304256176e-05	7.231324652128088e-06	0.0	0.0	6.327409070612077e-05	0.0	0.0	0.0	0.0	0.0	5.4234934890960665e-06	0.0	0.0	0.0	0.0	0.0	0.0	0.0	1.4462649304256176e-05	0.0	0.0
D(740)	9.03915581516011e-05	Y:1.807831163032022e-05 , N:3.073312977154437e-05 , A:3.615662326064044e-06 , G:1.0846986978192133e-05 , E:2.711746744548033e-05	0.0	0.0	0.0	0.0	0.0	0.0	1.807831163032022e-05	3.073312977154437e-05	0.0	0.0	3.615662326064044e-06	1.0846986978192133e-05	0.0	0.0	0.0	2.711746744548033e-05	0.0	0.0	0.0	0.0
N(611)	9.03915581516011e-05	S:7.231324652128088e-05 , H:1.62704804672882e-05 , D:1.807831163032022e-06	0.0	0.0	0.0	7.231324652128088e-05	0.0	0.0	0.0	0.0	1.62704804672882e-05	0.0	0.0	0.0	1.807831163032022e-06	0.0	0.0	0.0	0.0	0.0	0.0	0.0
D(523)	8.858372698856908e-05	Y:5.4234934890960665e-06 , N:1.62704804672882e-05 , H:1.807831163032022e-06 , A:1.807831163032022e-06 , G:6.327409070612077e-05	0.0	0.0	0.0	0.0	0.0	0.0	5.4234934890960665e-06	1.62704804672882e-05	1.807831163032022e-06	0.0	1.807831163032022e-06	6.327409070612077e-05	0.0	0.0	0.0	0.0	0.0	0.0	0.0	0.0
D(40)	8.858372698856908e-05	Y:3.615662326064044e-06 , N:5.061927256489662e-05 , A:1.2654818141224155e-05 , G:2.1693973956384266e-05	0.0	0.0	0.0	0.0	0.0	0.0	3.615662326064044e-06	5.061927256489662e-05	0.0	0.0	1.2654818141224155e-05	2.1693973956384266e-05	0.0	0.0	0.0	0.0	0.0	0.0	0.0	0.0
L(869)	8.858372698856908e-05	F:8.677589582553706e-05 , R:1.807831163032022e-06	0.0	0.0	0.0	0.0	8.677589582553706e-05	0.0	0.0	0.0	0.0	0.0	0.0	0.0	0.0	1.807831163032022e-06	0.0	0.0	0.0	0.0	0.0	0.0
N(177)	8.858372698856908e-05	Y:1.807831163032022e-06 , T:9.03915581516011e-06 , D:5.7850597217024705e-05 , K:1.9886142793352242e-05	0.0	0.0	0.0	0.0	0.0	0.0	1.807831163032022e-06	0.0	0.0	9.03915581516011e-06	0.0	0.0	5.7850597217024705e-05	0.0	0.0	0.0	1.9886142793352242e-05	0.0	0.0	0.0
A(702)	8.858372698856908e-05	S:8.858372698856908e-05	0.0	0.0	0.0	8.858372698856908e-05	0.0	0.0	0.0	0.0	0.0	0.0	0.0	0.0	0.0	0.0	0.0	0.0	0.0	0.0	0.0	0.0
I(847)	8.677589582553706e-05	V:8.677589582553706e-05	0.0	0.0	8.677589582553706e-05	0.0	0.0	0.0	0.0	0.0	0.0	0.0	0.0	0.0	0.0	0.0	0.0	0.0	0.0	0.0	0.0	0.0
I(579)	8.677589582553706e-05	L:4.338794791276853e-05 , V:2.711746744548033e-05 , T:1.807831163032022e-06 , M:1.4462649304256176e-05	4.338794791276853e-05	0.0	2.711746744548033e-05	0.0	0.0	0.0	0.0	0.0	0.0	1.807831163032022e-06	0.0	0.0	0.0	0.0	1.4462649304256176e-05	0.0	0.0	0.0	0.0	0.0
R(533)	8.677589582553706e-05	L:9.03915581516011e-06 , C:5.965842838005673e-05 , H:1.807831163032022e-05	9.03915581516011e-06	0.0	0.0	0.0	0.0	5.965842838005673e-05	0.0	0.0	1.807831163032022e-05	0.0	0.0	0.0	0.0	0.0	0.0	0.0	0.0	0.0	0.0	0.0
A(400)	8.496806466250504e-05	V:1.807831163032022e-06 , S:2.1693973956384266e-05 , T:6.146625954308875e-05	0.0	0.0	1.807831163032022e-06	2.1693973956384266e-05	0.0	0.0	0.0	0.0	0.0	6.146625954308875e-05	0.0	0.0	0.0	0.0	0.0	0.0	0.0	0.0	0.0	0.0
S(78)	8.496806466250504e-05	F:4.519577907580055e-05 , T:2.8925298608512352e-05 , A:3.615662326064044e-06 , P:7.231324652128088e-06	0.0	0.0	0.0	0.0	4.519577907580055e-05	0.0	0.0	0.0	0.0	2.8925298608512352e-05	3.615662326064044e-06	0.0	0.0	0.0	0.0	0.0	0.0	0.0	7.231324652128088e-06	0.0
P(873)	8.496806466250504e-05	S:5.242710372792864e-05 , N:1.807831163032022e-06 , H:1.2654818141224155e-05 , T:1.807831163032022e-05	0.0	0.0	0.0	5.242710372792864e-05	0.0	0.0	0.0	1.807831163032022e-06	1.2654818141224155e-05	1.807831163032022e-05	0.0	0.0	0.0	0.0	0.0	0.0	0.0	0.0	0.0	0.0
K(426)	8.1352402336441e-05	N:4.519577907580055e-05 , R:3.25409609345764e-05 , M:3.615662326064044e-06	0.0	0.0	0.0	0.0	0.0	0.0	0.0	4.519577907580055e-05	0.0	0.0	0.0	0.0	0.0	3.25409609345764e-05	3.615662326064044e-06	0.0	0.0	0.0	0.0	0.0
H(256)	8.1352402336441e-05	L:1.807831163032022e-06 , Y:7.050541535824886e-05 , R:9.03915581516011e-06	1.807831163032022e-06	0.0	0.0	0.0	0.0	0.0	7.050541535824886e-05	0.0	0.0	0.0	0.0	0.0	0.0	9.03915581516011e-06	0.0	0.0	0.0	0.0	0.0	0.0
D(303)	8.1352402336441e-05	Y:9.03915581516011e-06 , N:3.796445442367246e-05 , H:1.807831163032022e-06 , A:1.807831163032022e-06 , G:2.1693973956384266e-05 , E:9.03915581516011e-06	0.0	0.0	0.0	0.0	0.0	0.0	9.03915581516011e-06	3.796445442367246e-05	1.807831163032022e-06	0.0	1.807831163032022e-06	2.1693973956384266e-05	0.0	0.0	0.0	9.03915581516011e-06	0.0	0.0	0.0	0.0
Y(80)	8.1352402336441e-05	C:3.615662326064044e-06 , N:7.231324652128088e-06 , H:7.050541535824886e-05	0.0	0.0	0.0	0.0	0.0	3.615662326064044e-06	0.0	7.231324652128088e-06	7.050541535824886e-05	0.0	0.0	0.0	0.0	0.0	0.0	0.0	0.0	0.0	0.0	0.0
A(639)	7.954457117340897e-05	V:3.073312977154437e-05 , S:4.338794791276853e-05 , T:5.4234934890960665e-06	0.0	0.0	3.073312977154437e-05	4.338794791276853e-05	0.0	0.0	0.0	0.0	0.0	5.4234934890960665e-06	0.0	0.0	0.0	0.0	0.0	0.0	0.0	0.0	0.0	0.0
M(818)	7.954457117340897e-05	L:3.796445442367246e-05 , I:3.615662326064044e-05 , V:3.615662326064044e-06 , K:1.807831163032022e-06	3.796445442367246e-05	3.615662326064044e-05	3.615662326064044e-06	0.0	0.0	0.0	0.0	0.0	0.0	0.0	0.0	0.0	0.0	0.0	0.0	0.0	1.807831163032022e-06	0.0	0.0	0.0
Y(289)	7.954457117340897e-05	C:7.231324652128088e-06 , H:7.231324652128088e-05	0.0	0.0	0.0	0.0	0.0	7.231324652128088e-06	0.0	0.0	7.231324652128088e-05	0.0	0.0	0.0	0.0	0.0	0.0	0.0	0.0	0.0	0.0	0.0
V(11)	7.954457117340897e-05	I:4.8811441401864594e-05 , A:2.711746744548033e-05 , G:3.615662326064044e-06	0.0	4.8811441401864594e-05	0.0	0.0	0.0	0.0	0.0	0.0	0.0	0.0	2.711746744548033e-05	3.615662326064044e-06	0.0	0.0	0.0	0.0	0.0	0.0	0.0	0.0
K(267)	7.773674001037695e-05	N:5.061927256489662e-05 , R:2.711746744548033e-05	0.0	0.0	0.0	0.0	0.0	0.0	0.0	5.061927256489662e-05	0.0	0.0	0.0	0.0	0.0	2.711746744548033e-05	0.0	0.0	0.0	0.0	0.0	0.0
S(778)	7.773674001037695e-05	C:1.807831163032022e-06 , N:7.592890884734493e-05	0.0	0.0	0.0	0.0	0.0	1.807831163032022e-06	0.0	7.592890884734493e-05	0.0	0.0	0.0	0.0	0.0	0.0	0.0	0.0	0.0	0.0	0.0	0.0
R(349)	7.773674001037695e-05	I:7.231324652128088e-06 , S:9.03915581516011e-06 , T:3.615662326064044e-06 , G:3.9772285586704484e-05 , K:1.807831163032022e-05	0.0	7.231324652128088e-06	0.0	9.03915581516011e-06	0.0	0.0	0.0	0.0	0.0	3.615662326064044e-06	0.0	3.9772285586704484e-05	0.0	0.0	0.0	0.0	1.807831163032022e-05	0.0	0.0	0.0
M(756)	7.592890884734493e-05	I:6.50819218691528e-05 , V:1.0846986978192133e-05	0.0	6.50819218691528e-05	1.0846986978192133e-05	0.0	0.0	0.0	0.0	0.0	0.0	0.0	0.0	0.0	0.0	0.0	0.0	0.0	0.0	0.0	0.0	0.0
L(90)	7.592890884734493e-05	I:9.03915581516011e-06 , F:6.688975303218482e-05	0.0	9.03915581516011e-06	0.0	0.0	6.688975303218482e-05	0.0	0.0	0.0	0.0	0.0	0.0	0.0	0.0	0.0	0.0	0.0	0.0	0.0	0.0	0.0
T(402)	7.592890884734493e-05	I:6.50819218691528e-05 , A:1.0846986978192133e-05	0.0	6.50819218691528e-05	0.0	0.0	0.0	0.0	0.0	0.0	0.0	0.0	1.0846986978192133e-05	0.0	0.0	0.0	0.0	0.0	0.0	0.0	0.0	0.0
T(148)	7.592890884734493e-05	I:6.688975303218482e-05 , A:7.231324652128088e-06 , K:1.807831163032022e-06	0.0	6.688975303218482e-05	0.0	0.0	0.0	0.0	0.0	0.0	0.0	0.0	7.231324652128088e-06	0.0	0.0	0.0	0.0	0.0	1.807831163032022e-06	0.0	0.0	0.0
S(68)	7.412107768431291e-05	F:6.869758419521684e-05 , Y:5.4234934890960665e-06	0.0	0.0	0.0	0.0	6.869758419521684e-05	0.0	5.4234934890960665e-06	0.0	0.0	0.0	0.0	0.0	0.0	0.0	0.0	0.0	0.0	0.0	0.0	0.0
Q(773)	7.412107768431291e-05	L:1.807831163032022e-06 , H:5.4234934890960665e-06 , R:5.7850597217024705e-05 , K:9.03915581516011e-06	1.807831163032022e-06	0.0	0.0	0.0	0.0	0.0	0.0	0.0	5.4234934890960665e-06	0.0	0.0	0.0	0.0	5.7850597217024705e-05	0.0	0.0	9.03915581516011e-06	0.0	0.0	0.0
Q(184)	7.412107768431291e-05	L:5.4234934890960665e-06 , H:1.2654818141224155e-05 , R:1.4462649304256176e-05 , K:4.158011674973651e-05	5.4234934890960665e-06	0.0	0.0	0.0	0.0	0.0	0.0	0.0	1.2654818141224155e-05	0.0	0.0	0.0	0.0	1.4462649304256176e-05	0.0	0.0	4.158011674973651e-05	0.0	0.0	0.0
D(63)	7.231324652128088e-05	Y:3.25409609345764e-05 , N:1.0846986978192133e-05 , H:9.03915581516011e-06 , G:1.62704804672882e-05 , E:3.615662326064044e-06	0.0	0.0	0.0	0.0	0.0	0.0	3.25409609345764e-05	1.0846986978192133e-05	9.03915581516011e-06	0.0	0.0	1.62704804672882e-05	0.0	0.0	0.0	3.615662326064044e-06	0.0	0.0	0.0	0.0
E(894)	7.231324652128088e-05	D:2.3501805119416287e-05 , K:4.8811441401864594e-05	0.0	0.0	0.0	0.0	0.0	0.0	0.0	0.0	0.0	0.0	0.0	0.0	2.3501805119416287e-05	0.0	0.0	0.0	4.8811441401864594e-05	0.0	0.0	0.0
V(472)	7.231324652128088e-05	L:6.327409070612077e-05 , I:9.03915581516011e-06	6.327409070612077e-05	9.03915581516011e-06	0.0	0.0	0.0	0.0	0.0	0.0	0.0	0.0	0.0	0.0	0.0	0.0	0.0	0.0	0.0	0.0	0.0	0.0
H(295)	7.231324652128088e-05	Y:7.231324652128088e-05	0.0	0.0	0.0	0.0	0.0	0.0	7.231324652128088e-05	0.0	0.0	0.0	0.0	0.0	0.0	0.0	0.0	0.0	0.0	0.0	0.0	0.0
D(421)	7.231324652128088e-05	Y:1.807831163032022e-05 , N:1.807831163032022e-05 , E:3.615662326064044e-05	0.0	0.0	0.0	0.0	0.0	0.0	1.807831163032022e-05	1.807831163032022e-05	0.0	0.0	0.0	0.0	0.0	0.0	0.0	3.615662326064044e-05	0.0	0.0	0.0	0.0
R(365)	7.050541535824886e-05	K:7.050541535824886e-05	0.0	0.0	0.0	0.0	0.0	0.0	0.0	0.0	0.0	0.0	0.0	0.0	0.0	0.0	0.0	0.0	7.050541535824886e-05	0.0	0.0	0.0
H(892)	7.050541535824886e-05	Y:6.146625954308875e-05 , N:3.615662326064044e-06 , R:5.4234934890960665e-06	0.0	0.0	0.0	0.0	0.0	0.0	6.146625954308875e-05	3.615662326064044e-06	0.0	0.0	0.0	0.0	0.0	5.4234934890960665e-06	0.0	0.0	0.0	0.0	0.0	0.0
N(138)	7.050541535824886e-05	S:9.03915581516011e-06 , H:1.4462649304256176e-05 , T:1.807831163032022e-06 , D:4.338794791276853e-05 , K:1.807831163032022e-06	0.0	0.0	0.0	9.03915581516011e-06	0.0	0.0	0.0	0.0	1.4462649304256176e-05	1.807831163032022e-06	0.0	0.0	4.338794791276853e-05	0.0	0.0	0.0	1.807831163032022e-06	0.0	0.0	0.0
R(914)	7.050541535824886e-05	S:2.8925298608512352e-05 , G:1.807831163032022e-06 , M:5.4234934890960665e-06 , K:3.434879209760842e-05	0.0	0.0	0.0	2.8925298608512352e-05	0.0	0.0	0.0	0.0	0.0	0.0	0.0	1.807831163032022e-06	0.0	0.0	5.4234934890960665e-06	0.0	3.434879209760842e-05	0.0	0.0	0.0
V(587)	7.050541535824886e-05	L:3.615662326064044e-05 , I:3.434879209760842e-05	3.615662326064044e-05	3.434879209760842e-05	0.0	0.0	0.0	0.0	0.0	0.0	0.0	0.0	0.0	0.0	0.0	0.0	0.0	0.0	0.0	0.0	0.0	0.0
V(675)	7.050541535824886e-05	I:4.8811441401864594e-05 , F:1.9886142793352242e-05 , R:1.807831163032022e-06	0.0	4.8811441401864594e-05	0.0	0.0	1.9886142793352242e-05	0.0	0.0	0.0	0.0	0.0	0.0	0.0	0.0	1.807831163032022e-06	0.0	0.0	0.0	0.0	0.0	0.0
D(358)	7.050541535824886e-05	Y:2.1693973956384266e-05 , N:5.4234934890960665e-06 , G:2.1693973956384266e-05 , E:2.1693973956384266e-05	0.0	0.0	0.0	0.0	0.0	0.0	2.1693973956384266e-05	5.4234934890960665e-06	0.0	0.0	0.0	2.1693973956384266e-05	0.0	0.0	0.0	2.1693973956384266e-05	0.0	0.0	0.0	0.0
H(362)	7.050541535824886e-05	L:1.807831163032022e-06 , Y:6.869758419521684e-05	1.807831163032022e-06	0.0	0.0	0.0	0.0	0.0	6.869758419521684e-05	0.0	0.0	0.0	0.0	0.0	0.0	0.0	0.0	0.0	0.0	0.0	0.0	0.0
L(240)	7.050541535824886e-05	V:5.4234934890960665e-06 , F:6.50819218691528e-05	0.0	0.0	5.4234934890960665e-06	0.0	6.50819218691528e-05	0.0	0.0	0.0	0.0	0.0	0.0	0.0	0.0	0.0	0.0	0.0	0.0	0.0	0.0	0.0
A(125)	7.050541535824886e-05	V:3.615662326064044e-06 , S:6.688975303218482e-05	0.0	0.0	3.615662326064044e-06	6.688975303218482e-05	0.0	0.0	0.0	0.0	0.0	0.0	0.0	0.0	0.0	0.0	0.0	0.0	0.0	0.0	0.0	0.0
T(769)	6.869758419521684e-05	I:4.8811441401864594e-05 , N:1.9886142793352242e-05	0.0	4.8811441401864594e-05	0.0	0.0	0.0	0.0	0.0	1.9886142793352242e-05	0.0	0.0	0.0	0.0	0.0	0.0	0.0	0.0	0.0	0.0	0.0	0.0
K(430)	6.869758419521684e-05	N:5.242710372792864e-05 , R:1.4462649304256176e-05 , M:1.807831163032022e-06	0.0	0.0	0.0	0.0	0.0	0.0	0.0	5.242710372792864e-05	0.0	0.0	0.0	0.0	0.0	1.4462649304256176e-05	1.807831163032022e-06	0.0	0.0	0.0	0.0	0.0
G(385)	6.869758419521684e-05	S:6.688975303218482e-05 , C:1.807831163032022e-06	0.0	0.0	0.0	6.688975303218482e-05	0.0	1.807831163032022e-06	0.0	0.0	0.0	0.0	0.0	0.0	0.0	0.0	0.0	0.0	0.0	0.0	0.0	0.0
V(341)	6.688975303218482e-05	L:3.615662326064044e-06 , I:3.615662326064044e-06 , A:5.965842838005673e-05	3.615662326064044e-06	3.615662326064044e-06	0.0	0.0	0.0	0.0	0.0	0.0	0.0	0.0	5.965842838005673e-05	0.0	0.0	0.0	0.0	0.0	0.0	0.0	0.0	0.0
V(373)	6.688975303218482e-05	L:6.146625954308875e-05 , A:5.4234934890960665e-06	6.146625954308875e-05	0.0	0.0	0.0	0.0	0.0	0.0	0.0	0.0	0.0	5.4234934890960665e-06	0.0	0.0	0.0	0.0	0.0	0.0	0.0	0.0	0.0
D(100)	6.50819218691528e-05	Y:3.615662326064044e-06 , E:6.146625954308875e-05	0.0	0.0	0.0	0.0	0.0	0.0	3.615662326064044e-06	0.0	0.0	0.0	0.0	0.0	0.0	0.0	0.0	6.146625954308875e-05	0.0	0.0	0.0	0.0
F(741)	6.50819218691528e-05	L:5.7850597217024705e-05 , V:3.615662326064044e-06 , S:3.615662326064044e-06	5.7850597217024705e-05	0.0	3.615662326064044e-06	3.615662326064044e-06	0.0	0.0	0.0	0.0	0.0	0.0	0.0	0.0	0.0	0.0	0.0	0.0	0.0	0.0	0.0	0.0
L(527)	6.327409070612077e-05	I:1.62704804672882e-05 , F:4.519577907580055e-05 , P:1.807831163032022e-06	0.0	1.62704804672882e-05	0.0	0.0	4.519577907580055e-05	0.0	0.0	0.0	0.0	0.0	0.0	0.0	0.0	0.0	0.0	0.0	0.0	0.0	1.807831163032022e-06	0.0
E(144)	6.327409070612077e-05	A:1.62704804672882e-05 , G:1.807831163032022e-06 , K:4.519577907580055e-05	0.0	0.0	0.0	0.0	0.0	0.0	0.0	0.0	0.0	0.0	1.62704804672882e-05	1.807831163032022e-06	0.0	0.0	0.0	0.0	4.519577907580055e-05	0.0	0.0	0.0
V(495)	6.327409070612077e-05	L:1.807831163032022e-06 , I:6.146625954308875e-05	1.807831163032022e-06	6.146625954308875e-05	0.0	0.0	0.0	0.0	0.0	0.0	0.0	0.0	0.0	0.0	0.0	0.0	0.0	0.0	0.0	0.0	0.0	0.0
H(572)	6.327409070612077e-05	L:1.807831163032022e-06 , S:1.807831163032022e-06 , F:3.615662326064044e-06 , Y:5.6042766053992684e-05	1.807831163032022e-06	0.0	0.0	1.807831163032022e-06	3.615662326064044e-06	0.0	5.6042766053992684e-05	0.0	0.0	0.0	0.0	0.0	0.0	0.0	0.0	0.0	0.0	0.0	0.0	0.0
T(344)	6.327409070612077e-05	I:3.9772285586704484e-05 , N:1.9886142793352242e-05 , A:3.615662326064044e-06	0.0	3.9772285586704484e-05	0.0	0.0	0.0	0.0	0.0	1.9886142793352242e-05	0.0	0.0	3.615662326064044e-06	0.0	0.0	0.0	0.0	0.0	0.0	0.0	0.0	0.0
A(383)	6.327409070612077e-05	V:3.9772285586704484e-05 , S:2.3501805119416287e-05	0.0	0.0	3.9772285586704484e-05	2.3501805119416287e-05	0.0	0.0	0.0	0.0	0.0	0.0	0.0	0.0	0.0	0.0	0.0	0.0	0.0	0.0	0.0	0.0
G(137)	6.327409070612077e-05	V:7.231324652128088e-06 , S:3.615662326064044e-06 , C:4.158011674973651e-05 , D:1.0846986978192133e-05	0.0	0.0	7.231324652128088e-06	3.615662326064044e-06	0.0	4.158011674973651e-05	0.0	0.0	0.0	0.0	0.0	0.0	1.0846986978192133e-05	0.0	0.0	0.0	0.0	0.0	0.0	0.0
L(247)	6.327409070612077e-05	S:3.615662326064044e-06 , F:5.965842838005673e-05	0.0	0.0	0.0	3.615662326064044e-06	5.965842838005673e-05	0.0	0.0	0.0	0.0	0.0	0.0	0.0	0.0	0.0	0.0	0.0	0.0	0.0	0.0	0.0
N(64)	6.146625954308875e-05	S:5.965842838005673e-05 , D:1.807831163032022e-06	0.0	0.0	0.0	5.965842838005673e-05	0.0	0.0	0.0	0.0	0.0	0.0	0.0	0.0	1.807831163032022e-06	0.0	0.0	0.0	0.0	0.0	0.0	0.0
T(582)	6.146625954308875e-05	I:5.242710372792864e-05 , N:5.4234934890960665e-06 , A:3.615662326064044e-06	0.0	5.242710372792864e-05	0.0	0.0	0.0	0.0	0.0	5.4234934890960665e-06	0.0	0.0	3.615662326064044e-06	0.0	0.0	0.0	0.0	0.0	0.0	0.0	0.0	0.0
P(232)	6.146625954308875e-05	S:5.965842838005673e-05 , T:1.807831163032022e-06	0.0	0.0	0.0	5.965842838005673e-05	0.0	0.0	0.0	0.0	0.0	1.807831163032022e-06	0.0	0.0	0.0	0.0	0.0	0.0	0.0	0.0	0.0	0.0
Y(265)	6.146625954308875e-05	C:3.615662326064044e-06 , H:5.7850597217024705e-05	0.0	0.0	0.0	0.0	0.0	3.615662326064044e-06	0.0	0.0	5.7850597217024705e-05	0.0	0.0	0.0	0.0	0.0	0.0	0.0	0.0	0.0	0.0	0.0
Y(606)	6.146625954308875e-05	C:5.7850597217024705e-05 , H:3.615662326064044e-06	0.0	0.0	0.0	0.0	0.0	5.7850597217024705e-05	0.0	0.0	3.615662326064044e-06	0.0	0.0	0.0	0.0	0.0	0.0	0.0	0.0	0.0	0.0	0.0
S(27)	5.965842838005673e-05	I:5.4234934890960665e-06 , C:1.4462649304256176e-05 , N:3.615662326064044e-05 , G:3.615662326064044e-06	0.0	5.4234934890960665e-06	0.0	0.0	0.0	1.4462649304256176e-05	0.0	3.615662326064044e-05	0.0	0.0	0.0	3.615662326064044e-06	0.0	0.0	0.0	0.0	0.0	0.0	0.0	0.0
N(911)	5.965842838005673e-05	S:2.1693973956384266e-05 , Y:1.807831163032022e-06 , T:3.615662326064044e-06 , D:1.62704804672882e-05 , K:1.62704804672882e-05	0.0	0.0	0.0	2.1693973956384266e-05	0.0	0.0	1.807831163032022e-06	0.0	0.0	3.615662326064044e-06	0.0	0.0	1.62704804672882e-05	0.0	0.0	0.0	1.62704804672882e-05	0.0	0.0	0.0
D(833)	5.965842838005673e-05	N:5.6042766053992684e-05 , H:1.807831163032022e-06 , E:1.807831163032022e-06	0.0	0.0	0.0	0.0	0.0	0.0	0.0	5.6042766053992684e-05	1.807831163032022e-06	0.0	0.0	0.0	0.0	0.0	0.0	1.807831163032022e-06	0.0	0.0	0.0	0.0
L(186)	5.965842838005673e-05	V:5.242710372792864e-05 , F:3.615662326064044e-06 , M:3.615662326064044e-06	0.0	0.0	5.242710372792864e-05	0.0	3.615662326064044e-06	0.0	0.0	0.0	0.0	0.0	0.0	0.0	0.0	0.0	3.615662326064044e-06	0.0	0.0	0.0	0.0	0.0
G(712)	5.965842838005673e-05	V:3.9772285586704484e-05 , S:3.615662326064044e-06 , C:3.615662326064044e-06 , A:1.2654818141224155e-05	0.0	0.0	3.9772285586704484e-05	3.615662326064044e-06	0.0	3.615662326064044e-06	0.0	0.0	0.0	0.0	1.2654818141224155e-05	0.0	0.0	0.0	0.0	0.0	0.0	0.0	0.0	0.0
M(794)	5.7850597217024705e-05	L:1.807831163032022e-06 , I:2.530963628244831e-05 , V:2.711746744548033e-05 , T:3.615662326064044e-06	1.807831163032022e-06	2.530963628244831e-05	2.711746744548033e-05	0.0	0.0	0.0	0.0	0.0	0.0	3.615662326064044e-06	0.0	0.0	0.0	0.0	0.0	0.0	0.0	0.0	0.0	0.0
Y(653)	5.7850597217024705e-05	F:4.158011674973651e-05 , H:1.62704804672882e-05	0.0	0.0	0.0	0.0	4.158011674973651e-05	0.0	0.0	0.0	1.62704804672882e-05	0.0	0.0	0.0	0.0	0.0	0.0	0.0	0.0	0.0	0.0	0.0
D(910)	5.6042766053992684e-05	V:3.615662326064044e-06 , Y:1.807831163032022e-06 , N:9.03915581516011e-06 , A:3.615662326064044e-06 , G:3.796445442367246e-05	0.0	0.0	3.615662326064044e-06	0.0	0.0	0.0	1.807831163032022e-06	9.03915581516011e-06	0.0	0.0	3.615662326064044e-06	3.796445442367246e-05	0.0	0.0	0.0	0.0	0.0	0.0	0.0	0.0
A(547)	5.6042766053992684e-05	V:5.242710372792864e-05 , T:3.615662326064044e-06	0.0	0.0	5.242710372792864e-05	0.0	0.0	0.0	0.0	0.0	0.0	3.615662326064044e-06	0.0	0.0	0.0	0.0	0.0	0.0	0.0	0.0	0.0	0.0
V(182)	5.6042766053992684e-05	L:7.231324652128088e-06 , I:4.519577907580055e-05 , T:1.807831163032022e-06 , A:1.807831163032022e-06	7.231324652128088e-06	4.519577907580055e-05	0.0	0.0	0.0	0.0	0.0	0.0	0.0	1.807831163032022e-06	1.807831163032022e-06	0.0	0.0	0.0	0.0	0.0	0.0	0.0	0.0	0.0
V(147)	5.6042766053992684e-05	I:1.807831163032022e-05 , S:1.807831163032022e-06 , F:3.615662326064044e-06 , A:1.807831163032022e-05 , G:1.4462649304256176e-05	0.0	1.807831163032022e-05	0.0	1.807831163032022e-06	3.615662326064044e-06	0.0	0.0	0.0	0.0	0.0	1.807831163032022e-05	1.4462649304256176e-05	0.0	0.0	0.0	0.0	0.0	0.0	0.0	0.0
I(488)	5.6042766053992684e-05	L:9.03915581516011e-06 , V:3.9772285586704484e-05 , S:3.615662326064044e-06 , T:3.615662326064044e-06	9.03915581516011e-06	0.0	3.9772285586704484e-05	3.615662326064044e-06	0.0	0.0	0.0	0.0	0.0	3.615662326064044e-06	0.0	0.0	0.0	0.0	0.0	0.0	0.0	0.0	0.0	0.0
S(1)	5.6042766053992684e-05	L:4.8811441401864594e-05 , A:5.4234934890960665e-06 , P:1.807831163032022e-06	4.8811441401864594e-05	0.0	0.0	0.0	0.0	0.0	0.0	0.0	0.0	0.0	5.4234934890960665e-06	0.0	0.0	0.0	0.0	0.0	0.0	0.0	1.807831163032022e-06	0.0
V(71)	5.423493489096066e-05	L:3.615662326064044e-06 , I:5.061927256489662e-05	3.615662326064044e-06	5.061927256489662e-05	0.0	0.0	0.0	0.0	0.0	0.0	0.0	0.0	0.0	0.0	0.0	0.0	0.0	0.0	0.0	0.0	0.0	0.0
D(711)	5.423493489096066e-05	Y:1.0846986978192133e-05 , N:1.0846986978192133e-05 , A:1.807831163032022e-06 , G:3.073312977154437e-05	0.0	0.0	0.0	0.0	0.0	0.0	1.0846986978192133e-05	1.0846986978192133e-05	0.0	0.0	1.807831163032022e-06	3.073312977154437e-05	0.0	0.0	0.0	0.0	0.0	0.0	0.0	0.0
N(213)	5.423493489096066e-05	S:1.4462649304256176e-05 , T:5.4234934890960665e-06 , D:2.530963628244831e-05 , K:9.03915581516011e-06	0.0	0.0	0.0	1.4462649304256176e-05	0.0	0.0	0.0	0.0	0.0	5.4234934890960665e-06	0.0	0.0	2.530963628244831e-05	0.0	0.0	0.0	9.03915581516011e-06	0.0	0.0	0.0
I(562)	5.423493489096066e-05	L:2.1693973956384266e-05 , V:3.25409609345764e-05	2.1693973956384266e-05	0.0	3.25409609345764e-05	0.0	0.0	0.0	0.0	0.0	0.0	0.0	0.0	0.0	0.0	0.0	0.0	0.0	0.0	0.0	0.0	0.0
K(369)	5.242710372792864e-05	N:1.62704804672882e-05 , R:3.615662326064044e-05	0.0	0.0	0.0	0.0	0.0	0.0	0.0	1.62704804672882e-05	0.0	0.0	0.0	0.0	0.0	3.615662326064044e-05	0.0	0.0	0.0	0.0	0.0	0.0
V(930)	5.242710372792864e-05	I:5.061927256489662e-05 , A:1.807831163032022e-06	0.0	5.061927256489662e-05	0.0	0.0	0.0	0.0	0.0	0.0	0.0	0.0	1.807831163032022e-06	0.0	0.0	0.0	0.0	0.0	0.0	0.0	0.0	0.0
T(850)	5.242710372792864e-05	I:3.615662326064044e-06 , A:4.8811441401864594e-05	0.0	3.615662326064044e-06	0.0	0.0	0.0	0.0	0.0	0.0	0.0	0.0	4.8811441401864594e-05	0.0	0.0	0.0	0.0	0.0	0.0	0.0	0.0	0.0
K(821)	5.242710372792864e-05	T:9.03915581516011e-06 , R:4.338794791276853e-05	0.0	0.0	0.0	0.0	0.0	0.0	0.0	0.0	0.0	9.03915581516011e-06	0.0	0.0	0.0	4.338794791276853e-05	0.0	0.0	0.0	0.0	0.0	0.0
V(763)	5.242710372792864e-05	L:1.807831163032022e-06 , I:4.8811441401864594e-05 , F:1.807831163032022e-06	1.807831163032022e-06	4.8811441401864594e-05	0.0	0.0	1.807831163032022e-06	0.0	0.0	0.0	0.0	0.0	0.0	0.0	0.0	0.0	0.0	0.0	0.0	0.0	0.0	0.0
G(596)	5.242710372792864e-05	V:3.615662326064044e-06 , S:3.9772285586704484e-05 , C:9.03915581516011e-06	0.0	0.0	3.615662326064044e-06	3.9772285586704484e-05	0.0	9.03915581516011e-06	0.0	0.0	0.0	0.0	0.0	0.0	0.0	0.0	0.0	0.0	0.0	0.0	0.0	0.0
P(412)	5.242710372792864e-05	S:4.338794791276853e-05 , T:5.4234934890960665e-06 , A:3.615662326064044e-06	0.0	0.0	0.0	4.338794791276853e-05	0.0	0.0	0.0	0.0	0.0	5.4234934890960665e-06	3.615662326064044e-06	0.0	0.0	0.0	0.0	0.0	0.0	0.0	0.0	0.0
M(755)	5.061927256489662e-05	L:3.615662326064044e-06 , I:4.700361023883257e-05	3.615662326064044e-06	4.700361023883257e-05	0.0	0.0	0.0	0.0	0.0	0.0	0.0	0.0	0.0	0.0	0.0	0.0	0.0	0.0	0.0	0.0	0.0	0.0
H(816)	5.061927256489662e-05	L:1.807831163032022e-06 , Y:3.9772285586704484e-05 , R:9.03915581516011e-06	1.807831163032022e-06	0.0	0.0	0.0	0.0	0.0	3.9772285586704484e-05	0.0	0.0	0.0	0.0	0.0	0.0	9.03915581516011e-06	0.0	0.0	0.0	0.0	0.0	0.0
R(279)	5.061927256489662e-05	S:5.061927256489662e-05	0.0	0.0	0.0	5.061927256489662e-05	0.0	0.0	0.0	0.0	0.0	0.0	0.0	0.0	0.0	0.0	0.0	0.0	0.0	0.0	0.0	0.0
E(796)	5.061927256489662e-05	A:1.0846986978192133e-05 , G:1.2654818141224155e-05 , D:1.9886142793352242e-05 , R:7.231324652128088e-06	0.0	0.0	0.0	0.0	0.0	0.0	0.0	0.0	0.0	0.0	1.0846986978192133e-05	1.2654818141224155e-05	1.9886142793352242e-05	7.231324652128088e-06	0.0	0.0	0.0	0.0	0.0	0.0
T(393)	5.061927256489662e-05	I:2.3501805119416287e-05 , S:2.711746744548033e-05	0.0	2.3501805119416287e-05	0.0	2.711746744548033e-05	0.0	0.0	0.0	0.0	0.0	0.0	0.0	0.0	0.0	0.0	0.0	0.0	0.0	0.0	0.0	0.0
A(550)	5.061927256489662e-05	V:4.338794791276853e-05 , S:5.4234934890960665e-06 , E:1.807831163032022e-06	0.0	0.0	4.338794791276853e-05	5.4234934890960665e-06	0.0	0.0	0.0	0.0	0.0	0.0	0.0	0.0	0.0	0.0	0.0	1.807831163032022e-06	0.0	0.0	0.0	0.0
M(899)	5.061927256489662e-05	L:3.615662326064044e-06 , I:2.530963628244831e-05 , V:2.1693973956384266e-05	3.615662326064044e-06	2.530963628244831e-05	2.1693973956384266e-05	0.0	0.0	0.0	0.0	0.0	0.0	0.0	0.0	0.0	0.0	0.0	0.0	0.0	0.0	0.0	0.0	0.0
G(597)	5.061927256489662e-05	V:3.615662326064044e-06 , S:4.338794791276853e-05 , C:1.807831163032022e-06 , D:1.807831163032022e-06	0.0	0.0	3.615662326064044e-06	4.338794791276853e-05	0.0	1.807831163032022e-06	0.0	0.0	0.0	0.0	0.0	0.0	1.807831163032022e-06	0.0	0.0	0.0	0.0	0.0	0.0	0.0
N(300)	4.8811441401864594e-05	S:1.0846986978192133e-05 , T:1.807831163032022e-06 , D:3.434879209760842e-05 , K:1.807831163032022e-06	0.0	0.0	0.0	1.0846986978192133e-05	0.0	0.0	0.0	0.0	0.0	1.807831163032022e-06	0.0	0.0	3.434879209760842e-05	0.0	0.0	0.0	1.807831163032022e-06	0.0	0.0	0.0
Q(5)	4.8811441401864594e-05	L:9.03915581516011e-06 , H:2.1693973956384266e-05 , R:1.807831163032022e-05	9.03915581516011e-06	0.0	0.0	0.0	0.0	0.0	0.0	0.0	2.1693973956384266e-05	0.0	0.0	0.0	0.0	1.807831163032022e-05	0.0	0.0	0.0	0.0	0.0	0.0
V(827)	4.8811441401864594e-05	L:3.25409609345764e-05 , I:3.615662326064044e-06 , A:7.231324652128088e-06 , M:5.4234934890960665e-06	3.25409609345764e-05	3.615662326064044e-06	0.0	0.0	0.0	0.0	0.0	0.0	0.0	0.0	7.231324652128088e-06	0.0	0.0	0.0	5.4234934890960665e-06	0.0	0.0	0.0	0.0	0.0
T(926)	4.8811441401864594e-05	I:3.073312977154437e-05 , A:1.807831163032022e-05	0.0	3.073312977154437e-05	0.0	0.0	0.0	0.0	0.0	0.0	0.0	0.0	1.807831163032022e-05	0.0	0.0	0.0	0.0	0.0	0.0	0.0	0.0	0.0
I(856)	4.8811441401864594e-05	V:4.338794791276853e-05 , M:5.4234934890960665e-06	0.0	0.0	4.338794791276853e-05	0.0	0.0	0.0	0.0	0.0	0.0	0.0	0.0	0.0	0.0	0.0	5.4234934890960665e-06	0.0	0.0	0.0	0.0	0.0
I(715)	4.700361023883257e-05	L:1.807831163032022e-05 , V:1.807831163032022e-05 , S:7.231324652128088e-06 , T:3.615662326064044e-06	1.807831163032022e-05	0.0	1.807831163032022e-05	7.231324652128088e-06	0.0	0.0	0.0	0.0	0.0	3.615662326064044e-06	0.0	0.0	0.0	0.0	0.0	0.0	0.0	0.0	0.0	0.0
V(792)	4.700361023883257e-05	L:5.4234934890960665e-06 , I:3.434879209760842e-05 , F:1.807831163032022e-06 , A:3.615662326064044e-06 , G:1.807831163032022e-06	5.4234934890960665e-06	3.434879209760842e-05	0.0	0.0	1.807831163032022e-06	0.0	0.0	0.0	0.0	0.0	3.615662326064044e-06	1.807831163032022e-06	0.0	0.0	0.0	0.0	0.0	0.0	0.0	0.0
S(255)	4.700361023883257e-05	L:3.615662326064044e-05 , T:1.807831163032022e-06 , A:9.03915581516011e-06	3.615662326064044e-05	0.0	0.0	0.0	0.0	0.0	0.0	0.0	0.0	1.807831163032022e-06	9.03915581516011e-06	0.0	0.0	0.0	0.0	0.0	0.0	0.0	0.0	0.0
S(363)	4.700361023883257e-05	I:7.231324652128088e-06 , N:2.1693973956384266e-05 , G:5.4234934890960665e-06 , R:1.2654818141224155e-05	0.0	7.231324652128088e-06	0.0	0.0	0.0	0.0	0.0	2.1693973956384266e-05	0.0	0.0	0.0	5.4234934890960665e-06	0.0	1.2654818141224155e-05	0.0	0.0	0.0	0.0	0.0	0.0
L(401)	4.519577907580055e-05	F:4.519577907580055e-05	0.0	0.0	0.0	0.0	4.519577907580055e-05	0.0	0.0	0.0	0.0	0.0	0.0	0.0	0.0	0.0	0.0	0.0	0.0	0.0	0.0	0.0
K(417)	4.519577907580055e-05	I:1.807831163032022e-06 , N:1.807831163032022e-06 , R:1.807831163032022e-06 , E:3.615662326064044e-06 , Q:3.615662326064044e-05	0.0	1.807831163032022e-06	0.0	0.0	0.0	0.0	0.0	1.807831163032022e-06	0.0	0.0	0.0	0.0	0.0	1.807831163032022e-06	0.0	3.615662326064044e-06	0.0	3.615662326064044e-05	0.0	0.0
N(909)	4.519577907580055e-05	I:1.807831163032022e-06 , S:3.615662326064044e-05 , T:3.615662326064044e-06 , D:1.807831163032022e-06 , K:1.807831163032022e-06	0.0	1.807831163032022e-06	0.0	3.615662326064044e-05	0.0	0.0	0.0	0.0	0.0	3.615662326064044e-06	0.0	0.0	1.807831163032022e-06	0.0	0.0	0.0	1.807831163032022e-06	0.0	0.0	0.0
H(810)	4.519577907580055e-05	L:1.62704804672882e-05 , Y:1.9886142793352242e-05 , D:1.807831163032022e-06 , R:3.615662326064044e-06 , Q:3.615662326064044e-06	1.62704804672882e-05	0.0	0.0	0.0	0.0	0.0	1.9886142793352242e-05	0.0	0.0	0.0	0.0	0.0	1.807831163032022e-06	3.615662326064044e-06	0.0	0.0	0.0	3.615662326064044e-06	0.0	0.0
V(42)	4.519577907580055e-05	L:3.615662326064044e-05 , I:9.03915581516011e-06	3.615662326064044e-05	9.03915581516011e-06	0.0	0.0	0.0	0.0	0.0	0.0	0.0	0.0	0.0	0.0	0.0	0.0	0.0	0.0	0.0	0.0	0.0	0.0
F(222)	4.338794791276853e-05	L:3.9772285586704484e-05 , C:3.615662326064044e-06	3.9772285586704484e-05	0.0	0.0	0.0	0.0	3.615662326064044e-06	0.0	0.0	0.0	0.0	0.0	0.0	0.0	0.0	0.0	0.0	0.0	0.0	0.0	0.0
Y(122)	4.338794791276853e-05	C:1.807831163032022e-06 , N:1.807831163032022e-06 , H:3.9772285586704484e-05	0.0	0.0	0.0	0.0	0.0	1.807831163032022e-06	0.0	1.807831163032022e-06	3.9772285586704484e-05	0.0	0.0	0.0	0.0	0.0	0.0	0.0	0.0	0.0	0.0	0.0
M(519)	4.338794791276853e-05	L:2.1693973956384266e-05 , I:1.62704804672882e-05 , V:1.807831163032022e-06 , T:3.615662326064044e-06	2.1693973956384266e-05	1.62704804672882e-05	1.807831163032022e-06	0.0	0.0	0.0	0.0	0.0	0.0	3.615662326064044e-06	0.0	0.0	0.0	0.0	0.0	0.0	0.0	0.0	0.0	0.0
E(254)	4.338794791276853e-05	D:4.338794791276853e-05	0.0	0.0	0.0	0.0	0.0	0.0	0.0	0.0	0.0	0.0	0.0	0.0	4.338794791276853e-05	0.0	0.0	0.0	0.0	0.0	0.0	0.0
E(277)	4.338794791276853e-05	A:1.807831163032022e-06 , G:2.530963628244831e-05 , D:1.62704804672882e-05	0.0	0.0	0.0	0.0	0.0	0.0	0.0	0.0	0.0	0.0	1.807831163032022e-06	2.530963628244831e-05	1.62704804672882e-05	0.0	0.0	0.0	0.0	0.0	0.0	0.0
S(364)	4.338794791276853e-05	F:3.9772285586704484e-05 , A:3.615662326064044e-06	0.0	0.0	0.0	0.0	3.9772285586704484e-05	0.0	0.0	0.0	0.0	0.0	3.615662326064044e-06	0.0	0.0	0.0	0.0	0.0	0.0	0.0	0.0	0.0
C(730)	4.158011674973651e-05	F:3.434879209760842e-05 , Y:1.807831163032022e-06 , R:5.4234934890960665e-06	0.0	0.0	0.0	0.0	3.434879209760842e-05	0.0	1.807831163032022e-06	0.0	0.0	0.0	0.0	0.0	0.0	5.4234934890960665e-06	0.0	0.0	0.0	0.0	0.0	0.0
D(517)	4.158011674973651e-05	Y:1.807831163032022e-06 , G:3.434879209760842e-05 , E:5.4234934890960665e-06	0.0	0.0	0.0	0.0	0.0	0.0	1.807831163032022e-06	0.0	0.0	0.0	0.0	3.434879209760842e-05	0.0	0.0	0.0	5.4234934890960665e-06	0.0	0.0	0.0	0.0
V(476)	4.158011674973651e-05	I:5.4234934890960665e-06 , F:3.615662326064044e-06 , A:3.25409609345764e-05	0.0	5.4234934890960665e-06	0.0	0.0	3.615662326064044e-06	0.0	0.0	0.0	0.0	0.0	3.25409609345764e-05	0.0	0.0	0.0	0.0	0.0	0.0	0.0	0.0	0.0
N(88)	4.158011674973651e-05	S:2.530963628244831e-05 , T:1.807831163032022e-06 , D:1.0846986978192133e-05 , K:3.615662326064044e-06	0.0	0.0	0.0	2.530963628244831e-05	0.0	0.0	0.0	0.0	0.0	1.807831163032022e-06	0.0	0.0	1.0846986978192133e-05	0.0	0.0	0.0	3.615662326064044e-06	0.0	0.0	0.0
A(706)	4.158011674973651e-05	V:2.1693973956384266e-05 , S:1.807831163032022e-06 , T:1.807831163032022e-05	0.0	0.0	2.1693973956384266e-05	1.807831163032022e-06	0.0	0.0	0.0	0.0	0.0	1.807831163032022e-05	0.0	0.0	0.0	0.0	0.0	0.0	0.0	0.0	0.0	0.0
D(164)	4.158011674973651e-05	V:1.807831163032022e-06 , Y:3.615662326064044e-06 , N:1.807831163032022e-05 , G:1.0846986978192133e-05 , E:7.231324652128088e-06	0.0	0.0	1.807831163032022e-06	0.0	0.0	0.0	3.615662326064044e-06	1.807831163032022e-05	0.0	0.0	0.0	1.0846986978192133e-05	0.0	0.0	0.0	7.231324652128088e-06	0.0	0.0	0.0	0.0
S(709)	4.158011674973651e-05	F:3.615662326064044e-06 , A:3.796445442367246e-05	0.0	0.0	0.0	0.0	3.615662326064044e-06	0.0	0.0	0.0	0.0	0.0	3.796445442367246e-05	0.0	0.0	0.0	0.0	0.0	0.0	0.0	0.0	0.0
N(705)	4.158011674973651e-05	S:3.615662326064044e-06 , T:1.807831163032022e-06 , D:3.434879209760842e-05 , K:1.807831163032022e-06	0.0	0.0	0.0	3.615662326064044e-06	0.0	0.0	0.0	0.0	0.0	1.807831163032022e-06	0.0	0.0	3.434879209760842e-05	0.0	0.0	0.0	1.807831163032022e-06	0.0	0.0	0.0
D(481)	3.9772285586704484e-05	Y:7.231324652128088e-06 , N:1.807831163032022e-06 , A:5.4234934890960665e-06 , G:2.530963628244831e-05	0.0	0.0	0.0	0.0	0.0	0.0	7.231324652128088e-06	1.807831163032022e-06	0.0	0.0	5.4234934890960665e-06	2.530963628244831e-05	0.0	0.0	0.0	0.0	0.0	0.0	0.0	0.0
D(135)	3.9772285586704484e-05	Y:1.807831163032022e-05 , N:1.4462649304256176e-05 , G:1.807831163032022e-06 , E:5.4234934890960665e-06	0.0	0.0	0.0	0.0	0.0	0.0	1.807831163032022e-05	1.4462649304256176e-05	0.0	0.0	0.0	1.807831163032022e-06	0.0	0.0	0.0	5.4234934890960665e-06	0.0	0.0	0.0	0.0
A(660)	3.9772285586704484e-05	V:1.2654818141224155e-05 , S:2.711746744548033e-05	0.0	0.0	1.2654818141224155e-05	2.711746744548033e-05	0.0	0.0	0.0	0.0	0.0	0.0	0.0	0.0	0.0	0.0	0.0	0.0	0.0	0.0	0.0	0.0
S(433)	3.9772285586704484e-05	C:7.231324652128088e-06 , N:1.62704804672882e-05 , G:1.4462649304256176e-05 , R:1.807831163032022e-06	0.0	0.0	0.0	0.0	0.0	7.231324652128088e-06	0.0	1.62704804672882e-05	0.0	0.0	0.0	1.4462649304256176e-05	0.0	1.807831163032022e-06	0.0	0.0	0.0	0.0	0.0	0.0
V(905)	3.9772285586704484e-05	L:1.807831163032022e-06 , I:3.434879209760842e-05 , A:3.615662326064044e-06	1.807831163032022e-06	3.434879209760842e-05	0.0	0.0	0.0	0.0	0.0	0.0	0.0	0.0	3.615662326064044e-06	0.0	0.0	0.0	0.0	0.0	0.0	0.0	0.0	0.0
D(235)	3.9772285586704484e-05	V:3.615662326064044e-06 , N:1.0846986978192133e-05 , E:2.530963628244831e-05	0.0	0.0	3.615662326064044e-06	0.0	0.0	0.0	0.0	1.0846986978192133e-05	0.0	0.0	0.0	0.0	0.0	0.0	0.0	2.530963628244831e-05	0.0	0.0	0.0	0.0
N(497)	3.9772285586704484e-05	S:3.073312977154437e-05 , K:9.03915581516011e-06	0.0	0.0	0.0	3.073312977154437e-05	0.0	0.0	0.0	0.0	0.0	0.0	0.0	0.0	0.0	0.0	0.0	0.0	9.03915581516011e-06	0.0	0.0	0.0
G(670)	3.9772285586704484e-05	V:1.0846986978192133e-05 , S:1.2654818141224155e-05 , C:1.4462649304256176e-05 , D:1.807831163032022e-06	0.0	0.0	1.0846986978192133e-05	1.2654818141224155e-05	0.0	1.4462649304256176e-05	0.0	0.0	0.0	0.0	0.0	0.0	1.807831163032022e-06	0.0	0.0	0.0	0.0	0.0	0.0	0.0
R(105)	3.9772285586704484e-05	I:5.4234934890960665e-06 , S:1.807831163032022e-06 , G:1.9886142793352242e-05 , K:1.2654818141224155e-05	0.0	5.4234934890960665e-06	0.0	1.807831163032022e-06	0.0	0.0	0.0	0.0	0.0	0.0	0.0	1.9886142793352242e-05	0.0	0.0	0.0	0.0	1.2654818141224155e-05	0.0	0.0	0.0
V(335)	3.9772285586704484e-05	I:3.615662326064044e-06 , F:3.615662326064044e-05	0.0	3.615662326064044e-06	0.0	0.0	3.615662326064044e-05	0.0	0.0	0.0	0.0	0.0	0.0	0.0	0.0	0.0	0.0	0.0	0.0	0.0	0.0	0.0
D(804)	3.9772285586704484e-05	Y:1.62704804672882e-05 , N:1.807831163032022e-05 , H:3.615662326064044e-06 , E:1.807831163032022e-06	0.0	0.0	0.0	0.0	0.0	0.0	1.62704804672882e-05	1.807831163032022e-05	3.615662326064044e-06	0.0	0.0	0.0	0.0	0.0	0.0	1.807831163032022e-06	0.0	0.0	0.0	0.0
V(820)	3.9772285586704484e-05	L:1.807831163032022e-06 , I:9.03915581516011e-06 , F:2.530963628244831e-05 , A:3.615662326064044e-06	1.807831163032022e-06	9.03915581516011e-06	0.0	0.0	2.530963628244831e-05	0.0	0.0	0.0	0.0	0.0	3.615662326064044e-06	0.0	0.0	0.0	0.0	0.0	0.0	0.0	0.0	0.0
F(745)	3.796445442367246e-05	L:1.4462649304256176e-05 , V:2.3501805119416287e-05	1.4462649304256176e-05	0.0	2.3501805119416287e-05	0.0	0.0	0.0	0.0	0.0	0.0	0.0	0.0	0.0	0.0	0.0	0.0	0.0	0.0	0.0	0.0	0.0
S(384)	3.796445442367246e-05	F:5.4234934890960665e-06 , Y:1.0846986978192133e-05 , A:5.4234934890960665e-06 , P:1.62704804672882e-05	0.0	0.0	0.0	0.0	5.4234934890960665e-06	0.0	1.0846986978192133e-05	0.0	0.0	0.0	5.4234934890960665e-06	0.0	0.0	0.0	0.0	0.0	0.0	0.0	1.62704804672882e-05	0.0
W(509)	3.796445442367246e-05	L:7.231324652128088e-06 , C:2.530963628244831e-05 , R:3.615662326064044e-06 , M:1.807831163032022e-06	7.231324652128088e-06	0.0	0.0	0.0	0.0	2.530963628244831e-05	0.0	0.0	0.0	0.0	0.0	0.0	0.0	3.615662326064044e-06	1.807831163032022e-06	0.0	0.0	0.0	0.0	0.0
A(199)	3.796445442367246e-05	V:2.530963628244831e-05 , S:3.615662326064044e-06 , T:9.03915581516011e-06	0.0	0.0	2.530963628244831e-05	3.615662326064044e-06	0.0	0.0	0.0	0.0	0.0	9.03915581516011e-06	0.0	0.0	0.0	0.0	0.0	0.0	0.0	0.0	0.0	0.0
C(12)	3.796445442367246e-05	L:1.807831163032022e-06 , S:7.231324652128088e-06 , F:1.807831163032022e-06 , R:2.711746744548033e-05	1.807831163032022e-06	0.0	0.0	7.231324652128088e-06	1.807831163032022e-06	0.0	0.0	0.0	0.0	0.0	0.0	0.0	0.0	2.711746744548033e-05	0.0	0.0	0.0	0.0	0.0	0.0
R(132)	3.615662326064044e-05	M:2.3501805119416287e-05 , K:1.0846986978192133e-05 , W:1.807831163032022e-06	0.0	0.0	0.0	0.0	0.0	0.0	0.0	0.0	0.0	0.0	0.0	0.0	0.0	0.0	2.3501805119416287e-05	0.0	1.0846986978192133e-05	0.0	0.0	1.807831163032022e-06
L(282)	3.615662326064044e-05	I:2.711746744548033e-05 , F:7.231324652128088e-06 , P:1.807831163032022e-06	0.0	2.711746744548033e-05	0.0	0.0	7.231324652128088e-06	0.0	0.0	0.0	0.0	0.0	0.0	0.0	0.0	0.0	0.0	0.0	0.0	0.0	1.807831163032022e-06	0.0
D(67)	3.615662326064044e-05	Y:3.615662326064044e-06 , N:9.03915581516011e-06 , G:1.9886142793352242e-05 , E:3.615662326064044e-06	0.0	0.0	0.0	0.0	0.0	0.0	3.615662326064044e-06	9.03915581516011e-06	0.0	0.0	0.0	1.9886142793352242e-05	0.0	0.0	0.0	3.615662326064044e-06	0.0	0.0	0.0	0.0
N(781)	3.615662326064044e-05	S:3.25409609345764e-05 , D:3.615662326064044e-06	0.0	0.0	0.0	3.25409609345764e-05	0.0	0.0	0.0	0.0	0.0	0.0	0.0	0.0	3.615662326064044e-06	0.0	0.0	0.0	0.0	0.0	0.0	0.0
V(233)	3.615662326064044e-05	I:3.434879209760842e-05 , A:1.807831163032022e-06	0.0	3.434879209760842e-05	0.0	0.0	0.0	0.0	0.0	0.0	0.0	0.0	1.807831163032022e-06	0.0	0.0	0.0	0.0	0.0	0.0	0.0	0.0	0.0
Y(32)	3.615662326064044e-05	C:1.807831163032022e-05 , N:1.807831163032022e-06 , H:1.62704804672882e-05	0.0	0.0	0.0	0.0	0.0	1.807831163032022e-05	0.0	1.807831163032022e-06	1.62704804672882e-05	0.0	0.0	0.0	0.0	0.0	0.0	0.0	0.0	0.0	0.0	0.0
K(391)	3.615662326064044e-05	R:3.615662326064044e-05	0.0	0.0	0.0	0.0	0.0	0.0	0.0	0.0	0.0	0.0	0.0	0.0	0.0	3.615662326064044e-05	0.0	0.0	0.0	0.0	0.0	0.0
G(584)	3.615662326064044e-05	V:5.4234934890960665e-06 , R:1.807831163032022e-05 , E:1.2654818141224155e-05	0.0	0.0	5.4234934890960665e-06	0.0	0.0	0.0	0.0	0.0	0.0	0.0	0.0	0.0	0.0	1.807831163032022e-05	0.0	1.2654818141224155e-05	0.0	0.0	0.0	0.0
D(477)	3.615662326064044e-05	Y:1.807831163032022e-06 , N:1.807831163032022e-06 , G:3.25409609345764e-05	0.0	0.0	0.0	0.0	0.0	0.0	1.807831163032022e-06	1.807831163032022e-06	0.0	0.0	0.0	3.25409609345764e-05	0.0	0.0	0.0	0.0	0.0	0.0	0.0	0.0
N(404)	3.615662326064044e-05	I:1.807831163032022e-06 , S:1.807831163032022e-06 , Y:1.807831163032022e-06 , D:1.807831163032022e-06 , K:2.8925298608512352e-05	0.0	1.807831163032022e-06	0.0	1.807831163032022e-06	0.0	0.0	1.807831163032022e-06	0.0	0.0	0.0	0.0	0.0	1.807831163032022e-06	0.0	0.0	0.0	2.8925298608512352e-05	0.0	0.0	0.0
I(494)	3.615662326064044e-05	V:1.4462649304256176e-05 , T:2.1693973956384266e-05	0.0	0.0	1.4462649304256176e-05	0.0	0.0	0.0	0.0	0.0	0.0	2.1693973956384266e-05	0.0	0.0	0.0	0.0	0.0	0.0	0.0	0.0	0.0	0.0
D(260)	3.615662326064044e-05	Y:5.4234934890960665e-06 , N:1.62704804672882e-05 , H:1.807831163032022e-06 , A:5.4234934890960665e-06 , G:3.615662326064044e-06 , E:3.615662326064044e-06	0.0	0.0	0.0	0.0	0.0	0.0	5.4234934890960665e-06	1.62704804672882e-05	1.807831163032022e-06	0.0	5.4234934890960665e-06	3.615662326064044e-06	0.0	0.0	0.0	3.615662326064044e-06	0.0	0.0	0.0	0.0
E(370)	3.434879209760842e-05	G:3.615662326064044e-06 , D:2.8925298608512352e-05 , K:1.807831163032022e-06	0.0	0.0	0.0	0.0	0.0	0.0	0.0	0.0	0.0	0.0	0.0	3.615662326064044e-06	2.8925298608512352e-05	0.0	0.0	0.0	1.807831163032022e-06	0.0	0.0	0.0
I(66)	3.434879209760842e-05	V:9.03915581516011e-06 , S:1.0846986978192133e-05 , F:7.231324652128088e-06 , T:5.4234934890960665e-06 , M:1.807831163032022e-06	0.0	0.0	9.03915581516011e-06	1.0846986978192133e-05	7.231324652128088e-06	0.0	0.0	0.0	0.0	5.4234934890960665e-06	0.0	0.0	0.0	0.0	1.807831163032022e-06	0.0	0.0	0.0	0.0	0.0
I(86)	3.434879209760842e-05	L:3.615662326064044e-06 , V:5.4234934890960665e-06 , T:2.3501805119416287e-05 , M:1.807831163032022e-06	3.615662326064044e-06	0.0	5.4234934890960665e-06	0.0	0.0	0.0	0.0	0.0	0.0	2.3501805119416287e-05	0.0	0.0	0.0	0.0	1.807831163032022e-06	0.0	0.0	0.0	0.0	0.0
S(754)	3.434879209760842e-05	L:2.8925298608512352e-05 , T:3.615662326064044e-06 , P:1.807831163032022e-06	2.8925298608512352e-05	0.0	0.0	0.0	0.0	0.0	0.0	0.0	0.0	3.615662326064044e-06	0.0	0.0	0.0	0.0	0.0	0.0	0.0	0.0	1.807831163032022e-06	0.0
F(348)	3.434879209760842e-05	L:7.231324652128088e-06 , Y:2.711746744548033e-05	7.231324652128088e-06	0.0	0.0	0.0	0.0	0.0	2.711746744548033e-05	0.0	0.0	0.0	0.0	0.0	0.0	0.0	0.0	0.0	0.0	0.0	0.0	0.0
H(650)	3.25409609345764e-05	Y:1.4462649304256176e-05 , N:7.231324652128088e-06 , R:1.807831163032022e-06 , Q:9.03915581516011e-06	0.0	0.0	0.0	0.0	0.0	0.0	1.4462649304256176e-05	7.231324652128088e-06	0.0	0.0	0.0	0.0	0.0	1.807831163032022e-06	0.0	0.0	0.0	9.03915581516011e-06	0.0	0.0
E(802)	3.25409609345764e-05	G:3.615662326064044e-06 , D:2.711746744548033e-05 , K:1.807831163032022e-06	0.0	0.0	0.0	0.0	0.0	0.0	0.0	0.0	0.0	0.0	0.0	3.615662326064044e-06	2.711746744548033e-05	0.0	0.0	0.0	1.807831163032022e-06	0.0	0.0	0.0
N(874)	3.25409609345764e-05	S:5.4234934890960665e-06 , T:3.615662326064044e-06 , D:3.615662326064044e-06 , K:1.9886142793352242e-05	0.0	0.0	0.0	5.4234934890960665e-06	0.0	0.0	0.0	0.0	0.0	3.615662326064044e-06	0.0	0.0	3.615662326064044e-06	0.0	0.0	0.0	1.9886142793352242e-05	0.0	0.0	0.0
D(194)	3.25409609345764e-05	N:1.807831163032022e-06 , G:1.2654818141224155e-05 , E:1.807831163032022e-05	0.0	0.0	0.0	0.0	0.0	0.0	0.0	1.807831163032022e-06	0.0	0.0	0.0	1.2654818141224155e-05	0.0	0.0	0.0	1.807831163032022e-05	0.0	0.0	0.0	0.0
D(454)	3.25409609345764e-05	H:1.807831163032022e-06 , A:1.62704804672882e-05 , E:1.4462649304256176e-05	0.0	0.0	0.0	0.0	0.0	0.0	0.0	0.0	1.807831163032022e-06	0.0	1.62704804672882e-05	0.0	0.0	0.0	0.0	1.4462649304256176e-05	0.0	0.0	0.0	0.0
P(809)	3.25409609345764e-05	L:1.807831163032022e-06 , S:3.073312977154437e-05	1.807831163032022e-06	0.0	0.0	3.073312977154437e-05	0.0	0.0	0.0	0.0	0.0	0.0	0.0	0.0	0.0	0.0	0.0	0.0	0.0	0.0	0.0	0.0
N(386)	3.25409609345764e-05	S:2.711746744548033e-05 , T:1.807831163032022e-06 , D:1.807831163032022e-06 , K:1.807831163032022e-06	0.0	0.0	0.0	2.711746744548033e-05	0.0	0.0	0.0	0.0	0.0	1.807831163032022e-06	0.0	0.0	1.807831163032022e-06	0.0	0.0	0.0	1.807831163032022e-06	0.0	0.0	0.0
S(578)	3.25409609345764e-05	L:3.615662326064044e-06 , A:2.711746744548033e-05 , P:1.807831163032022e-06	3.615662326064044e-06	0.0	0.0	0.0	0.0	0.0	0.0	0.0	0.0	0.0	2.711746744548033e-05	0.0	0.0	0.0	0.0	0.0	0.0	0.0	1.807831163032022e-06	0.0
V(435)	3.073312977154437e-05	I:1.9886142793352242e-05 , F:1.0846986978192133e-05	0.0	1.9886142793352242e-05	0.0	0.0	1.0846986978192133e-05	0.0	0.0	0.0	0.0	0.0	0.0	0.0	0.0	0.0	0.0	0.0	0.0	0.0	0.0	0.0
Y(479)	3.073312977154437e-05	H:3.073312977154437e-05	0.0	0.0	0.0	0.0	0.0	0.0	0.0	0.0	3.073312977154437e-05	0.0	0.0	0.0	0.0	0.0	0.0	0.0	0.0	0.0	0.0	0.0
H(872)	3.073312977154437e-05	Y:2.8925298608512352e-05 , N:1.807831163032022e-06	0.0	0.0	0.0	0.0	0.0	0.0	2.8925298608512352e-05	1.807831163032022e-06	0.0	0.0	0.0	0.0	0.0	0.0	0.0	0.0	0.0	0.0	0.0	0.0
Y(828)	3.073312977154437e-05	C:9.03915581516011e-06 , N:3.615662326064044e-06 , H:1.807831163032022e-05	0.0	0.0	0.0	0.0	0.0	9.03915581516011e-06	0.0	3.615662326064044e-06	1.807831163032022e-05	0.0	0.0	0.0	0.0	0.0	0.0	0.0	0.0	0.0	0.0	0.0
K(103)	3.073312977154437e-05	N:1.2654818141224155e-05 , R:1.807831163032022e-05	0.0	0.0	0.0	0.0	0.0	0.0	0.0	1.2654818141224155e-05	0.0	0.0	0.0	0.0	0.0	1.807831163032022e-05	0.0	0.0	0.0	0.0	0.0	0.0
D(29)	3.073312977154437e-05	Y:3.615662326064044e-06 , A:3.615662326064044e-06 , G:1.4462649304256176e-05 , E:9.03915581516011e-06	0.0	0.0	0.0	0.0	0.0	0.0	3.615662326064044e-06	0.0	0.0	0.0	3.615662326064044e-06	1.4462649304256176e-05	0.0	0.0	0.0	9.03915581516011e-06	0.0	0.0	0.0	0.0
Q(57)	3.073312977154437e-05	L:5.4234934890960665e-06 , H:1.0846986978192133e-05 , R:1.4462649304256176e-05	5.4234934890960665e-06	0.0	0.0	0.0	0.0	0.0	0.0	0.0	1.0846986978192133e-05	0.0	0.0	0.0	0.0	1.4462649304256176e-05	0.0	0.0	0.0	0.0	0.0	0.0
V(693)	2.8925298608512352e-05	I:2.8925298608512352e-05	0.0	2.8925298608512352e-05	0.0	0.0	0.0	0.0	0.0	0.0	0.0	0.0	0.0	0.0	0.0	0.0	0.0	0.0	0.0	0.0	0.0	0.0
K(871)	2.8925298608512352e-05	R:2.8925298608512352e-05	0.0	0.0	0.0	0.0	0.0	0.0	0.0	0.0	0.0	0.0	0.0	0.0	0.0	2.8925298608512352e-05	0.0	0.0	0.0	0.0	0.0	0.0
D(484)	2.8925298608512352e-05	Y:7.231324652128088e-06 , N:1.0846986978192133e-05 , A:5.4234934890960665e-06 , G:1.807831163032022e-06 , E:3.615662326064044e-06	0.0	0.0	0.0	0.0	0.0	0.0	7.231324652128088e-06	1.0846986978192133e-05	0.0	0.0	5.4234934890960665e-06	1.807831163032022e-06	0.0	0.0	0.0	3.615662326064044e-06	0.0	0.0	0.0	0.0
V(234)	2.8925298608512352e-05	L:1.0846986978192133e-05 , I:3.615662326064044e-06 , A:1.2654818141224155e-05 , E:1.807831163032022e-06	1.0846986978192133e-05	3.615662326064044e-06	0.0	0.0	0.0	0.0	0.0	0.0	0.0	0.0	1.2654818141224155e-05	0.0	0.0	0.0	0.0	1.807831163032022e-06	0.0	0.0	0.0	0.0
L(212)	2.8925298608512352e-05	I:1.0846986978192133e-05 , F:1.807831163032022e-05	0.0	1.0846986978192133e-05	0.0	0.0	1.807831163032022e-05	0.0	0.0	0.0	0.0	0.0	0.0	0.0	0.0	0.0	0.0	0.0	0.0	0.0	0.0	0.0
R(726)	2.8925298608512352e-05	I:1.807831163032022e-06 , S:3.615662326064044e-06 , G:1.0846986978192133e-05 , K:1.2654818141224155e-05	0.0	1.807831163032022e-06	0.0	3.615662326064044e-06	0.0	0.0	0.0	0.0	0.0	0.0	0.0	1.0846986978192133e-05	0.0	0.0	0.0	0.0	1.2654818141224155e-05	0.0	0.0	0.0
F(157)	2.8925298608512352e-05	L:3.615662326064044e-06 , V:2.3501805119416287e-05 , C:1.807831163032022e-06	3.615662326064044e-06	0.0	2.3501805119416287e-05	0.0	0.0	1.807831163032022e-06	0.0	0.0	0.0	0.0	0.0	0.0	0.0	0.0	0.0	0.0	0.0	0.0	0.0	0.0
Y(746)	2.711746744548033e-05	C:2.530963628244831e-05 , H:1.807831163032022e-06	0.0	0.0	0.0	0.0	0.0	2.530963628244831e-05	0.0	0.0	1.807831163032022e-06	0.0	0.0	0.0	0.0	0.0	0.0	0.0	0.0	0.0	0.0	0.0
E(610)	2.711746744548033e-05	A:1.2654818141224155e-05 , G:1.0846986978192133e-05 , K:3.615662326064044e-06	0.0	0.0	0.0	0.0	0.0	0.0	0.0	0.0	0.0	0.0	1.2654818141224155e-05	1.0846986978192133e-05	0.0	0.0	0.0	0.0	3.615662326064044e-06	0.0	0.0	0.0
P(677)	2.711746744548033e-05	L:1.2654818141224155e-05 , S:1.0846986978192133e-05 , A:1.807831163032022e-06 , Q:1.807831163032022e-06	1.2654818141224155e-05	0.0	0.0	1.0846986978192133e-05	0.0	0.0	0.0	0.0	0.0	0.0	1.807831163032022e-06	0.0	0.0	0.0	0.0	0.0	0.0	1.807831163032022e-06	0.0	0.0
T(710)	2.711746744548033e-05	I:2.3501805119416287e-05 , N:3.615662326064044e-06	0.0	2.3501805119416287e-05	0.0	0.0	0.0	0.0	0.0	3.615662326064044e-06	0.0	0.0	0.0	0.0	0.0	0.0	0.0	0.0	0.0	0.0	0.0	0.0
A(253)	2.711746744548033e-05	V:1.4462649304256176e-05 , S:5.4234934890960665e-06 , T:5.4234934890960665e-06 , P:1.807831163032022e-06	0.0	0.0	1.4462649304256176e-05	5.4234934890960665e-06	0.0	0.0	0.0	0.0	0.0	5.4234934890960665e-06	0.0	0.0	0.0	0.0	0.0	0.0	0.0	0.0	1.807831163032022e-06	0.0
E(431)	2.711746744548033e-05	V:1.807831163032022e-06 , G:1.807831163032022e-05 , D:7.231324652128088e-06	0.0	0.0	1.807831163032022e-06	0.0	0.0	0.0	0.0	0.0	0.0	0.0	0.0	1.807831163032022e-05	7.231324652128088e-06	0.0	0.0	0.0	0.0	0.0	0.0	0.0
H(133)	2.711746744548033e-05	L:9.03915581516011e-06 , Y:5.4234934890960665e-06 , N:1.807831163032022e-06 , Q:1.0846986978192133e-05	9.03915581516011e-06	0.0	0.0	0.0	0.0	0.0	5.4234934890960665e-06	1.807831163032022e-06	0.0	0.0	0.0	0.0	0.0	0.0	0.0	0.0	0.0	1.0846986978192133e-05	0.0	0.0
I(333)	2.711746744548033e-05	V:9.03915581516011e-06 , T:1.807831163032022e-06 , M:1.62704804672882e-05	0.0	0.0	9.03915581516011e-06	0.0	0.0	0.0	0.0	0.0	0.0	1.807831163032022e-06	0.0	0.0	0.0	0.0	1.62704804672882e-05	0.0	0.0	0.0	0.0	0.0
E(278)	2.711746744548033e-05	V:1.807831163032022e-06 , D:2.530963628244831e-05	0.0	0.0	1.807831163032022e-06	0.0	0.0	0.0	0.0	0.0	0.0	0.0	0.0	0.0	2.530963628244831e-05	0.0	0.0	0.0	0.0	0.0	0.0	0.0
N(713)	2.530963628244831e-05	I:1.807831163032022e-05 , S:3.615662326064044e-06 , D:1.807831163032022e-06 , K:1.807831163032022e-06	0.0	1.807831163032022e-05	0.0	3.615662326064044e-06	0.0	0.0	0.0	0.0	0.0	0.0	0.0	0.0	1.807831163032022e-06	0.0	0.0	0.0	1.807831163032022e-06	0.0	0.0	0.0
F(56)	2.530963628244831e-05	L:1.62704804672882e-05 , C:5.4234934890960665e-06 , Y:3.615662326064044e-06	1.62704804672882e-05	0.0	0.0	0.0	0.0	5.4234934890960665e-06	3.615662326064044e-06	0.0	0.0	0.0	0.0	0.0	0.0	0.0	0.0	0.0	0.0	0.0	0.0	0.0
W(916)	2.530963628244831e-05	L:1.2654818141224155e-05 , F:3.615662326064044e-06 , C:9.03915581516011e-06	1.2654818141224155e-05	0.0	0.0	0.0	3.615662326064044e-06	9.03915581516011e-06	0.0	0.0	0.0	0.0	0.0	0.0	0.0	0.0	0.0	0.0	0.0	0.0	0.0	0.0
G(413)	2.530963628244831e-05	V:1.807831163032022e-06 , S:1.807831163032022e-05 , C:3.615662326064044e-06 , A:1.807831163032022e-06	0.0	0.0	1.807831163032022e-06	1.807831163032022e-05	0.0	3.615662326064044e-06	0.0	0.0	0.0	0.0	1.807831163032022e-06	0.0	0.0	0.0	0.0	0.0	0.0	0.0	0.0	0.0
P(834)	2.530963628244831e-05	L:5.4234934890960665e-06 , S:1.62704804672882e-05 , T:1.807831163032022e-06 , Q:1.807831163032022e-06	5.4234934890960665e-06	0.0	0.0	1.62704804672882e-05	0.0	0.0	0.0	0.0	0.0	1.807831163032022e-06	0.0	0.0	0.0	0.0	0.0	0.0	0.0	1.807831163032022e-06	0.0	0.0
P(537)	2.530963628244831e-05	S:2.530963628244831e-05	0.0	0.0	0.0	2.530963628244831e-05	0.0	0.0	0.0	0.0	0.0	0.0	0.0	0.0	0.0	0.0	0.0	0.0	0.0	0.0	0.0	0.0
R(305)	2.3501805119416287e-05	G:1.2654818141224155e-05 , K:1.0846986978192133e-05	0.0	0.0	0.0	0.0	0.0	0.0	0.0	0.0	0.0	0.0	0.0	1.2654818141224155e-05	0.0	0.0	0.0	0.0	1.0846986978192133e-05	0.0	0.0	0.0
V(557)	2.3501805119416287e-05	L:5.4234934890960665e-06 , I:1.807831163032022e-05	5.4234934890960665e-06	1.807831163032022e-05	0.0	0.0	0.0	0.0	0.0	0.0	0.0	0.0	0.0	0.0	0.0	0.0	0.0	0.0	0.0	0.0	0.0	0.0
L(885)	2.3501805119416287e-05	I:2.1693973956384266e-05 , V:1.807831163032022e-06	0.0	2.1693973956384266e-05	1.807831163032022e-06	0.0	0.0	0.0	0.0	0.0	0.0	0.0	0.0	0.0	0.0	0.0	0.0	0.0	0.0	0.0	0.0	0.0
N(360)	2.3501805119416287e-05	S:1.807831163032022e-06 , D:1.62704804672882e-05 , K:5.4234934890960665e-06	0.0	0.0	0.0	1.807831163032022e-06	0.0	0.0	0.0	0.0	0.0	0.0	0.0	0.0	1.62704804672882e-05	0.0	0.0	0.0	5.4234934890960665e-06	0.0	0.0	0.0
A(762)	2.3501805119416287e-05	S:1.807831163032022e-06 , T:2.1693973956384266e-05	0.0	0.0	0.0	1.807831163032022e-06	0.0	0.0	0.0	0.0	0.0	2.1693973956384266e-05	0.0	0.0	0.0	0.0	0.0	0.0	0.0	0.0	0.0	0.0
E(84)	2.3501805119416287e-05	V:1.807831163032022e-06 , G:7.231324652128088e-06 , K:1.4462649304256176e-05	0.0	0.0	1.807831163032022e-06	0.0	0.0	0.0	0.0	0.0	0.0	0.0	0.0	7.231324652128088e-06	0.0	0.0	0.0	0.0	1.4462649304256176e-05	0.0	0.0	0.0
F(471)	2.3501805119416287e-05	L:1.807831163032022e-05 , I:3.615662326064044e-06 , V:1.807831163032022e-06	1.807831163032022e-05	3.615662326064044e-06	1.807831163032022e-06	0.0	0.0	0.0	0.0	0.0	0.0	0.0	0.0	0.0	0.0	0.0	0.0	0.0	0.0	0.0	0.0	0.0
D(3)	2.3501805119416287e-05	N:3.615662326064044e-06 , G:7.231324652128088e-06 , E:1.2654818141224155e-05	0.0	0.0	0.0	0.0	0.0	0.0	0.0	3.615662326064044e-06	0.0	0.0	0.0	7.231324652128088e-06	0.0	0.0	0.0	1.2654818141224155e-05	0.0	0.0	0.0	0.0
T(896)	2.3501805119416287e-05	I:1.4462649304256176e-05 , A:7.231324652128088e-06 , K:1.807831163032022e-06	0.0	1.4462649304256176e-05	0.0	0.0	0.0	0.0	0.0	0.0	0.0	0.0	7.231324652128088e-06	0.0	0.0	0.0	0.0	0.0	1.807831163032022e-06	0.0	0.0	0.0
R(74)	2.3501805119416287e-05	I:3.615662326064044e-06 , K:1.9886142793352242e-05	0.0	3.615662326064044e-06	0.0	0.0	0.0	0.0	0.0	0.0	0.0	0.0	0.0	0.0	0.0	0.0	0.0	0.0	1.9886142793352242e-05	0.0	0.0	0.0
M(542)	2.3501805119416287e-05	L:1.807831163032022e-05 , I:5.4234934890960665e-06	1.807831163032022e-05	5.4234934890960665e-06	0.0	0.0	0.0	0.0	0.0	0.0	0.0	0.0	0.0	0.0	0.0	0.0	0.0	0.0	0.0	0.0	0.0	0.0
H(381)	2.3501805119416287e-05	Y:2.1693973956384266e-05 , R:1.807831163032022e-06	0.0	0.0	0.0	0.0	0.0	0.0	2.1693973956384266e-05	0.0	0.0	0.0	0.0	0.0	0.0	1.807831163032022e-06	0.0	0.0	0.0	0.0	0.0	0.0
V(410)	2.1693973956384266e-05	I:1.807831163032022e-05 , F:3.615662326064044e-06	0.0	1.807831163032022e-05	0.0	0.0	3.615662326064044e-06	0.0	0.0	0.0	0.0	0.0	0.0	0.0	0.0	0.0	0.0	0.0	0.0	0.0	0.0	0.0
L(245)	2.1693973956384266e-05	V:3.615662326064044e-06 , S:1.807831163032022e-06 , F:1.62704804672882e-05	0.0	0.0	3.615662326064044e-06	1.807831163032022e-06	1.62704804672882e-05	0.0	0.0	0.0	0.0	0.0	0.0	0.0	0.0	0.0	0.0	0.0	0.0	0.0	0.0	0.0
I(450)	2.1693973956384266e-05	V:7.231324652128088e-06 , T:1.4462649304256176e-05	0.0	0.0	7.231324652128088e-06	0.0	0.0	0.0	0.0	0.0	0.0	1.4462649304256176e-05	0.0	0.0	0.0	0.0	0.0	0.0	0.0	0.0	0.0	0.0
I(37)	2.1693973956384266e-05	V:2.1693973956384266e-05	0.0	0.0	2.1693973956384266e-05	0.0	0.0	0.0	0.0	0.0	0.0	0.0	0.0	0.0	0.0	0.0	0.0	0.0	0.0	0.0	0.0	0.0
W(290)	2.1693973956384266e-05	C:1.9886142793352242e-05 , R:1.807831163032022e-06	0.0	0.0	0.0	0.0	0.0	1.9886142793352242e-05	0.0	0.0	0.0	0.0	0.0	0.0	0.0	1.807831163032022e-06	0.0	0.0	0.0	0.0	0.0	0.0
I(837)	2.1693973956384266e-05	L:1.62704804672882e-05 , V:5.4234934890960665e-06	1.62704804672882e-05	0.0	5.4234934890960665e-06	0.0	0.0	0.0	0.0	0.0	0.0	0.0	0.0	0.0	0.0	0.0	0.0	0.0	0.0	0.0	0.0	0.0
V(31)	2.1693973956384266e-05	I:1.2654818141224155e-05 , A:9.03915581516011e-06	0.0	1.2654818141224155e-05	0.0	0.0	0.0	0.0	0.0	0.0	0.0	0.0	9.03915581516011e-06	0.0	0.0	0.0	0.0	0.0	0.0	0.0	0.0	0.0
C(151)	2.1693973956384266e-05	F:1.807831163032022e-06 , Y:1.4462649304256176e-05 , R:5.4234934890960665e-06	0.0	0.0	0.0	0.0	1.807831163032022e-06	0.0	1.4462649304256176e-05	0.0	0.0	0.0	0.0	0.0	0.0	5.4234934890960665e-06	0.0	0.0	0.0	0.0	0.0	0.0
A(777)	2.1693973956384266e-05	V:3.615662326064044e-06 , S:1.62704804672882e-05 , T:1.807831163032022e-06	0.0	0.0	3.615662326064044e-06	1.62704804672882e-05	0.0	0.0	0.0	0.0	0.0	1.807831163032022e-06	0.0	0.0	0.0	0.0	0.0	0.0	0.0	0.0	0.0	0.0
I(757)	2.1693973956384266e-05	V:1.807831163032022e-05 , T:3.615662326064044e-06	0.0	0.0	1.807831163032022e-05	0.0	0.0	0.0	0.0	0.0	0.0	3.615662326064044e-06	0.0	0.0	0.0	0.0	0.0	0.0	0.0	0.0	0.0	0.0
V(704)	2.1693973956384266e-05	L:1.807831163032022e-06 , I:7.231324652128088e-06 , F:1.807831163032022e-06 , A:1.0846986978192133e-05	1.807831163032022e-06	7.231324652128088e-06	0.0	0.0	1.807831163032022e-06	0.0	0.0	0.0	0.0	0.0	1.0846986978192133e-05	0.0	0.0	0.0	0.0	0.0	0.0	0.0	0.0	0.0
C(139)	2.1693973956384266e-05	S:1.9886142793352242e-05 , Y:1.807831163032022e-06	0.0	0.0	0.0	1.9886142793352242e-05	0.0	0.0	1.807831163032022e-06	0.0	0.0	0.0	0.0	0.0	0.0	0.0	0.0	0.0	0.0	0.0	0.0	0.0
K(714)	2.1693973956384266e-05	N:7.231324652128088e-06 , R:1.2654818141224155e-05 , Q:1.807831163032022e-06	0.0	0.0	0.0	0.0	0.0	0.0	0.0	7.231324652128088e-06	0.0	0.0	0.0	0.0	0.0	1.2654818141224155e-05	0.0	0.0	0.0	1.807831163032022e-06	0.0	0.0
V(342)	2.1693973956384266e-05	L:5.4234934890960665e-06 , I:1.0846986978192133e-05 , F:5.4234934890960665e-06	5.4234934890960665e-06	1.0846986978192133e-05	0.0	0.0	5.4234934890960665e-06	0.0	0.0	0.0	0.0	0.0	0.0	0.0	0.0	0.0	0.0	0.0	0.0	0.0	0.0	0.0
N(600)	2.1693973956384266e-05	S:1.2654818141224155e-05 , Y:3.615662326064044e-06 , H:1.807831163032022e-06 , D:3.615662326064044e-06	0.0	0.0	0.0	1.2654818141224155e-05	0.0	0.0	3.615662326064044e-06	0.0	1.807831163032022e-06	0.0	0.0	0.0	3.615662326064044e-06	0.0	0.0	0.0	0.0	0.0	0.0	0.0
F(506)	2.1693973956384266e-05	L:2.1693973956384266e-05	2.1693973956384266e-05	0.0	0.0	0.0	0.0	0.0	0.0	0.0	0.0	0.0	0.0	0.0	0.0	0.0	0.0	0.0	0.0	0.0	0.0	0.0
L(187)	2.1693973956384266e-05	S:1.9886142793352242e-05 , F:1.807831163032022e-06	0.0	0.0	0.0	1.9886142793352242e-05	1.807831163032022e-06	0.0	0.0	0.0	0.0	0.0	0.0	0.0	0.0	0.0	0.0	0.0	0.0	0.0	0.0	0.0
L(366)	2.1693973956384266e-05	I:7.231324652128088e-06 , V:1.807831163032022e-06 , F:1.0846986978192133e-05 , H:1.807831163032022e-06	0.0	7.231324652128088e-06	1.807831163032022e-06	0.0	1.0846986978192133e-05	0.0	0.0	0.0	1.807831163032022e-06	0.0	0.0	0.0	0.0	0.0	0.0	0.0	0.0	0.0	0.0	0.0
F(321)	2.1693973956384266e-05	L:1.62704804672882e-05 , V:1.807831163032022e-06 , C:3.615662326064044e-06	1.62704804672882e-05	0.0	1.807831163032022e-06	0.0	0.0	3.615662326064044e-06	0.0	0.0	0.0	0.0	0.0	0.0	0.0	0.0	0.0	0.0	0.0	0.0	0.0	0.0
A(375)	1.9886142793352242e-05	V:1.807831163032022e-06 , T:1.807831163032022e-05	0.0	0.0	1.807831163032022e-06	0.0	0.0	0.0	0.0	0.0	0.0	1.807831163032022e-05	0.0	0.0	0.0	0.0	0.0	0.0	0.0	0.0	0.0	0.0
E(136)	1.9886142793352242e-05	V:1.807831163032022e-06 , A:1.807831163032022e-06 , G:3.615662326064044e-06 , D:1.0846986978192133e-05 , K:1.807831163032022e-06	0.0	0.0	1.807831163032022e-06	0.0	0.0	0.0	0.0	0.0	0.0	0.0	1.807831163032022e-06	3.615662326064044e-06	1.0846986978192133e-05	0.0	0.0	0.0	1.807831163032022e-06	0.0	0.0	0.0
L(329)	1.9886142793352242e-05	I:1.9886142793352242e-05	0.0	1.9886142793352242e-05	0.0	0.0	0.0	0.0	0.0	0.0	0.0	0.0	0.0	0.0	0.0	0.0	0.0	0.0	0.0	0.0	0.0	0.0
K(281)	1.9886142793352242e-05	N:3.615662326064044e-06 , R:1.807831163032022e-06 , E:1.0846986978192133e-05 , Q:3.615662326064044e-06	0.0	0.0	0.0	0.0	0.0	0.0	0.0	3.615662326064044e-06	0.0	0.0	0.0	0.0	0.0	1.807831163032022e-06	0.0	1.0846986978192133e-05	0.0	3.615662326064044e-06	0.0	0.0
V(353)	1.9886142793352242e-05	I:1.4462649304256176e-05 , F:1.807831163032022e-06 , A:3.615662326064044e-06	0.0	1.4462649304256176e-05	0.0	0.0	1.807831163032022e-06	0.0	0.0	0.0	0.0	0.0	3.615662326064044e-06	0.0	0.0	0.0	0.0	0.0	0.0	0.0	0.0	0.0
D(608)	1.9886142793352242e-05	V:1.807831163032022e-06 , Y:1.2654818141224155e-05 , G:5.4234934890960665e-06	0.0	0.0	1.807831163032022e-06	0.0	0.0	0.0	1.2654818141224155e-05	0.0	0.0	0.0	0.0	5.4234934890960665e-06	0.0	0.0	0.0	0.0	0.0	0.0	0.0	0.0
N(496)	1.807831163032022e-05	S:1.4462649304256176e-05 , T:1.807831163032022e-06 , K:1.807831163032022e-06	0.0	0.0	0.0	1.4462649304256176e-05	0.0	0.0	0.0	0.0	0.0	1.807831163032022e-06	0.0	0.0	0.0	0.0	0.0	0.0	1.807831163032022e-06	0.0	0.0	0.0
Y(546)	1.807831163032022e-05	F:1.4462649304256176e-05 , C:1.807831163032022e-06 , H:1.807831163032022e-06	0.0	0.0	0.0	0.0	1.4462649304256176e-05	1.807831163032022e-06	0.0	0.0	1.807831163032022e-06	0.0	0.0	0.0	0.0	0.0	0.0	0.0	0.0	0.0	0.0	0.0
I(696)	1.807831163032022e-05	F:3.615662326064044e-06 , T:1.4462649304256176e-05	0.0	0.0	0.0	0.0	3.615662326064044e-06	0.0	0.0	0.0	0.0	1.4462649304256176e-05	0.0	0.0	0.0	0.0	0.0	0.0	0.0	0.0	0.0	0.0
N(215)	1.807831163032022e-05	S:1.807831163032022e-06 , D:1.0846986978192133e-05 , K:5.4234934890960665e-06	0.0	0.0	0.0	1.807831163032022e-06	0.0	0.0	0.0	0.0	0.0	0.0	0.0	0.0	1.0846986978192133e-05	0.0	0.0	0.0	5.4234934890960665e-06	0.0	0.0	0.0
F(275)	1.807831163032022e-05	L:1.807831163032022e-06 , S:1.807831163032022e-06 , Y:1.4462649304256176e-05	1.807831163032022e-06	0.0	0.0	1.807831163032022e-06	0.0	0.0	1.4462649304256176e-05	0.0	0.0	0.0	0.0	0.0	0.0	0.0	0.0	0.0	0.0	0.0	0.0	0.0
I(114)	1.807831163032022e-05	T:3.615662326064044e-06 , M:1.4462649304256176e-05	0.0	0.0	0.0	0.0	0.0	0.0	0.0	0.0	0.0	3.615662326064044e-06	0.0	0.0	0.0	0.0	1.4462649304256176e-05	0.0	0.0	0.0	0.0	0.0
N(791)	1.807831163032022e-05	S:1.807831163032022e-05	0.0	0.0	0.0	1.807831163032022e-05	0.0	0.0	0.0	0.0	0.0	0.0	0.0	0.0	0.0	0.0	0.0	0.0	0.0	0.0	0.0	0.0
T(189)	1.807831163032022e-05	I:1.807831163032022e-06 , S:1.807831163032022e-06 , A:1.2654818141224155e-05 , K:1.807831163032022e-06	0.0	1.807831163032022e-06	0.0	1.807831163032022e-06	0.0	0.0	0.0	0.0	0.0	0.0	1.2654818141224155e-05	0.0	0.0	0.0	0.0	0.0	1.807831163032022e-06	0.0	0.0	0.0
L(142)	1.807831163032022e-05	V:9.03915581516011e-06 , F:9.03915581516011e-06	0.0	0.0	9.03915581516011e-06	0.0	9.03915581516011e-06	0.0	0.0	0.0	0.0	0.0	0.0	0.0	0.0	0.0	0.0	0.0	0.0	0.0	0.0	0.0
C(799)	1.807831163032022e-05	F:1.0846986978192133e-05 , Y:7.231324652128088e-06	0.0	0.0	0.0	0.0	1.0846986978192133e-05	0.0	7.231324652128088e-06	0.0	0.0	0.0	0.0	0.0	0.0	0.0	0.0	0.0	0.0	0.0	0.0	0.0
T(929)	1.807831163032022e-05	I:1.0846986978192133e-05 , A:7.231324652128088e-06	0.0	1.0846986978192133e-05	0.0	0.0	0.0	0.0	0.0	0.0	0.0	0.0	7.231324652128088e-06	0.0	0.0	0.0	0.0	0.0	0.0	0.0	0.0	0.0
L(89)	1.807831163032022e-05	V:1.807831163032022e-06 , S:1.62704804672882e-05	0.0	0.0	1.807831163032022e-06	1.62704804672882e-05	0.0	0.0	0.0	0.0	0.0	0.0	0.0	0.0	0.0	0.0	0.0	0.0	0.0	0.0	0.0	0.0
W(162)	1.807831163032022e-05	L:1.807831163032022e-06 , C:1.4462649304256176e-05 , R:1.807831163032022e-06	1.807831163032022e-06	0.0	0.0	0.0	0.0	1.4462649304256176e-05	0.0	0.0	0.0	0.0	0.0	0.0	0.0	1.807831163032022e-06	0.0	0.0	0.0	0.0	0.0	0.0
R(651)	1.807831163032022e-05	C:1.807831163032022e-05	0.0	0.0	0.0	0.0	0.0	1.807831163032022e-05	0.0	0.0	0.0	0.0	0.0	0.0	0.0	0.0	0.0	0.0	0.0	0.0	0.0	0.0
M(902)	1.807831163032022e-05	L:1.807831163032022e-06 , I:1.0846986978192133e-05 , V:3.615662326064044e-06 , T:1.807831163032022e-06	1.807831163032022e-06	1.0846986978192133e-05	3.615662326064044e-06	0.0	0.0	0.0	0.0	0.0	0.0	1.807831163032022e-06	0.0	0.0	0.0	0.0	0.0	0.0	0.0	0.0	0.0	0.0
D(825)	1.807831163032022e-05	Y:1.807831163032022e-06 , N:5.4234934890960665e-06 , G:3.615662326064044e-06 , E:7.231324652128088e-06	0.0	0.0	0.0	0.0	0.0	0.0	1.807831163032022e-06	5.4234934890960665e-06	0.0	0.0	0.0	3.615662326064044e-06	0.0	0.0	0.0	7.231324652128088e-06	0.0	0.0	0.0	0.0
F(429)	1.62704804672882e-05	L:1.4462649304256176e-05 , S:1.807831163032022e-06	1.4462649304256176e-05	0.0	0.0	1.807831163032022e-06	0.0	0.0	0.0	0.0	0.0	0.0	0.0	0.0	0.0	0.0	0.0	0.0	0.0	0.0	0.0	0.0
D(901)	1.62704804672882e-05	Y:1.0846986978192133e-05 , N:3.615662326064044e-06 , G:1.807831163032022e-06	0.0	0.0	0.0	0.0	0.0	0.0	1.0846986978192133e-05	3.615662326064044e-06	0.0	0.0	0.0	1.807831163032022e-06	0.0	0.0	0.0	0.0	0.0	0.0	0.0	0.0
K(47)	1.62704804672882e-05	R:3.615662326064044e-06 , Q:1.2654818141224155e-05	0.0	0.0	0.0	0.0	0.0	0.0	0.0	0.0	0.0	0.0	0.0	0.0	0.0	3.615662326064044e-06	0.0	0.0	0.0	1.2654818141224155e-05	0.0	0.0
T(206)	1.62704804672882e-05	S:1.807831163032022e-06 , A:1.4462649304256176e-05	0.0	0.0	0.0	1.807831163032022e-06	0.0	0.0	0.0	0.0	0.0	0.0	1.4462649304256176e-05	0.0	0.0	0.0	0.0	0.0	0.0	0.0	0.0	0.0
L(707)	1.62704804672882e-05	I:1.2654818141224155e-05 , F:3.615662326064044e-06	0.0	1.2654818141224155e-05	0.0	0.0	3.615662326064044e-06	0.0	0.0	0.0	0.0	0.0	0.0	0.0	0.0	0.0	0.0	0.0	0.0	0.0	0.0	0.0
V(204)	1.62704804672882e-05	I:1.62704804672882e-05	0.0	1.62704804672882e-05	0.0	0.0	0.0	0.0	0.0	0.0	0.0	0.0	0.0	0.0	0.0	0.0	0.0	0.0	0.0	0.0	0.0	0.0
R(392)	1.62704804672882e-05	C:1.62704804672882e-05	0.0	0.0	0.0	0.0	0.0	1.62704804672882e-05	0.0	0.0	0.0	0.0	0.0	0.0	0.0	0.0	0.0	0.0	0.0	0.0	0.0	0.0
L(775)	1.62704804672882e-05	I:7.231324652128088e-06 , V:1.807831163032022e-06 , R:1.807831163032022e-06 , Q:5.4234934890960665e-06	0.0	7.231324652128088e-06	1.807831163032022e-06	0.0	0.0	0.0	0.0	0.0	0.0	0.0	0.0	0.0	0.0	1.807831163032022e-06	0.0	0.0	0.0	5.4234934890960665e-06	0.0	0.0
F(793)	1.62704804672882e-05	L:5.4234934890960665e-06 , S:3.615662326064044e-06 , C:5.4234934890960665e-06 , Y:1.807831163032022e-06	5.4234934890960665e-06	0.0	0.0	3.615662326064044e-06	0.0	5.4234934890960665e-06	1.807831163032022e-06	0.0	0.0	0.0	0.0	0.0	0.0	0.0	0.0	0.0	0.0	0.0	0.0	0.0
V(844)	1.62704804672882e-05	L:1.62704804672882e-05	1.62704804672882e-05	0.0	0.0	0.0	0.0	0.0	0.0	0.0	0.0	0.0	0.0	0.0	0.0	0.0	0.0	0.0	0.0	0.0	0.0	0.0
L(544)	1.62704804672882e-05	I:1.807831163032022e-06 , H:1.0846986978192133e-05 , P:3.615662326064044e-06	0.0	1.807831163032022e-06	0.0	0.0	0.0	0.0	0.0	0.0	1.0846986978192133e-05	0.0	0.0	0.0	0.0	0.0	0.0	0.0	0.0	0.0	3.615662326064044e-06	0.0
L(758)	1.62704804672882e-05	I:3.615662326064044e-06 , V:1.0846986978192133e-05 , F:1.807831163032022e-06	0.0	3.615662326064044e-06	1.0846986978192133e-05	0.0	1.807831163032022e-06	0.0	0.0	0.0	0.0	0.0	0.0	0.0	0.0	0.0	0.0	0.0	0.0	0.0	0.0	0.0
Y(831)	1.62704804672882e-05	C:1.807831163032022e-06 , H:1.4462649304256176e-05	0.0	0.0	0.0	0.0	0.0	1.807831163032022e-06	0.0	0.0	1.4462649304256176e-05	0.0	0.0	0.0	0.0	0.0	0.0	0.0	0.0	0.0	0.0	0.0
L(49)	1.62704804672882e-05	I:7.231324652128088e-06 , P:9.03915581516011e-06	0.0	7.231324652128088e-06	0.0	0.0	0.0	0.0	0.0	0.0	0.0	0.0	0.0	0.0	0.0	0.0	0.0	0.0	0.0	0.0	9.03915581516011e-06	0.0
W(268)	1.4462649304256176e-05	L:1.807831163032022e-06 , C:1.2654818141224155e-05	1.807831163032022e-06	0.0	0.0	0.0	0.0	1.2654818141224155e-05	0.0	0.0	0.0	0.0	0.0	0.0	0.0	0.0	0.0	0.0	0.0	0.0	0.0	0.0
S(549)	1.4462649304256176e-05	N:7.231324652128088e-06 , G:7.231324652128088e-06	0.0	0.0	0.0	0.0	0.0	0.0	0.0	7.231324652128088e-06	0.0	0.0	0.0	7.231324652128088e-06	0.0	0.0	0.0	0.0	0.0	0.0	0.0	0.0
K(159)	1.4462649304256176e-05	N:1.807831163032022e-06 , R:1.0846986978192133e-05 , E:1.807831163032022e-06	0.0	0.0	0.0	0.0	0.0	0.0	0.0	1.807831163032022e-06	0.0	0.0	0.0	0.0	0.0	1.0846986978192133e-05	0.0	1.807831163032022e-06	0.0	0.0	0.0	0.0
I(888)	1.4462649304256176e-05	V:1.4462649304256176e-05	0.0	0.0	1.4462649304256176e-05	0.0	0.0	0.0	0.0	0.0	0.0	0.0	0.0	0.0	0.0	0.0	0.0	0.0	0.0	0.0	0.0	0.0
K(41)	1.4462649304256176e-05	N:7.231324652128088e-06 , R:7.231324652128088e-06	0.0	0.0	0.0	0.0	0.0	0.0	0.0	7.231324652128088e-06	0.0	0.0	0.0	0.0	0.0	7.231324652128088e-06	0.0	0.0	0.0	0.0	0.0	0.0
L(372)	1.4462649304256176e-05	I:1.807831163032022e-06 , F:1.2654818141224155e-05	0.0	1.807831163032022e-06	0.0	0.0	1.2654818141224155e-05	0.0	0.0	0.0	0.0	0.0	0.0	0.0	0.0	0.0	0.0	0.0	0.0	0.0	0.0	0.0
F(368)	1.4462649304256176e-05	L:9.03915581516011e-06 , Y:3.615662326064044e-06 , H:1.807831163032022e-06	9.03915581516011e-06	0.0	0.0	0.0	0.0	0.0	3.615662326064044e-06	0.0	1.807831163032022e-06	0.0	0.0	0.0	0.0	0.0	0.0	0.0	0.0	0.0	0.0	0.0
S(115)	1.4462649304256176e-05	A:1.4462649304256176e-05	0.0	0.0	0.0	0.0	0.0	0.0	0.0	0.0	0.0	0.0	1.4462649304256176e-05	0.0	0.0	0.0	0.0	0.0	0.0	0.0	0.0	0.0
L(146)	1.4462649304256176e-05	I:9.03915581516011e-06 , F:3.615662326064044e-06 , P:1.807831163032022e-06	0.0	9.03915581516011e-06	0.0	0.0	3.615662326064044e-06	0.0	0.0	0.0	0.0	0.0	0.0	0.0	0.0	0.0	0.0	0.0	0.0	0.0	1.807831163032022e-06	0.0
F(283)	1.2654818141224155e-05	L:3.615662326064044e-06 , S:9.03915581516011e-06	3.615662326064044e-06	0.0	0.0	9.03915581516011e-06	0.0	0.0	0.0	0.0	0.0	0.0	0.0	0.0	0.0	0.0	0.0	0.0	0.0	0.0	0.0	0.0
G(841)	1.2654818141224155e-05	S:9.03915581516011e-06 , C:1.807831163032022e-06 , D:1.807831163032022e-06	0.0	0.0	0.0	9.03915581516011e-06	0.0	1.807831163032022e-06	0.0	0.0	0.0	0.0	0.0	0.0	1.807831163032022e-06	0.0	0.0	0.0	0.0	0.0	0.0	0.0
R(640)	1.2654818141224155e-05	L:1.807831163032022e-06 , S:1.807831163032022e-06 , C:3.615662326064044e-06 , H:5.4234934890960665e-06	1.807831163032022e-06	0.0	0.0	1.807831163032022e-06	0.0	3.615662326064044e-06	0.0	0.0	5.4234934890960665e-06	0.0	0.0	0.0	0.0	0.0	0.0	0.0	0.0	0.0	0.0	0.0
L(271)	1.2654818141224155e-05	S:1.2654818141224155e-05	0.0	0.0	0.0	1.2654818141224155e-05	0.0	0.0	0.0	0.0	0.0	0.0	0.0	0.0	0.0	0.0	0.0	0.0	0.0	0.0	0.0	0.0
P(378)	1.2654818141224155e-05	L:1.807831163032022e-06 , S:1.0846986978192133e-05	1.807831163032022e-06	0.0	0.0	1.0846986978192133e-05	0.0	0.0	0.0	0.0	0.0	0.0	0.0	0.0	0.0	0.0	0.0	0.0	0.0	0.0	0.0	0.0
Y(374)	1.2654818141224155e-05	F:7.231324652128088e-06 , H:5.4234934890960665e-06	0.0	0.0	0.0	0.0	7.231324652128088e-06	0.0	0.0	0.0	5.4234934890960665e-06	0.0	0.0	0.0	0.0	0.0	0.0	0.0	0.0	0.0	0.0	0.0
D(845)	1.2654818141224155e-05	Y:1.0846986978192133e-05 , N:1.807831163032022e-06	0.0	0.0	0.0	0.0	0.0	0.0	1.0846986978192133e-05	1.807831163032022e-06	0.0	0.0	0.0	0.0	0.0	0.0	0.0	0.0	0.0	0.0	0.0	0.0
D(846)	1.2654818141224155e-05	Y:3.615662326064044e-06 , N:3.615662326064044e-06 , A:1.807831163032022e-06 , E:3.615662326064044e-06	0.0	0.0	0.0	0.0	0.0	0.0	3.615662326064044e-06	3.615662326064044e-06	0.0	0.0	1.807831163032022e-06	0.0	0.0	0.0	0.0	3.615662326064044e-06	0.0	0.0	0.0	0.0
K(641)	1.2654818141224155e-05	T:1.807831163032022e-06 , R:1.0846986978192133e-05	0.0	0.0	0.0	0.0	0.0	0.0	0.0	0.0	0.0	1.807831163032022e-06	0.0	0.0	0.0	1.0846986978192133e-05	0.0	0.0	0.0	0.0	0.0	0.0
S(672)	1.2654818141224155e-05	L:5.4234934890960665e-06 , A:3.615662326064044e-06 , P:3.615662326064044e-06	5.4234934890960665e-06	0.0	0.0	0.0	0.0	0.0	0.0	0.0	0.0	0.0	3.615662326064044e-06	0.0	0.0	0.0	0.0	0.0	0.0	0.0	3.615662326064044e-06	0.0
N(297)	1.2654818141224155e-05	S:1.0846986978192133e-05 , D:1.807831163032022e-06	0.0	0.0	0.0	1.0846986978192133e-05	0.0	0.0	0.0	0.0	0.0	0.0	0.0	0.0	1.807831163032022e-06	0.0	0.0	0.0	0.0	0.0	0.0	0.0
N(489)	1.2654818141224155e-05	S:7.231324652128088e-06 , T:1.807831163032022e-06 , K:3.615662326064044e-06	0.0	0.0	0.0	7.231324652128088e-06	0.0	0.0	0.0	0.0	0.0	1.807831163032022e-06	0.0	0.0	0.0	0.0	0.0	0.0	3.615662326064044e-06	0.0	0.0	0.0
C(482)	1.2654818141224155e-05	S:3.615662326064044e-06 , Y:7.231324652128088e-06 , G:1.807831163032022e-06	0.0	0.0	0.0	3.615662326064044e-06	0.0	0.0	7.231324652128088e-06	0.0	0.0	0.0	0.0	1.807831163032022e-06	0.0	0.0	0.0	0.0	0.0	0.0	0.0	0.0
Q(117)	1.2654818141224155e-05	L:3.615662326064044e-06 , R:3.615662326064044e-06 , K:3.615662326064044e-06 , P:1.807831163032022e-06	3.615662326064044e-06	0.0	0.0	0.0	0.0	0.0	0.0	0.0	0.0	0.0	0.0	0.0	0.0	3.615662326064044e-06	0.0	0.0	3.615662326064044e-06	0.0	1.807831163032022e-06	0.0
R(733)	1.2654818141224155e-05	I:1.807831163032022e-06 , K:1.0846986978192133e-05	0.0	1.807831163032022e-06	0.0	0.0	0.0	0.0	0.0	0.0	0.0	0.0	0.0	0.0	0.0	0.0	0.0	0.0	1.0846986978192133e-05	0.0	0.0	0.0
I(548)	1.2654818141224155e-05	V:1.2654818141224155e-05	0.0	0.0	1.2654818141224155e-05	0.0	0.0	0.0	0.0	0.0	0.0	0.0	0.0	0.0	0.0	0.0	0.0	0.0	0.0	0.0	0.0	0.0
H(113)	1.2654818141224155e-05	Y:1.2654818141224155e-05	0.0	0.0	0.0	0.0	0.0	0.0	1.2654818141224155e-05	0.0	0.0	0.0	0.0	0.0	0.0	0.0	0.0	0.0	0.0	0.0	0.0	0.0
I(779)	1.2654818141224155e-05	L:1.807831163032022e-06 , V:3.615662326064044e-06 , M:7.231324652128088e-06	1.807831163032022e-06	0.0	3.615662326064044e-06	0.0	0.0	0.0	0.0	0.0	0.0	0.0	0.0	0.0	0.0	0.0	7.231324652128088e-06	0.0	0.0	0.0	0.0	0.0
L(460)	1.2654818141224155e-05	I:5.4234934890960665e-06 , K:1.807831163032022e-06 , Q:5.4234934890960665e-06	0.0	5.4234934890960665e-06	0.0	0.0	0.0	0.0	0.0	0.0	0.0	0.0	0.0	0.0	0.0	0.0	0.0	0.0	1.807831163032022e-06	5.4234934890960665e-06	0.0	0.0
P(627)	1.2654818141224155e-05	L:1.807831163032022e-06 , S:9.03915581516011e-06 , A:1.807831163032022e-06	1.807831163032022e-06	0.0	0.0	9.03915581516011e-06	0.0	0.0	0.0	0.0	0.0	0.0	1.807831163032022e-06	0.0	0.0	0.0	0.0	0.0	0.0	0.0	0.0	0.0
V(493)	1.2654818141224155e-05	I:1.2654818141224155e-05	0.0	1.2654818141224155e-05	0.0	0.0	0.0	0.0	0.0	0.0	0.0	0.0	0.0	0.0	0.0	0.0	0.0	0.0	0.0	0.0	0.0	0.0
C(93)	1.2654818141224155e-05	S:9.03915581516011e-06 , Y:1.807831163032022e-06 , R:1.807831163032022e-06	0.0	0.0	0.0	9.03915581516011e-06	0.0	0.0	1.807831163032022e-06	0.0	0.0	0.0	0.0	0.0	0.0	1.807831163032022e-06	0.0	0.0	0.0	0.0	0.0	0.0
N(414)	1.2654818141224155e-05	I:1.807831163032022e-06 , S:1.807831163032022e-06 , Y:1.807831163032022e-06 , T:3.615662326064044e-06 , D:1.807831163032022e-06 , K:1.807831163032022e-06	0.0	1.807831163032022e-06	0.0	1.807831163032022e-06	0.0	0.0	1.807831163032022e-06	0.0	0.0	3.615662326064044e-06	0.0	0.0	1.807831163032022e-06	0.0	0.0	0.0	1.807831163032022e-06	0.0	0.0	0.0
F(35)	1.2654818141224155e-05	L:5.4234934890960665e-06 , I:1.807831163032022e-06 , V:1.807831163032022e-06 , S:1.807831163032022e-06 , Y:1.807831163032022e-06	5.4234934890960665e-06	1.807831163032022e-06	1.807831163032022e-06	1.807831163032022e-06	0.0	0.0	1.807831163032022e-06	0.0	0.0	0.0	0.0	0.0	0.0	0.0	0.0	0.0	0.0	0.0	0.0	0.0
E(917)	1.2654818141224155e-05	I:1.807831163032022e-06 , K:1.0846986978192133e-05	0.0	1.807831163032022e-06	0.0	0.0	0.0	0.0	0.0	0.0	0.0	0.0	0.0	0.0	0.0	0.0	0.0	0.0	1.0846986978192133e-05	0.0	0.0	0.0
A(634)	1.2654818141224155e-05	V:5.4234934890960665e-06 , S:7.231324652128088e-06	0.0	0.0	5.4234934890960665e-06	7.231324652128088e-06	0.0	0.0	0.0	0.0	0.0	0.0	0.0	0.0	0.0	0.0	0.0	0.0	0.0	0.0	0.0	0.0
Q(886)	1.2654818141224155e-05	R:1.2654818141224155e-05	0.0	0.0	0.0	0.0	0.0	0.0	0.0	0.0	0.0	0.0	0.0	0.0	0.0	1.2654818141224155e-05	0.0	0.0	0.0	0.0	0.0	0.0
F(7)	1.0846986978192133e-05	L:5.4234934890960665e-06 , Y:5.4234934890960665e-06	5.4234934890960665e-06	0.0	0.0	0.0	0.0	0.0	5.4234934890960665e-06	0.0	0.0	0.0	0.0	0.0	0.0	0.0	0.0	0.0	0.0	0.0	0.0	0.0
H(347)	1.0846986978192133e-05	N:7.231324652128088e-06 , R:1.807831163032022e-06 , Q:1.807831163032022e-06	0.0	0.0	0.0	0.0	0.0	0.0	0.0	7.231324652128088e-06	0.0	0.0	0.0	0.0	0.0	1.807831163032022e-06	0.0	0.0	0.0	1.807831163032022e-06	0.0	0.0
E(474)	1.0846986978192133e-05	A:1.0846986978192133e-05	0.0	0.0	0.0	0.0	0.0	0.0	0.0	0.0	0.0	0.0	1.0846986978192133e-05	0.0	0.0	0.0	0.0	0.0	0.0	0.0	0.0	0.0
Q(524)	1.0846986978192133e-05	L:9.03915581516011e-06 , K:1.807831163032022e-06	9.03915581516011e-06	0.0	0.0	0.0	0.0	0.0	0.0	0.0	0.0	0.0	0.0	0.0	0.0	0.0	0.0	0.0	1.807831163032022e-06	0.0	0.0	0.0
K(288)	1.0846986978192133e-05	N:1.807831163032022e-06 , R:7.231324652128088e-06 , Q:1.807831163032022e-06	0.0	0.0	0.0	0.0	0.0	0.0	0.0	1.807831163032022e-06	0.0	0.0	0.0	0.0	0.0	7.231324652128088e-06	0.0	0.0	0.0	1.807831163032022e-06	0.0	0.0
S(239)	1.0846986978192133e-05	L:1.807831163032022e-06 , A:9.03915581516011e-06	1.807831163032022e-06	0.0	0.0	0.0	0.0	0.0	0.0	0.0	0.0	0.0	9.03915581516011e-06	0.0	0.0	0.0	0.0	0.0	0.0	0.0	0.0	0.0
K(890)	1.0846986978192133e-05	N:1.807831163032022e-06 , R:9.03915581516011e-06	0.0	0.0	0.0	0.0	0.0	0.0	0.0	1.807831163032022e-06	0.0	0.0	0.0	0.0	0.0	9.03915581516011e-06	0.0	0.0	0.0	0.0	0.0	0.0
T(28)	1.0846986978192133e-05	I:1.807831163032022e-06 , A:9.03915581516011e-06	0.0	1.807831163032022e-06	0.0	0.0	0.0	0.0	0.0	0.0	0.0	0.0	9.03915581516011e-06	0.0	0.0	0.0	0.0	0.0	0.0	0.0	0.0	0.0
I(864)	1.0846986978192133e-05	V:3.615662326064044e-06 , T:1.807831163032022e-06 , M:5.4234934890960665e-06	0.0	0.0	3.615662326064044e-06	0.0	0.0	0.0	0.0	0.0	0.0	1.807831163032022e-06	0.0	0.0	0.0	0.0	5.4234934890960665e-06	0.0	0.0	0.0	0.0	0.0
Y(129)	1.0846986978192133e-05	F:1.807831163032022e-06 , H:9.03915581516011e-06	0.0	0.0	0.0	0.0	1.807831163032022e-06	0.0	0.0	0.0	9.03915581516011e-06	0.0	0.0	0.0	0.0	0.0	0.0	0.0	0.0	0.0	0.0	0.0
T(409)	1.0846986978192133e-05	I:1.0846986978192133e-05	0.0	1.0846986978192133e-05	0.0	0.0	0.0	0.0	0.0	0.0	0.0	0.0	0.0	0.0	0.0	0.0	0.0	0.0	0.0	0.0	0.0	0.0
T(817)	1.0846986978192133e-05	I:9.03915581516011e-06 , K:1.807831163032022e-06	0.0	9.03915581516011e-06	0.0	0.0	0.0	0.0	0.0	0.0	0.0	0.0	0.0	0.0	0.0	0.0	0.0	0.0	1.807831163032022e-06	0.0	0.0	0.0
R(735)	1.0846986978192133e-05	I:3.615662326064044e-06 , S:1.807831163032022e-06 , G:5.4234934890960665e-06	0.0	3.615662326064044e-06	0.0	1.807831163032022e-06	0.0	0.0	0.0	0.0	0.0	0.0	0.0	5.4234934890960665e-06	0.0	0.0	0.0	0.0	0.0	0.0	0.0	0.0
Y(238)	1.0846986978192133e-05	F:1.807831163032022e-06 , C:5.4234934890960665e-06 , H:3.615662326064044e-06	0.0	0.0	0.0	0.0	1.807831163032022e-06	5.4234934890960665e-06	0.0	0.0	3.615662326064044e-06	0.0	0.0	0.0	0.0	0.0	0.0	0.0	0.0	0.0	0.0	0.0
R(889)	1.0846986978192133e-05	G:1.807831163032022e-06 , K:9.03915581516011e-06	0.0	0.0	0.0	0.0	0.0	0.0	0.0	0.0	0.0	0.0	0.0	1.807831163032022e-06	0.0	0.0	0.0	0.0	9.03915581516011e-06	0.0	0.0	0.0
Y(69)	1.0846986978192133e-05	C:3.615662326064044e-06 , H:7.231324652128088e-06	0.0	0.0	0.0	0.0	0.0	3.615662326064044e-06	0.0	0.0	7.231324652128088e-06	0.0	0.0	0.0	0.0	0.0	0.0	0.0	0.0	0.0	0.0	0.0
V(202)	1.0846986978192133e-05	I:3.615662326064044e-06 , F:3.615662326064044e-06 , A:3.615662326064044e-06	0.0	3.615662326064044e-06	0.0	0.0	3.615662326064044e-06	0.0	0.0	0.0	0.0	0.0	3.615662326064044e-06	0.0	0.0	0.0	0.0	0.0	0.0	0.0	0.0	0.0
E(167)	1.0846986978192133e-05	A:1.807831163032022e-06 , G:1.807831163032022e-06 , D:1.807831163032022e-06 , K:1.807831163032022e-06 , Q:3.615662326064044e-06	0.0	0.0	0.0	0.0	0.0	0.0	0.0	0.0	0.0	0.0	1.807831163032022e-06	1.807831163032022e-06	1.807831163032022e-06	0.0	0.0	0.0	1.807831163032022e-06	3.615662326064044e-06	0.0	0.0
L(308)	1.0846986978192133e-05	V:1.807831163032022e-06 , M:9.03915581516011e-06	0.0	0.0	1.807831163032022e-06	0.0	0.0	0.0	0.0	0.0	0.0	0.0	0.0	0.0	0.0	0.0	9.03915581516011e-06	0.0	0.0	0.0	0.0	0.0
P(832)	1.0846986978192133e-05	L:9.03915581516011e-06 , S:1.807831163032022e-06	9.03915581516011e-06	0.0	0.0	1.807831163032022e-06	0.0	0.0	0.0	0.0	0.0	0.0	0.0	0.0	0.0	0.0	0.0	0.0	0.0	0.0	0.0	0.0
M(924)	1.0846986978192133e-05	L:1.807831163032022e-06 , I:1.807831163032022e-06 , R:7.231324652128088e-06	1.807831163032022e-06	1.807831163032022e-06	0.0	0.0	0.0	0.0	0.0	0.0	0.0	0.0	0.0	0.0	0.0	7.231324652128088e-06	0.0	0.0	0.0	0.0	0.0	0.0
N(79)	9.03915581516011e-06	L:1.807831163032022e-06 , T:3.615662326064044e-06 , K:3.615662326064044e-06	1.807831163032022e-06	0.0	0.0	0.0	0.0	0.0	0.0	0.0	0.0	3.615662326064044e-06	0.0	0.0	0.0	0.0	0.0	0.0	3.615662326064044e-06	0.0	0.0	0.0
V(72)	9.03915581516011e-06	I:7.231324652128088e-06 , A:1.807831163032022e-06	0.0	7.231324652128088e-06	0.0	0.0	0.0	0.0	0.0	0.0	0.0	0.0	1.807831163032022e-06	0.0	0.0	0.0	0.0	0.0	0.0	0.0	0.0	0.0
L(723)	9.03915581516011e-06	S:7.231324652128088e-06 , F:1.807831163032022e-06	0.0	0.0	0.0	7.231324652128088e-06	1.807831163032022e-06	0.0	0.0	0.0	0.0	0.0	0.0	0.0	0.0	0.0	0.0	0.0	0.0	0.0	0.0	0.0
C(54)	9.03915581516011e-06	F:1.807831163032022e-06 , R:3.615662326064044e-06 , W:3.615662326064044e-06	0.0	0.0	0.0	0.0	1.807831163032022e-06	0.0	0.0	0.0	0.0	0.0	0.0	0.0	0.0	3.615662326064044e-06	0.0	0.0	0.0	0.0	0.0	3.615662326064044e-06
F(326)	9.03915581516011e-06	L:9.03915581516011e-06	9.03915581516011e-06	0.0	0.0	0.0	0.0	0.0	0.0	0.0	0.0	0.0	0.0	0.0	0.0	0.0	0.0	0.0	0.0	0.0	0.0	0.0
Y(87)	9.03915581516011e-06	F:3.615662326064044e-06 , C:5.4234934890960665e-06	0.0	0.0	0.0	0.0	3.615662326064044e-06	5.4234934890960665e-06	0.0	0.0	0.0	0.0	0.0	0.0	0.0	0.0	0.0	0.0	0.0	0.0	0.0	0.0
L(727)	9.03915581516011e-06	I:5.4234934890960665e-06 , F:1.807831163032022e-06 , P:1.807831163032022e-06	0.0	5.4234934890960665e-06	0.0	0.0	1.807831163032022e-06	0.0	0.0	0.0	0.0	0.0	0.0	0.0	0.0	0.0	0.0	0.0	0.0	0.0	1.807831163032022e-06	0.0
L(838)	9.03915581516011e-06	I:7.231324652128088e-06 , V:1.807831163032022e-06	0.0	7.231324652128088e-06	1.807831163032022e-06	0.0	0.0	0.0	0.0	0.0	0.0	0.0	0.0	0.0	0.0	0.0	0.0	0.0	0.0	0.0	0.0	0.0
L(207)	9.03915581516011e-06	V:1.807831163032022e-06 , S:7.231324652128088e-06	0.0	0.0	1.807831163032022e-06	7.231324652128088e-06	0.0	0.0	0.0	0.0	0.0	0.0	0.0	0.0	0.0	0.0	0.0	0.0	0.0	0.0	0.0	0.0
Y(595)	9.03915581516011e-06	C:5.4234934890960665e-06 , H:3.615662326064044e-06	0.0	0.0	0.0	0.0	0.0	5.4234934890960665e-06	0.0	0.0	3.615662326064044e-06	0.0	0.0	0.0	0.0	0.0	0.0	0.0	0.0	0.0	0.0	0.0
V(359)	9.03915581516011e-06	L:1.807831163032022e-06 , I:5.4234934890960665e-06 , A:1.807831163032022e-06	1.807831163032022e-06	5.4234934890960665e-06	0.0	0.0	0.0	0.0	0.0	0.0	0.0	0.0	1.807831163032022e-06	0.0	0.0	0.0	0.0	0.0	0.0	0.0	0.0	0.0
F(442)	9.03915581516011e-06	L:3.615662326064044e-06 , S:1.807831163032022e-06 , Y:3.615662326064044e-06	3.615662326064044e-06	0.0	0.0	1.807831163032022e-06	0.0	0.0	3.615662326064044e-06	0.0	0.0	0.0	0.0	0.0	0.0	0.0	0.0	0.0	0.0	0.0	0.0	0.0
T(123)	9.03915581516011e-06	A:9.03915581516011e-06	0.0	0.0	0.0	0.0	0.0	0.0	0.0	0.0	0.0	0.0	9.03915581516011e-06	0.0	0.0	0.0	0.0	0.0	0.0	0.0	0.0	0.0
Y(770)	9.03915581516011e-06	C:3.615662326064044e-06 , H:5.4234934890960665e-06	0.0	0.0	0.0	0.0	0.0	3.615662326064044e-06	0.0	0.0	5.4234934890960665e-06	0.0	0.0	0.0	0.0	0.0	0.0	0.0	0.0	0.0	0.0	0.0
K(121)	9.03915581516011e-06	R:5.4234934890960665e-06 , E:3.615662326064044e-06	0.0	0.0	0.0	0.0	0.0	0.0	0.0	0.0	0.0	0.0	0.0	0.0	0.0	5.4234934890960665e-06	0.0	3.615662326064044e-06	0.0	0.0	0.0	0.0
T(120)	9.03915581516011e-06	I:1.807831163032022e-06 , V:1.807831163032022e-06 , A:5.4234934890960665e-06	0.0	1.807831163032022e-06	1.807831163032022e-06	0.0	0.0	0.0	0.0	0.0	0.0	0.0	5.4234934890960665e-06	0.0	0.0	0.0	0.0	0.0	0.0	0.0	0.0	0.0
G(220)	9.03915581516011e-06	V:1.807831163032022e-06 , S:3.615662326064044e-06 , C:1.807831163032022e-06 , R:1.807831163032022e-06	0.0	0.0	1.807831163032022e-06	3.615662326064044e-06	0.0	1.807831163032022e-06	0.0	0.0	0.0	0.0	0.0	0.0	0.0	1.807831163032022e-06	0.0	0.0	0.0	0.0	0.0	0.0
D(274)	9.03915581516011e-06	N:1.807831163032022e-06 , E:7.231324652128088e-06	0.0	0.0	0.0	0.0	0.0	0.0	0.0	1.807831163032022e-06	0.0	0.0	0.0	0.0	0.0	0.0	0.0	7.231324652128088e-06	0.0	0.0	0.0	0.0
R(555)	9.03915581516011e-06	C:9.03915581516011e-06	0.0	0.0	0.0	0.0	0.0	9.03915581516011e-06	0.0	0.0	0.0	0.0	0.0	0.0	0.0	0.0	0.0	0.0	0.0	0.0	0.0	0.0
K(783)	9.03915581516011e-06	N:5.4234934890960665e-06 , R:3.615662326064044e-06	0.0	0.0	0.0	0.0	0.0	0.0	0.0	5.4234934890960665e-06	0.0	0.0	0.0	0.0	0.0	3.615662326064044e-06	0.0	0.0	0.0	0.0	0.0	0.0
I(539)	9.03915581516011e-06	V:1.807831163032022e-06 , T:7.231324652128088e-06	0.0	0.0	1.807831163032022e-06	0.0	0.0	0.0	0.0	0.0	0.0	7.231324652128088e-06	0.0	0.0	0.0	0.0	0.0	0.0	0.0	0.0	0.0	0.0
L(387)	9.03915581516011e-06	I:5.4234934890960665e-06 , V:3.615662326064044e-06	0.0	5.4234934890960665e-06	3.615662326064044e-06	0.0	0.0	0.0	0.0	0.0	0.0	0.0	0.0	0.0	0.0	0.0	0.0	0.0	0.0	0.0	0.0	0.0
M(855)	9.03915581516011e-06	L:1.807831163032022e-06 , I:7.231324652128088e-06	1.807831163032022e-06	7.231324652128088e-06	0.0	0.0	0.0	0.0	0.0	0.0	0.0	0.0	0.0	0.0	0.0	0.0	0.0	0.0	0.0	0.0	0.0	0.0
A(34)	9.03915581516011e-06	V:5.4234934890960665e-06 , S:3.615662326064044e-06	0.0	0.0	5.4234934890960665e-06	3.615662326064044e-06	0.0	0.0	0.0	0.0	0.0	0.0	0.0	0.0	0.0	0.0	0.0	0.0	0.0	0.0	0.0	0.0
G(352)	9.03915581516011e-06	D:9.03915581516011e-06	0.0	0.0	0.0	0.0	0.0	0.0	0.0	0.0	0.0	0.0	0.0	0.0	9.03915581516011e-06	0.0	0.0	0.0	0.0	0.0	0.0	0.0
R(467)	9.03915581516011e-06	G:1.807831163032022e-06 , K:7.231324652128088e-06	0.0	0.0	0.0	0.0	0.0	0.0	0.0	0.0	0.0	0.0	0.0	1.807831163032022e-06	0.0	0.0	0.0	0.0	7.231324652128088e-06	0.0	0.0	0.0
F(165)	9.03915581516011e-06	S:3.615662326064044e-06 , C:5.4234934890960665e-06	0.0	0.0	0.0	3.615662326064044e-06	0.0	5.4234934890960665e-06	0.0	0.0	0.0	0.0	0.0	0.0	0.0	0.0	0.0	0.0	0.0	0.0	0.0	0.0
L(469)	9.03915581516011e-06	I:7.231324652128088e-06 , Q:1.807831163032022e-06	0.0	7.231324652128088e-06	0.0	0.0	0.0	0.0	0.0	0.0	0.0	0.0	0.0	0.0	0.0	0.0	0.0	0.0	0.0	1.807831163032022e-06	0.0	0.0
P(296)	7.231324652128088e-06	S:3.615662326064044e-06 , Q:3.615662326064044e-06	0.0	0.0	0.0	3.615662326064044e-06	0.0	0.0	0.0	0.0	0.0	0.0	0.0	0.0	0.0	0.0	0.0	0.0	0.0	3.615662326064044e-06	0.0	0.0
V(30)	7.231324652128088e-06	L:1.807831163032022e-06 , I:1.807831163032022e-06 , A:1.807831163032022e-06 , G:1.807831163032022e-06	1.807831163032022e-06	1.807831163032022e-06	0.0	0.0	0.0	0.0	0.0	0.0	0.0	0.0	1.807831163032022e-06	1.807831163032022e-06	0.0	0.0	0.0	0.0	0.0	0.0	0.0	0.0
S(835)	7.231324652128088e-06	L:1.807831163032022e-06 , A:5.4234934890960665e-06	1.807831163032022e-06	0.0	0.0	0.0	0.0	0.0	0.0	0.0	0.0	0.0	5.4234934890960665e-06	0.0	0.0	0.0	0.0	0.0	0.0	0.0	0.0	0.0
F(70)	7.231324652128088e-06	L:1.807831163032022e-06 , S:3.615662326064044e-06 , Y:1.807831163032022e-06	1.807831163032022e-06	0.0	0.0	3.615662326064044e-06	0.0	0.0	1.807831163032022e-06	0.0	0.0	0.0	0.0	0.0	0.0	0.0	0.0	0.0	0.0	0.0	0.0	0.0
Y(515)	7.231324652128088e-06	C:7.231324652128088e-06	0.0	0.0	0.0	0.0	0.0	7.231324652128088e-06	0.0	0.0	0.0	0.0	0.0	0.0	0.0	0.0	0.0	0.0	0.0	0.0	0.0	0.0
W(216)	7.231324652128088e-06	C:5.4234934890960665e-06 , R:1.807831163032022e-06	0.0	0.0	0.0	0.0	0.0	5.4234934890960665e-06	0.0	0.0	0.0	0.0	0.0	0.0	0.0	1.807831163032022e-06	0.0	0.0	0.0	0.0	0.0	0.0
N(534)	7.231324652128088e-06	S:7.231324652128088e-06	0.0	0.0	0.0	7.231324652128088e-06	0.0	0.0	0.0	0.0	0.0	0.0	0.0	0.0	0.0	0.0	0.0	0.0	0.0	0.0	0.0	0.0
V(535)	7.231324652128088e-06	I:3.615662326064044e-06 , F:1.807831163032022e-06 , A:1.807831163032022e-06	0.0	3.615662326064044e-06	0.0	0.0	1.807831163032022e-06	0.0	0.0	0.0	0.0	0.0	1.807831163032022e-06	0.0	0.0	0.0	0.0	0.0	0.0	0.0	0.0	0.0
E(665)	7.231324652128088e-06	G:1.807831163032022e-06 , D:3.615662326064044e-06 , K:1.807831163032022e-06	0.0	0.0	0.0	0.0	0.0	0.0	0.0	0.0	0.0	0.0	0.0	1.807831163032022e-06	3.615662326064044e-06	0.0	0.0	0.0	1.807831163032022e-06	0.0	0.0	0.0
S(15)	7.231324652128088e-06	C:1.807831163032022e-06 , N:3.615662326064044e-06 , R:1.807831163032022e-06	0.0	0.0	0.0	0.0	0.0	1.807831163032022e-06	0.0	3.615662326064044e-06	0.0	0.0	0.0	0.0	0.0	1.807831163032022e-06	0.0	0.0	0.0	0.0	0.0	0.0
T(324)	7.231324652128088e-06	I:3.615662326064044e-06 , S:1.807831163032022e-06 , K:1.807831163032022e-06	0.0	3.615662326064044e-06	0.0	1.807831163032022e-06	0.0	0.0	0.0	0.0	0.0	0.0	0.0	0.0	0.0	0.0	0.0	0.0	1.807831163032022e-06	0.0	0.0	0.0
L(178)	7.231324652128088e-06	F:7.231324652128088e-06	0.0	0.0	0.0	0.0	7.231324652128088e-06	0.0	0.0	0.0	0.0	0.0	0.0	0.0	0.0	0.0	0.0	0.0	0.0	0.0	0.0	0.0
S(425)	7.231324652128088e-06	F:5.4234934890960665e-06 , P:1.807831163032022e-06	0.0	0.0	0.0	0.0	5.4234934890960665e-06	0.0	0.0	0.0	0.0	0.0	0.0	0.0	0.0	0.0	0.0	0.0	0.0	0.0	1.807831163032022e-06	0.0
L(854)	7.231324652128088e-06	F:5.4234934890960665e-06 , H:1.807831163032022e-06	0.0	0.0	0.0	0.0	5.4234934890960665e-06	0.0	0.0	0.0	1.807831163032022e-06	0.0	0.0	0.0	0.0	0.0	0.0	0.0	0.0	0.0	0.0	0.0
R(18)	7.231324652128088e-06	L:3.615662326064044e-06 , C:1.807831163032022e-06 , G:1.807831163032022e-06	3.615662326064044e-06	0.0	0.0	0.0	0.0	1.807831163032022e-06	0.0	0.0	0.0	0.0	0.0	1.807831163032022e-06	0.0	0.0	0.0	0.0	0.0	0.0	0.0	0.0
E(180)	7.231324652128088e-06	V:1.807831163032022e-06 , A:1.807831163032022e-06 , G:1.807831163032022e-06 , D:1.807831163032022e-06	0.0	0.0	1.807831163032022e-06	0.0	0.0	0.0	0.0	0.0	0.0	0.0	1.807831163032022e-06	1.807831163032022e-06	1.807831163032022e-06	0.0	0.0	0.0	0.0	0.0	0.0	0.0
G(852)	7.231324652128088e-06	V:1.807831163032022e-06 , S:3.615662326064044e-06 , C:1.807831163032022e-06	0.0	0.0	1.807831163032022e-06	3.615662326064044e-06	0.0	1.807831163032022e-06	0.0	0.0	0.0	0.0	0.0	0.0	0.0	0.0	0.0	0.0	0.0	0.0	0.0	0.0
A(685)	7.231324652128088e-06	S:7.231324652128088e-06	0.0	0.0	0.0	7.231324652128088e-06	0.0	0.0	0.0	0.0	0.0	0.0	0.0	0.0	0.0	0.0	0.0	0.0	0.0	0.0	0.0	0.0
L(119)	7.231324652128088e-06	I:7.231324652128088e-06	0.0	7.231324652128088e-06	0.0	0.0	0.0	0.0	0.0	0.0	0.0	0.0	0.0	0.0	0.0	0.0	0.0	0.0	0.0	0.0	0.0	0.0
L(470)	5.4234934890960665e-06	I:1.807831163032022e-06 , R:1.807831163032022e-06 , Q:1.807831163032022e-06	0.0	1.807831163032022e-06	0.0	0.0	0.0	0.0	0.0	0.0	0.0	0.0	0.0	0.0	0.0	1.807831163032022e-06	0.0	0.0	0.0	1.807831163032022e-06	0.0	0.0
H(99)	5.4234934890960665e-06	Y:3.615662326064044e-06 , N:1.807831163032022e-06	0.0	0.0	0.0	0.0	0.0	0.0	3.615662326064044e-06	1.807831163032022e-06	0.0	0.0	0.0	0.0	0.0	0.0	0.0	0.0	0.0	0.0	0.0	0.0
R(33)	5.4234934890960665e-06	S:1.807831163032022e-06 , G:1.807831163032022e-06 , M:1.807831163032022e-06	0.0	0.0	0.0	1.807831163032022e-06	0.0	0.0	0.0	0.0	0.0	0.0	0.0	1.807831163032022e-06	0.0	0.0	1.807831163032022e-06	0.0	0.0	0.0	0.0	0.0
L(280)	5.4234934890960665e-06	S:3.615662326064044e-06 , K:1.807831163032022e-06	0.0	0.0	0.0	3.615662326064044e-06	0.0	0.0	0.0	0.0	0.0	0.0	0.0	0.0	0.0	0.0	0.0	0.0	1.807831163032022e-06	0.0	0.0	0.0
A(448)	5.4234934890960665e-06	V:5.4234934890960665e-06	0.0	0.0	5.4234934890960665e-06	0.0	0.0	0.0	0.0	0.0	0.0	0.0	0.0	0.0	0.0	0.0	0.0	0.0	0.0	0.0	0.0	0.0
L(361)	5.4234934890960665e-06	S:5.4234934890960665e-06	0.0	0.0	0.0	5.4234934890960665e-06	0.0	0.0	0.0	0.0	0.0	0.0	0.0	0.0	0.0	0.0	0.0	0.0	0.0	0.0	0.0	0.0
K(438)	5.4234934890960665e-06	R:5.4234934890960665e-06	0.0	0.0	0.0	0.0	0.0	0.0	0.0	0.0	0.0	0.0	0.0	0.0	0.0	5.4234934890960665e-06	0.0	0.0	0.0	0.0	0.0	0.0
C(765)	5.4234934890960665e-06	Y:3.615662326064044e-06 , R:1.807831163032022e-06	0.0	0.0	0.0	0.0	0.0	0.0	3.615662326064044e-06	0.0	0.0	0.0	0.0	0.0	0.0	1.807831163032022e-06	0.0	0.0	0.0	0.0	0.0	0.0
G(427)	5.4234934890960665e-06	V:1.807831163032022e-06 , S:1.807831163032022e-06 , C:1.807831163032022e-06	0.0	0.0	1.807831163032022e-06	1.807831163032022e-06	0.0	1.807831163032022e-06	0.0	0.0	0.0	0.0	0.0	0.0	0.0	0.0	0.0	0.0	0.0	0.0	0.0	0.0
A(747)	5.4234934890960665e-06	S:5.4234934890960665e-06	0.0	0.0	0.0	5.4234934890960665e-06	0.0	0.0	0.0	0.0	0.0	0.0	0.0	0.0	0.0	0.0	0.0	0.0	0.0	0.0	0.0	0.0
Q(570)	5.4234934890960665e-06	H:5.4234934890960665e-06	0.0	0.0	0.0	0.0	0.0	0.0	0.0	0.0	5.4234934890960665e-06	0.0	0.0	0.0	0.0	0.0	0.0	0.0	0.0	0.0	0.0	0.0
K(272)	5.4234934890960665e-06	R:1.807831163032022e-06 , E:3.615662326064044e-06	0.0	0.0	0.0	0.0	0.0	0.0	0.0	0.0	0.0	0.0	0.0	0.0	0.0	1.807831163032022e-06	0.0	3.615662326064044e-06	0.0	0.0	0.0	0.0
N(628)	5.4234934890960665e-06	S:5.4234934890960665e-06	0.0	0.0	0.0	5.4234934890960665e-06	0.0	0.0	0.0	0.0	0.0	0.0	0.0	0.0	0.0	0.0	0.0	0.0	0.0	0.0	0.0	0.0
H(642)	5.4234934890960665e-06	Y:3.615662326064044e-06 , D:1.807831163032022e-06	0.0	0.0	0.0	0.0	0.0	0.0	3.615662326064044e-06	0.0	0.0	0.0	0.0	0.0	1.807831163032022e-06	0.0	0.0	0.0	0.0	0.0	0.0	0.0
L(663)	5.4234934890960665e-06	F:5.4234934890960665e-06	0.0	0.0	0.0	0.0	5.4234934890960665e-06	0.0	0.0	0.0	0.0	0.0	0.0	0.0	0.0	0.0	0.0	0.0	0.0	0.0	0.0	0.0
S(664)	5.4234934890960665e-06	I:1.807831163032022e-06 , N:3.615662326064044e-06	0.0	1.807831163032022e-06	0.0	0.0	0.0	0.0	0.0	3.615662326064044e-06	0.0	0.0	0.0	0.0	0.0	0.0	0.0	0.0	0.0	0.0	0.0	0.0
S(236)	5.4234934890960665e-06	A:5.4234934890960665e-06	0.0	0.0	0.0	0.0	0.0	0.0	0.0	0.0	0.0	0.0	5.4234934890960665e-06	0.0	0.0	0.0	0.0	0.0	0.0	0.0	0.0	0.0
Y(925)	5.4234934890960665e-06	C:1.807831163032022e-06 , H:3.615662326064044e-06	0.0	0.0	0.0	0.0	0.0	1.807831163032022e-06	0.0	0.0	3.615662326064044e-06	0.0	0.0	0.0	0.0	0.0	0.0	0.0	0.0	0.0	0.0	0.0
K(411)	5.4234934890960665e-06	N:1.807831163032022e-06 , R:3.615662326064044e-06	0.0	0.0	0.0	0.0	0.0	0.0	0.0	1.807831163032022e-06	0.0	0.0	0.0	0.0	0.0	3.615662326064044e-06	0.0	0.0	0.0	0.0	0.0	0.0
D(465)	5.4234934890960665e-06	Y:3.615662326064044e-06 , H:1.807831163032022e-06	0.0	0.0	0.0	0.0	0.0	0.0	3.615662326064044e-06	0.0	1.807831163032022e-06	0.0	0.0	0.0	0.0	0.0	0.0	0.0	0.0	0.0	0.0	0.0
Y(674)	5.4234934890960665e-06	H:3.615662326064044e-06 , D:1.807831163032022e-06	0.0	0.0	0.0	0.0	0.0	0.0	0.0	0.0	3.615662326064044e-06	0.0	0.0	0.0	1.807831163032022e-06	0.0	0.0	0.0	0.0	0.0	0.0	0.0
Y(826)	5.4234934890960665e-06	C:1.807831163032022e-06 , H:3.615662326064044e-06	0.0	0.0	0.0	0.0	0.0	1.807831163032022e-06	0.0	0.0	3.615662326064044e-06	0.0	0.0	0.0	0.0	0.0	0.0	0.0	0.0	0.0	0.0	0.0
L(205)	5.4234934890960665e-06	V:1.807831163032022e-06 , M:3.615662326064044e-06	0.0	0.0	1.807831163032022e-06	0.0	0.0	0.0	0.0	0.0	0.0	0.0	0.0	0.0	0.0	0.0	3.615662326064044e-06	0.0	0.0	0.0	0.0	0.0
P(505)	5.4234934890960665e-06	L:1.807831163032022e-06 , S:3.615662326064044e-06	1.807831163032022e-06	0.0	0.0	3.615662326064044e-06	0.0	0.0	0.0	0.0	0.0	0.0	0.0	0.0	0.0	0.0	0.0	0.0	0.0	0.0	0.0	0.0
S(318)	5.4234934890960665e-06	F:1.807831163032022e-06 , A:3.615662326064044e-06	0.0	0.0	0.0	0.0	1.807831163032022e-06	0.0	0.0	0.0	0.0	0.0	3.615662326064044e-06	0.0	0.0	0.0	0.0	0.0	0.0	0.0	0.0	0.0
K(73)	5.4234934890960665e-06	N:1.807831163032022e-06 , M:1.807831163032022e-06 , E:1.807831163032022e-06	0.0	0.0	0.0	0.0	0.0	0.0	0.0	1.807831163032022e-06	0.0	0.0	0.0	0.0	0.0	0.0	1.807831163032022e-06	1.807831163032022e-06	0.0	0.0	0.0	0.0
A(512)	5.4234934890960665e-06	V:1.807831163032022e-06 , S:3.615662326064044e-06	0.0	0.0	1.807831163032022e-06	3.615662326064044e-06	0.0	0.0	0.0	0.0	0.0	0.0	0.0	0.0	0.0	0.0	0.0	0.0	0.0	0.0	0.0	0.0
E(58)	5.4234934890960665e-06	G:1.807831163032022e-06 , Q:3.615662326064044e-06	0.0	0.0	0.0	0.0	0.0	0.0	0.0	0.0	0.0	0.0	0.0	1.807831163032022e-06	0.0	0.0	0.0	0.0	0.0	3.615662326064044e-06	0.0	0.0
Q(724)	5.4234934890960665e-06	H:1.807831163032022e-06 , R:1.807831163032022e-06 , K:1.807831163032022e-06	0.0	0.0	0.0	0.0	0.0	0.0	0.0	0.0	1.807831163032022e-06	0.0	0.0	0.0	0.0	1.807831163032022e-06	0.0	0.0	1.807831163032022e-06	0.0	0.0	0.0
P(322)	5.4234934890960665e-06	L:3.615662326064044e-06 , S:1.807831163032022e-06	3.615662326064044e-06	0.0	0.0	1.807831163032022e-06	0.0	0.0	0.0	0.0	0.0	0.0	0.0	0.0	0.0	0.0	0.0	0.0	0.0	0.0	0.0	0.0
P(868)	5.4234934890960665e-06	L:5.4234934890960665e-06	5.4234934890960665e-06	0.0	0.0	0.0	0.0	0.0	0.0	0.0	0.0	0.0	0.0	0.0	0.0	0.0	0.0	0.0	0.0	0.0	0.0	0.0
W(617)	5.4234934890960665e-06	L:3.615662326064044e-06 , C:1.807831163032022e-06	3.615662326064044e-06	0.0	0.0	0.0	0.0	1.807831163032022e-06	0.0	0.0	0.0	0.0	0.0	0.0	0.0	0.0	0.0	0.0	0.0	0.0	0.0	0.0
Y(530)	5.4234934890960665e-06	S:1.807831163032022e-06 , C:1.807831163032022e-06 , R:1.807831163032022e-06	0.0	0.0	0.0	1.807831163032022e-06	0.0	1.807831163032022e-06	0.0	0.0	0.0	0.0	0.0	0.0	0.0	1.807831163032022e-06	0.0	0.0	0.0	0.0	0.0	0.0
S(592)	5.4234934890960665e-06	G:3.615662326064044e-06 , R:1.807831163032022e-06	0.0	0.0	0.0	0.0	0.0	0.0	0.0	0.0	0.0	0.0	0.0	3.615662326064044e-06	0.0	1.807831163032022e-06	0.0	0.0	0.0	0.0	0.0	0.0
L(575)	5.4234934890960665e-06	I:1.807831163032022e-06 , S:3.615662326064044e-06	0.0	1.807831163032022e-06	0.0	3.615662326064044e-06	0.0	0.0	0.0	0.0	0.0	0.0	0.0	0.0	0.0	0.0	0.0	0.0	0.0	0.0	0.0	0.0
P(339)	5.4234934890960665e-06	S:5.4234934890960665e-06	0.0	0.0	0.0	5.4234934890960665e-06	0.0	0.0	0.0	0.0	0.0	0.0	0.0	0.0	0.0	0.0	0.0	0.0	0.0	0.0	0.0	0.0
N(168)	5.4234934890960665e-06	S:1.807831163032022e-06 , D:3.615662326064044e-06	0.0	0.0	0.0	1.807831163032022e-06	0.0	0.0	0.0	0.0	0.0	0.0	0.0	0.0	3.615662326064044e-06	0.0	0.0	0.0	0.0	0.0	0.0	0.0
P(620)	5.4234934890960665e-06	L:3.615662326064044e-06 , S:1.807831163032022e-06	3.615662326064044e-06	0.0	0.0	1.807831163032022e-06	0.0	0.0	0.0	0.0	0.0	0.0	0.0	0.0	0.0	0.0	0.0	0.0	0.0	0.0	0.0	0.0
L(8)	3.615662326064044e-06	S:1.807831163032022e-06 , F:1.807831163032022e-06	0.0	0.0	0.0	1.807831163032022e-06	1.807831163032022e-06	0.0	0.0	0.0	0.0	0.0	0.0	0.0	0.0	0.0	0.0	0.0	0.0	0.0	0.0	0.0
A(17)	3.615662326064044e-06	V:1.807831163032022e-06 , D:1.807831163032022e-06	0.0	0.0	1.807831163032022e-06	0.0	0.0	0.0	0.0	0.0	0.0	0.0	0.0	0.0	1.807831163032022e-06	0.0	0.0	0.0	0.0	0.0	0.0	0.0
G(13)	3.615662326064044e-06	S:1.807831163032022e-06 , R:1.807831163032022e-06	0.0	0.0	0.0	1.807831163032022e-06	0.0	0.0	0.0	0.0	0.0	0.0	0.0	0.0	0.0	1.807831163032022e-06	0.0	0.0	0.0	0.0	0.0	0.0
G(230)	3.615662326064044e-06	V:3.615662326064044e-06	0.0	0.0	3.615662326064044e-06	0.0	0.0	0.0	0.0	0.0	0.0	0.0	0.0	0.0	0.0	0.0	0.0	0.0	0.0	0.0	0.0	0.0
N(9)	3.615662326064044e-06	S:1.807831163032022e-06 , K:1.807831163032022e-06	0.0	0.0	0.0	1.807831163032022e-06	0.0	0.0	0.0	0.0	0.0	0.0	0.0	0.0	0.0	0.0	0.0	0.0	1.807831163032022e-06	0.0	0.0	0.0
R(10)	3.615662326064044e-06	P:1.807831163032022e-06 , W:1.807831163032022e-06	0.0	0.0	0.0	0.0	0.0	0.0	0.0	0.0	0.0	0.0	0.0	0.0	0.0	0.0	0.0	0.0	0.0	0.0	1.807831163032022e-06	1.807831163032022e-06
T(701)	3.615662326064044e-06	A:3.615662326064044e-06	0.0	0.0	0.0	0.0	0.0	0.0	0.0	0.0	0.0	0.0	3.615662326064044e-06	0.0	0.0	0.0	0.0	0.0	0.0	0.0	0.0	0.0
Y(748)	3.615662326064044e-06	H:3.615662326064044e-06	0.0	0.0	0.0	0.0	0.0	0.0	0.0	0.0	3.615662326064044e-06	0.0	0.0	0.0	0.0	0.0	0.0	0.0	0.0	0.0	0.0	0.0
T(687)	3.615662326064044e-06	I:3.615662326064044e-06	0.0	3.615662326064044e-06	0.0	0.0	0.0	0.0	0.0	0.0	0.0	0.0	0.0	0.0	0.0	0.0	0.0	0.0	0.0	0.0	0.0	0.0
L(708)	3.615662326064044e-06	S:3.615662326064044e-06	0.0	0.0	0.0	3.615662326064044e-06	0.0	0.0	0.0	0.0	0.0	0.0	0.0	0.0	0.0	0.0	0.0	0.0	0.0	0.0	0.0	0.0
N(695)	3.615662326064044e-06	D:3.615662326064044e-06	0.0	0.0	0.0	0.0	0.0	0.0	0.0	0.0	0.0	0.0	0.0	0.0	3.615662326064044e-06	0.0	0.0	0.0	0.0	0.0	0.0	0.0
F(881)	3.615662326064044e-06	L:1.807831163032022e-06 , S:1.807831163032022e-06	1.807831163032022e-06	0.0	0.0	1.807831163032022e-06	0.0	0.0	0.0	0.0	0.0	0.0	0.0	0.0	0.0	0.0	0.0	0.0	0.0	0.0	0.0	0.0
G(897)	3.615662326064044e-06	E:3.615662326064044e-06	0.0	0.0	0.0	0.0	0.0	0.0	0.0	0.0	0.0	0.0	0.0	0.0	0.0	0.0	0.0	3.615662326064044e-06	0.0	0.0	0.0	0.0
H(898)	3.615662326064044e-06	L:1.807831163032022e-06 , Y:1.807831163032022e-06	1.807831163032022e-06	0.0	0.0	0.0	0.0	0.0	1.807831163032022e-06	0.0	0.0	0.0	0.0	0.0	0.0	0.0	0.0	0.0	0.0	0.0	0.0	0.0
Y(903)	3.615662326064044e-06	C:3.615662326064044e-06	0.0	0.0	0.0	0.0	0.0	3.615662326064044e-06	0.0	0.0	0.0	0.0	0.0	0.0	0.0	0.0	0.0	0.0	0.0	0.0	0.0	0.0
A(688)	3.615662326064044e-06	S:3.615662326064044e-06	0.0	0.0	0.0	3.615662326064044e-06	0.0	0.0	0.0	0.0	0.0	0.0	0.0	0.0	0.0	0.0	0.0	0.0	0.0	0.0	0.0	0.0
L(172)	3.615662326064044e-06	V:1.807831163032022e-06 , S:1.807831163032022e-06	0.0	0.0	1.807831163032022e-06	1.807831163032022e-06	0.0	0.0	0.0	0.0	0.0	0.0	0.0	0.0	0.0	0.0	0.0	0.0	0.0	0.0	0.0	0.0
Y(921)	3.615662326064044e-06	F:1.807831163032022e-06 , K:1.807831163032022e-06	0.0	0.0	0.0	0.0	1.807831163032022e-06	0.0	0.0	0.0	0.0	0.0	0.0	0.0	0.0	0.0	0.0	0.0	1.807831163032022e-06	0.0	0.0	0.0
R(183)	3.615662326064044e-06	L:1.807831163032022e-06 , C:1.807831163032022e-06	1.807831163032022e-06	0.0	0.0	0.0	0.0	1.807831163032022e-06	0.0	0.0	0.0	0.0	0.0	0.0	0.0	0.0	0.0	0.0	0.0	0.0	0.0	0.0
G(678)	3.615662326064044e-06	S:1.807831163032022e-06 , C:1.807831163032022e-06	0.0	0.0	0.0	1.807831163032022e-06	0.0	1.807831163032022e-06	0.0	0.0	0.0	0.0	0.0	0.0	0.0	0.0	0.0	0.0	0.0	0.0	0.0	0.0
D(211)	3.615662326064044e-06	G:1.807831163032022e-06 , E:1.807831163032022e-06	0.0	0.0	0.0	0.0	0.0	0.0	0.0	0.0	0.0	0.0	0.0	1.807831163032022e-06	0.0	0.0	0.0	1.807831163032022e-06	0.0	0.0	0.0	0.0
L(731)	3.615662326064044e-06	I:3.615662326064044e-06	0.0	3.615662326064044e-06	0.0	0.0	0.0	0.0	0.0	0.0	0.0	0.0	0.0	0.0	0.0	0.0	0.0	0.0	0.0	0.0	0.0	0.0
G(214)	3.615662326064044e-06	S:1.807831163032022e-06 , A:1.807831163032022e-06	0.0	0.0	0.0	1.807831163032022e-06	0.0	0.0	0.0	0.0	0.0	0.0	1.807831163032022e-06	0.0	0.0	0.0	0.0	0.0	0.0	0.0	0.0	0.0
D(218)	3.615662326064044e-06	Y:1.807831163032022e-06 , E:1.807831163032022e-06	0.0	0.0	0.0	0.0	0.0	0.0	1.807831163032022e-06	0.0	0.0	0.0	0.0	0.0	0.0	0.0	0.0	1.807831163032022e-06	0.0	0.0	0.0	0.0
F(219)	3.615662326064044e-06	L:3.615662326064044e-06	3.615662326064044e-06	0.0	0.0	0.0	0.0	0.0	0.0	0.0	0.0	0.0	0.0	0.0	0.0	0.0	0.0	0.0	0.0	0.0	0.0	0.0
K(188)	3.615662326064044e-06	R:3.615662326064044e-06	0.0	0.0	0.0	0.0	0.0	0.0	0.0	0.0	0.0	0.0	0.0	0.0	0.0	3.615662326064044e-06	0.0	0.0	0.0	0.0	0.0	0.0
L(371)	3.615662326064044e-06	F:3.615662326064044e-06	0.0	0.0	0.0	0.0	3.615662326064044e-06	0.0	0.0	0.0	0.0	0.0	0.0	0.0	0.0	0.0	0.0	0.0	0.0	0.0	0.0	0.0
F(396)	3.615662326064044e-06	L:1.807831163032022e-06 , I:1.807831163032022e-06	1.807831163032022e-06	1.807831163032022e-06	0.0	0.0	0.0	0.0	0.0	0.0	0.0	0.0	0.0	0.0	0.0	0.0	0.0	0.0	0.0	0.0	0.0	0.0
A(502)	3.615662326064044e-06	V:1.807831163032022e-06 , S:1.807831163032022e-06	0.0	0.0	1.807831163032022e-06	1.807831163032022e-06	0.0	0.0	0.0	0.0	0.0	0.0	0.0	0.0	0.0	0.0	0.0	0.0	0.0	0.0	0.0	0.0
F(480)	3.615662326064044e-06	L:3.615662326064044e-06	3.615662326064044e-06	0.0	0.0	0.0	0.0	0.0	0.0	0.0	0.0	0.0	0.0	0.0	0.0	0.0	0.0	0.0	0.0	0.0	0.0	0.0
T(531)	3.615662326064044e-06	I:1.807831163032022e-06 , S:1.807831163032022e-06	0.0	1.807831163032022e-06	0.0	1.807831163032022e-06	0.0	0.0	0.0	0.0	0.0	0.0	0.0	0.0	0.0	0.0	0.0	0.0	0.0	0.0	0.0	0.0
C(645)	3.615662326064044e-06	F:1.807831163032022e-06 , R:1.807831163032022e-06	0.0	0.0	0.0	0.0	1.807831163032022e-06	0.0	0.0	0.0	0.0	0.0	0.0	0.0	0.0	1.807831163032022e-06	0.0	0.0	0.0	0.0	0.0	0.0
C(646)	3.615662326064044e-06	F:1.807831163032022e-06 , Y:1.807831163032022e-06	0.0	0.0	0.0	0.0	1.807831163032022e-06	0.0	1.807831163032022e-06	0.0	0.0	0.0	0.0	0.0	0.0	0.0	0.0	0.0	0.0	0.0	0.0	0.0
S(518)	3.615662326064044e-06	T:1.807831163032022e-06 , P:1.807831163032022e-06	0.0	0.0	0.0	0.0	0.0	0.0	0.0	0.0	0.0	1.807831163032022e-06	0.0	0.0	0.0	0.0	0.0	0.0	0.0	0.0	1.807831163032022e-06	0.0
H(309)	3.615662326064044e-06	Y:1.807831163032022e-06 , Q:1.807831163032022e-06	0.0	0.0	0.0	0.0	0.0	0.0	1.807831163032022e-06	0.0	0.0	0.0	0.0	0.0	0.0	0.0	0.0	0.0	0.0	1.807831163032022e-06	0.0	0.0
G(446)	3.615662326064044e-06	C:3.615662326064044e-06	0.0	0.0	0.0	0.0	0.0	3.615662326064044e-06	0.0	0.0	0.0	0.0	0.0	0.0	0.0	0.0	0.0	0.0	0.0	0.0	0.0	0.0
L(351)	3.615662326064044e-06	I:1.807831163032022e-06 , P:1.807831163032022e-06	0.0	1.807831163032022e-06	0.0	0.0	0.0	0.0	0.0	0.0	0.0	0.0	0.0	0.0	0.0	0.0	0.0	0.0	0.0	0.0	1.807831163032022e-06	0.0
K(508)	3.615662326064044e-06	R:3.615662326064044e-06	0.0	0.0	0.0	0.0	0.0	0.0	0.0	0.0	0.0	0.0	0.0	0.0	0.0	3.615662326064044e-06	0.0	0.0	0.0	0.0	0.0	0.0
Y(453)	3.615662326064044e-06	H:1.807831163032022e-06 , D:1.807831163032022e-06	0.0	0.0	0.0	0.0	0.0	0.0	0.0	0.0	1.807831163032022e-06	0.0	0.0	0.0	1.807831163032022e-06	0.0	0.0	0.0	0.0	0.0	0.0	0.0
Y(458)	3.615662326064044e-06	H:1.807831163032022e-06 , D:1.807831163032022e-06	0.0	0.0	0.0	0.0	0.0	0.0	0.0	0.0	1.807831163032022e-06	0.0	0.0	0.0	1.807831163032022e-06	0.0	0.0	0.0	0.0	0.0	0.0	0.0
F(313)	3.615662326064044e-06	L:3.615662326064044e-06	3.615662326064044e-06	0.0	0.0	0.0	0.0	0.0	0.0	0.0	0.0	0.0	0.0	0.0	0.0	0.0	0.0	0.0	0.0	0.0	0.0	0.0
S(501)	3.615662326064044e-06	L:3.615662326064044e-06	3.615662326064044e-06	0.0	0.0	0.0	0.0	0.0	0.0	0.0	0.0	0.0	0.0	0.0	0.0	0.0	0.0	0.0	0.0	0.0	0.0	0.0
L(602)	3.615662326064044e-06	V:1.807831163032022e-06 , S:1.807831163032022e-06	0.0	0.0	1.807831163032022e-06	1.807831163032022e-06	0.0	0.0	0.0	0.0	0.0	0.0	0.0	0.0	0.0	0.0	0.0	0.0	0.0	0.0	0.0	0.0
L(316)	3.615662326064044e-06	S:1.807831163032022e-06 , F:1.807831163032022e-06	0.0	0.0	0.0	1.807831163032022e-06	1.807831163032022e-06	0.0	0.0	0.0	0.0	0.0	0.0	0.0	0.0	0.0	0.0	0.0	0.0	0.0	0.0	0.0
L(498)	3.615662326064044e-06	I:3.615662326064044e-06	0.0	3.615662326064044e-06	0.0	0.0	0.0	0.0	0.0	0.0	0.0	0.0	0.0	0.0	0.0	0.0	0.0	0.0	0.0	0.0	0.0	0.0
D(618)	3.615662326064044e-06	V:1.807831163032022e-06 , Y:1.807831163032022e-06	0.0	0.0	1.807831163032022e-06	0.0	0.0	0.0	1.807831163032022e-06	0.0	0.0	0.0	0.0	0.0	0.0	0.0	0.0	0.0	0.0	0.0	0.0	0.0
F(317)	3.615662326064044e-06	L:1.807831163032022e-06 , I:1.807831163032022e-06	1.807831163032022e-06	1.807831163032022e-06	0.0	0.0	0.0	0.0	0.0	0.0	0.0	0.0	0.0	0.0	0.0	0.0	0.0	0.0	0.0	0.0	0.0	0.0
F(652)	3.615662326064044e-06	L:3.615662326064044e-06	3.615662326064044e-06	0.0	0.0	0.0	0.0	0.0	0.0	0.0	0.0	0.0	0.0	0.0	0.0	0.0	0.0	0.0	0.0	0.0	0.0	0.0
Y(619)	3.615662326064044e-06	F:3.615662326064044e-06	0.0	0.0	0.0	0.0	3.615662326064044e-06	0.0	0.0	0.0	0.0	0.0	0.0	0.0	0.0	0.0	0.0	0.0	0.0	0.0	0.0	0.0
G(486)	3.615662326064044e-06	C:1.807831163032022e-06 , R:1.807831163032022e-06	0.0	0.0	0.0	0.0	0.0	1.807831163032022e-06	0.0	0.0	0.0	0.0	0.0	0.0	0.0	1.807831163032022e-06	0.0	0.0	0.0	0.0	0.0	0.0
G(337)	3.615662326064044e-06	V:1.807831163032022e-06 , C:1.807831163032022e-06	0.0	0.0	1.807831163032022e-06	0.0	0.0	1.807831163032022e-06	0.0	0.0	0.0	0.0	0.0	0.0	0.0	0.0	0.0	0.0	0.0	0.0	0.0	0.0
D(336)	3.615662326064044e-06	Y:1.807831163032022e-06 , G:1.807831163032022e-06	0.0	0.0	0.0	0.0	0.0	0.0	1.807831163032022e-06	0.0	0.0	0.0	0.0	1.807831163032022e-06	0.0	0.0	0.0	0.0	0.0	0.0	0.0	0.0
V(475)	3.615662326064044e-06	I:3.615662326064044e-06	0.0	3.615662326064044e-06	0.0	0.0	0.0	0.0	0.0	0.0	0.0	0.0	0.0	0.0	0.0	0.0	0.0	0.0	0.0	0.0	0.0	0.0
Y(483)	3.615662326064044e-06	F:1.807831163032022e-06 , C:1.807831163032022e-06	0.0	0.0	0.0	0.0	1.807831163032022e-06	1.807831163032022e-06	0.0	0.0	0.0	0.0	0.0	0.0	0.0	0.0	0.0	0.0	0.0	0.0	0.0	0.0
R(331)	3.615662326064044e-06	K:3.615662326064044e-06	0.0	0.0	0.0	0.0	0.0	0.0	0.0	0.0	0.0	0.0	0.0	0.0	0.0	0.0	0.0	0.0	3.615662326064044e-06	0.0	0.0	0.0
K(532)	3.615662326064044e-06	R:1.807831163032022e-06 , E:1.807831163032022e-06	0.0	0.0	0.0	0.0	0.0	0.0	0.0	0.0	0.0	0.0	0.0	0.0	0.0	1.807831163032022e-06	0.0	1.807831163032022e-06	0.0	0.0	0.0	0.0
C(298)	3.615662326064044e-06	F:3.615662326064044e-06	0.0	0.0	0.0	0.0	3.615662326064044e-06	0.0	0.0	0.0	0.0	0.0	0.0	0.0	0.0	0.0	0.0	0.0	0.0	0.0	0.0	0.0
K(332)	3.615662326064044e-06	R:1.807831163032022e-06 , Q:1.807831163032022e-06	0.0	0.0	0.0	0.0	0.0	0.0	0.0	0.0	0.0	0.0	0.0	0.0	0.0	1.807831163032022e-06	0.0	0.0	0.0	1.807831163032022e-06	0.0	0.0
A(840)	3.615662326064044e-06	V:1.807831163032022e-06 , D:1.807831163032022e-06	0.0	0.0	1.807831163032022e-06	0.0	0.0	0.0	0.0	0.0	0.0	0.0	0.0	0.0	1.807831163032022e-06	0.0	0.0	0.0	0.0	0.0	0.0	0.0
S(759)	3.615662326064044e-06	F:1.807831163032022e-06 , P:1.807831163032022e-06	0.0	0.0	0.0	0.0	1.807831163032022e-06	0.0	0.0	0.0	0.0	0.0	0.0	0.0	0.0	0.0	0.0	0.0	0.0	0.0	1.807831163032022e-06	0.0
F(407)	3.615662326064044e-06	S:1.807831163032022e-06 , K:1.807831163032022e-06	0.0	0.0	0.0	1.807831163032022e-06	0.0	0.0	0.0	0.0	0.0	0.0	0.0	0.0	0.0	0.0	0.0	0.0	1.807831163032022e-06	0.0	0.0	0.0
S(635)	3.615662326064044e-06	T:3.615662326064044e-06	0.0	0.0	0.0	0.0	0.0	0.0	0.0	0.0	0.0	3.615662326064044e-06	0.0	0.0	0.0	0.0	0.0	0.0	0.0	0.0	0.0	0.0
K(574)	3.615662326064044e-06	Q:3.615662326064044e-06	0.0	0.0	0.0	0.0	0.0	0.0	0.0	0.0	0.0	0.0	0.0	0.0	0.0	0.0	0.0	0.0	0.0	3.615662326064044e-06	0.0	0.0
D(760)	3.615662326064044e-06	Y:1.807831163032022e-06 , E:1.807831163032022e-06	0.0	0.0	0.0	0.0	0.0	0.0	1.807831163032022e-06	0.0	0.0	0.0	0.0	0.0	0.0	0.0	0.0	1.807831163032022e-06	0.0	0.0	0.0	0.0
K(577)	3.615662326064044e-06	R:3.615662326064044e-06	0.0	0.0	0.0	0.0	0.0	0.0	0.0	0.0	0.0	0.0	0.0	0.0	0.0	3.615662326064044e-06	0.0	0.0	0.0	0.0	0.0	0.0
F(766)	3.615662326064044e-06	I:1.807831163032022e-06 , S:1.807831163032022e-06	0.0	1.807831163032022e-06	0.0	1.807831163032022e-06	0.0	0.0	0.0	0.0	0.0	0.0	0.0	0.0	0.0	0.0	0.0	0.0	0.0	0.0	0.0	0.0
C(842)	3.615662326064044e-06	F:3.615662326064044e-06	0.0	0.0	0.0	0.0	3.615662326064044e-06	0.0	0.0	0.0	0.0	0.0	0.0	0.0	0.0	0.0	0.0	0.0	0.0	0.0	0.0	0.0
A(580)	3.615662326064044e-06	V:1.807831163032022e-06 , S:1.807831163032022e-06	0.0	0.0	1.807831163032022e-06	1.807831163032022e-06	0.0	0.0	0.0	0.0	0.0	0.0	0.0	0.0	0.0	0.0	0.0	0.0	0.0	0.0	0.0	0.0
L(786)	3.615662326064044e-06	I:1.807831163032022e-06 , V:1.807831163032022e-06	0.0	1.807831163032022e-06	1.807831163032022e-06	0.0	0.0	0.0	0.0	0.0	0.0	0.0	0.0	0.0	0.0	0.0	0.0	0.0	0.0	0.0	0.0	0.0
D(851)	3.615662326064044e-06	A:3.615662326064044e-06	0.0	0.0	0.0	0.0	0.0	0.0	0.0	0.0	0.0	0.0	3.615662326064044e-06	0.0	0.0	0.0	0.0	0.0	0.0	0.0	0.0	0.0
S(564)	3.615662326064044e-06	C:3.615662326064044e-06	0.0	0.0	0.0	0.0	0.0	3.615662326064044e-06	0.0	0.0	0.0	0.0	0.0	0.0	0.0	0.0	0.0	0.0	0.0	0.0	0.0	0.0
D(390)	3.615662326064044e-06	N:1.807831163032022e-06 , E:1.807831163032022e-06	0.0	0.0	0.0	0.0	0.0	0.0	0.0	1.807831163032022e-06	0.0	0.0	0.0	0.0	0.0	0.0	0.0	1.807831163032022e-06	0.0	0.0	0.0	0.0
F(782)	3.615662326064044e-06	L:3.615662326064044e-06	3.615662326064044e-06	0.0	0.0	0.0	0.0	0.0	0.0	0.0	0.0	0.0	0.0	0.0	0.0	0.0	0.0	0.0	0.0	0.0	0.0	0.0
P(243)	3.615662326064044e-06	L:1.807831163032022e-06 , S:1.807831163032022e-06	1.807831163032022e-06	0.0	0.0	1.807831163032022e-06	0.0	0.0	0.0	0.0	0.0	0.0	0.0	0.0	0.0	0.0	0.0	0.0	0.0	0.0	0.0	0.0
M(242)	3.615662326064044e-06	L:1.807831163032022e-06 , K:1.807831163032022e-06	1.807831163032022e-06	0.0	0.0	0.0	0.0	0.0	0.0	0.0	0.0	0.0	0.0	0.0	0.0	0.0	0.0	0.0	1.807831163032022e-06	0.0	0.0	0.0
V(398)	3.615662326064044e-06	I:3.615662326064044e-06	0.0	3.615662326064044e-06	0.0	0.0	0.0	0.0	0.0	0.0	0.0	0.0	0.0	0.0	0.0	0.0	0.0	0.0	0.0	0.0	0.0	0.0
K(545)	3.615662326064044e-06	N:1.807831163032022e-06 , R:1.807831163032022e-06	0.0	0.0	0.0	0.0	0.0	0.0	0.0	1.807831163032022e-06	0.0	0.0	0.0	0.0	0.0	1.807831163032022e-06	0.0	0.0	0.0	0.0	0.0	0.0
W(598)	3.615662326064044e-06	L:3.615662326064044e-06	3.615662326064044e-06	0.0	0.0	0.0	0.0	0.0	0.0	0.0	0.0	0.0	0.0	0.0	0.0	0.0	0.0	0.0	0.0	0.0	0.0	0.0
C(813)	1.807831163032022e-06	F:1.807831163032022e-06	0.0	0.0	0.0	0.0	1.807831163032022e-06	0.0	0.0	0.0	0.0	0.0	0.0	0.0	0.0	0.0	0.0	0.0	0.0	0.0	0.0	0.0
Q(815)	1.807831163032022e-06	R:1.807831163032022e-06	0.0	0.0	0.0	0.0	0.0	0.0	0.0	0.0	0.0	0.0	0.0	0.0	0.0	1.807831163032022e-06	0.0	0.0	0.0	0.0	0.0	0.0
M(626)	1.807831163032022e-06	I:1.807831163032022e-06	0.0	1.807831163032022e-06	0.0	0.0	0.0	0.0	0.0	0.0	0.0	0.0	0.0	0.0	0.0	0.0	0.0	0.0	0.0	0.0	0.0	0.0
K(798)	1.807831163032022e-06	T:1.807831163032022e-06	0.0	0.0	0.0	0.0	0.0	0.0	0.0	0.0	0.0	1.807831163032022e-06	0.0	0.0	0.0	0.0	0.0	0.0	0.0	0.0	0.0	0.0
L(437)	1.807831163032022e-06	S:1.807831163032022e-06	0.0	0.0	0.0	1.807831163032022e-06	0.0	0.0	0.0	0.0	0.0	0.0	0.0	0.0	0.0	0.0	0.0	0.0	0.0	0.0	0.0	0.0
F(415)	1.807831163032022e-06	V:1.807831163032022e-06	0.0	0.0	1.807831163032022e-06	0.0	0.0	0.0	0.0	0.0	0.0	0.0	0.0	0.0	0.0	0.0	0.0	0.0	0.0	0.0	0.0	0.0
D(452)	1.807831163032022e-06	Y:1.807831163032022e-06	0.0	0.0	0.0	0.0	0.0	0.0	1.807831163032022e-06	0.0	0.0	0.0	0.0	0.0	0.0	0.0	0.0	0.0	0.0	0.0	0.0	0.0
D(126)	1.807831163032022e-06	A:1.807831163032022e-06	0.0	0.0	0.0	0.0	0.0	0.0	0.0	0.0	0.0	0.0	1.807831163032022e-06	0.0	0.0	0.0	0.0	0.0	0.0	0.0	0.0	0.0
D(623)	1.807831163032022e-06	Y:1.807831163032022e-06	0.0	0.0	0.0	0.0	0.0	0.0	1.807831163032022e-06	0.0	0.0	0.0	0.0	0.0	0.0	0.0	0.0	0.0	0.0	0.0	0.0	0.0
G(808)	1.807831163032022e-06	S:1.807831163032022e-06	0.0	0.0	0.0	1.807831163032022e-06	0.0	0.0	0.0	0.0	0.0	0.0	0.0	0.0	0.0	0.0	0.0	0.0	0.0	0.0	0.0	0.0
R(631)	1.807831163032022e-06	K:1.807831163032022e-06	0.0	0.0	0.0	0.0	0.0	0.0	0.0	0.0	0.0	0.0	0.0	0.0	0.0	0.0	0.0	0.0	1.807831163032022e-06	0.0	0.0	0.0
Y(420)	1.807831163032022e-06	S:1.807831163032022e-06	0.0	0.0	0.0	1.807831163032022e-06	0.0	0.0	0.0	0.0	0.0	0.0	0.0	0.0	0.0	0.0	0.0	0.0	0.0	0.0	0.0	0.0
L(891)	1.807831163032022e-06	I:1.807831163032022e-06	0.0	1.807831163032022e-06	0.0	0.0	0.0	0.0	0.0	0.0	0.0	0.0	0.0	0.0	0.0	0.0	0.0	0.0	0.0	0.0	0.0	0.0
G(432)	1.807831163032022e-06	V:1.807831163032022e-06	0.0	0.0	1.807831163032022e-06	0.0	0.0	0.0	0.0	0.0	0.0	0.0	0.0	0.0	0.0	0.0	0.0	0.0	0.0	0.0	0.0	0.0
W(800)	1.807831163032022e-06	S:1.807831163032022e-06	0.0	0.0	0.0	1.807831163032022e-06	0.0	0.0	0.0	0.0	0.0	0.0	0.0	0.0	0.0	0.0	0.0	0.0	0.0	0.0	0.0	0.0
L(241)	1.807831163032022e-06	F:1.807831163032022e-06	0.0	0.0	0.0	0.0	1.807831163032022e-06	0.0	0.0	0.0	0.0	0.0	0.0	0.0	0.0	0.0	0.0	0.0	0.0	0.0	0.0	0.0
L(907)	1.807831163032022e-06	P:1.807831163032022e-06	0.0	0.0	0.0	0.0	0.0	0.0	0.0	0.0	0.0	0.0	0.0	0.0	0.0	0.0	0.0	0.0	0.0	0.0	1.807831163032022e-06	0.0
G(485)	1.807831163032022e-06	R:1.807831163032022e-06	0.0	0.0	0.0	0.0	0.0	0.0	0.0	0.0	0.0	0.0	0.0	0.0	0.0	1.807831163032022e-06	0.0	0.0	0.0	0.0	0.0	0.0
G(590)	1.807831163032022e-06	V:1.807831163032022e-06	0.0	0.0	1.807831163032022e-06	0.0	0.0	0.0	0.0	0.0	0.0	0.0	0.0	0.0	0.0	0.0	0.0	0.0	0.0	0.0	0.0	0.0
S(784)	1.807831163032022e-06	T:1.807831163032022e-06	0.0	0.0	0.0	0.0	0.0	0.0	0.0	0.0	0.0	1.807831163032022e-06	0.0	0.0	0.0	0.0	0.0	0.0	0.0	0.0	0.0	0.0
V(785)	1.807831163032022e-06	A:1.807831163032022e-06	0.0	0.0	0.0	0.0	0.0	0.0	0.0	0.0	0.0	0.0	1.807831163032022e-06	0.0	0.0	0.0	0.0	0.0	0.0	0.0	0.0	0.0
Q(573)	1.807831163032022e-06	K:1.807831163032022e-06	0.0	0.0	0.0	0.0	0.0	0.0	0.0	0.0	0.0	0.0	0.0	0.0	0.0	0.0	0.0	0.0	1.807831163032022e-06	0.0	0.0	0.0
V(14)	1.807831163032022e-06	C:1.807831163032022e-06	0.0	0.0	0.0	0.0	0.0	1.807831163032022e-06	0.0	0.0	0.0	0.0	0.0	0.0	0.0	0.0	0.0	0.0	0.0	0.0	0.0	0.0
N(568)	1.807831163032022e-06	Y:1.807831163032022e-06	0.0	0.0	0.0	0.0	0.0	0.0	1.807831163032022e-06	0.0	0.0	0.0	0.0	0.0	0.0	0.0	0.0	0.0	0.0	0.0	0.0	0.0
L(19)	1.807831163032022e-06	F:1.807831163032022e-06	0.0	0.0	0.0	0.0	1.807831163032022e-06	0.0	0.0	0.0	0.0	0.0	0.0	0.0	0.0	0.0	0.0	0.0	0.0	0.0	0.0	0.0
T(567)	1.807831163032022e-06	P:1.807831163032022e-06	0.0	0.0	0.0	0.0	0.0	0.0	0.0	0.0	0.0	0.0	0.0	0.0	0.0	0.0	0.0	0.0	0.0	0.0	1.807831163032022e-06	0.0
T(565)	1.807831163032022e-06	I:1.807831163032022e-06	0.0	1.807831163032022e-06	0.0	0.0	0.0	0.0	0.0	0.0	0.0	0.0	0.0	0.0	0.0	0.0	0.0	0.0	0.0	0.0	0.0	0.0
G(559)	1.807831163032022e-06	D:1.807831163032022e-06	0.0	0.0	0.0	0.0	0.0	0.0	0.0	0.0	0.0	0.0	0.0	0.0	1.807831163032022e-06	0.0	0.0	0.0	0.0	0.0	0.0	0.0
A(558)	1.807831163032022e-06	S:1.807831163032022e-06	0.0	0.0	0.0	1.807831163032022e-06	0.0	0.0	0.0	0.0	0.0	0.0	0.0	0.0	0.0	0.0	0.0	0.0	0.0	0.0	0.0	0.0
R(553)	1.807831163032022e-06	S:1.807831163032022e-06	0.0	0.0	0.0	1.807831163032022e-06	0.0	0.0	0.0	0.0	0.0	0.0	0.0	0.0	0.0	0.0	0.0	0.0	0.0	0.0	0.0	0.0
N(552)	1.807831163032022e-06	D:1.807831163032022e-06	0.0	0.0	0.0	0.0	0.0	0.0	0.0	0.0	0.0	0.0	0.0	0.0	1.807831163032022e-06	0.0	0.0	0.0	0.0	0.0	0.0	0.0
Y(38)	1.807831163032022e-06	C:1.807831163032022e-06	0.0	0.0	0.0	0.0	0.0	1.807831163032022e-06	0.0	0.0	0.0	0.0	0.0	0.0	0.0	0.0	0.0	0.0	0.0	0.0	0.0	0.0
N(39)	1.807831163032022e-06	I:1.807831163032022e-06	0.0	1.807831163032022e-06	0.0	0.0	0.0	0.0	0.0	0.0	0.0	0.0	0.0	0.0	0.0	0.0	0.0	0.0	0.0	0.0	0.0	0.0
F(528)	1.807831163032022e-06	L:1.807831163032022e-06	1.807831163032022e-06	0.0	0.0	0.0	0.0	0.0	0.0	0.0	0.0	0.0	0.0	0.0	0.0	0.0	0.0	0.0	0.0	0.0	0.0	0.0
C(53)	1.807831163032022e-06	S:1.807831163032022e-06	0.0	0.0	0.0	1.807831163032022e-06	0.0	0.0	0.0	0.0	0.0	0.0	0.0	0.0	0.0	0.0	0.0	0.0	0.0	0.0	0.0	0.0
D(525)	1.807831163032022e-06	N:1.807831163032022e-06	0.0	0.0	0.0	0.0	0.0	0.0	0.0	1.807831163032022e-06	0.0	0.0	0.0	0.0	0.0	0.0	0.0	0.0	0.0	0.0	0.0	0.0
R(55)	1.807831163032022e-06	C:1.807831163032022e-06	0.0	0.0	0.0	0.0	0.0	1.807831163032022e-06	0.0	0.0	0.0	0.0	0.0	0.0	0.0	0.0	0.0	0.0	0.0	0.0	0.0	0.0
R(513)	1.807831163032022e-06	G:1.807831163032022e-06	0.0	0.0	0.0	0.0	0.0	0.0	0.0	0.0	0.0	0.0	0.0	1.807831163032022e-06	0.0	0.0	0.0	0.0	0.0	0.0	0.0	0.0
Y(915)	1.807831163032022e-06	C:1.807831163032022e-06	0.0	0.0	0.0	0.0	0.0	1.807831163032022e-06	0.0	0.0	0.0	0.0	0.0	0.0	0.0	0.0	0.0	0.0	0.0	0.0	0.0	0.0
L(749)	1.807831163032022e-06	V:1.807831163032022e-06	0.0	0.0	1.807831163032022e-06	0.0	0.0	0.0	0.0	0.0	0.0	0.0	0.0	0.0	0.0	0.0	0.0	0.0	0.0	0.0	0.0	0.0
Y(728)	1.807831163032022e-06	H:1.807831163032022e-06	0.0	0.0	0.0	0.0	0.0	0.0	0.0	0.0	1.807831163032022e-06	0.0	0.0	0.0	0.0	0.0	0.0	0.0	0.0	0.0	0.0	0.0
L(65)	1.807831163032022e-06	V:1.807831163032022e-06	0.0	0.0	1.807831163032022e-06	0.0	0.0	0.0	0.0	0.0	0.0	0.0	0.0	0.0	0.0	0.0	0.0	0.0	0.0	0.0	0.0	0.0
F(504)	1.807831163032022e-06	Y:1.807831163032022e-06	0.0	0.0	0.0	0.0	0.0	0.0	1.807831163032022e-06	0.0	0.0	0.0	0.0	0.0	0.0	0.0	0.0	0.0	0.0	0.0	0.0	0.0
K(751)	1.807831163032022e-06	R:1.807831163032022e-06	0.0	0.0	0.0	0.0	0.0	0.0	0.0	0.0	0.0	0.0	0.0	0.0	0.0	1.807831163032022e-06	0.0	0.0	0.0	0.0	0.0	0.0
S(397)	1.807831163032022e-06	L:1.807831163032022e-06	1.807831163032022e-06	0.0	0.0	0.0	0.0	0.0	0.0	0.0	0.0	0.0	0.0	0.0	0.0	0.0	0.0	0.0	0.0	0.0	0.0	0.0
H(752)	1.807831163032022e-06	Q:1.807831163032022e-06	0.0	0.0	0.0	0.0	0.0	0.0	0.0	0.0	0.0	0.0	0.0	0.0	0.0	0.0	0.0	0.0	0.0	1.807831163032022e-06	0.0	0.0
E(83)	1.807831163032022e-06	K:1.807831163032022e-06	0.0	0.0	0.0	0.0	0.0	0.0	0.0	0.0	0.0	0.0	0.0	0.0	0.0	0.0	0.0	0.0	1.807831163032022e-06	0.0	0.0	0.0
G(503)	1.807831163032022e-06	V:1.807831163032022e-06	0.0	0.0	1.807831163032022e-06	0.0	0.0	0.0	0.0	0.0	0.0	0.0	0.0	0.0	0.0	0.0	0.0	0.0	0.0	0.0	0.0	0.0
K(593)	1.807831163032022e-06	R:1.807831163032022e-06	0.0	0.0	0.0	0.0	0.0	0.0	0.0	0.0	0.0	0.0	0.0	0.0	0.0	1.807831163032022e-06	0.0	0.0	0.0	0.0	0.0	0.0
T(680)	1.807831163032022e-06	I:1.807831163032022e-06	0.0	1.807831163032022e-06	0.0	0.0	0.0	0.0	0.0	0.0	0.0	0.0	0.0	0.0	0.0	0.0	0.0	0.0	0.0	0.0	0.0	0.0
R(654)	1.807831163032022e-06	S:1.807831163032022e-06	0.0	0.0	0.0	1.807831163032022e-06	0.0	0.0	0.0	0.0	0.0	0.0	0.0	0.0	0.0	0.0	0.0	0.0	0.0	0.0	0.0	0.0
G(327)	1.807831163032022e-06	V:1.807831163032022e-06	0.0	0.0	1.807831163032022e-06	0.0	0.0	0.0	0.0	0.0	0.0	0.0	0.0	0.0	0.0	0.0	0.0	0.0	0.0	0.0	0.0	0.0
A(690)	1.807831163032022e-06	V:1.807831163032022e-06	0.0	0.0	1.807831163032022e-06	0.0	0.0	0.0	0.0	0.0	0.0	0.0	0.0	0.0	0.0	0.0	0.0	0.0	0.0	0.0	0.0	0.0
S(692)	1.807831163032022e-06	I:1.807831163032022e-06	0.0	1.807831163032022e-06	0.0	0.0	0.0	0.0	0.0	0.0	0.0	0.0	0.0	0.0	0.0	0.0	0.0	0.0	0.0	0.0	0.0	0.0
R(836)	1.807831163032022e-06	K:1.807831163032022e-06	0.0	0.0	0.0	0.0	0.0	0.0	0.0	0.0	0.0	0.0	0.0	0.0	0.0	0.0	0.0	0.0	1.807831163032022e-06	0.0	0.0	0.0
Y(217)	1.807831163032022e-06	C:1.807831163032022e-06	0.0	0.0	0.0	0.0	0.0	1.807831163032022e-06	0.0	0.0	0.0	0.0	0.0	0.0	0.0	0.0	0.0	0.0	0.0	0.0	0.0	0.0
F(843)	1.807831163032022e-06	L:1.807831163032022e-06	1.807831163032022e-06	0.0	0.0	0.0	0.0	0.0	0.0	0.0	0.0	0.0	0.0	0.0	0.0	0.0	0.0	0.0	0.0	0.0	0.0	0.0
G(683)	1.807831163032022e-06	A:1.807831163032022e-06	0.0	0.0	0.0	0.0	0.0	0.0	0.0	0.0	0.0	0.0	1.807831163032022e-06	0.0	0.0	0.0	0.0	0.0	0.0	0.0	0.0	0.0
Q(210)	1.807831163032022e-06	R:1.807831163032022e-06	0.0	0.0	0.0	0.0	0.0	0.0	0.0	0.0	0.0	0.0	0.0	0.0	0.0	1.807831163032022e-06	0.0	0.0	0.0	0.0	0.0	0.0
C(301)	1.807831163032022e-06	S:1.807831163032022e-06	0.0	0.0	0.0	1.807831163032022e-06	0.0	0.0	0.0	0.0	0.0	0.0	0.0	0.0	0.0	0.0	0.0	0.0	0.0	0.0	0.0	0.0
L(883)	1.807831163032022e-06	F:1.807831163032022e-06	0.0	0.0	0.0	0.0	1.807831163032022e-06	0.0	0.0	0.0	0.0	0.0	0.0	0.0	0.0	0.0	0.0	0.0	0.0	0.0	0.0	0.0
L(673)	1.807831163032022e-06	I:1.807831163032022e-06	0.0	1.807831163032022e-06	0.0	0.0	0.0	0.0	0.0	0.0	0.0	0.0	0.0	0.0	0.0	0.0	0.0	0.0	0.0	0.0	0.0	0.0
T(686)	1.807831163032022e-06	K:1.807831163032022e-06	0.0	0.0	0.0	0.0	0.0	0.0	0.0	0.0	0.0	0.0	0.0	0.0	0.0	0.0	0.0	0.0	1.807831163032022e-06	0.0	0.0	0.0
N(356)	1.807831163032022e-06	S:1.807831163032022e-06	0.0	0.0	0.0	1.807831163032022e-06	0.0	0.0	0.0	0.0	0.0	0.0	0.0	0.0	0.0	0.0	0.0	0.0	0.0	0.0	0.0	0.0
G(203)	1.807831163032022e-06	V:1.807831163032022e-06	0.0	0.0	1.807831163032022e-06	0.0	0.0	0.0	0.0	0.0	0.0	0.0	0.0	0.0	0.0	0.0	0.0	0.0	0.0	0.0	0.0	0.0
L(819)	1.807831163032022e-06	I:1.807831163032022e-06	0.0	1.807831163032022e-06	0.0	0.0	0.0	0.0	0.0	0.0	0.0	0.0	0.0	0.0	0.0	0.0	0.0	0.0	0.0	0.0	0.0	0.0
C(395)	1.807831163032022e-06	S:1.807831163032022e-06	0.0	0.0	0.0	1.807831163032022e-06	0.0	0.0	0.0	0.0	0.0	0.0	0.0	0.0	0.0	0.0	0.0	0.0	0.0	0.0	0.0	0.0
N(312)	1.807831163032022e-06	S:1.807831163032022e-06	0.0	0.0	0.0	1.807831163032022e-06	0.0	0.0	0.0	0.0	0.0	0.0	0.0	0.0	0.0	0.0	0.0	0.0	0.0	0.0	0.0	0.0
A(863)	1.807831163032022e-06	D:1.807831163032022e-06	0.0	0.0	0.0	0.0	0.0	0.0	0.0	0.0	0.0	0.0	0.0	0.0	1.807831163032022e-06	0.0	0.0	0.0	0.0	0.0	0.0	0.0
F(340)	1.807831163032022e-06	S:1.807831163032022e-06	0.0	0.0	0.0	1.807831163032022e-06	0.0	0.0	0.0	0.0	0.0	0.0	0.0	0.0	0.0	0.0	0.0	0.0	0.0	0.0	0.0	0.0
E(857)	1.807831163032022e-06	Q:1.807831163032022e-06	0.0	0.0	0.0	0.0	0.0	0.0	0.0	0.0	0.0	0.0	0.0	0.0	0.0	0.0	0.0	0.0	0.0	1.807831163032022e-06	0.0	0.0
L(388)	1.807831163032022e-06	S:1.807831163032022e-06	0.0	0.0	0.0	1.807831163032022e-06	0.0	0.0	0.0	0.0	0.0	0.0	0.0	0.0	0.0	0.0	0.0	0.0	0.0	0.0	0.0	0.0
L(251)	1.807831163032022e-06	F:1.807831163032022e-06	0.0	0.0	0.0	0.0	1.807831163032022e-06	0.0	0.0	0.0	0.0	0.0	0.0	0.0	0.0	0.0	0.0	0.0	0.0	0.0	0.0	0.0
C(193)	1.807831163032022e-06	S:1.807831163032022e-06	0.0	0.0	0.0	1.807831163032022e-06	0.0	0.0	0.0	0.0	0.0	0.0	0.0	0.0	0.0	0.0	0.0	0.0	0.0	0.0	0.0	0.0
L(389)	1.807831163032022e-06	P:1.807831163032022e-06	0.0	0.0	0.0	0.0	0.0	0.0	0.0	0.0	0.0	0.0	0.0	0.0	0.0	0.0	0.0	0.0	0.0	0.0	1.807831163032022e-06	0.0
D(761)	1.807831163032022e-06	Y:1.807831163032022e-06	0.0	0.0	0.0	0.0	0.0	0.0	1.807831163032022e-06	0.0	0.0	0.0	0.0	0.0	0.0	0.0	0.0	0.0	0.0	0.0	0.0	0.0
F(920)	0.0		0.0	0.0	0.0	0.0	0.0	0.0	0.0	0.0	0.0	0.0	0.0	0.0	0.0	0.0	0.0	0.0	0.0	0.0	0.0	0.0
Q(789)	0.0		0.0	0.0	0.0	0.0	0.0	0.0	0.0	0.0	0.0	0.0	0.0	0.0	0.0	0.0	0.0	0.0	0.0	0.0	0.0	0.0
D(208)	0.0		0.0	0.0	0.0	0.0	0.0	0.0	0.0	0.0	0.0	0.0	0.0	0.0	0.0	0.0	0.0	0.0	0.0	0.0	0.0	0.0
T(538)	0.0		0.0	0.0	0.0	0.0	0.0	0.0	0.0	0.0	0.0	0.0	0.0	0.0	0.0	0.0	0.0	0.0	0.0	0.0	0.0	0.0
Y(732)	0.0		0.0	0.0	0.0	0.0	0.0	0.0	0.0	0.0	0.0	0.0	0.0	0.0	0.0	0.0	0.0	0.0	0.0	0.0	0.0	0.0
Y(887)	0.0		0.0	0.0	0.0	0.0	0.0	0.0	0.0	0.0	0.0	0.0	0.0	0.0	0.0	0.0	0.0	0.0	0.0	0.0	0.0	0.0
F(45)	0.0		0.0	0.0	0.0	0.0	0.0	0.0	0.0	0.0	0.0	0.0	0.0	0.0	0.0	0.0	0.0	0.0	0.0	0.0	0.0	0.0
Q(661)	0.0		0.0	0.0	0.0	0.0	0.0	0.0	0.0	0.0	0.0	0.0	0.0	0.0	0.0	0.0	0.0	0.0	0.0	0.0	0.0	0.0
F(48)	0.0		0.0	0.0	0.0	0.0	0.0	0.0	0.0	0.0	0.0	0.0	0.0	0.0	0.0	0.0	0.0	0.0	0.0	0.0	0.0	0.0
N(790)	0.0		0.0	0.0	0.0	0.0	0.0	0.0	0.0	0.0	0.0	0.0	0.0	0.0	0.0	0.0	0.0	0.0	0.0	0.0	0.0	0.0
K(50)	0.0		0.0	0.0	0.0	0.0	0.0	0.0	0.0	0.0	0.0	0.0	0.0	0.0	0.0	0.0	0.0	0.0	0.0	0.0	0.0	0.0
N(52)	0.0		0.0	0.0	0.0	0.0	0.0	0.0	0.0	0.0	0.0	0.0	0.0	0.0	0.0	0.0	0.0	0.0	0.0	0.0	0.0	0.0
C(659)	0.0		0.0	0.0	0.0	0.0	0.0	0.0	0.0	0.0	0.0	0.0	0.0	0.0	0.0	0.0	0.0	0.0	0.0	0.0	0.0	0.0
G(200)	0.0		0.0	0.0	0.0	0.0	0.0	0.0	0.0	0.0	0.0	0.0	0.0	0.0	0.0	0.0	0.0	0.0	0.0	0.0	0.0	0.0
Y(516)	0.0		0.0	0.0	0.0	0.0	0.0	0.0	0.0	0.0	0.0	0.0	0.0	0.0	0.0	0.0	0.0	0.0	0.0	0.0	0.0	0.0
C(306)	0.0		0.0	0.0	0.0	0.0	0.0	0.0	0.0	0.0	0.0	0.0	0.0	0.0	0.0	0.0	0.0	0.0	0.0	0.0	0.0	0.0
K(676)	0.0		0.0	0.0	0.0	0.0	0.0	0.0	0.0	0.0	0.0	0.0	0.0	0.0	0.0	0.0	0.0	0.0	0.0	0.0	0.0	0.0
N(209)	0.0		0.0	0.0	0.0	0.0	0.0	0.0	0.0	0.0	0.0	0.0	0.0	0.0	0.0	0.0	0.0	0.0	0.0	0.0	0.0	0.0
K(551)	0.0		0.0	0.0	0.0	0.0	0.0	0.0	0.0	0.0	0.0	0.0	0.0	0.0	0.0	0.0	0.0	0.0	0.0	0.0	0.0	0.0
T(540)	0.0		0.0	0.0	0.0	0.0	0.0	0.0	0.0	0.0	0.0	0.0	0.0	0.0	0.0	0.0	0.0	0.0	0.0	0.0	0.0	0.0
D(36)	0.0		0.0	0.0	0.0	0.0	0.0	0.0	0.0	0.0	0.0	0.0	0.0	0.0	0.0	0.0	0.0	0.0	0.0	0.0	0.0	0.0
Y(237)	0.0		0.0	0.0	0.0	0.0	0.0	0.0	0.0	0.0	0.0	0.0	0.0	0.0	0.0	0.0	0.0	0.0	0.0	0.0	0.0	0.0
I(589)	0.0		0.0	0.0	0.0	0.0	0.0	0.0	0.0	0.0	0.0	0.0	0.0	0.0	0.0	0.0	0.0	0.0	0.0	0.0	0.0	0.0
T(853)	0.0		0.0	0.0	0.0	0.0	0.0	0.0	0.0	0.0	0.0	0.0	0.0	0.0	0.0	0.0	0.0	0.0	0.0	0.0	0.0	0.0
C(669)	0.0		0.0	0.0	0.0	0.0	0.0	0.0	0.0	0.0	0.0	0.0	0.0	0.0	0.0	0.0	0.0	0.0	0.0	0.0	0.0	0.0
Y(787)	0.0		0.0	0.0	0.0	0.0	0.0	0.0	0.0	0.0	0.0	0.0	0.0	0.0	0.0	0.0	0.0	0.0	0.0	0.0	0.0	0.0
K(849)	0.0		0.0	0.0	0.0	0.0	0.0	0.0	0.0	0.0	0.0	0.0	0.0	0.0	0.0	0.0	0.0	0.0	0.0	0.0	0.0	0.0
R(858)	0.0		0.0	0.0	0.0	0.0	0.0	0.0	0.0	0.0	0.0	0.0	0.0	0.0	0.0	0.0	0.0	0.0	0.0	0.0	0.0	0.0
L(576)	0.0		0.0	0.0	0.0	0.0	0.0	0.0	0.0	0.0	0.0	0.0	0.0	0.0	0.0	0.0	0.0	0.0	0.0	0.0	0.0	0.0
F(859)	0.0		0.0	0.0	0.0	0.0	0.0	0.0	0.0	0.0	0.0	0.0	0.0	0.0	0.0	0.0	0.0	0.0	0.0	0.0	0.0	0.0
V(860)	0.0		0.0	0.0	0.0	0.0	0.0	0.0	0.0	0.0	0.0	0.0	0.0	0.0	0.0	0.0	0.0	0.0	0.0	0.0	0.0	0.0
S(861)	0.0		0.0	0.0	0.0	0.0	0.0	0.0	0.0	0.0	0.0	0.0	0.0	0.0	0.0	0.0	0.0	0.0	0.0	0.0	0.0	0.0
F(571)	0.0		0.0	0.0	0.0	0.0	0.0	0.0	0.0	0.0	0.0	0.0	0.0	0.0	0.0	0.0	0.0	0.0	0.0	0.0	0.0	0.0
R(569)	0.0		0.0	0.0	0.0	0.0	0.0	0.0	0.0	0.0	0.0	0.0	0.0	0.0	0.0	0.0	0.0	0.0	0.0	0.0	0.0	0.0
L(862)	0.0		0.0	0.0	0.0	0.0	0.0	0.0	0.0	0.0	0.0	0.0	0.0	0.0	0.0	0.0	0.0	0.0	0.0	0.0	0.0	0.0
D(221)	0.0		0.0	0.0	0.0	0.0	0.0	0.0	0.0	0.0	0.0	0.0	0.0	0.0	0.0	0.0	0.0	0.0	0.0	0.0	0.0	0.0
G(839)	0.0		0.0	0.0	0.0	0.0	0.0	0.0	0.0	0.0	0.0	0.0	0.0	0.0	0.0	0.0	0.0	0.0	0.0	0.0	0.0	0.0
G(23)	0.0		0.0	0.0	0.0	0.0	0.0	0.0	0.0	0.0	0.0	0.0	0.0	0.0	0.0	0.0	0.0	0.0	0.0	0.0	0.0	0.0
S(561)	0.0		0.0	0.0	0.0	0.0	0.0	0.0	0.0	0.0	0.0	0.0	0.0	0.0	0.0	0.0	0.0	0.0	0.0	0.0	0.0	0.0
V(560)	0.0		0.0	0.0	0.0	0.0	0.0	0.0	0.0	0.0	0.0	0.0	0.0	0.0	0.0	0.0	0.0	0.0	0.0	0.0	0.0	0.0
Y(286)	0.0		0.0	0.0	0.0	0.0	0.0	0.0	0.0	0.0	0.0	0.0	0.0	0.0	0.0	0.0	0.0	0.0	0.0	0.0	0.0	0.0
F(287)	0.0		0.0	0.0	0.0	0.0	0.0	0.0	0.0	0.0	0.0	0.0	0.0	0.0	0.0	0.0	0.0	0.0	0.0	0.0	0.0	0.0
T(556)	0.0		0.0	0.0	0.0	0.0	0.0	0.0	0.0	0.0	0.0	0.0	0.0	0.0	0.0	0.0	0.0	0.0	0.0	0.0	0.0	0.0
Y(788)	0.0		0.0	0.0	0.0	0.0	0.0	0.0	0.0	0.0	0.0	0.0	0.0	0.0	0.0	0.0	0.0	0.0	0.0	0.0	0.0	0.0
V(662)	0.0		0.0	0.0	0.0	0.0	0.0	0.0	0.0	0.0	0.0	0.0	0.0	0.0	0.0	0.0	0.0	0.0	0.0	0.0	0.0	0.0
D(291)	0.0		0.0	0.0	0.0	0.0	0.0	0.0	0.0	0.0	0.0	0.0	0.0	0.0	0.0	0.0	0.0	0.0	0.0	0.0	0.0	0.0
D(865)	0.0		0.0	0.0	0.0	0.0	0.0	0.0	0.0	0.0	0.0	0.0	0.0	0.0	0.0	0.0	0.0	0.0	0.0	0.0	0.0	0.0
Y(294)	0.0		0.0	0.0	0.0	0.0	0.0	0.0	0.0	0.0	0.0	0.0	0.0	0.0	0.0	0.0	0.0	0.0	0.0	0.0	0.0	0.0
N(543)	0.0		0.0	0.0	0.0	0.0	0.0	0.0	0.0	0.0	0.0	0.0	0.0	0.0	0.0	0.0	0.0	0.0	0.0	0.0	0.0	0.0
Q(541)	0.0		0.0	0.0	0.0	0.0	0.0	0.0	0.0	0.0	0.0	0.0	0.0	0.0	0.0	0.0	0.0	0.0	0.0	0.0	0.0	0.0
K(511)	0.0		0.0	0.0	0.0	0.0	0.0	0.0	0.0	0.0	0.0	0.0	0.0	0.0	0.0	0.0	0.0	0.0	0.0	0.0	0.0	0.0
N(314)	0.0		0.0	0.0	0.0	0.0	0.0	0.0	0.0	0.0	0.0	0.0	0.0	0.0	0.0	0.0	0.0	0.0	0.0	0.0	0.0	0.0
A(866)	0.0		0.0	0.0	0.0	0.0	0.0	0.0	0.0	0.0	0.0	0.0	0.0	0.0	0.0	0.0	0.0	0.0	0.0	0.0	0.0	0.0
G(510)	0.0		0.0	0.0	0.0	0.0	0.0	0.0	0.0	0.0	0.0	0.0	0.0	0.0	0.0	0.0	0.0	0.0	0.0	0.0	0.0	0.0
F(104)	0.0		0.0	0.0	0.0	0.0	0.0	0.0	0.0	0.0	0.0	0.0	0.0	0.0	0.0	0.0	0.0	0.0	0.0	0.0	0.0	0.0
N(447)	0.0		0.0	0.0	0.0	0.0	0.0	0.0	0.0	0.0	0.0	0.0	0.0	0.0	0.0	0.0	0.0	0.0	0.0	0.0	0.0	0.0
N(691)	0.0		0.0	0.0	0.0	0.0	0.0	0.0	0.0	0.0	0.0	0.0	0.0	0.0	0.0	0.0	0.0	0.0	0.0	0.0	0.0	0.0
L(895)	0.0		0.0	0.0	0.0	0.0	0.0	0.0	0.0	0.0	0.0	0.0	0.0	0.0	0.0	0.0	0.0	0.0	0.0	0.0	0.0	0.0
R(624)	0.0		0.0	0.0	0.0	0.0	0.0	0.0	0.0	0.0	0.0	0.0	0.0	0.0	0.0	0.0	0.0	0.0	0.0	0.0	0.0	0.0
V(764)	0.0		0.0	0.0	0.0	0.0	0.0	0.0	0.0	0.0	0.0	0.0	0.0	0.0	0.0	0.0	0.0	0.0	0.0	0.0	0.0	0.0
F(441)	0.0		0.0	0.0	0.0	0.0	0.0	0.0	0.0	0.0	0.0	0.0	0.0	0.0	0.0	0.0	0.0	0.0	0.0	0.0	0.0	0.0
F(440)	0.0		0.0	0.0	0.0	0.0	0.0	0.0	0.0	0.0	0.0	0.0	0.0	0.0	0.0	0.0	0.0	0.0	0.0	0.0	0.0	0.0
A(376)	0.0		0.0	0.0	0.0	0.0	0.0	0.0	0.0	0.0	0.0	0.0	0.0	0.0	0.0	0.0	0.0	0.0	0.0	0.0	0.0	0.0
R(116)	0.0		0.0	0.0	0.0	0.0	0.0	0.0	0.0	0.0	0.0	0.0	0.0	0.0	0.0	0.0	0.0	0.0	0.0	0.0	0.0	0.0
F(694)	0.0		0.0	0.0	0.0	0.0	0.0	0.0	0.0	0.0	0.0	0.0	0.0	0.0	0.0	0.0	0.0	0.0	0.0	0.0	0.0	0.0
D(377)	0.0		0.0	0.0	0.0	0.0	0.0	0.0	0.0	0.0	0.0	0.0	0.0	0.0	0.0	0.0	0.0	0.0	0.0	0.0	0.0	0.0
F(428)	0.0		0.0	0.0	0.0	0.0	0.0	0.0	0.0	0.0	0.0	0.0	0.0	0.0	0.0	0.0	0.0	0.0	0.0	0.0	0.0	0.0
F(812)	0.0		0.0	0.0	0.0	0.0	0.0	0.0	0.0	0.0	0.0	0.0	0.0	0.0	0.0	0.0	0.0	0.0	0.0	0.0	0.0	0.0
F(422)	0.0		0.0	0.0	0.0	0.0	0.0	0.0	0.0	0.0	0.0	0.0	0.0	0.0	0.0	0.0	0.0	0.0	0.0	0.0	0.0	0.0
C(152)	0.0		0.0	0.0	0.0	0.0	0.0	0.0	0.0	0.0	0.0	0.0	0.0	0.0	0.0	0.0	0.0	0.0	0.0	0.0	0.0	0.0
F(419)	0.0		0.0	0.0	0.0	0.0	0.0	0.0	0.0	0.0	0.0	0.0	0.0	0.0	0.0	0.0	0.0	0.0	0.0	0.0	0.0	0.0
Y(884)	0.0		0.0	0.0	0.0	0.0	0.0	0.0	0.0	0.0	0.0	0.0	0.0	0.0	0.0	0.0	0.0	0.0	0.0	0.0	0.0	0.0
N(416)	0.0		0.0	0.0	0.0	0.0	0.0	0.0	0.0	0.0	0.0	0.0	0.0	0.0	0.0	0.0	0.0	0.0	0.0	0.0	0.0	0.0
Q(698)	0.0		0.0	0.0	0.0	0.0	0.0	0.0	0.0	0.0	0.0	0.0	0.0	0.0	0.0	0.0	0.0	0.0	0.0	0.0	0.0	0.0
Q(408)	0.0		0.0	0.0	0.0	0.0	0.0	0.0	0.0	0.0	0.0	0.0	0.0	0.0	0.0	0.0	0.0	0.0	0.0	0.0	0.0	0.0
N(767)	0.0		0.0	0.0	0.0	0.0	0.0	0.0	0.0	0.0	0.0	0.0	0.0	0.0	0.0	0.0	0.0	0.0	0.0	0.0	0.0	0.0
L(131)	0.0		0.0	0.0	0.0	0.0	0.0	0.0	0.0	0.0	0.0	0.0	0.0	0.0	0.0	0.0	0.0	0.0	0.0	0.0	0.0	0.0
S(814)	0.0		0.0	0.0	0.0	0.0	0.0	0.0	0.0	0.0	0.0	0.0	0.0	0.0	0.0	0.0	0.0	0.0	0.0	0.0	0.0	0.0
F(134)	0.0		0.0	0.0	0.0	0.0	0.0	0.0	0.0	0.0	0.0	0.0	0.0	0.0	0.0	0.0	0.0	0.0	0.0	0.0	0.0	0.0
N(403)	0.0		0.0	0.0	0.0	0.0	0.0	0.0	0.0	0.0	0.0	0.0	0.0	0.0	0.0	0.0	0.0	0.0	0.0	0.0	0.0	0.0
N(703)	0.0		0.0	0.0	0.0	0.0	0.0	0.0	0.0	0.0	0.0	0.0	0.0	0.0	0.0	0.0	0.0	0.0	0.0	0.0	0.0	0.0
G(345)	0.0		0.0	0.0	0.0	0.0	0.0	0.0	0.0	0.0	0.0	0.0	0.0	0.0	0.0	0.0	0.0	0.0	0.0	0.0	0.0	0.0
F(102)	0.0		0.0	0.0	0.0	0.0	0.0	0.0	0.0	0.0	0.0	0.0	0.0	0.0	0.0	0.0	0.0	0.0	0.0	0.0	0.0	0.0
Y(455)	0.0		0.0	0.0	0.0	0.0	0.0	0.0	0.0	0.0	0.0	0.0	0.0	0.0	0.0	0.0	0.0	0.0	0.0	0.0	0.0	0.0
S(682)	0.0		0.0	0.0	0.0	0.0	0.0	0.0	0.0	0.0	0.0	0.0	0.0	0.0	0.0	0.0	0.0	0.0	0.0	0.0	0.0	0.0
C(310)	0.0		0.0	0.0	0.0	0.0	0.0	0.0	0.0	0.0	0.0	0.0	0.0	0.0	0.0	0.0	0.0	0.0	0.0	0.0	0.0	0.0
N(507)	0.0		0.0	0.0	0.0	0.0	0.0	0.0	0.0	0.0	0.0	0.0	0.0	0.0	0.0	0.0	0.0	0.0	0.0	0.0	0.0	0.0
Y(867)	0.0		0.0	0.0	0.0	0.0	0.0	0.0	0.0	0.0	0.0	0.0	0.0	0.0	0.0	0.0	0.0	0.0	0.0	0.0	0.0	0.0
E(658)	0.0		0.0	0.0	0.0	0.0	0.0	0.0	0.0	0.0	0.0	0.0	0.0	0.0	0.0	0.0	0.0	0.0	0.0	0.0	0.0	0.0
N(657)	0.0		0.0	0.0	0.0	0.0	0.0	0.0	0.0	0.0	0.0	0.0	0.0	0.0	0.0	0.0	0.0	0.0	0.0	0.0	0.0	0.0
K(500)	0.0		0.0	0.0	0.0	0.0	0.0	0.0	0.0	0.0	0.0	0.0	0.0	0.0	0.0	0.0	0.0	0.0	0.0	0.0	0.0	0.0
P(612)	0.0		0.0	0.0	0.0	0.0	0.0	0.0	0.0	0.0	0.0	0.0	0.0	0.0	0.0	0.0	0.0	0.0	0.0	0.0	0.0	0.0
G(679)	0.0		0.0	0.0	0.0	0.0	0.0	0.0	0.0	0.0	0.0	0.0	0.0	0.0	0.0	0.0	0.0	0.0	0.0	0.0	0.0	0.0
G(616)	0.0		0.0	0.0	0.0	0.0	0.0	0.0	0.0	0.0	0.0	0.0	0.0	0.0	0.0	0.0	0.0	0.0	0.0	0.0	0.0	0.0
S(681)	0.0		0.0	0.0	0.0	0.0	0.0	0.0	0.0	0.0	0.0	0.0	0.0	0.0	0.0	0.0	0.0	0.0	0.0	0.0	0.0	0.0
F(753)	0.0		0.0	0.0	0.0	0.0	0.0	0.0	0.0	0.0	0.0	0.0	0.0	0.0	0.0	0.0	0.0	0.0	0.0	0.0	0.0	0.0
A(490)	0.0		0.0	0.0	0.0	0.0	0.0	0.0	0.0	0.0	0.0	0.0	0.0	0.0	0.0	0.0	0.0	0.0	0.0	0.0	0.0	0.0
C(487)	0.0		0.0	0.0	0.0	0.0	0.0	0.0	0.0	0.0	0.0	0.0	0.0	0.0	0.0	0.0	0.0	0.0	0.0	0.0	0.0	0.0
Y(456)	0.0		0.0	0.0	0.0	0.0	0.0	0.0	0.0	0.0	0.0	0.0	0.0	0.0	0.0	0.0	0.0	0.0	0.0	0.0	0.0	0.0
L(655)	0.0		0.0	0.0	0.0	0.0	0.0	0.0	0.0	0.0	0.0	0.0	0.0	0.0	0.0	0.0	0.0	0.0	0.0	0.0	0.0	0.0
D(684)	0.0		0.0	0.0	0.0	0.0	0.0	0.0	0.0	0.0	0.0	0.0	0.0	0.0	0.0	0.0	0.0	0.0	0.0	0.0	0.0	0.0
Q(468)	0.0		0.0	0.0	0.0	0.0	0.0	0.0	0.0	0.0	0.0	0.0	0.0	0.0	0.0	0.0	0.0	0.0	0.0	0.0	0.0	0.0
L(931)	0.0		0.0	0.0	0.0	0.0	0.0	0.0	0.0	0.0	0.0	0.0	0.0	0.0	0.0	0.0	0.0	0.0	0.0	0.0	0.0	0.0
S(343)	0.0		0.0	0.0	0.0	0.0	0.0	0.0	0.0	0.0	0.0	0.0	0.0	0.0	0.0	0.0	0.0	0.0	0.0	0.0	0.0	0.0
T(462)	0.0		0.0	0.0	0.0	0.0	0.0	0.0	0.0	0.0	0.0	0.0	0.0	0.0	0.0	0.0	0.0	0.0	0.0	0.0	0.0	0.0
S(904)	0.0		0.0	0.0	0.0	0.0	0.0	0.0	0.0	0.0	0.0	0.0	0.0	0.0	0.0	0.0	0.0	0.0	0.0	0.0	0.0	0.0
K(621)	0.0		0.0	0.0	0.0	0.0	0.0	0.0	0.0	0.0	0.0	0.0	0.0	0.0	0.0	0.0	0.0	0.0	0.0	0.0	0.0	0.0
N(459)	0.0		0.0	0.0	0.0	0.0	0.0	0.0	0.0	0.0	0.0	0.0	0.0	0.0	0.0	0.0	0.0	0.0	0.0	0.0	0.0	0.0
Y(689)	0.0		0.0	0.0	0.0	0.0	0.0	0.0	0.0	0.0	0.0	0.0	0.0	0.0	0.0	0.0	0.0	0.0	0.0	0.0	0.0	0.0
L(900)	0.0		0.0	0.0	0.0	0.0	0.0	0.0	0.0	0.0	0.0	0.0	0.0	0.0	0.0	0.0	0.0	0.0	0.0	0.0	0.0	0.0
C(622)	0.0		0.0	0.0	0.0	0.0	0.0	0.0	0.0	0.0	0.0	0.0	0.0	0.0	0.0	0.0	0.0	0.0	0.0	0.0	0.0	0.0
E(811)	0.0		0.0	0.0	0.0	0.0	0.0	0.0	0.0	0.0	0.0	0.0	0.0	0.0	0.0	0.0	0.0	0.0	0.0	0.0	0.0	0.0

## Sheet: Sheet2
Sequence Count
553149
