# Supplementary material for: SARS-CoV-2 NSP-12 mutations survey during the pandemic in the world
Source: Research Square preprint supplement (doi:10.21203/rs.3.rs-877078/v1), 2021-09-22
Supplement: Supplementary file 2 [file 12e946942a0d84bd86a19de0.xlsx]

## Sheet: nsp12
	2020-01-31	2020-02-29	2020-03-31	2020-04-30	2020-05-31	2020-06-30	2020-07-31	2020-08-31	2020-09-30	2020-10-31	2020-11-30	2020-12-31	2021-01-31	2021-02-28	2021-03-31	2021-04-30	2021-05-31	2021-06-30
P(323)	0.851852	0.714286	0.882932	0.992548	0.998962	0.992918	0.995312	1	1	0.99637	0.996899	0.998043	0.990945	0.994019	0.988576	0.995795	0.993274	1
P(227)	0.037037	0	0.003282	0.000745	0.002077	0.009915	0.015625	0.038511	0.015284	0.032668	0.010853	0.010763	0.006225	0.013158	0.031084	0.031535	0.013932	0
K(91)	0	0	0	0.000745	0.001038	0.001416	0	0.002567	0.004367	0.012704	0.004651	0.008806	0.006791	0.001794	0.006376	0.012263	0.005765	0
I(548)	0	0	0	0	0	0	0	0	0	0	0	0	0.001698	0.002392	0.008767	0.008584	0.01105	0
A(185)	0	0	0	0.000745	0	0.001416	0	0.002567	0.004367	0.005445	0.003101	0.004892	0.044709	0.006579	0.000531	0.001577	0	0
Y(831)	0	0	0	0	0	0	0	0	0	0	0	0	0	0.002392	0.008502	0.008059	0.007447	0
V(776)	0	0	0	0	0	0	0	0	0	0	0	0.004892	0.044709	0.007177	0.000531	0	0	0
A(526)	0	0	0	0	0	0	0	0	0	0	0	0.002935	0.03622	0.006579	0.00186	0.001226	0	0
T(225)	0	0	0	0	0	0	0	0.002567	0	0	0	0.000978	0.000566	0.030502	0.007173	0.001577	0	0
H(613)	0	0	0.016411	0.007452	0.006231	0.008499	0.003125	0.011553	0.010917	0	0.004651	0.011742	0.000566	0	0.000531	0.001752	0.00048	0
P(918)	0	0	0	0	0.004154	0.050992	0.032812	0.019255	0	0	0	0	0.000566	0.000598	0	0	0.00024	0
S(647)	0	0	0	0	0	0.001416	0.014062	0.001284	0.002183	0.00726	0.004651	0.006849	0.009621	0.001196	0.000797	0.000876	0.000961	0
N(743)	0	0	0	0	0	0	0	0	0	0	0	0	0	0	0.006376	0.004205	0.001681	0
N(734)	0	0	0	0	0	0	0	0	0	0	0	0	0	0	0.001328	0.004905	0.005044	0
Y(719)	0	0	0	0	0	0	0	0	0	0	0	0	0	0.000598	0.008236	0.001752	0.001681	0
T(806)	0	0	0	0.000745	0.001038	0.012748	0.003125	0.001284	0.002183	0.009074	0.017054	0.000978	0.001132	0.001196	0.000797	0.000876	0	0
Q(822)	0	0	0	0	0	0.001416	0.009375	0.001284	0	0.016334	0.004651	0.001957	0.002264	0.001196	0.001328	0.000876	0.001201	0
S(6)	0	0	0	0.000745	0	0	0.001562	0.002567	0.002183	0	0	0.002935	0.002264	0.004785	0.002391	0.001051	0.000721	0
A(529)	0	0	0	0	0	0.001416	0	0.005135	0	0	0	0	0.001132	0	0.001594	0.002102	0.002883	0
M(629)	0	0	0	0	0	0	0	0.001284	0	0	0	0	0	0.000598	0.002391	0.002628	0.001922	0
S(913)	0	0	0	0.000745	0.002077	0	0.001562	0	0.002183	0.009074	0.006202	0.001957	0	0	0.00186	0.000876	0.001441	0
K(478)	0	0	0	0.000745	0	0	0	0.003851	0	0.001815	0	0.004892	0.000566	0.002392	0.000266	0.001752	0.001922	0
A(383)	0	0	0	0.004471	0	0	0	0	0	0.00363	0.00155	0.011742	0.003962	0.002392	0	0.000175	0	0
Y(521)	0	0	0	0	0	0	0	0	0	0	0	0	0	0	0.000266	0.004205	0.001681	0
T(26)	0	0	0	0	0	0.004249	0.003125	0.002567	0	0.001815	0.00155	0.000978	0.000566	0.001794	0.001063	0.001752	0.000961	0
Y(122)	0	0	0	0	0.005192	0.004249	0.009375	0.003851	0.008734	0.009074	0.00155	0.000978	0.001132	0	0	0	0	0
M(666)	0	0	0	0.000745	0.001038	0.002833	0.00625	0.006418	0.002183	0	0	0.002935	0.00283	0.003589	0	0	0	0
D(477)	0	0	0	0	0	0	0	0.001284	0	0.00726	0.010853	0.008806	0.003396	0.000598	0	0	0	0
I(696)	0	0	0	0	0	0	0	0	0	0	0	0	0.003396	0.00299	0.001594	0.001402	0.00048	0
T(591)	0	0	0	0	0	0	0	0.001284	0	0.012704	0	0	0	0	0.001328	0.001577	0.001201	0
T(276)	0	0	0	0.00149	0	0	0.004688	0	0.004367	0.00363	0.00155	0.003914	0	0.000598	0.002391	0.000175	0	0
L(638)	0	0	0	0.000745	0	0	0	0.002567	0.002183	0	0.00155	0	0.001132	0.000598	0.00186	0.000876	0.001201	0
M(463)	0	0	0.002188	0	0	0	0.001562	0	0	0	0.00155	0.000978	0.000566	0.001794	0.000266	0.001577	0.001441	0
A(195)	0	0	0	0	0	0	0	0.002567	0	0	0.00155	0.000978	0.002264	0.00299	0.002922	0.000175	0	0
V(700)	0	0	0	0	0	0	0	0	0	0	0.00155	0	0	0	0	0.001402	0.003603	0
G(671)	0	0	0.002188	0	0	0	0	0.001284	0	0	0	0.000978	0.001132	0.001196	0	0.000526	0.002883	0
I(201)	0	0	0	0	0	0.001416	0.001562	0.003851	0.017467	0.001815	0.009302	0.000978	0	0	0	0.000175	0.00024	0
L(271)	0	0	0	0	0	0	0	0	0	0	0	0	0	0	0	0.001402	0.003603	0
T(319)	0	0	0	0.00149	0.005192	0	0	0.001284	0.002183	0	0	0	0.001132	0	0.000266	0.001051	0.000961	0
A(97)	0	0	0.002188	0	0	0.001416	0	0.001284	0.002183	0	0.004651	0.001957	0.001132	0.000598	0.001063	0.000526	0.00024	0
K(780)	0	0	0	0	0	0	0	0	0.002183	0.00363	0.007752	0.007828	0.000566	0	0	0.000175	0.000721	0
M(124)	0	0	0	0	0	0.001416	0	0	0.00655	0	0.00155	0.000978	0	0	0	0.000701	0.002402	0
T(293)	0	0	0	0	0	0	0	0	0.004367	0	0.003101	0.002935	0	0.001196	0	0.001577	0.00048	0
T(739)	0	0	0.001094	0.000745	0	0	0	0	0.004367	0	0	0.000978	0.000566	0	0.000266	0.001051	0.001681	0
G(345)	0	0	0	0	0	0	0	0.007702	0	0	0	0	0.003396	0.002392	0.000797	0.000175	0	0
A(176)	0	0	0	0	0	0	0	0	0	0	0.004651	0.000978	0.001132	0.00299	0.001594	0.000175	0.00024	0
T(248)	0	0	0	0	0	0	0	0.002567	0	0.00363	0	0	0.001698	0.000598	0.000266	0.001051	0.000961	0
T(51)	0	0	0	0	0.001038	0	0	0	0	0	0	0	0.000566	0.000598	0.000531	0.001927	0.000721	0
V(473)	0	0	0	0	0	0	0.001562	0	0	0	0	0	0.000566	0.000598	0	0.00035	0.003123	0
V(354)	0	0	0.001094	0.002981	0.002077	0	0.001562	0.006418	0	0.001815	0	0.000978	0	0	0	0.00035	0.00024	0
E(744)	0	0	0	0	0	0	0	0	0	0	0	0.001957	0.001698	0.001196	0	0.000876	0.001441	0
R(249)	0	0	0	0.00149	0	0	0.001562	0.002567	0	0.009074	0	0	0.000566	0.000598	0	0.00035	0.000961	0
Y(38)	0	0	0	0.000745	0	0	0.001562	0.006418	0.002183	0.001815	0	0.002935	0.00283	0	0	0	0	0
T(394)	0	0	0	0.005216	0.001038	0.002833	0.003125	0	0.002183	0	0	0	0.000566	0	0.000266	0.00035	0	0
D(62)	0	0	0	0	0	0	0	0	0	0	0	0	0	0	0.001594	0.001051	0.001201	0
D(40)	0	0	0	0	0	0	0	0	0	0	0	0	0	0.005981	0.001594	0.000175	0	0
D(153)	0	0	0	0	0	0.001416	0	0	0	0	0.00155	0.000978	0.001698	0.002392	0.001328	0.000175	0	0
D(893)	0	0	0	0	0	0	0	0	0.002183	0.00726	0.003101	0.003914	0	0	0.000266	0.00035	0.00048	0
P(94)	0	0	0.001094	0	0.002077	0	0	0.001284	0	0.00363	0	0	0.001698	0	0.000266	0.000701	0.00048	0
T(344)	0	0	0	0	0	0	0	0.01027	0	0	0.00155	0	0.001132	0.001196	0.000266	0.000175	0	0
D(161)	0	0	0	0	0	0	0	0	0	0	0.00155	0.000978	0.001132	0.001794	0.001063	0.000526	0.00024	0
V(257)	0	0	0	0	0	0.001416	0.004688	0.001284	0	0	0	0	0.000566	0.001196	0.000797	0.00035	0.00048	0
M(196)	0	0	0.002188	0.002235	0.001038	0.002833	0.001562	0	0	0	0	0.000978	0.000566	0	0	0.000701	0	0
T(803)	0	0	0	0.00149	0	0.001416	0	0	0.002183	0.005445	0.00155	0	0	0	0.000266	0.000876	0	0
A(449)	0	0	0.002188	0.000745	0.001038	0.001416	0.001562	0.001284	0.002183	0	0	0	0	0.001196	0	0.000175	0.000721	0
T(85)	0	0	0	0	0	0	0	0.001284	0.008734	0	0	0	0	0.000598	0	0.000876	0.000721	0
A(16)	0	0	0	0	0	0	0	0	0	0	0.004651	0	0.000566	0.001196	0	0.000876	0.000721	0
T(908)	0	0	0.001094	0.002235	0	0	0	0.001284	0.002183	0.001815	0	0	0	0	0.000266	0	0.001201	0
L(302)	0	0	0	0	0	0	0	0	0	0	0	0.001957	0.00283	0.003589	0	0	0	0
D(738)	0	0	0	0	0	0	0.001562	0	0	0	0.00155	0	0.001132	0.001196	0.000531	0.000175	0.000961	0
M(110)	0	0	0	0.000745	0	0	0	0.001284	0	0.00363	0.006202	0	0	0.000598	0	0.000175	0.00048	0
T(870)	0	0	0	0	0	0	0	0	0	0	0	0.000978	0.000566	0	0.002125	0.000175	0.00024	0
D(194)	0	0	0	0	0	0	0	0.007702	0	0	0.00155	0.001957	0	0	0	0.000526	0	0
A(923)	0.037037	0	0	0	0.002077	0.001416	0	0.002567	0	0	0	0.000978	0.000566	0.000598	0	0.00035	0.00024	0
R(285)	0	0	0	0	0	0	0	0	0.002183	0.001815	0	0	0	0.001196	0.000531	0.000175	0.000961	0
D(60)	0	0	0	0	0	0	0	0	0	0.001815	0	0.001957	0.000566	0	0	0.000175	0.001441	0
A(95)	0	0	0.001094	0	0.001038	0	0	0	0	0	0	0	0	0	0	0.000701	0.001201	0
A(2)	0	0	0	0	0	0	0	0	0	0.005445	0	0	0	0.000598	0	0.000526	0.000961	0
A(382)	0	0	0	0.002235	0	0.002833	0.003125	0	0	0	0	0	0.000566	0	0.000797	0	0	0
M(906)	0	0	0	0	0	0	0	0.001284	0.002183	0.00363	0	0	0	0	0.000531	0.000701	0.00024	0
M(601)	0	0	0	0	0	0	0	0	0	0	0.00155	0.000978	0.001132	0	0.000531	0.000526	0.00024	0
A(706)	0	0	0	0	0	0	0	0.008986	0	0	0	0	0.000566	0	0.000266	0	0.00024	0
D(155)	0	0	0	0	0	0	0	0.001284	0	0	0	0	0	0	0	0.000175	0.001922	0
Y(80)	0	0	0	0	0	0	0	0	0	0	0	0	0	0	0.001063	0.000701	0.00048	0
D(910)	0	0	0	0	0	0	0	0	0	0	0	0	0	0	0.002125	0.000175	0	0
A(656)	0	0	0	0	0.002077	0	0	0.001284	0	0	0.00155	0.000978	0	0	0	0.000526	0.00024	0
G(108)	0	0	0	0	0.001038	0	0	0	0	0.001815	0	0.001957	0.001698	0.000598	0.000266	0	0	0
D(63)	0	0	0.004376	0.000745	0.001038	0	0	0	0	0	0	0	0	0	0	0.000175	0.00048	0
H(928)	0	0	0.001094	0.000745	0	0.002833	0	0.003851	0	0	0	0	0	0	0	0.00035	0	0
D(140)	0	0	0	0	0	0	0.001562	0	0	0.001815	0.003101	0	0	0.001794	0	0	0.00048	0
T(141)	0	0	0	0	0	0.001416	0	0	0	0.00363	0.00155	0	0.000566	0	0	0.000526	0.00024	0
L(707)	0	0	0	0	0	0	0	0.005135	0.008734	0	0.00155	0	0	0	0	0	0	0
G(823)	0	0	0	0	0	0	0.003125	0.002567	0	0	0	0	0.001132	0.000598	0	0	0.00024	0
Q(875)	0	0	0	0	0	0	0	0	0	0	0	0.001957	0	0	0.000531	0.000175	0.000721	0
D(284)	0	0	0	0	0	0	0	0	0	0.001815	0	0.000978	0.002264	0	0.000266	0	0.00024	0
V(182)	0	0	0	0	0	0	0.001562	0	0	0	0	0.000978	0	0	0.000266	0.000876	0	0
D(92)	0	0	0	0	0	0	0	0	0	0.001815	0	0	0	0	0.000266	0.000526	0.000721	0
G(179)	0	0	0	0	0	0	0	0	0	0.001815	0	0	0	0	0.000797	0.000701	0	0
L(829)	0	0	0	0	0.001038	0	0	0.001284	0	0	0	0	0.000566	0.000598	0.000266	0.00035	0.00024	0
V(848)	0	0	0	0	0	0	0	0	0	0.001815	0	0.000978	0	0.000598	0.000266	0.000526	0.00024	0
P(232)	0	0	0	0	0	0	0	0	0.002183	0	0	0	0	0	0	0.000526	0.000961	0
L(388)	0	0	0	0	0	0.001416	0.00625	0.001284	0	0	0	0	0	0	0	0.00035	0	0
T(262)	0	0	0	0	0	0	0	0.005135	0	0	0.00155	0	0	0	0	0.00035	0.00024	0
P(169)	0	0	0	0	0	0	0.001562	0	0	0	0.010853	0	0	0	0	0	0	0
D(154)	0	0	0	0	0	0	0	0	0	0	0	0	0	0	0.000797	0.00035	0.000721	0
V(588)	0	0	0.003282	0.000745	0	0	0	0	0	0	0	0	0.000566	0	0	0.000526	0	0
H(82)	0	0	0	0	0	0.001416	0.003125	0	0	0	0.00155	0.000978	0	0	0.000266	0	0.00024	0
N(88)	0	0	0	0	0	0	0	0	0.002183	0	0	0.001957	0.001132	0	0.000531	0	0	0
G(385)	0	0	0	0	0	0	0	0	0	0.001815	0	0	0	0.000598	0.000797	0.00035	0	0
V(234)	0	0	0	0	0	0	0	0	0	0	0	0	0	0.000598	0	0.00035	0.000961	0
P(21)	0	0	0	0	0	0	0.003125	0.001284	0	0.001815	0	0	0	0	0	0.000175	0.00048	0
T(20)	0	0	0	0.000745	0	0	0	0	0	0	0	0	0.000566	0	0.000266	0.00035	0.00048	0
S(229)	0	0	0	0	0	0	0.001562	0	0	0	0	0	0	0.000598	0.001063	0	0.00024	0
L(636)	0	0	0.002188	0	0	0	0	0	0	0	0	0	0	0.000598	0.000266	0.000526	0	0
T(604)	0	0	0	0	0	0	0	0	0.004367	0	0	0	0.001132	0	0.000266	0.00035	0	0
A(250)	0	0	0	0	0	0	0	0	0.004367	0.001815	0	0	0	0	0	0.000175	0.000721	0
D(879)	0	0	0	0	0.001038	0	0	0	0.002183	0.001815	0	0	0.000566	0	0.000531	0.000175	0	0
S(68)	0	0	0	0.000745	0	0.001416	0	0.001284	0	0	0	0	0	0.001196	0	0.000175	0.00024	0
T(226)	0	0	0	0	0	0	0	0	0	0	0	0	0.000566	0	0	0.000701	0.00024	0
A(716)	0	0	0	0	0	0	0	0	0	0	0.006202	0.000978	0.000566	0	0	0	0	0
A(4)	0	0	0	0.000745	0	0	0	0	0	0	0.00155	0.000978	0.000566	0	0	0	0.00048	0
D(258)	0	0	0	0	0	0	0	0	0	0	0.003101	0.000978	0.000566	0.000598	0	0.000175	0	0
I(171)	0	0	0.001094	0	0	0	0	0	0	0	0	0	0	0.001196	0.000531	0.000175	0	0
T(643)	0	0	0	0	0	0	0	0.001284	0	0	0	0	0	0.000598	0.000797	0.000175	0	0
Q(184)	0	0	0	0	0	0	0	0	0	0	0	0.000978	0	0	0	0.000701	0.00024	0
Y(346)	0	0	0	0	0	0	0.004688	0	0	0	0	0	0	0	0	0.00035	0.00024	0
S(607)	0	0	0	0.000745	0	0	0	0	0.002183	0	0	0	0	0.000598	0	0.00035	0.00024	0
D(109)	0	0	0	0.000745	0	0.001416	0	0	0	0	0	0	0.000566	0	0	0.000175	0.00048	0
D(170)	0	0	0	0	0	0.002833	0	0	0	0	0	0	0	0	0.000531	0	0.00048	0
A(585)	0	0	0	0	0	0	0	0.003851	0	0	0	0	0	0	0.000266	0.000175	0.00024	0
P(461)	0	0	0	0	0	0	0	0	0	0	0.00155	0	0.000566	0	0	0.000526	0.00024	0
K(59)	0	0	0	0	0	0	0	0	0	0	0	0.000978	0	0.000598	0.000797	0.000175	0	0
T(148)	0	0	0	0	0	0	0	0	0	0	0	0	0.001132	0.001196	0	0	0.00048	0
V(353)	0	0	0	0.000745	0	0	0	0	0	0	0	0	0	0.000598	0	0	0.000721	0
S(772)	0	0	0	0	0	0	0	0	0	0.001815	0	0	0.000566	0.001794	0	0	0	0
V(299)	0	0	0	0	0	0.001416	0.001562	0	0.002183	0	0.00155	0	0	0	0.000266	0	0	0
P(264)	0	0	0	0	0	0	0.001562	0	0	0	0	0	0	0	0.000531	0.000175	0.00024	0
E(729)	0	0	0.001094	0	0	0	0	0	0	0	0	0	0	0	0.000266	0	0.000721	0
D(303)	0	0	0	0	0	0.001416	0.001562	0	0	0	0	0	0.001132	0	0	0	0.00024	0
R(750)	0	0	0	0	0.001038	0	0	0	0	0	0	0	0	0	0.000531	0.000175	0.00024	0
V(330)	0	0	0	0	0	0	0	0	0	0	0	0.000978	0	0	0.000797	0.000175	0	0
A(311)	0	0	0	0	0	0	0	0	0.004367	0	0	0	0.000566	0.000598	0	0.000175	0	0
L(247)	0	0	0	0	0.001038	0	0	0.001284	0	0	0	0.000978	0	0	0.000531	0	0	0
D(107)	0	0	0	0	0	0	0	0	0	0	0	0	0	0.000598	0	0.000701	0	0
E(876)	0	0	0	0.000745	0	0	0	0	0	0	0.003101	0	0.000566	0	0	0	0.00024	0
L(514)	0	0	0	0	0	0	0	0	0	0.001815	0	0	0	0.000598	0.000266	0.00035	0	0
Q(357)	0	0	0	0	0	0	0	0	0	0	0	0.000978	0	0	0	0.000175	0.000721	0
D(481)	0	0	0	0	0	0	0	0	0	0	0.00155	0	0.001132	0	0.000266	0.000175	0	0
I(536)	0	0	0	0.000745	0	0	0.003125	0	0	0	0	0	0	0.000598	0	0.000175	0	0
V(315)	0	0	0	0	0	0	0	0	0	0	0	0.000978	0	0	0	0.000526	0.00024	0
I(86)	0	0	0	0	0	0	0	0	0	0	0.00155	0	0	0	0	0.000175	0.000721	0
D(445)	0	0	0	0	0	0	0.001562	0	0.002183	0.00363	0	0	0	0	0	0.000175	0	0
R(173)	0	0	0	0.000745	0	0.002833	0	0	0	0	0	0	0	0	0	0.00035	0	0
P(112)	0	0	0	0	0	0	0	0	0	0	0	0	0	0.001794	0.000531	0	0	0
S(434)	0	0	0.001094	0	0	0	0.001562	0	0	0	0	0	0.000566	0	0	0	0.00048	0
Q(81)	0	0	0	0	0	0	0	0	0	0	0	0	0	0.000598	0.001063	0	0	0
A(554)	0	0	0	0.000745	0	0	0	0	0	0	0.00155	0	0	0	0	0.000526	0	0
K(718)	0	0	0	0	0	0	0	0	0	0	0	0	0	0.000598	0	0.000526	0.00024	0
A(43)	0	0	0	0	0	0.001416	0.003125	0.001284	0	0	0	0	0	0	0	0.000175	0	0
A(625)	0	0	0	0.002981	0	0	0	0.001284	0	0	0	0	0	0	0	0	0	0
R(583)	0	0	0	0.000745	0	0	0	0	0	0	0	0	0	0	0.000266	0	0.00048	0
V(587)	0	0	0	0	0	0	0	0	0	0	0	0	0.000566	0	0	0	0.000721	0
Y(530)	0	0	0	0	0	0	0	0	0	0	0	0	0.001132	0.000598	0	0.000175	0	0
T(644)	0	0	0	0	0	0	0	0	0	0	0.00155	0	0	0.000598	0	0.000175	0.00024	0
S(325)	0	0	0	0	0	0	0	0.001284	0	0.001815	0	0.000978	0	0.000598	0	0	0	0
D(499)	0	0	0	0	0.001038	0	0	0	0	0	0	0	0.000566	0.000598	0	0	0.00024	0
V(742)	0	0	0	0	0	0	0	0.001284	0	0.005445	0	0	0	0	0	0	0	0
S(520)	0	0	0	0	0	0	0	0	0	0	0	0	0.001132	0	0.000266	0	0.00024	0
V(737)	0	0	0	0	0	0.002833	0.001562	0	0	0	0	0	0	0	0	0.000175	0	0
S(343)	0	0	0	0	0	0	0	0.001284	0	0	0	0	0.001132	0	0.000266	0	0	0
R(457)	0	0	0	0.000745	0	0	0	0	0	0	0.00155	0	0	0	0.000266	0.000175	0	0
A(443)	0	0	0	0	0	0	0	0	0	0	0.00155	0	0	0	0	0.00035	0.00024	0
A(423)	0	0	0	0	0	0	0	0	0	0.001815	0	0.000978	0	0	0.000266	0.000175	0	0
A(699)	0	0	0	0	0	0	0.001562	0	0	0	0	0.002935	0	0	0	0	0	0
V(405)	0	0	0	0	0.001038	0.001416	0	0	0	0	0	0	0	0	0	0.000175	0.00024	0
A(399)	0	0	0	0	0	0	0	0	0	0	0	0	0	0.000598	0	0.000175	0.00048	0
M(380)	0	0	0	0	0	0	0	0.001284	0	0	0	0	0	0.000598	0	0.00035	0	0
A(379)	0	0	0	0	0	0.001416	0	0	0	0	0.00155	0	0	0	0	0.00035	0	0
H(725)	0	0	0	0	0.002077	0	0	0	0	0	0	0	0	0	0.000531	0	0	0
K(783)	0	0	0	0	0	0	0	0.003851	0	0	0	0	0	0	0.000266	0	0	0
I(632)	0	0	0	0	0	0	0	0	0	0	0	0	0	0	0	0.000175	0.000721	0
N(177)	0	0	0	0	0	0	0	0	0.002183	0	0	0	0.001132	0	0	0.000175	0	0
D(269)	0	0	0	0	0	0.001416	0	0	0	0	0	0	0	0.000598	0	0.00035	0	0
R(183)	0	0	0	0	0	0	0	0	0	0	0	0	0	0	0	0.000701	0	0
R(181)	0	0	0	0	0	0	0	0	0	0	0	0.000978	0	0	0	0.00035	0.00024	0
V(174)	0	0	0.001094	0	0	0	0	0	0	0	0.00155	0	0	0	0	0.000175	0.00024	0
N(213)	0	0	0	0	0	0	0	0	0	0.001815	0	0	0	0	0	0.000526	0	0
K(160)	0	0	0	0	0	0	0	0.001284	0	0	0	0	0	0.000598	0	0	0.00048	0
N(150)	0	0	0	0	0.001038	0	0	0	0.002183	0.00363	0	0	0	0	0	0	0	0
M(242)	0	0	0	0	0.003115	0	0	0	0	0	0	0	0	0.000598	0	0	0	0
I(244)	0	0	0	0	0	0	0	0	0.002183	0	0	0	0	0	0.000266	0.00035	0	0
T(246)	0	0	0	0	0.001038	0	0	0	0	0	0	0	0	0	0.000266	0.00035	0	0
V(128)	0	0	0	0	0	0	0	0	0	0	0	0	0	0	0.000531	0	0.00048	0
K(103)	0	0	0	0	0	0	0	0.001284	0	0	0	0	0	0	0	0.000175	0.00048	0
N(781)	0	0	0	0	0	0	0	0.001284	0	0	0	0	0	0	0.000266	0.00035	0	0
H(882)	0	0	0.001094	0	0	0	0.001562	0	0	0	0	0	0	0	0.000266	0	0.00024	0
V(190)	0	0	0	0	0	0	0	0	0	0	0	0	0.000566	0	0	0.000526	0	0
R(279)	0	0	0	0	0.001038	0	0	0	0	0	0.00155	0	0	0.000598	0	0	0.00024	0
G(44)	0	0	0	0	0.001038	0	0	0.001284	0	0.001815	0	0	0.000566	0	0	0	0	0
Y(273)	0	0	0	0	0	0	0	0	0	0	0	0	0	0	0	0.000175	0.000721	0
T(76)	0	0	0	0	0	0	0	0	0	0	0	0	0	0	0	0.000175	0.000721	0
C(12)	0	0	0	0	0	0	0	0	0	0	0.00155	0.000978	0	0	0	0.00035	0	0
A(46)	0	0	0	0	0.001038	0	0	0	0	0	0	0	0	0.000598	0.000531	0	0	0
P(412)	0	0	0	0	0	0	0	0	0	0	0	0	0	0	0	0	0.000721	0
D(824)	0	0	0.001094	0	0	0	0	0	0	0	0	0	0.001132	0	0	0	0	0
T(926)	0	0	0.001094	0	0	0	0.001562	0.001284	0	0	0	0	0	0	0	0	0	0
P(830)	0	0	0	0.000745	0	0	0	0	0	0	0	0	0	0.000598	0	0	0.00024	0
E(436)	0	0	0	0	0	0	0.001562	0.002567	0	0	0	0	0	0	0	0	0	0
E(922)	0	0	0	0	0	0	0	0	0	0	0.00155	0.000978	0	0	0	0	0.00024	0
L(838)	0	0	0.001094	0	0	0	0	0	0	0	0	0.001957	0	0	0	0	0	0
W(162)	0	0	0	0	0	0	0	0	0	0	0	0.001957	0	0	0	0	0.00024	0
E(919)	0	0	0	0	0	0	0	0	0.002183	0	0	0	0.000566	0	0	0.000175	0	0
N(911)	0	0	0	0	0	0	0.001562	0	0	0	0	0.001957	0	0	0	0	0	0
M(566)	0	0	0	0	0	0	0	0.001284	0	0	0	0	0	0.001196	0	0	0	0
Y(149)	0	0	0	0	0	0	0	0	0	0	0	0.000978	0	0.000598	0.000266	0	0	0
T(582)	0	0	0	0	0	0	0	0	0	0	0	0	0	0	0	0	0.000721	0
A(130)	0	0	0	0	0	0	0	0	0	0	0	0	0	0	0.000266	0.000175	0.00024	0
M(519)	0	0	0	0	0	0	0	0	0	0	0	0	0	0.000598	0	0.000175	0.00024	0
L(648)	0	0	0	0	0	0	0	0	0	0	0	0	0	0	0	0	0.000721	0
D(67)	0	0	0	0	0	0	0	0	0	0	0	0	0	0	0.000531	0.000175	0	0
K(121)	0	0	0	0	0	0	0	0.003851	0	0	0	0	0	0	0	0	0	0
M(668)	0	0	0	0	0	0.001416	0	0	0	0	0	0	0	0.000598	0	0	0.00024	0
V(704)	0	0	0	0	0	0	0	0	0.002183	0	0	0	0.000566	0	0	0.000175	0	0
L(869)	0	0	0	0	0	0	0	0	0	0	0	0.000978	0	0	0	0.000175	0.00024	0
L(90)	0	0	0	0	0	0	0	0	0	0	0	0	0	0	0.000266	0	0.00048	0
F(77)	0	0	0	0	0.002077	0	0	0	0	0.001815	0	0	0	0	0	0	0	0
I(106)	0	0	0	0.000745	0	0	0	0.001284	0.002183	0	0	0	0	0	0	0	0	0
I(307)	0	0	0	0	0	0	0	0	0	0	0.00155	0	0	0	0	0	0.00048	0
S(1)	0	0	0	0.000745	0	0	0	0	0	0	0	0	0	0.000598	0	0	0.00024	0
G(712)	0	0	0	0	0.001038	0	0	0	0	0	0	0	0	0	0.000531	0	0	0
M(818)	0	0	0	0	0	0	0	0.003851	0	0	0	0	0	0	0	0	0	0
L(270)	0	0	0	0.000745	0	0	0	0	0	0	0	0.000978	0.000566	0	0	0	0	0
R(721)	0	0	0	0	0	0	0	0	0	0.001815	0	0.000978	0	0	0	0.000175	0	0
Q(773)	0	0	0	0	0	0	0	0	0	0	0	0	0	0	0	0.000526	0	0
S(768)	0	0	0	0	0	0	0	0	0	0	0	0	0	0	0.000266	0.00035	0	0
L(212)	0	0	0	0	0	0.001416	0	0	0	0	0	0	0	0	0	0	0.00048	0
E(278)	0	0	0	0	0	0	0	0	0	0	0	0.000978	0	0	0	0	0.00048	0
L(282)	0	0	0	0	0	0	0	0	0	0	0	0	0	0	0.000531	0.000175	0	0
F(782)	0	0	0	0	0	0	0	0.003851	0	0	0	0	0	0	0	0	0	0
N(198)	0.037037	0	0	0	0	0	0	0	0	0.001815	0	0	0	0	0	0.000175	0	0
C(193)	0	0	0	0	0	0	0	0.003851	0	0	0	0	0	0	0	0	0	0
A(400)	0	0	0	0	0	0	0	0	0	0.001815	0.00155	0	0	0	0	0	0.00024	0
H(295)	0	0	0	0	0	0	0	0	0	0	0	0	0	0.000598	0	0.000175	0.00024	0
C(22)	0	0	0	0	0	0	0	0	0.004367	0	0	0	0	0	0	0	0	0
T(586)	0	0	0	0	0	0	0	0	0	0.001815	0	0	0	0	0.000266	0	0	0
K(263)	0	0	0	0	0	0	0	0.002567	0	0	0	0	0	0	0	0	0	0
V(320)	0	0	0	0	0	0	0	0	0	0	0	0	0.000566	0	0.000266	0	0	0
E(84)	0	0	0	0	0	0	0	0.001284	0	0	0	0.000978	0	0	0	0	0	0
S(78)	0	0	0	0	0	0	0	0.001284	0	0	0	0	0	0	0	0	0.00024	0
S(564)	0	0	0	0	0	0	0	0.002567	0	0	0	0	0	0	0	0	0	0
L(630)	0	0	0	0	0	0	0	0	0	0.001815	0	0	0	0.000598	0	0	0	0
V(342)	0	0	0	0	0	0	0	0.001284	0	0	0	0	0	0	0.000266	0	0	0
V(71)	0	0	0	0	0	0	0	0	0	0	0	0	0	0	0.000266	0.000175	0	0
V(341)	0	0	0	0	0	0	0	0.001284	0	0	0	0	0	0	0.000266	0	0	0
M(615)	0	0	0.001094	0	0	0	0	0	0	0	0	0.000978	0	0	0	0	0	0
E(61)	0	0	0	0	0	0	0	0	0	0	0	0	0	0	0	0.00035	0	0
Q(57)	0	0	0	0	0	0	0	0.001284	0	0	0	0	0	0	0	0.000175	0	0
G(596)	0	0	0	0	0	0	0	0	0	0	0	0	0	0	0	0	0.00048	0
K(47)	0	0	0	0	0	0	0	0.001284	0.002183	0	0	0	0	0	0	0	0	0
R(349)	0	0	0	0	0	0	0	0	0	0	0	0	0	0.001196	0	0	0	0
Y(289)	0	0	0	0	0	0	0.001562	0	0	0	0	0	0	0	0.000266	0	0	0
F(326)	0	0	0	0	0	0.001416	0	0	0	0	0	0	0	0.000598	0	0	0	0
F(283)	0	0	0	0	0	0	0	0	0	0	0	0	0	0.000598	0	0.000175	0	0
F(35)	0	0	0	0	0	0	0.001562	0	0	0	0	0.000978	0	0	0	0	0	0
S(27)	0	0	0	0	0	0	0	0	0	0	0	0	0.000566	0	0	0.000175	0	0
V(335)	0	0	0	0	0	0	0	0.001284	0	0	0	0	0	0	0.000266	0	0	0
V(410)	0	0	0	0	0	0	0	0	0	0	0	0	0	0	0	0.00035	0	0
M(633)	0	0	0	0	0	0	0	0	0	0	0	0	0.000566	0	0	0.000175	0	0
K(159)	0	0	0	0	0	0.001416	0	0	0	0	0	0	0.000566	0	0	0	0	0
D(418)	0	0	0	0	0.002077	0	0	0	0	0	0	0	0	0	0	0	0	0
D(421)	0	0	0	0	0	0	0	0.001284	0	0	0	0	0	0	0.000266	0	0	0
F(422)	0	0	0	0	0	0	0	0	0.004367	0	0	0	0	0	0	0	0	0
R(197)	0	0	0	0	0	0	0	0	0	0	0	0.000978	0	0	0	0.000175	0	0
V(424)	0	0	0	0	0	0	0	0	0	0	0	0	0	0.001196	0	0	0	0
S(425)	0	0	0	0	0	0	0	0	0	0	0	0	0	0	0	0	0.00048	0
D(304)	0	0	0	0	0	0	0	0.001284	0	0	0	0	0	0	0	0	0.00024	0
H(439)	0	0	0	0	0	0	0	0	0	0	0	0	0	0	0	0.00035	0	0
K(391)	0	0	0	0	0	0	0	0	0	0	0	0	0.000566	0	0	0	0.00024	0
A(199)	0	0	0	0	0	0	0	0	0	0	0	0	0	0.000598	0	0	0.00024	0
N(168)	0	0	0	0	0	0	0	0	0	0	0	0	0	0.001196	0	0	0	0
I(450)	0	0	0	0	0	0	0	0	0	0	0.00155	0	0.000566	0	0	0	0	0
N(215)	0	0	0	0	0	0	0	0	0	0	0	0.000978	0	0	0	0	0.00024	0
V(472)	0	0	0	0	0	0	0	0	0	0	0	0	0	0	0	0.00035	0	0
D(260)	0	0	0	0	0	0	0	0	0	0	0	0	0	0	0.000266	0	0.00024	0
F(222)	0	0	0	0.000745	0	0	0	0	0	0	0	0	0.000566	0	0	0	0	0
V(475)	0	0	0	0	0	0	0	0	0	0	0	0	0	0	0	0	0.00048	0
G(228)	0	0	0	0	0	0	0	0	0	0	0	0	0	0	0	0.000175	0.00024	0
V(147)	0	0	0	0	0	0	0	0	0	0	0	0	0	0	0.000266	0.000175	0	0
G(137)	0	0	0	0	0	0	0	0	0	0	0	0.001957	0	0	0	0	0	0
D(484)	0	0	0	0	0	0	0	0	0.004367	0	0	0	0	0	0	0	0	0
V(495)	0	0	0	0	0.001038	0	0	0	0.002183	0	0	0	0	0	0	0	0	0
D(135)	0	0	0	0	0	0	0	0	0	0	0	0	0	0	0	0.00035	0	0
L(245)	0	0	0	0	0	0	0	0	0	0	0	0	0	0	0	0.00035	0	0
S(255)	0	0	0	0	0	0	0	0	0	0	0	0	0	0.000598	0	0	0.00024	0
H(355)	0	0	0	0	0	0	0	0	0	0	0	0	0.001132	0	0	0	0	0
L(119)	0	0	0	0	0	0	0	0	0	0	0	0	0	0	0	0.000175	0.00024	0
T(259)	0	0	0	0	0	0	0	0	0	0	0	0	0.001132	0	0	0	0	0
E(522)	0	0	0	0	0	0	0	0	0	0	0	0	0	0	0	0.00035	0	0
I(466)	0	0	0	0	0	0.001416	0	0	0	0	0	0	0	0	0	0.000175	0	0
V(667)	0	0	0	0	0	0	0	0	0	0	0	0	0.000566	0.000598	0	0	0	0
D(804)	0	0	0	0	0	0	0	0	0.002183	0	0	0	0	0	0	0.000175	0	0
A(685)	0	0	0	0	0	0	0	0	0	0	0	0	0	0	0.000266	0.000175	0	0
A(878)	0	0	0	0.000745	0	0	0	0	0	0	0	0	0	0	0	0	0.00024	0
E(802)	0	0	0	0	0	0	0	0	0	0	0	0	0.000566	0	0	0.000175	0	0
A(660)	0	0	0	0	0	0	0	0	0	0	0.00155	0	0	0	0	0.000175	0	0
A(747)	0	0	0	0	0	0	0	0	0	0	0	0	0.001132	0	0	0	0	0
G(774)	0	0	0.001094	0	0	0	0	0	0	0	0	0	0	0	0	0.000175	0	0
R(726)	0	0	0	0	0	0	0	0	0	0	0	0	0	0	0.000266	0	0.00024	0
I(856)	0	0	0	0	0	0.001416	0	0	0	0	0	0	0	0	0	0.000175	0	0
M(756)	0	0	0	0	0	0	0.001562	0	0	0	0	0	0	0	0.000266	0	0	0
P(873)	0	0	0	0	0	0	0	0	0	0	0	0	0	0	0.000531	0	0	0
V(720)	0	0	0	0	0	0	0	0	0	0	0	0	0	0.001196	0	0	0	0
A(797)	0	0	0	0	0	0.001416	0	0	0	0	0	0	0	0.000598	0	0	0	0
V(905)	0	0	0	0	0	0	0	0	0	0	0	0	0	0	0.000531	0	0	0
N(722)	0	0	0	0	0	0	0	0	0	0	0	0	0	0	0.000531	0	0	0
N(705)	0	0	0	0	0	0	0	0.002567	0	0	0	0	0	0	0	0	0	0
S(364)	0	0	0	0	0	0	0	0	0	0	0	0	0	0	0	0.000175	0	0
V(96)	0	0	0	0	0	0	0	0	0	0	0	0	0	0	0	0.000175	0	0
V(675)	0	0	0	0	0	0	0	0	0	0	0	0	0	0	0	0	0.00024	0
I(114)	0	0	0	0	0	0	0	0	0	0	0	0	0	0	0	0	0.00024	0
K(369)	0	0	0	0	0	0	0	0	0	0.001815	0	0	0	0	0	0	0	0
I(494)	0	0	0	0	0	0	0	0	0	0	0	0	0	0	0	0.000175	0	0
T(801)	0	0	0	0	0	0	0	0	0	0	0.00155	0	0	0	0	0	0	0
H(872)	0	0	0	0	0	0	0	0	0	0	0	0	0	0.000598	0	0	0	0
V(493)	0	0	0	0	0	0	0	0	0	0.001815	0	0	0	0	0	0	0	0
H(362)	0	0	0	0	0	0	0	0	0	0	0	0	0	0	0.000266	0	0	0
G(670)	0	0	0	0	0	0	0	0	0	0	0	0	0	0	0	0.000175	0	0
N(874)	0	0	0	0	0	0	0.001562	0	0	0	0	0	0	0	0	0	0	0
V(233)	0	0	0	0	0	0	0	0	0	0	0	0	0	0	0	0.000175	0	0
M(542)	0	0	0	0	0	0	0	0	0	0	0	0	0	0	0	0	0.00024	0
P(339)	0	0	0	0	0	0	0	0.001284	0	0	0	0	0	0	0	0	0	0
F(340)	0	0	0	0	0	0	0	0.001284	0	0	0	0	0	0	0	0	0	0
K(890)	0	0	0	0	0	0	0	0	0	0	0	0.000978	0	0	0	0	0	0
D(740)	0	0	0	0	0	0	0	0	0	0	0	0	0	0	0	0	0.00024	0
D(736)	0	0	0	0	0	0	0	0	0	0	0	0	0	0	0	0.000175	0	0
V(535)	0	0	0	0	0	0	0	0	0	0	0	0	0	0	0.000266	0	0	0
E(83)	0	0	0.001094	0	0	0	0	0	0	0	0	0	0	0	0	0	0	0
C(799)	0	0	0	0	0	0	0	0	0	0	0.00155	0	0	0	0	0	0	0
Y(884)	0	0	0	0	0	0.001416	0	0	0	0	0	0	0	0	0	0	0	0
V(231)	0	0	0	0	0	0	0	0	0	0	0	0	0	0	0	0	0.00024	0
Y(87)	0	0	0	0	0	0.001416	0	0	0	0	0	0	0	0	0	0	0	0
L(527)	0	0	0	0	0	0	0	0	0	0	0	0	0	0	0	0	0.00024	0
F(348)	0	0	0	0	0	0	0	0	0	0	0	0	0	0.000598	0	0	0	0
E(350)	0	0	0	0	0	0	0	0	0	0	0	0	0	0.000598	0	0	0	0
N(491)	0	0	0	0	0	0	0	0.001284	0	0	0	0	0	0	0	0	0	0
Q(492)	0	0	0	0	0	0	0	0.001284	0	0	0	0	0	0	0	0	0	0
T(206)	0	0	0	0	0	0	0	0	0	0	0	0	0	0	0.000266	0	0	0
R(118)	0	0	0	0	0	0	0	0	0	0	0	0	0	0	0	0.000175	0	0
V(693)	0	0	0	0	0	0	0	0	0	0	0	0	0	0	0.000266	0	0	0
Q(444)	0	0	0	0	0	0	0	0	0	0	0	0	0	0	0	0.000175	0	0
T(402)	0	0	0	0	0	0	0	0	0	0	0	0	0	0	0	0.000175	0	0
N(158)	0	0	0	0	0	0	0	0	0	0	0	0	0	0	0	0.000175	0	0
L(708)	0	0	0	0	0	0	0	0.001284	0	0	0	0	0	0	0	0	0	0
A(406)	0	0	0	0	0	0	0	0	0	0	0	0	0	0	0.000266	0	0	0
Y(163)	0	0	0	0	0	0	0	0	0	0	0	0	0	0	0	0	0.00024	0
V(435)	0	0	0	0	0	0	0	0	0	0	0	0	0	0.000598	0	0	0	0
D(164)	0	0	0	0	0	0	0	0	0	0	0	0.000978	0	0	0	0	0	0
T(710)	0	0	0	0	0	0	0.001562	0	0	0	0	0	0	0	0	0	0	0
V(166)	0	0	0	0	0	0	0	0	0	0	0	0	0	0	0	0	0.00024	0
K(430)	0	0	0	0	0	0	0	0	0	0.001815	0	0	0	0	0	0	0	0
E(167)	0	0	0	0	0	0	0	0	0	0	0	0	0.000566	0	0	0	0	0
L(186)	0	0	0	0	0	0.001416	0	0	0	0	0	0	0	0	0	0	0	0
K(821)	0	0	0	0	0	0	0	0	0	0	0	0	0	0	0.000266	0	0	0
D(825)	0	0	0	0	0	0	0	0	0	0	0	0	0	0	0.000266	0	0	0
D(833)	0	0	0	0	0	0	0	0	0	0	0	0	0	0	0	0.000175	0	0
F(192)	0	0	0	0	0	0.001416	0	0	0	0	0	0	0	0	0	0	0	0
V(398)	0	0	0	0	0	0	0	0	0	0	0	0	0	0	0.000266	0	0	0
I(488)	0	0	0	0	0	0	0	0.001284	0	0	0	0	0	0	0	0	0	0
L(470)	0	0	0	0	0	0.001416	0	0	0	0	0	0	0	0	0	0	0	0
C(482)	0	0	0	0	0	0	0	0	0	0	0	0.000978	0	0	0	0	0	0
D(336)	0	0	0	0	0	0	0	0.001284	0	0	0	0	0	0	0	0	0	0
L(127)	0	0	0	0	0	0	0	0	0	0	0	0	0	0	0	0.000175	0	0
V(476)	0	0	0	0	0	0	0	0	0	0	0	0	0	0	0.000266	0	0	0
Y(129)	0	0	0	0	0	0	0	0	0	0	0	0	0	0	0	0.000175	0	0
R(132)	0	0	0	0.000745	0	0	0	0	0	0	0	0	0	0	0	0	0	0
D(717)	0	0	0	0	0	0	0	0	0	0	0	0.000978	0	0	0	0	0	0
N(386)	0	0	0	0	0	0	0	0	0	0	0	0	0	0	0.000266	0	0	0
S(451)	0	0	0	0	0	0	0	0	0	0	0	0	0	0	0	0	0.00024	0
N(138)	0	0	0	0	0	0	0	0	0	0	0	0	0	0	0	0.000175	0	0
C(464)	0	0	0	0	0	0.001416	0	0	0	0	0	0	0	0	0	0	0	0
H(810)	0	0	0	0	0	0	0	0	0	0	0	0	0.000566	0	0	0	0	0
L(389)	0	0	0	0	0	0	0	0	0	0	0	0	0	0	0.000266	0	0	0
K(143)	0	0	0	0	0	0	0	0	0	0	0	0	0	0	0	0.000175	0	0
K(281)	0	0	0	0	0.001038	0	0	0	0	0	0	0	0	0	0	0	0	0
T(393)	0	0	0.001094	0	0	0	0	0	0	0	0	0	0	0	0	0	0	0
L(544)	0	0	0	0	0	0	0	0	0	0	0	0	0	0	0	0.000175	0	0
Q(932)	0	0	0	0	0	0	0	0	0	0	0	0	0	0	0	0.000175	0	0
K(577)	0	0	0	0	0	0	0	0	0	0	0	0	0	0	0	0.000175	0	0
E(277)	0	0	0	0	0	0	0	0	0	0	0	0	0	0	0	0.000175	0	0
F(48)	0	0	0	0	0	0	0	0	0	0	0	0	0	0	0	0	0.00024	0
S(318)	0	0	0	0	0	0	0	0	0	0	0	0	0	0	0.000266	0	0	0
F(275)	0	0	0	0	0	0	0	0	0	0	0	0	0	0	0.000266	0	0	0
W(916)	0	0	0	0	0	0	0	0	0	0	0	0	0	0	0	0	0.00024	0
D(291)	0	0	0	0	0	0	0	0	0	0	0	0	0	0	0	0	0.00024	0
Q(292)	0	0	0	0	0	0	0	0	0	0	0	0	0	0	0	0.000175	0	0
S(15)	0	0	0	0	0	0	0	0	0	0	0	0	0	0	0.000266	0	0	0
I(579)	0	0	0	0	0	0	0	0	0	0	0	0	0	0	0	0.000175	0	0
A(771)	0	0	0	0	0	0	0	0	0	0	0	0	0	0	0	0.000175	0	0
A(581)	0	0	0	0	0	0	0	0	0	0.001815	0	0	0	0	0	0	0	0
L(614)	0	0	0	0	0	0	0	0	0	0	0	0	0	0	0	0.000175	0	0
V(42)	0	0	0	0	0	0	0	0.001284	0	0	0	0	0	0	0	0	0	0
R(18)	0	0	0	0	0	0	0	0	0	0	0	0	0	0.000598	0	0	0	0
N(909)	0	0	0	0	0	0	0	0	0	0	0	0	0	0.000598	0	0	0	0
T(252)	0	0	0	0	0	0	0	0	0	0	0	0	0	0	0	0.000175	0	0
P(612)	0	0	0	0	0	0	0	0	0	0	0	0	0.000566	0	0	0	0	0
E(254)	0	0	0	0	0	0	0	0	0	0	0	0	0	0.000598	0	0	0	0
E(610)	0	0	0	0	0.001038	0	0	0	0	0	0	0	0	0	0	0	0	0
Y(238)	0	0	0	0	0	0	0	0	0	0	0	0	0.000566	0	0	0	0	0
V(609)	0	0	0	0	0	0	0	0	0	0	0	0	0	0.000598	0	0	0	0
R(914)	0	0	0	0	0	0	0	0	0	0	0	0	0	0	0	0.000175	0	0
R(651)	0	0	0	0	0	0	0	0	0	0	0	0	0	0.000598	0	0	0	0
S(592)	0	0	0	0	0	0	0	0	0	0	0	0	0	0	0.000266	0	0	0
H(256)	0	0	0	0.000745	0	0	0	0	0	0	0	0	0	0	0	0	0	0
K(267)	0	0	0	0	0	0	0	0	0	0	0	0.000978	0	0	0	0	0	0
T(769)	0	0	0	0	0	0	0	0	0	0	0	0	0	0	0	0.000175	0	0
S(649)	0	0	0	0	0	0	0	0	0	0	0	0	0	0	0	0.000175	0	0
N(64)	0	0	0	0	0	0	0	0	0	0	0	0	0	0	0	0	0.00024	0
F(56)	0	0	0	0	0	0	0	0	0	0	0	0	0	0	0	0	0.00024	0
F(334)	0	0	0	0	0	0	0	0	0	0	0	0	0	0	0	0.000175	0	0
L(329)	0	0	0	0	0	0	0	0	0	0	0	0	0	0	0	0	0.00024	0
L(240)	0	0	0	0	0	0	0	0	0	0	0	0	0	0.000598	0	0	0	0
D(3)	0	0	0	0	0	0.001416	0	0	0	0	0	0	0	0	0	0	0	0
T(929)	0	0	0	0	0	0	0	0	0	0	0	0	0	0.000598	0	0	0	0
R(331)	0	0	0	0	0	0	0	0	0	0	0	0	0	0	0.000266	0	0	0
Y(746)	0	0	0	0	0	0	0	0	0	0	0	0	0	0	0	0.000175	0	0
N(52)	0	0	0	0	0	0	0	0	0	0	0	0	0	0.000598	0	0	0	0
V(930)	0	0	0	0	0	0	0	0	0	0	0	0	0	0	0	0	0.00024	0
E(796)	0	0	0	0	0	0.001416	0	0	0	0	0	0	0	0	0	0	0	0
S(549)	0	0	0	0	0	0	0	0	0	0	0	0	0	0	0	0	0.00024	0
L(65)	0	0	0	0	0	0	0	0	0	0	0	0	0	0	0	0.000175	0	0
A(550)	0	0	0	0	0	0	0	0	0	0	0	0	0	0	0	0.000175	0	0
I(66)	0	0	0	0	0	0	0	0	0	0	0	0	0	0.000598	0	0	0	0
T(567)	0	0	0	0	0	0	0	0.001284	0	0	0	0	0	0	0	0	0	0
I(333)	0	0	0.001094	0	0	0	0	0	0	0	0	0	0	0	0	0	0	0
E(894)	0	0	0	0	0	0	0	0	0	0	0	0	0	0	0	0.000175	0	0
P(627)	0	0	0	0	0	0	0	0	0	0	0	0	0	0	0.000266	0	0	0
S(795)	0	0	0	0.000745	0	0	0	0	0	0	0	0	0	0	0	0	0	0
F(745)	0	0	0	0.000745	0	0	0	0	0	0	0	0	0	0	0	0	0	0
C(813)	0	0	0	0	0	0	0	0	0	0	0	0	0	0	0	0	0	0
F(812)	0	0	0	0	0	0	0	0	0	0	0	0	0	0	0	0	0	0
S(814)	0	0	0	0	0	0	0	0	0	0	0	0	0	0	0	0	0	0
W(268)	0	0	0	0	0	0	0	0	0	0	0	0	0	0	0	0	0	0
E(811)	0	0	0	0	0	0	0	0	0	0	0	0	0	0	0	0	0	0
I(266)	0	0	0	0	0	0	0	0	0	0	0	0	0	0	0	0	0	0
Y(265)	0	0	0	0	0	0	0	0	0	0	0	0	0	0	0	0	0	0
G(200)	0	0	0	0	0	0	0	0	0	0	0	0	0	0	0	0	0	0
A(777)	0	0	0	0	0	0	0	0	0	0	0	0	0	0	0	0	0	0
S(778)	0	0	0	0	0	0	0	0	0	0	0	0	0	0	0	0	0	0
E(180)	0	0	0	0	0	0	0	0	0	0	0	0	0	0	0	0	0	0
N(767)	0	0	0	0	0	0	0	0	0	0	0	0	0	0	0	0	0	0
Q(815)	0	0	0	0	0	0	0	0	0	0	0	0	0	0	0	0	0	0
V(820)	0	0	0	0	0	0	0	0	0	0	0	0	0	0	0	0	0	0
F(766)	0	0	0	0	0	0	0	0	0	0	0	0	0	0	0	0	0	0
L(187)	0	0	0	0	0	0	0	0	0	0	0	0	0	0	0	0	0	0
D(274)	0	0	0	0	0	0	0	0	0	0	0	0	0	0	0	0	0	0
Y(770)	0	0	0	0	0	0	0	0	0	0	0	0	0	0	0	0	0	0
K(272)	0	0	0	0	0	0	0	0	0	0	0	0	0	0	0	0	0	0
K(188)	0	0	0	0	0	0	0	0	0	0	0	0	0	0	0	0	0	0
T(189)	0	0	0	0	0	0	0	0	0	0	0	0	0	0	0	0	0	0
V(827)	0	0	0	0	0	0	0	0	0	0	0	0	0	0	0	0	0	0
L(819)	0	0	0	0	0	0	0	0	0	0	0	0	0	0	0	0	0	0
Q(191)	0	0	0	0	0	0	0	0	0	0	0	0	0	0	0	0	0	0
Y(826)	0	0	0	0	0	0	0	0	0	0	0	0	0	0	0	0	0	0
L(775)	0	0	0	0	0	0	0	0	0	0	0	0	0	0	0	0	0	0
T(817)	0	0	0	0	0	0	0	0	0	0	0	0	0	0	0	0	0	0
H(816)	0	0	0	0	0	0	0	0	0	0	0	0	0	0	0	0	0	0
Y(237)	0	0	0	0	0	0	0	0	0	0	0	0	0	0	0	0	0	0
Y(788)	0	0	0	0	0	0	0	0	0	0	0	0	0	0	0	0	0	0
V(202)	0	0	0	0	0	0	0	0	0	0	0	0	0	0	0	0	0	0
F(793)	0	0	0	0	0	0	0	0	0	0	0	0	0	0	0	0	0	0
N(790)	0	0	0	0	0	0	0	0	0	0	0	0	0	0	0	0	0	0
F(219)	0	0	0	0	0	0	0	0	0	0	0	0	0	0	0	0	0	0
G(220)	0	0	0	0	0	0	0	0	0	0	0	0	0	0	0	0	0	0
D(221)	0	0	0	0	0	0	0	0	0	0	0	0	0	0	0	0	0	0
L(805)	0	0	0	0	0	0	0	0	0	0	0	0	0	0	0	0	0	0
I(223)	0	0	0	0	0	0	0	0	0	0	0	0	0	0	0	0	0	0
Q(224)	0	0	0	0	0	0	0	0	0	0	0	0	0	0	0	0	0	0
N(791)	0	0	0	0	0	0	0	0	0	0	0	0	0	0	0	0	0	0
V(792)	0	0	0	0	0	0	0	0	0	0	0	0	0	0	0	0	0	0
M(794)	0	0	0	0	0	0	0	0	0	0	0	0	0	0	0	0	0	0
I(779)	0	0	0	0	0	0	0	0	0	0	0	0	0	0	0	0	0	0
W(800)	0	0	0	0	0	0	0	0	0	0	0	0	0	0	0	0	0	0
P(243)	0	0	0	0	0	0	0	0	0	0	0	0	0	0	0	0	0	0
G(230)	0	0	0	0	0	0	0	0	0	0	0	0	0	0	0	0	0	0
L(178)	0	0	0	0	0	0	0	0	0	0	0	0	0	0	0	0	0	0
L(241)	0	0	0	0	0	0	0	0	0	0	0	0	0	0	0	0	0	0
K(798)	0	0	0	0	0	0	0	0	0	0	0	0	0	0	0	0	0	0
D(235)	0	0	0	0	0	0	0	0	0	0	0	0	0	0	0	0	0	0
S(239)	0	0	0	0	0	0	0	0	0	0	0	0	0	0	0	0	0	0
S(236)	0	0	0	0	0	0	0	0	0	0	0	0	0	0	0	0	0	0
D(218)	0	0	0	0	0	0	0	0	0	0	0	0	0	0	0	0	0	0
Y(217)	0	0	0	0	0	0	0	0	0	0	0	0	0	0	0	0	0	0
W(216)	0	0	0	0	0	0	0	0	0	0	0	0	0	0	0	0	0	0
K(807)	0	0	0	0	0	0	0	0	0	0	0	0	0	0	0	0	0	0
G(203)	0	0	0	0	0	0	0	0	0	0	0	0	0	0	0	0	0	0
L(261)	0	0	0	0	0	0	0	0	0	0	0	0	0	0	0	0	0	0
S(784)	0	0	0	0	0	0	0	0	0	0	0	0	0	0	0	0	0	0
V(785)	0	0	0	0	0	0	0	0	0	0	0	0	0	0	0	0	0	0
L(786)	0	0	0	0	0	0	0	0	0	0	0	0	0	0	0	0	0	0
V(204)	0	0	0	0	0	0	0	0	0	0	0	0	0	0	0	0	0	0
Y(787)	0	0	0	0	0	0	0	0	0	0	0	0	0	0	0	0	0	0
L(205)	0	0	0	0	0	0	0	0	0	0	0	0	0	0	0	0	0	0
L(207)	0	0	0	0	0	0	0	0	0	0	0	0	0	0	0	0	0	0
D(208)	0	0	0	0	0	0	0	0	0	0	0	0	0	0	0	0	0	0
N(209)	0	0	0	0	0	0	0	0	0	0	0	0	0	0	0	0	0	0
Q(210)	0	0	0	0	0	0	0	0	0	0	0	0	0	0	0	0	0	0
D(211)	0	0	0	0	0	0	0	0	0	0	0	0	0	0	0	0	0	0
P(809)	0	0	0	0	0	0	0	0	0	0	0	0	0	0	0	0	0	0
A(253)	0	0	0	0	0	0	0	0	0	0	0	0	0	0	0	0	0	0
G(808)	0	0	0	0	0	0	0	0	0	0	0	0	0	0	0	0	0	0
L(251)	0	0	0	0	0	0	0	0	0	0	0	0	0	0	0	0	0	0
G(214)	0	0	0	0	0	0	0	0	0	0	0	0	0	0	0	0	0	0
Q(789)	0	0	0	0	0	0	0	0	0	0	0	0	0	0	0	0	0	0
Y(828)	0	0	0	0	0	0	0	0	0	0	0	0	0	0	0	0	0	0
E(144)	0	0	0	0	0	0	0	0	0	0	0	0	0	0	0	0	0	0
P(832)	0	0	0	0	0	0	0	0	0	0	0	0	0	0	0	0	0	0
R(55)	0	0	0	0	0	0	0	0	0	0	0	0	0	0	0	0	0	0
G(897)	0	0	0	0	0	0	0	0	0	0	0	0	0	0	0	0	0	0
H(898)	0	0	0	0	0	0	0	0	0	0	0	0	0	0	0	0	0	0
M(899)	0	0	0	0	0	0	0	0	0	0	0	0	0	0	0	0	0	0
L(900)	0	0	0	0	0	0	0	0	0	0	0	0	0	0	0	0	0	0
E(58)	0	0	0	0	0	0	0	0	0	0	0	0	0	0	0	0	0	0
D(901)	0	0	0	0	0	0	0	0	0	0	0	0	0	0	0	0	0	0
C(54)	0	0	0	0	0	0	0	0	0	0	0	0	0	0	0	0	0	0
Y(175)	0	0	0	0	0	0	0	0	0	0	0	0	0	0	0	0	0	0
C(53)	0	0	0	0	0	0	0	0	0	0	0	0	0	0	0	0	0	0
M(902)	0	0	0	0	0	0	0	0	0	0	0	0	0	0	0	0	0	0
K(50)	0	0	0	0	0	0	0	0	0	0	0	0	0	0	0	0	0	0
L(49)	0	0	0	0	0	0	0	0	0	0	0	0	0	0	0	0	0	0
Y(903)	0	0	0	0	0	0	0	0	0	0	0	0	0	0	0	0	0	0
S(904)	0	0	0	0	0	0	0	0	0	0	0	0	0	0	0	0	0	0
T(896)	0	0	0	0	0	0	0	0	0	0	0	0	0	0	0	0	0	0
L(895)	0	0	0	0	0	0	0	0	0	0	0	0	0	0	0	0	0	0
Y(69)	0	0	0	0	0	0	0	0	0	0	0	0	0	0	0	0	0	0
F(70)	0	0	0	0	0	0	0	0	0	0	0	0	0	0	0	0	0	0
H(892)	0	0	0	0	0	0	0	0	0	0	0	0	0	0	0	0	0	0
V(72)	0	0	0	0	0	0	0	0	0	0	0	0	0	0	0	0	0	0
K(73)	0	0	0	0	0	0	0	0	0	0	0	0	0	0	0	0	0	0
R(74)	0	0	0	0	0	0	0	0	0	0	0	0	0	0	0	0	0	0
H(75)	0	0	0	0	0	0	0	0	0	0	0	0	0	0	0	0	0	0
L(891)	0	0	0	0	0	0	0	0	0	0	0	0	0	0	0	0	0	0
R(889)	0	0	0	0	0	0	0	0	0	0	0	0	0	0	0	0	0	0
N(79)	0	0	0	0	0	0	0	0	0	0	0	0	0	0	0	0	0	0
I(888)	0	0	0	0	0	0	0	0	0	0	0	0	0	0	0	0	0	0
Y(887)	0	0	0	0	0	0	0	0	0	0	0	0	0	0	0	0	0	0
Q(886)	0	0	0	0	0	0	0	0	0	0	0	0	0	0	0	0	0	0
L(885)	0	0	0	0	0	0	0	0	0	0	0	0	0	0	0	0	0	0
L(883)	0	0	0	0	0	0	0	0	0	0	0	0	0	0	0	0	0	0
F(45)	0	0	0	0	0	0	0	0	0	0	0	0	0	0	0	0	0	0
L(907)	0	0	0	0	0	0	0	0	0	0	0	0	0	0	0	0	0	0
K(41)	0	0	0	0	0	0	0	0	0	0	0	0	0	0	0	0	0	0
F(920)	0	0	0	0	0	0	0	0	0	0	0	0	0	0	0	0	0	0
Q(5)	0	0	0	0	0	0	0	0	0	0	0	0	0	0	0	0	0	0
P(927)	0	0	0	0	0	0	0	0	0	0	0	0	0	0	0	0	0	0
F(7)	0	0	0	0	0	0	0	0	0	0	0	0	0	0	0	0	0	0
L(8)	0	0	0	0	0	0	0	0	0	0	0	0	0	0	0	0	0	0
N(9)	0	0	0	0	0	0	0	0	0	0	0	0	0	0	0	0	0	0
R(10)	0	0	0	0	0	0	0	0	0	0	0	0	0	0	0	0	0	0
V(11)	0	0	0	0	0	0	0	0	0	0	0	0	0	0	0	0	0	0
Y(925)	0	0	0	0	0	0	0	0	0	0	0	0	0	0	0	0	0	0
G(13)	0	0	0	0	0	0	0	0	0	0	0	0	0	0	0	0	0	0
V(14)	0	0	0	0	0	0	0	0	0	0	0	0	0	0	0	0	0	0
M(924)	0	0	0	0	0	0	0	0	0	0	0	0	0	0	0	0	0	0
A(17)	0	0	0	0	0	0	0	0	0	0	0	0	0	0	0	0	0	0
L(19)	0	0	0	0	0	0	0	0	0	0	0	0	0	0	0	0	0	0
Y(921)	0	0	0	0	0	0	0	0	0	0	0	0	0	0	0	0	0	0
E(917)	0	0	0	0	0	0	0	0	0	0	0	0	0	0	0	0	0	0
N(39)	0	0	0	0	0	0	0	0	0	0	0	0	0	0	0	0	0	0
G(23)	0	0	0	0	0	0	0	0	0	0	0	0	0	0	0	0	0	0
T(24)	0	0	0	0	0	0	0	0	0	0	0	0	0	0	0	0	0	0
G(25)	0	0	0	0	0	0	0	0	0	0	0	0	0	0	0	0	0	0
Y(915)	0	0	0	0	0	0	0	0	0	0	0	0	0	0	0	0	0	0
T(28)	0	0	0	0	0	0	0	0	0	0	0	0	0	0	0	0	0	0
D(29)	0	0	0	0	0	0	0	0	0	0	0	0	0	0	0	0	0	0
V(30)	0	0	0	0	0	0	0	0	0	0	0	0	0	0	0	0	0	0
V(31)	0	0	0	0	0	0	0	0	0	0	0	0	0	0	0	0	0	0
Y(32)	0	0	0	0	0	0	0	0	0	0	0	0	0	0	0	0	0	0
R(33)	0	0	0	0	0	0	0	0	0	0	0	0	0	0	0	0	0	0
A(34)	0	0	0	0	0	0	0	0	0	0	0	0	0	0	0	0	0	0
D(36)	0	0	0	0	0	0	0	0	0	0	0	0	0	0	0	0	0	0
I(37)	0	0	0	0	0	0	0	0	0	0	0	0	0	0	0	0	0	0
T(912)	0	0	0	0	0	0	0	0	0	0	0	0	0	0	0	0	0	0
F(881)	0	0	0	0	0	0	0	0	0	0	0	0	0	0	0	0	0	0
L(89)	0	0	0	0	0	0	0	0	0	0	0	0	0	0	0	0	0	0
V(880)	0	0	0	0	0	0	0	0	0	0	0	0	0	0	0	0	0	0
D(846)	0	0	0	0	0	0	0	0	0	0	0	0	0	0	0	0	0	0
M(855)	0	0	0	0	0	0	0	0	0	0	0	0	0	0	0	0	0	0
C(139)	0	0	0	0	0	0	0	0	0	0	0	0	0	0	0	0	0	0
L(854)	0	0	0	0	0	0	0	0	0	0	0	0	0	0	0	0	0	0
T(853)	0	0	0	0	0	0	0	0	0	0	0	0	0	0	0	0	0	0
L(142)	0	0	0	0	0	0	0	0	0	0	0	0	0	0	0	0	0	0
I(145)	0	0	0	0	0	0	0	0	0	0	0	0	0	0	0	0	0	0
L(146)	0	0	0	0	0	0	0	0	0	0	0	0	0	0	0	0	0	0
G(852)	0	0	0	0	0	0	0	0	0	0	0	0	0	0	0	0	0	0
D(851)	0	0	0	0	0	0	0	0	0	0	0	0	0	0	0	0	0	0
T(850)	0	0	0	0	0	0	0	0	0	0	0	0	0	0	0	0	0	0
K(849)	0	0	0	0	0	0	0	0	0	0	0	0	0	0	0	0	0	0
C(151)	0	0	0	0	0	0	0	0	0	0	0	0	0	0	0	0	0	0
C(152)	0	0	0	0	0	0	0	0	0	0	0	0	0	0	0	0	0	0
I(847)	0	0	0	0	0	0	0	0	0	0	0	0	0	0	0	0	0	0
D(845)	0	0	0	0	0	0	0	0	0	0	0	0	0	0	0	0	0	0
F(134)	0	0	0	0	0	0	0	0	0	0	0	0	0	0	0	0	0	0
Y(156)	0	0	0	0	0	0	0	0	0	0	0	0	0	0	0	0	0	0
F(157)	0	0	0	0	0	0	0	0	0	0	0	0	0	0	0	0	0	0
V(844)	0	0	0	0	0	0	0	0	0	0	0	0	0	0	0	0	0	0
F(843)	0	0	0	0	0	0	0	0	0	0	0	0	0	0	0	0	0	0
C(842)	0	0	0	0	0	0	0	0	0	0	0	0	0	0	0	0	0	0
G(841)	0	0	0	0	0	0	0	0	0	0	0	0	0	0	0	0	0	0
F(165)	0	0	0	0	0	0	0	0	0	0	0	0	0	0	0	0	0	0
A(840)	0	0	0	0	0	0	0	0	0	0	0	0	0	0	0	0	0	0
G(839)	0	0	0	0	0	0	0	0	0	0	0	0	0	0	0	0	0	0
I(837)	0	0	0	0	0	0	0	0	0	0	0	0	0	0	0	0	0	0
R(836)	0	0	0	0	0	0	0	0	0	0	0	0	0	0	0	0	0	0
L(172)	0	0	0	0	0	0	0	0	0	0	0	0	0	0	0	0	0	0
S(835)	0	0	0	0	0	0	0	0	0	0	0	0	0	0	0	0	0	0
P(834)	0	0	0	0	0	0	0	0	0	0	0	0	0	0	0	0	0	0
E(136)	0	0	0	0	0	0	0	0	0	0	0	0	0	0	0	0	0	0
H(133)	0	0	0	0	0	0	0	0	0	0	0	0	0	0	0	0	0	0
Y(877)	0	0	0	0	0	0	0	0	0	0	0	0	0	0	0	0	0	0
V(111)	0	0	0	0	0	0	0	0	0	0	0	0	0	0	0	0	0	0
C(93)	0	0	0	0	0	0	0	0	0	0	0	0	0	0	0	0	0	0
K(98)	0	0	0	0	0	0	0	0	0	0	0	0	0	0	0	0	0	0
H(99)	0	0	0	0	0	0	0	0	0	0	0	0	0	0	0	0	0	0
D(100)	0	0	0	0	0	0	0	0	0	0	0	0	0	0	0	0	0	0
F(101)	0	0	0	0	0	0	0	0	0	0	0	0	0	0	0	0	0	0
F(102)	0	0	0	0	0	0	0	0	0	0	0	0	0	0	0	0	0	0
K(871)	0	0	0	0	0	0	0	0	0	0	0	0	0	0	0	0	0	0
F(104)	0	0	0	0	0	0	0	0	0	0	0	0	0	0	0	0	0	0
R(105)	0	0	0	0	0	0	0	0	0	0	0	0	0	0	0	0	0	0
P(868)	0	0	0	0	0	0	0	0	0	0	0	0	0	0	0	0	0	0
Y(867)	0	0	0	0	0	0	0	0	0	0	0	0	0	0	0	0	0	0
A(866)	0	0	0	0	0	0	0	0	0	0	0	0	0	0	0	0	0	0
D(865)	0	0	0	0	0	0	0	0	0	0	0	0	0	0	0	0	0	0
I(864)	0	0	0	0	0	0	0	0	0	0	0	0	0	0	0	0	0	0
A(863)	0	0	0	0	0	0	0	0	0	0	0	0	0	0	0	0	0	0
L(131)	0	0	0	0	0	0	0	0	0	0	0	0	0	0	0	0	0	0
H(113)	0	0	0	0	0	0	0	0	0	0	0	0	0	0	0	0	0	0
S(115)	0	0	0	0	0	0	0	0	0	0	0	0	0	0	0	0	0	0
R(116)	0	0	0	0	0	0	0	0	0	0	0	0	0	0	0	0	0	0
Q(117)	0	0	0	0	0	0	0	0	0	0	0	0	0	0	0	0	0	0
L(862)	0	0	0	0	0	0	0	0	0	0	0	0	0	0	0	0	0	0
T(120)	0	0	0	0	0	0	0	0	0	0	0	0	0	0	0	0	0	0
S(861)	0	0	0	0	0	0	0	0	0	0	0	0	0	0	0	0	0	0
V(860)	0	0	0	0	0	0	0	0	0	0	0	0	0	0	0	0	0	0
T(123)	0	0	0	0	0	0	0	0	0	0	0	0	0	0	0	0	0	0
F(859)	0	0	0	0	0	0	0	0	0	0	0	0	0	0	0	0	0	0
A(125)	0	0	0	0	0	0	0	0	0	0	0	0	0	0	0	0	0	0
D(126)	0	0	0	0	0	0	0	0	0	0	0	0	0	0	0	0	0	0
R(858)	0	0	0	0	0	0	0	0	0	0	0	0	0	0	0	0	0	0
E(857)	0	0	0	0	0	0	0	0	0	0	0	0	0	0	0	0	0	0
L(280)	0	0	0	0	0	0	0	0	0	0	0	0	0	0	0	0	0	0
A(634)	0	0	0	0	0	0	0	0	0	0	0	0	0	0	0	0	0	0
C(765)	0	0	0	0	0	0	0	0	0	0	0	0	0	0	0	0	0	0
Y(516)	0	0	0	0	0	0	0	0	0	0	0	0	0	0	0	0	0	0
D(523)	0	0	0	0	0	0	0	0	0	0	0	0	0	0	0	0	0	0
C(669)	0	0	0	0	0	0	0	0	0	0	0	0	0	0	0	0	0	0
S(672)	0	0	0	0	0	0	0	0	0	0	0	0	0	0	0	0	0	0
L(673)	0	0	0	0	0	0	0	0	0	0	0	0	0	0	0	0	0	0
S(518)	0	0	0	0	0	0	0	0	0	0	0	0	0	0	0	0	0	0
D(517)	0	0	0	0	0	0	0	0	0	0	0	0	0	0	0	0	0	0
Y(515)	0	0	0	0	0	0	0	0	0	0	0	0	0	0	0	0	0	0
D(525)	0	0	0	0	0	0	0	0	0	0	0	0	0	0	0	0	0	0
Y(674)	0	0	0	0	0	0	0	0	0	0	0	0	0	0	0	0	0	0
R(513)	0	0	0	0	0	0	0	0	0	0	0	0	0	0	0	0	0	0
A(512)	0	0	0	0	0	0	0	0	0	0	0	0	0	0	0	0	0	0
K(511)	0	0	0	0	0	0	0	0	0	0	0	0	0	0	0	0	0	0
G(510)	0	0	0	0	0	0	0	0	0	0	0	0	0	0	0	0	0	0
W(509)	0	0	0	0	0	0	0	0	0	0	0	0	0	0	0	0	0	0
Q(524)	0	0	0	0	0	0	0	0	0	0	0	0	0	0	0	0	0	0
F(528)	0	0	0	0	0	0	0	0	0	0	0	0	0	0	0	0	0	0
V(764)	0	0	0	0	0	0	0	0	0	0	0	0	0	0	0	0	0	0
T(538)	0	0	0	0	0	0	0	0	0	0	0	0	0	0	0	0	0	0
Y(546)	0	0	0	0	0	0	0	0	0	0	0	0	0	0	0	0	0	0
K(545)	0	0	0	0	0	0	0	0	0	0	0	0	0	0	0	0	0	0
N(543)	0	0	0	0	0	0	0	0	0	0	0	0	0	0	0	0	0	0
Q(541)	0	0	0	0	0	0	0	0	0	0	0	0	0	0	0	0	0	0
T(540)	0	0	0	0	0	0	0	0	0	0	0	0	0	0	0	0	0	0
I(539)	0	0	0	0	0	0	0	0	0	0	0	0	0	0	0	0	0	0
P(537)	0	0	0	0	0	0	0	0	0	0	0	0	0	0	0	0	0	0
E(665)	0	0	0	0	0	0	0	0	0	0	0	0	0	0	0	0	0	0
L(663)	0	0	0	0	0	0	0	0	0	0	0	0	0	0	0	0	0	0
N(534)	0	0	0	0	0	0	0	0	0	0	0	0	0	0	0	0	0	0
R(533)	0	0	0	0	0	0	0	0	0	0	0	0	0	0	0	0	0	0
K(532)	0	0	0	0	0	0	0	0	0	0	0	0	0	0	0	0	0	0
T(531)	0	0	0	0	0	0	0	0	0	0	0	0	0	0	0	0	0	0
S(664)	0	0	0	0	0	0	0	0	0	0	0	0	0	0	0	0	0	0
K(508)	0	0	0	0	0	0	0	0	0	0	0	0	0	0	0	0	0	0
N(507)	0	0	0	0	0	0	0	0	0	0	0	0	0	0	0	0	0	0
F(506)	0	0	0	0	0	0	0	0	0	0	0	0	0	0	0	0	0	0
S(682)	0	0	0	0	0	0	0	0	0	0	0	0	0	0	0	0	0	0
F(480)	0	0	0	0	0	0	0	0	0	0	0	0	0	0	0	0	0	0
Y(479)	0	0	0	0	0	0	0	0	0	0	0	0	0	0	0	0	0	0
G(679)	0	0	0	0	0	0	0	0	0	0	0	0	0	0	0	0	0	0
T(680)	0	0	0	0	0	0	0	0	0	0	0	0	0	0	0	0	0	0
S(681)	0	0	0	0	0	0	0	0	0	0	0	0	0	0	0	0	0	0
E(474)	0	0	0	0	0	0	0	0	0	0	0	0	0	0	0	0	0	0
G(683)	0	0	0	0	0	0	0	0	0	0	0	0	0	0	0	0	0	0
P(505)	0	0	0	0	0	0	0	0	0	0	0	0	0	0	0	0	0	0
F(471)	0	0	0	0	0	0	0	0	0	0	0	0	0	0	0	0	0	0
L(469)	0	0	0	0	0	0	0	0	0	0	0	0	0	0	0	0	0	0
Q(468)	0	0	0	0	0	0	0	0	0	0	0	0	0	0	0	0	0	0
R(467)	0	0	0	0	0	0	0	0	0	0	0	0	0	0	0	0	0	0
L(931)	0	0	0	0	0	0	0	0	0	0	0	0	0	0	0	0	0	0
D(465)	0	0	0	0	0	0	0	0	0	0	0	0	0	0	0	0	0	0
G(678)	0	0	0	0	0	0	0	0	0	0	0	0	0	0	0	0	0	0
Y(483)	0	0	0	0	0	0	0	0	0	0	0	0	0	0	0	0	0	0
P(677)	0	0	0	0	0	0	0	0	0	0	0	0	0	0	0	0	0	0
G(485)	0	0	0	0	0	0	0	0	0	0	0	0	0	0	0	0	0	0
G(486)	0	0	0	0	0	0	0	0	0	0	0	0	0	0	0	0	0	0
C(487)	0	0	0	0	0	0	0	0	0	0	0	0	0	0	0	0	0	0
N(489)	0	0	0	0	0	0	0	0	0	0	0	0	0	0	0	0	0	0
A(490)	0	0	0	0	0	0	0	0	0	0	0	0	0	0	0	0	0	0
K(676)	0	0	0	0	0	0	0	0	0	0	0	0	0	0	0	0	0	0
N(496)	0	0	0	0	0	0	0	0	0	0	0	0	0	0	0	0	0	0
N(497)	0	0	0	0	0	0	0	0	0	0	0	0	0	0	0	0	0	0
L(498)	0	0	0	0	0	0	0	0	0	0	0	0	0	0	0	0	0	0
K(500)	0	0	0	0	0	0	0	0	0	0	0	0	0	0	0	0	0	0
S(501)	0	0	0	0	0	0	0	0	0	0	0	0	0	0	0	0	0	0
A(502)	0	0	0	0	0	0	0	0	0	0	0	0	0	0	0	0	0	0
G(503)	0	0	0	0	0	0	0	0	0	0	0	0	0	0	0	0	0	0
F(504)	0	0	0	0	0	0	0	0	0	0	0	0	0	0	0	0	0	0
A(547)	0	0	0	0	0	0	0	0	0	0	0	0	0	0	0	0	0	0
V(662)	0	0	0	0	0	0	0	0	0	0	0	0	0	0	0	0	0	0
K(551)	0	0	0	0	0	0	0	0	0	0	0	0	0	0	0	0	0	0
K(603)	0	0	0	0	0	0	0	0	0	0	0	0	0	0	0	0	0	0
N(611)	0	0	0	0	0	0	0	0	0	0	0	0	0	0	0	0	0	0
D(608)	0	0	0	0	0	0	0	0	0	0	0	0	0	0	0	0	0	0
C(645)	0	0	0	0	0	0	0	0	0	0	0	0	0	0	0	0	0	0
Y(606)	0	0	0	0	0	0	0	0	0	0	0	0	0	0	0	0	0	0
V(605)	0	0	0	0	0	0	0	0	0	0	0	0	0	0	0	0	0	0
C(646)	0	0	0	0	0	0	0	0	0	0	0	0	0	0	0	0	0	0
L(602)	0	0	0	0	0	0	0	0	0	0	0	0	0	0	0	0	0	0
K(593)	0	0	0	0	0	0	0	0	0	0	0	0	0	0	0	0	0	0
N(600)	0	0	0	0	0	0	0	0	0	0	0	0	0	0	0	0	0	0
H(599)	0	0	0	0	0	0	0	0	0	0	0	0	0	0	0	0	0	0
W(598)	0	0	0	0	0	0	0	0	0	0	0	0	0	0	0	0	0	0
G(597)	0	0	0	0	0	0	0	0	0	0	0	0	0	0	0	0	0	0
H(650)	0	0	0	0	0	0	0	0	0	0	0	0	0	0	0	0	0	0
Y(595)	0	0	0	0	0	0	0	0	0	0	0	0	0	0	0	0	0	0
H(642)	0	0	0	0	0	0	0	0	0	0	0	0	0	0	0	0	0	0
K(641)	0	0	0	0	0	0	0	0	0	0	0	0	0	0	0	0	0	0
G(616)	0	0	0	0	0	0	0	0	0	0	0	0	0	0	0	0	0	0
W(617)	0	0	0	0	0	0	0	0	0	0	0	0	0	0	0	0	0	0
D(618)	0	0	0	0	0	0	0	0	0	0	0	0	0	0	0	0	0	0
Y(619)	0	0	0	0	0	0	0	0	0	0	0	0	0	0	0	0	0	0
P(620)	0	0	0	0	0	0	0	0	0	0	0	0	0	0	0	0	0	0
K(621)	0	0	0	0	0	0	0	0	0	0	0	0	0	0	0	0	0	0
C(622)	0	0	0	0	0	0	0	0	0	0	0	0	0	0	0	0	0	0
D(623)	0	0	0	0	0	0	0	0	0	0	0	0	0	0	0	0	0	0
R(624)	0	0	0	0	0	0	0	0	0	0	0	0	0	0	0	0	0	0
R(640)	0	0	0	0	0	0	0	0	0	0	0	0	0	0	0	0	0	0
M(626)	0	0	0	0	0	0	0	0	0	0	0	0	0	0	0	0	0	0
N(628)	0	0	0	0	0	0	0	0	0	0	0	0	0	0	0	0	0	0
A(639)	0	0	0	0	0	0	0	0	0	0	0	0	0	0	0	0	0	0
V(637)	0	0	0	0	0	0	0	0	0	0	0	0	0	0	0	0	0	0
R(631)	0	0	0	0	0	0	0	0	0	0	0	0	0	0	0	0	0	0
F(594)	0	0	0	0	0	0	0	0	0	0	0	0	0	0	0	0	0	0
G(590)	0	0	0	0	0	0	0	0	0	0	0	0	0	0	0	0	0	0
N(552)	0	0	0	0	0	0	0	0	0	0	0	0	0	0	0	0	0	0
V(560)	0	0	0	0	0	0	0	0	0	0	0	0	0	0	0	0	0	0
N(568)	0	0	0	0	0	0	0	0	0	0	0	0	0	0	0	0	0	0
C(659)	0	0	0	0	0	0	0	0	0	0	0	0	0	0	0	0	0	0
T(565)	0	0	0	0	0	0	0	0	0	0	0	0	0	0	0	0	0	0
C(563)	0	0	0	0	0	0	0	0	0	0	0	0	0	0	0	0	0	0
I(562)	0	0	0	0	0	0	0	0	0	0	0	0	0	0	0	0	0	0
S(561)	0	0	0	0	0	0	0	0	0	0	0	0	0	0	0	0	0	0
G(559)	0	0	0	0	0	0	0	0	0	0	0	0	0	0	0	0	0	0
I(589)	0	0	0	0	0	0	0	0	0	0	0	0	0	0	0	0	0	0
A(558)	0	0	0	0	0	0	0	0	0	0	0	0	0	0	0	0	0	0
V(557)	0	0	0	0	0	0	0	0	0	0	0	0	0	0	0	0	0	0
T(556)	0	0	0	0	0	0	0	0	0	0	0	0	0	0	0	0	0	0
R(555)	0	0	0	0	0	0	0	0	0	0	0	0	0	0	0	0	0	0
Q(661)	0	0	0	0	0	0	0	0	0	0	0	0	0	0	0	0	0	0
R(553)	0	0	0	0	0	0	0	0	0	0	0	0	0	0	0	0	0	0
R(569)	0	0	0	0	0	0	0	0	0	0	0	0	0	0	0	0	0	0
Q(570)	0	0	0	0	0	0	0	0	0	0	0	0	0	0	0	0	0	0
F(571)	0	0	0	0	0	0	0	0	0	0	0	0	0	0	0	0	0	0
H(572)	0	0	0	0	0	0	0	0	0	0	0	0	0	0	0	0	0	0
Q(573)	0	0	0	0	0	0	0	0	0	0	0	0	0	0	0	0	0	0
K(574)	0	0	0	0	0	0	0	0	0	0	0	0	0	0	0	0	0	0
L(575)	0	0	0	0	0	0	0	0	0	0	0	0	0	0	0	0	0	0
L(576)	0	0	0	0	0	0	0	0	0	0	0	0	0	0	0	0	0	0
S(578)	0	0	0	0	0	0	0	0	0	0	0	0	0	0	0	0	0	0
A(580)	0	0	0	0	0	0	0	0	0	0	0	0	0	0	0	0	0	0
E(658)	0	0	0	0	0	0	0	0	0	0	0	0	0	0	0	0	0	0
N(657)	0	0	0	0	0	0	0	0	0	0	0	0	0	0	0	0	0	0
G(584)	0	0	0	0	0	0	0	0	0	0	0	0	0	0	0	0	0	0
L(655)	0	0	0	0	0	0	0	0	0	0	0	0	0	0	0	0	0	0
R(654)	0	0	0	0	0	0	0	0	0	0	0	0	0	0	0	0	0	0
Y(653)	0	0	0	0	0	0	0	0	0	0	0	0	0	0	0	0	0	0
F(652)	0	0	0	0	0	0	0	0	0	0	0	0	0	0	0	0	0	0
D(684)	0	0	0	0	0	0	0	0	0	0	0	0	0	0	0	0	0	0
T(462)	0	0	0	0	0	0	0	0	0	0	0	0	0	0	0	0	0	0
L(460)	0	0	0	0	0	0	0	0	0	0	0	0	0	0	0	0	0	0
V(338)	0	0	0	0	0	0	0	0	0	0	0	0	0	0	0	0	0	0
C(730)	0	0	0	0	0	0	0	0	0	0	0	0	0	0	0	0	0	0
H(347)	0	0	0	0	0	0	0	0	0	0	0	0	0	0	0	0	0	0
L(731)	0	0	0	0	0	0	0	0	0	0	0	0	0	0	0	0	0	0
Y(732)	0	0	0	0	0	0	0	0	0	0	0	0	0	0	0	0	0	0
R(733)	0	0	0	0	0	0	0	0	0	0	0	0	0	0	0	0	0	0
R(735)	0	0	0	0	0	0	0	0	0	0	0	0	0	0	0	0	0	0
G(337)	0	0	0	0	0	0	0	0	0	0	0	0	0	0	0	0	0	0
F(321)	0	0	0	0	0	0	0	0	0	0	0	0	0	0	0	0	0	0
F(741)	0	0	0	0	0	0	0	0	0	0	0	0	0	0	0	0	0	0
K(332)	0	0	0	0	0	0	0	0	0	0	0	0	0	0	0	0	0	0
P(328)	0	0	0	0	0	0	0	0	0	0	0	0	0	0	0	0	0	0
G(327)	0	0	0	0	0	0	0	0	0	0	0	0	0	0	0	0	0	0
T(324)	0	0	0	0	0	0	0	0	0	0	0	0	0	0	0	0	0	0
Y(748)	0	0	0	0	0	0	0	0	0	0	0	0	0	0	0	0	0	0
L(351)	0	0	0	0	0	0	0	0	0	0	0	0	0	0	0	0	0	0
G(352)	0	0	0	0	0	0	0	0	0	0	0	0	0	0	0	0	0	0
Y(728)	0	0	0	0	0	0	0	0	0	0	0	0	0	0	0	0	0	0
L(727)	0	0	0	0	0	0	0	0	0	0	0	0	0	0	0	0	0	0
N(356)	0	0	0	0	0	0	0	0	0	0	0	0	0	0	0	0	0	0
Q(724)	0	0	0	0	0	0	0	0	0	0	0	0	0	0	0	0	0	0
D(358)	0	0	0	0	0	0	0	0	0	0	0	0	0	0	0	0	0	0
V(359)	0	0	0	0	0	0	0	0	0	0	0	0	0	0	0	0	0	0
N(360)	0	0	0	0	0	0	0	0	0	0	0	0	0	0	0	0	0	0
L(361)	0	0	0	0	0	0	0	0	0	0	0	0	0	0	0	0	0	0
S(363)	0	0	0	0	0	0	0	0	0	0	0	0	0	0	0	0	0	0
R(365)	0	0	0	0	0	0	0	0	0	0	0	0	0	0	0	0	0	0
L(366)	0	0	0	0	0	0	0	0	0	0	0	0	0	0	0	0	0	0
S(367)	0	0	0	0	0	0	0	0	0	0	0	0	0	0	0	0	0	0
F(368)	0	0	0	0	0	0	0	0	0	0	0	0	0	0	0	0	0	0
E(370)	0	0	0	0	0	0	0	0	0	0	0	0	0	0	0	0	0	0
L(371)	0	0	0	0	0	0	0	0	0	0	0	0	0	0	0	0	0	0
P(322)	0	0	0	0	0	0	0	0	0	0	0	0	0	0	0	0	0	0
L(749)	0	0	0	0	0	0	0	0	0	0	0	0	0	0	0	0	0	0
V(373)	0	0	0	0	0	0	0	0	0	0	0	0	0	0	0	0	0	0
D(760)	0	0	0	0	0	0	0	0	0	0	0	0	0	0	0	0	0	0
L(758)	0	0	0	0	0	0	0	0	0	0	0	0	0	0	0	0	0	0
C(298)	0	0	0	0	0	0	0	0	0	0	0	0	0	0	0	0	0	0
N(297)	0	0	0	0	0	0	0	0	0	0	0	0	0	0	0	0	0	0
P(296)	0	0	0	0	0	0	0	0	0	0	0	0	0	0	0	0	0	0
S(759)	0	0	0	0	0	0	0	0	0	0	0	0	0	0	0	0	0	0
Y(294)	0	0	0	0	0	0	0	0	0	0	0	0	0	0	0	0	0	0
W(290)	0	0	0	0	0	0	0	0	0	0	0	0	0	0	0	0	0	0
K(751)	0	0	0	0	0	0	0	0	0	0	0	0	0	0	0	0	0	0
D(761)	0	0	0	0	0	0	0	0	0	0	0	0	0	0	0	0	0	0
K(288)	0	0	0	0	0	0	0	0	0	0	0	0	0	0	0	0	0	0
F(287)	0	0	0	0	0	0	0	0	0	0	0	0	0	0	0	0	0	0
Y(286)	0	0	0	0	0	0	0	0	0	0	0	0	0	0	0	0	0	0
A(762)	0	0	0	0	0	0	0	0	0	0	0	0	0	0	0	0	0	0
V(763)	0	0	0	0	0	0	0	0	0	0	0	0	0	0	0	0	0	0
N(300)	0	0	0	0	0	0	0	0	0	0	0	0	0	0	0	0	0	0
C(301)	0	0	0	0	0	0	0	0	0	0	0	0	0	0	0	0	0	0
I(757)	0	0	0	0	0	0	0	0	0	0	0	0	0	0	0	0	0	0
M(755)	0	0	0	0	0	0	0	0	0	0	0	0	0	0	0	0	0	0
R(305)	0	0	0	0	0	0	0	0	0	0	0	0	0	0	0	0	0	0
C(306)	0	0	0	0	0	0	0	0	0	0	0	0	0	0	0	0	0	0
S(754)	0	0	0	0	0	0	0	0	0	0	0	0	0	0	0	0	0	0
L(308)	0	0	0	0	0	0	0	0	0	0	0	0	0	0	0	0	0	0
H(309)	0	0	0	0	0	0	0	0	0	0	0	0	0	0	0	0	0	0
C(310)	0	0	0	0	0	0	0	0	0	0	0	0	0	0	0	0	0	0
F(753)	0	0	0	0	0	0	0	0	0	0	0	0	0	0	0	0	0	0
N(312)	0	0	0	0	0	0	0	0	0	0	0	0	0	0	0	0	0	0
F(313)	0	0	0	0	0	0	0	0	0	0	0	0	0	0	0	0	0	0
N(314)	0	0	0	0	0	0	0	0	0	0	0	0	0	0	0	0	0	0
H(752)	0	0	0	0	0	0	0	0	0	0	0	0	0	0	0	0	0	0
L(316)	0	0	0	0	0	0	0	0	0	0	0	0	0	0	0	0	0	0
S(635)	0	0	0	0	0	0	0	0	0	0	0	0	0	0	0	0	0	0
L(372)	0	0	0	0	0	0	0	0	0	0	0	0	0	0	0	0	0	0
Y(374)	0	0	0	0	0	0	0	0	0	0	0	0	0	0	0	0	0	0
N(459)	0	0	0	0	0	0	0	0	0	0	0	0	0	0	0	0	0	0
E(431)	0	0	0	0	0	0	0	0	0	0	0	0	0	0	0	0	0	0
N(691)	0	0	0	0	0	0	0	0	0	0	0	0	0	0	0	0	0	0
K(438)	0	0	0	0	0	0	0	0	0	0	0	0	0	0	0	0	0	0
L(437)	0	0	0	0	0	0	0	0	0	0	0	0	0	0	0	0	0	0
S(692)	0	0	0	0	0	0	0	0	0	0	0	0	0	0	0	0	0	0
S(433)	0	0	0	0	0	0	0	0	0	0	0	0	0	0	0	0	0	0
G(432)	0	0	0	0	0	0	0	0	0	0	0	0	0	0	0	0	0	0
F(429)	0	0	0	0	0	0	0	0	0	0	0	0	0	0	0	0	0	0
T(701)	0	0	0	0	0	0	0	0	0	0	0	0	0	0	0	0	0	0
F(428)	0	0	0	0	0	0	0	0	0	0	0	0	0	0	0	0	0	0
G(427)	0	0	0	0	0	0	0	0	0	0	0	0	0	0	0	0	0	0
K(426)	0	0	0	0	0	0	0	0	0	0	0	0	0	0	0	0	0	0
F(694)	0	0	0	0	0	0	0	0	0	0	0	0	0	0	0	0	0	0
N(695)	0	0	0	0	0	0	0	0	0	0	0	0	0	0	0	0	0	0
C(697)	0	0	0	0	0	0	0	0	0	0	0	0	0	0	0	0	0	0
F(440)	0	0	0	0	0	0	0	0	0	0	0	0	0	0	0	0	0	0
F(441)	0	0	0	0	0	0	0	0	0	0	0	0	0	0	0	0	0	0
F(442)	0	0	0	0	0	0	0	0	0	0	0	0	0	0	0	0	0	0
A(690)	0	0	0	0	0	0	0	0	0	0	0	0	0	0	0	0	0	0
Y(689)	0	0	0	0	0	0	0	0	0	0	0	0	0	0	0	0	0	0
G(446)	0	0	0	0	0	0	0	0	0	0	0	0	0	0	0	0	0	0
N(447)	0	0	0	0	0	0	0	0	0	0	0	0	0	0	0	0	0	0
A(448)	0	0	0	0	0	0	0	0	0	0	0	0	0	0	0	0	0	0
A(688)	0	0	0	0	0	0	0	0	0	0	0	0	0	0	0	0	0	0
T(687)	0	0	0	0	0	0	0	0	0	0	0	0	0	0	0	0	0	0
D(452)	0	0	0	0	0	0	0	0	0	0	0	0	0	0	0	0	0	0
Y(453)	0	0	0	0	0	0	0	0	0	0	0	0	0	0	0	0	0	0
D(454)	0	0	0	0	0	0	0	0	0	0	0	0	0	0	0	0	0	0
Y(455)	0	0	0	0	0	0	0	0	0	0	0	0	0	0	0	0	0	0
Y(456)	0	0	0	0	0	0	0	0	0	0	0	0	0	0	0	0	0	0
T(686)	0	0	0	0	0	0	0	0	0	0	0	0	0	0	0	0	0	0
Y(458)	0	0	0	0	0	0	0	0	0	0	0	0	0	0	0	0	0	0
Q(698)	0	0	0	0	0	0	0	0	0	0	0	0	0	0	0	0	0	0
Y(420)	0	0	0	0	0	0	0	0	0	0	0	0	0	0	0	0	0	0
A(375)	0	0	0	0	0	0	0	0	0	0	0	0	0	0	0	0	0	0
L(387)	0	0	0	0	0	0	0	0	0	0	0	0	0	0	0	0	0	0
C(395)	0	0	0	0	0	0	0	0	0	0	0	0	0	0	0	0	0	0
D(711)	0	0	0	0	0	0	0	0	0	0	0	0	0	0	0	0	0	0
R(392)	0	0	0	0	0	0	0	0	0	0	0	0	0	0	0	0	0	0
N(713)	0	0	0	0	0	0	0	0	0	0	0	0	0	0	0	0	0	0
D(390)	0	0	0	0	0	0	0	0	0	0	0	0	0	0	0	0	0	0
K(714)	0	0	0	0	0	0	0	0	0	0	0	0	0	0	0	0	0	0
I(715)	0	0	0	0	0	0	0	0	0	0	0	0	0	0	0	0	0	0
F(419)	0	0	0	0	0	0	0	0	0	0	0	0	0	0	0	0	0	0
S(384)	0	0	0	0	0	0	0	0	0	0	0	0	0	0	0	0	0	0
H(381)	0	0	0	0	0	0	0	0	0	0	0	0	0	0	0	0	0	0
L(723)	0	0	0	0	0	0	0	0	0	0	0	0	0	0	0	0	0	0
P(378)	0	0	0	0	0	0	0	0	0	0	0	0	0	0	0	0	0	0
D(377)	0	0	0	0	0	0	0	0	0	0	0	0	0	0	0	0	0	0
A(376)	0	0	0	0	0	0	0	0	0	0	0	0	0	0	0	0	0	0
F(396)	0	0	0	0	0	0	0	0	0	0	0	0	0	0	0	0	0	0
S(397)	0	0	0	0	0	0	0	0	0	0	0	0	0	0	0	0	0	0
S(709)	0	0	0	0	0	0	0	0	0	0	0	0	0	0	0	0	0	0
L(401)	0	0	0	0	0	0	0	0	0	0	0	0	0	0	0	0	0	0
N(403)	0	0	0	0	0	0	0	0	0	0	0	0	0	0	0	0	0	0
N(404)	0	0	0	0	0	0	0	0	0	0	0	0	0	0	0	0	0	0
F(407)	0	0	0	0	0	0	0	0	0	0	0	0	0	0	0	0	0	0
Q(408)	0	0	0	0	0	0	0	0	0	0	0	0	0	0	0	0	0	0
T(409)	0	0	0	0	0	0	0	0	0	0	0	0	0	0	0	0	0	0
K(411)	0	0	0	0	0	0	0	0	0	0	0	0	0	0	0	0	0	0
N(703)	0	0	0	0	0	0	0	0	0	0	0	0	0	0	0	0	0	0
G(413)	0	0	0	0	0	0	0	0	0	0	0	0	0	0	0	0	0	0
N(414)	0	0	0	0	0	0	0	0	0	0	0	0	0	0	0	0	0	0
F(415)	0	0	0	0	0	0	0	0	0	0	0	0	0	0	0	0	0	0
N(416)	0	0	0	0	0	0	0	0	0	0	0	0	0	0	0	0	0	0
K(417)	0	0	0	0	0	0	0	0	0	0	0	0	0	0	0	0	0	0
A(702)	0	0	0	0	0	0	0	0	0	0	0	0	0	0	0	0	0	0
F(317)	0	0	0	0	0	0	0	0	0	0	0	0	0	0	0	0	0	0

## Sheet: SequenceCount
	0
2019-11-30	0
2019-12-31	0
2020-01-31	27
2020-02-29	7
2020-03-31	914
2020-04-30	1342
2020-05-31	963
2020-06-30	706
2020-07-31	640
2020-08-31	779
2020-09-30	458
2020-10-31	551
2020-11-30	645
2020-12-31	1022
2021-01-31	1767
2021-02-28	1672
2021-03-31	3764
2021-04-30	5708
2021-05-31	4163
2021-06-30	2
