# Supplementary material for: SARS-CoV-2 NSP-12 mutations survey during the pandemic in the world
Source: Research Square preprint supplement (doi:10.21203/rs.3.rs-877078/v1), 2021-09-22
Supplement: Supplementary file 3 [file bbace190f1744a3e71dccb1c.xlsx]

## Sheet: nsp12
	2020-01-31	2020-02-29	2020-03-31	2020-04-30	2020-05-31	2020-06-30	2020-07-31	2020-08-31	2020-09-30	2020-10-31	2020-11-30	2020-12-31	2021-01-31	2021-02-28	2021-03-31	2021-04-30	2021-05-31	2021-06-30
P(323)	0.336424	0.032105	0.522529	0.80473	0.800329	0.898455	0.967281	0.988115	0.992841	0.996862	0.994497	0.990167	0.996975	0.992654	0.976141	0.998501	0.9891	1
A(423)	0.072848	0	0.001397	0	0.002465	0.090043	0.458288	0.504663	0.301432	0.188285	0.128653	0.084056	0.06021	0.018133	0.002426	0.00198	0.000519	0
G(671)	0	0	0	0.001819	0.004656	0.000986	0.000433	0.000731	0.003014	0.003138	0.001518	0.000952	0.010269	0.002604	0.022646	0.141879	0.299135	0.573643
A(97)	0.011921	0.001189	0.073699	0.135031	0.087647	0.05488	0.026652	0.008594	0.003768	0.001743	0.002467	0.002326	0.001688	0.001209	0.000741	0.000107	0.000346	0
M(666)	0	0	0.000699	0	0.000274	0.007887	0.006717	0.003108	0.001507	0.000697	0.004554	0.05868	0.040023	0.024363	0.003168	0.000375	0.000173	0
P(227)	0	0	0.000349	0.001819	0.001643	0.002958	0.003467	0.002011	0.007913	0.004184	0.003036	0.009621	0.019906	0.018877	0.029184	0.015199	0.006055	0
T(739)	0	0	0.000349	0	0.000548	0.000329	0.0013	0	0.00113	0	0.009488	0.019032	0.040726	0.012367	0.008829	0.002569	0.00173	0
L(829)	0	0	0.000349	0	0	0.000329	0	0	0	0.000349	0	0	7e-05	0.005579	0.037609	0.003693	0.004671	0.007752
T(26)	0	0	0.001048	0.000202	0.000274	0.000657	0	0.000183	0	0.001395	0.002846	0.008776	0.006612	0.001488	0.005594	0.003586	0.001211	0
A(379)	0	0	0	0.000202	0.002739	0.003943	0.00195	0.00128	0.000377	0.001395	0.00038	0.017128	0.00823	0.002418	0.000202	5.4e-05	0.000346	0
Q(822)	0	0	0.001397	0.000404	0.001369	0.0023	0.001517	0.003108	0.004521	0.001743	0.012524	0.013428	0.002251	0.002418	0.001618	0.000749	0.001038	0
K(478)	0	0	0.000349	0	0	0.000329	0.00065	0.001097	0.004145	0.012552	0.001518	0.001057	0.000703	0.003441	0.006538	0.004067	0.001038	0
A(383)	0	0	0	0.000202	0.000274	0.000329	0	0	0.000377	0	0.003605	0.003595	0.007104	0.00186	0.004651	0.001873	0.000519	0
A(529)	0	0	0.000349	0.000202	0.000822	0.0023	0.001733	0.000731	0.001884	0.002092	0.001898	0.001374	0.006963	0.001581	0.001011	0.000428	0.002422	0.007752
K(91)	0	0	0	0	0.001917	0.000329	0.00455	0.002743	0.001884	0.000349	0.004934	0.007718	0.001196	0.002325	0.000741	0.000428	0.000173	0
I(244)	0	0	0.000349	0.000606	0.001643	0.000657	0.000867	0.00128	0.004145	0.003138	0.002467	0.008141	0.001477	0.003348	0.000607	0.000107	0	0
A(185)	0.001325	0	0.000349	0.000404	0.000548	0.000657	0.000433	0.000183	0.003768	0.004533	0.005313	0.002855	0.003587	0.00186	0.001078	0.000428	0.002076	0.031008
L(638)	0	0	0.000349	0	0.001643	0.000986	0.002817	0.021942	0.004898	0.000349	0.00038	0.000529	0.000281	0	0.00027	0.000428	0.000346	0
V(720)	0.006623	0	0.000349	0.000202	0	0	0.000433	0	0.002638	0.006974	0.002846	0.008564	0.002603	0.000465	0.000202	5.4e-05	0	0
T(248)	0.001325	0	0.000349	0.001213	0.000274	0.000986	0	0.00128	0.000754	0.001046	0.00038	0.000634	0.000914	0.001488	0.000337	0.004389	0.00173	0
V(776)	0.001325	0	0	0.000606	0	0.000329	0.000217	0	0.002638	0.004881	0.005503	0.002115	0.002251	0.001674	0.000876	0.000375	0.000173	0
D(269)	0	0	0	0.000202	0.001643	0.000329	0.000217	0.000366	0.001507	0.001395	0.00019	0.000317	0.000492	0.003627	0.004718	0.000161	0	0
D(445)	0	0	0	0	0	0	0.000217	0.000183	0	0.000349	0	0.001269	0.00218	0.005021	0.002089	0.000321	0	0
S(647)	0	0	0.000699	0	0	0.001643	0.00195	0	0.002638	0.001395	0.000949	0.002432	0.001688	0.002232	0.001011	0.000749	0.000865	0
T(141)	0	0	0.001048	0.000606	0.004656	0.022346	0.0026	0	0.000754	0.001046	0	0.000952	0.000211	0.000465	0.000337	0.000161	0.000346	0
V(675)	0	0	0	0	0.000274	0	0	0	0	0	0.00019	0.000211	0.000352	0.002232	0.00337	0.002194	0.001038	0
K(807)	0	0	0	0	0	0.000329	0	0	0	0	0	0	0	0.000186	0.00182	0.003853	0.003633	0
A(923)	0	0	0	0	0	0	0	0	0.000377	0.000349	0.00038	0.000634	0.000141	9.3e-05	0.001415	0.003211	0.003633	0
H(613)	0	0	0.000349	0.000202	0.000274	0.002629	0	0	0.000377	0	0.001328	0.002855	0.001196	0.002883	0.001011	0.000107	0.000519	0
S(6)	0	0	0.000349	0.001011	0.001917	0.000329	0.000433	0.001463	0.00113	0.000349	0.00038	0.001163	0.001829	0.00093	0.001213	0.000749	0.000519	0
K(369)	0	0	0	0	0	0	0	0	0	0.016039	0.002846	0.001586	0.00218	0.000279	0	0	0	0
D(153)	0	0	0	0.000202	0	0.000329	0.007584	0.000183	0	0.001046	0.005693	0.000529	0.000422	0.000465	0.000741	0.000589	0	0
G(108)	0	0	0	0	0	0	0	0	0	0	0.00019	0.004652	0.00204	0.000372	0.001281	0.000214	0.000865	0
M(110)	0	0	0	0.000404	0	0	0	0.000183	0	0.000349	0.000949	0.000106	7e-05	0.000372	0.000472	0.003158	0.003979	0.007752
A(176)	0	0	0	0	0	0.000329	0	0	0	0	0.000569	0.004652	0.002532	0.001116	6.7e-05	0.000107	0	0
V(435)	0	0	0	0	0	0	0.00065	0.000183	0.000377	0	0	0.001163	0.004572	0.00093	6.7e-05	0.000107	0	0
E(744)	0	0	0.000349	0.000202	0.000548	0	0.000217	0.000731	0.00113	0.001046	0.000759	0.000952	0.000352	0.001767	0.001348	0.000696	0.001211	0
V(473)	0	0	0.001048	0.002224	0.000274	0	0.001083	0	0.000377	0	0.003226	0.002538	0.000281	0.000186	0.00027	0.000803	0.000519	0
T(803)	0	0	0	0.001011	0.010682	0.000329	0	0.000183	0.002638	0	0.00038	0.000846	0.000703	0.000651	0.000404	0.000161	0.000173	0
T(604)	0	0	0	0	0	0.000329	0	0	0	0	0	0	0.000563	0.003906	0.001348	0.000749	0.000346	0
V(330)	0	0	0	0	0.000274	0	0.000217	0.000731	0	0	0	0.000106	0.000141	0.000279	0.002831	0.001606	0.000519	0
A(526)	0.005298	0	0.001048	0.005458	0.000274	0	0.000433	0.000183	0.000754	0.000697	0.000759	0.000634	0.000492	0.000372	0.000809	0.000214	0.000173	0
T(319)	0	0	0	0.000404	0	0	0.000433	0.000366	0.000754	0.002092	0.00038	0.000423	0.000211	0.001488	0.001078	0.001124	0.000346	0
T(806)	0.002649	0	0.001746	0	0.000548	0.000329	0.0013	0.000549	0.001884	0.001395	0.000569	0.001692	0.000492	0.000279	0.000741	0.000375	0.000173	0
A(382)	0	0.001189	0.001397	0.000202	0.000274	0	0.00065	0	0.000377	0.000349	0	0.000106	0.002321	0.000558	0.000135	0.000856	0.000519	0
E(254)	0	0	0	0	0.000548	0	0.000433	0.001097	0.004145	0.005579	0.001708	0.000317	0.000281	0.000465	0	0.000321	0.001211	0
P(809)	0.001325	0	0	0	0	0	0	0	0	0	0.000569	0.000529	0.000141	0.004184	0.000404	0.000375	0	0
M(668)	0	0	0	0.000202	0	0.000329	0.000217	0	0.000377	0	0.00038	0.001586	0.000563	0.000744	0.000337	0.001338	0.000173	0.007752
A(16)	0.001325	0	0.000699	0	0.000274	0.000329	0.000867	0.000731	0.000754	0.002092	0.000569	0.001057	0.000633	0.000744	0.000741	0.000321	0.000173	0
S(607)	0	0	0	0	0	0.000986	0	0.000183	0.005275	0.011158	0.000949	0.000106	0	9.3e-05	0.000337	0.000107	0.000519	0
T(394)	0	0	0	0	0	0.000657	0.000217	0	0.000754	0	0.00038	0.00296	0.000985	0.000837	0.000404	0.000107	0	0
A(400)	0	0	0	0.000202	0.000274	0	0	0	0.006029	0.012204	0	0.000952	0	0	6.7e-05	0.000107	0	0
M(629)	0.002649	0.001189	0.000349	0	0	0.000657	0.000217	0.000366	0.000377	0.000349	0.00019	0.000211	0.001055	0.000744	0.000472	0.000696	0.001384	0
D(303)	0	0.001189	0	0.004043	0.010134	0	0.000217	0	0	0	0	0.000211	0.000211	0	6.7e-05	0	0	0
D(879)	0.001325	0	0	0.000202	0	0	0.000433	0.000366	0.00113	0.000349	0.00019	0.000952	0.001336	0.000651	0.000337	0.000268	0.000865	0
A(716)	0	0	0	0	0	0	0	0	0	0	0	0.000317	0.000492	9.3e-05	0.000539	0.00198	0.000865	0
M(463)	0	0	0	0	0	0.002629	0.0013	0.000183	0.000377	0.000349	0.000949	0.000423	0.000422	0.000465	0.000337	0.00091	0.000173	0
G(228)	0	0	0.004541	0.001617	0	0	0	0	0	0.000349	0	0	0.000281	9.3e-05	0.000135	0.001552	0.000346	0
S(913)	0.002649	0	0	0.000202	0	0.000986	0	0.000366	0	0.000697	0.000949	0.00148	0.000563	0.000837	0.000741	5.4e-05	0.000173	0
T(85)	0.002649	0.002378	0	0.002224	0	0	0	0	0.000377	0	0.00038	0.00074	0.000844	0.000651	0.000539	0.000214	0.000519	0
F(793)	0	0	0	0	0	0	0	0	0	0	0	0	0	0	0.000135	0.002355	0.001903	0
T(643)	0	0	0	0	0.000548	0.000329	0.000217	0.000183	0	0.000349	0.00019	0.000211	0	0.002604	0.000944	0.000107	0.000346	0
K(59)	0	0	0.000349	0.000202	0.001643	0.000329	0	0.000183	0.000754	0.000697	0	0.000423	0.000774	0.000465	0.00027	0.000856	0	0
M(601)	0.001325	0	0.000349	0.000202	0	0	0.000433	0.000183	0.000754	0	0.000759	0.000211	0.000352	0.000651	0.000404	0.000963	0.000519	0
A(449)	0	0	0.003144	0.001011	0.000274	0.000657	0.000433	0.000183	0	0	0	0.000846	0.000281	9.3e-05	0.00027	0.000482	0.001038	0
V(257)	0	0	0.001048	0.001011	0.000548	0.000986	0	0	0.00113	0.000349	0	0.000529	0.000492	0.000651	0.000135	0.000428	0.000865	0
V(354)	0	0	0.000349	0.000404	0.001917	0.002958	0.000433	0.001646	0.000754	0.000349	0.00019	0.00074	0.000281	0	0.000337	5.4e-05	0	0
V(848)	0	0.002378	0.000349	0.000404	0.000822	0.000657	0.000867	0.000914	0.000754	0.000697	0	0.000106	0.001055	0.000372	0.000135	0.000214	0.000173	0
A(656)	0	0	0.000349	0.000202	0.000548	0.000329	0.00195	0.000366	0.00113	0.001046	0.000949	0.000529	0.000352	0.000558	0.00027	0.000161	0	0
P(169)	0	0	0	0.000809	0.000274	0.001314	0.000217	0	0.000377	0.000697	0.000759	0.000317	0.000703	0.000558	0.000472	0.000268	0	0
P(94)	0	0	0	0	0.001096	0.000986	0	0.000183	0.000377	0.000349	0.00019	0.000106	0.000703	0.001302	0.000539	0.000161	0.000173	0
T(293)	0	0	0	0.000202	0.000274	0.001314	0	0	0	0.002092	0	0.000529	0.000844	0.000465	0.000404	0.000375	0	0.007752
D(140)	0	0	0.000349	0.000202	0.000548	0	0.000217	0	0.000754	0.000349	0.00019	0.000423	0	0.000279	0.000202	0.001445	0.000346	0
A(311)	0	0	0	0	0	0.0023	0	0	0.002261	0.001046	0	0.000211	0.000422	0	0.00027	0.000856	0.000519	0
A(399)	0	0	0.005938	0.002628	0.000548	0.000329	0.000217	0.000183	0.000377	0	0	0.000211	0	0.000651	6.7e-05	0	0	0
V(905)	0	0	0	0	0	0	0.000217	0.00256	0.003391	0.002092	0.000949	0.000317	0.000211	9.3e-05	0.000135	5.4e-05	0	0
D(893)	0	0	0.000349	0.000202	0	0.000657	0.000217	0	0.000754	0	0.00019	0.000106	7e-05	0.000372	0.000135	0.001231	0.000865	0
V(405)	0	0	0.000699	0.000606	0.000548	0	0	0.000183	0.000377	0.000697	0	0.000106	0.000633	0.00093	0.000472	0.000214	0.000346	0
R(118)	0	0	0	0	0	0.000657	0	0	0	0	0.00038	0	7e-05	0.002697	6.7e-05	0.000268	0.000692	0
M(124)	0	0	0.000349	0.000202	0	0.001314	0.000217	0.000366	0.000377	0.001046	0.000569	0.001374	0.000281	0.000372	0.000337	0.000107	0	0
P(461)	0	0	0	0	0.000548	0.000329	0.00065	0.000549	0	0	0.00019	0.000634	7e-05	9.3e-05	0	0.001231	0.000346	0
G(137)	0	0	0	0.000202	0	0	0	0	0	0	0.002657	0.000317	0.000141	0.001395	0.000472	5.4e-05	0	0
V(880)	0	0	0	0.001819	0.002465	0.002958	0.001083	0	0.000377	0.001046	0	0.000211	0.000141	0	6.7e-05	0	0	0
R(249)	0	0	0	0	0	0	0	0.000183	0.000377	0.000349	0	0.000529	0.000563	0.000744	0.000404	0.000535	0.000173	0
A(95)	0.001325	0	0	0.000404	0.000274	0.001314	0.000433	0	0.000377	0	0.000569	0	0.000211	0.000837	0.000337	0.000161	0.001211	0
T(908)	0	0	0	0.001213	0.000548	0.000329	0	0	0.000377	0.000697	0	0.000106	0.000352	0.001395	0.00027	5.4e-05	0.000346	0
M(196)	0.001325	0	0.000349	0.000606	0	0.000329	0	0.000183	0.000377	0.000349	0.000759	0.000106	0.000141	0.000186	0.000135	0.000428	0.002076	0
V(827)	0	0	0	0	0	0	0	0.001463	0	0	0	0.000211	0.00204	0	0	5.4e-05	0	0
D(910)	0	0	0	0	0	0	0	0	0	0	0.00038	0.000423	0.000633	0.000372	0.000539	0.000321	0.001038	0
I(37)	0	0	0	0	0	0	0	0	0	0	0	0	7e-05	0	0.000135	0.001927	0	0
G(179)	0	0	0.000349	0.000202	0	0.000329	0	0	0.000754	0	0	0.000317	0.000281	0.000372	0.00027	0.000107	0.002422	0.015504
R(583)	0	0	0	0	0	0	0.000217	0.000183	0	0	0	0	0.000352	0.001116	0.000607	0.000535	0	0
R(914)	0	0	0	0	0.000274	0.000329	0	0.000183	0	0	0.00019	0.000634	0.000211	0	0.000135	0.00107	0.000346	0
V(299)	0.001325	0	0	0.000202	0.000274	0.000329	0	0.000366	0	0	0.00019	0.000317	0.000703	0.000837	0.000337	0	0.000519	0
D(63)	0	0	0.000699	0.000202	0	0	0	0	0	0	0	0.002115	0.000281	0.000372	6.7e-05	0.000214	0	0
G(808)	0	0	0	0.000202	0	0	0	0	0	0	0.00038	0.000317	7e-05	0.002418	6.7e-05	0	0	0
M(906)	0	0.001189	0	0.000606	0.000274	0.000329	0.000433	0.000366	0	0.003835	0.00019	0.000106	0.000422	0.000186	0.000135	5.4e-05	0	0
G(596)	0	0	0	0	0	0.000657	0.0013	0.000549	0.001507	0	0.000949	0.000529	0.000422	9.3e-05	6.7e-05	0	0	0
D(738)	0	0	0	0	0	0	0	0	0	0.000349	0.00019	0.000106	0.000563	0.000465	0.000472	0.000375	0	0
P(264)	0.001325	0	0	0	0	0.000986	0	0.000914	0	0	0.00019	0	0.000141	0.000186	6.7e-05	0.000642	0.000519	0
D(284)	0	0	0.000699	0.000404	0	0.000329	0.000217	0.000731	0.000377	0.001743	0.00038	0.000211	0.000211	0.000372	0	5.4e-05	0.000173	0
T(801)	0.002649	0	0.001397	0	0.001643	0	0.0026	0	0	0	0.00019	0.000211	0	0	6.7e-05	5.4e-05	0	0
M(756)	0	0.001189	0.002794	0.000606	0	0.000986	0	0.000183	0.000754	0	0	0.000317	0	0.000186	0.000135	5.4e-05	0.000173	0
K(160)	0	0	0.000349	0	0	0.000329	0	0	0.000377	0.000697	0.001328	0.000106	0.000492	0.000186	0.000135	0.000107	0.000173	0
D(40)	0	0	0	0	0	0	0	0.000183	0.000377	0.000349	0.000569	0	7e-05	9.3e-05	6.7e-05	0.000856	0.000346	0
S(795)	0	0	0	0.000404	0.000548	0.000329	0.000433	0	0	0	0.002467	0	0.000211	9.3e-05	6.7e-05	5.4e-05	0	0
L(329)	0	0	0	0.000809	0.000548	0.001972	0.000433	0	0	0.000349	0.00019	0	0	0.000186	0.000135	0.000321	0	0
H(725)	0	0	0	0	0	0.000329	0.0026	0	0.000377	0	0	0.000211	0.000422	9.3e-05	0.000135	5.4e-05	0	0
D(62)	0.001325	0	0	0	0	0.000657	0	0	0	0	0.00019	0.000211	0.000422	0.000372	0.00027	0.000268	0	0
T(276)	0	0	0	0.000202	0	0.000657	0	0	0	0	0.00019	0.00074	0.000352	0.000372	6.7e-05	0.000161	0.000173	0
H(810)	0	0	0	0	0	0	0	0	0	0	0.00019	0	0.000141	0.00186	0.000135	0	0	0
P(918)	0	0	0.001048	0	0.000274	0.000329	0.000433	0.000366	0.000754	0.001046	0	0.000317	7e-05	9.3e-05	0.000202	0.000161	0	0
T(20)	0	0	0	0	0.002465	0.000329	0	0	0	0.000697	0.00019	0.000106	0.000422	0	6.7e-05	5.4e-05	0.000519	0
V(231)	0	0	0.000349	0	0	0.000657	0	0	0.000377	0.000697	0	0.000423	0.000211	0.000651	0.000135	0.000161	0	0
A(443)	0	0.001189	0.001048	0.000202	0.000548	0	0.000433	0.000366	0	0.000349	0	0.000211	0.000141	0.000372	0.000135	0.000161	0	0
R(750)	0.002649	0.001189	0	0.002628	0	0	0	0	0	0	0	0.000211	7e-05	0	6.7e-05	0.000214	0	0
T(870)	0.001325	0	0	0.000202	0.001369	0	0.000217	0.000731	0.000377	0	0.000569	0.000211	7e-05	9.3e-05	0.000135	0.000107	0	0
S(229)	0	0	0	0	0.000274	0	0	0	0	0	0	0.000211	7e-05	0.000372	0.000539	5.4e-05	0.001211	0
D(824)	0	0	0.000349	0	0	0.000986	0.000217	0.000183	0.00113	0.000349	0	0.000211	7e-05	0.000186	0.000337	0.000161	0.000173	0
E(922)	0.001325	0	0	0	0	0.000329	0	0	0	0.000349	0.00038	0.000106	0.000211	9.3e-05	0.000337	0.000375	0.000346	0
R(173)	0	0.001189	0.000349	0.000202	0.000548	0.000329	0	0.000183	0.000377	0	0.00019	0.000529	0.000211	0.000372	0.000135	5.4e-05	0	0
V(605)	0	0	0	0	0.001369	0.000329	0.001733	0.000366	0.000754	0	0.00019	0.000211	0.000141	9.3e-05	0	0	0	0
D(92)	0	0	0	0	0.000548	0.000329	0	0	0	0	0.00019	0	0.000281	0.000651	6.7e-05	0.000428	0	0
A(585)	0	0	0	0.000202	0.000548	0.000329	0	0	0	0.000697	0	0.000317	0.000281	0.000279	6.7e-05	0.000321	0	0
E(522)	0	0	0.000349	0.000404	0.002465	0.000657	0.000433	0.000366	0	0	0	0	7e-05	0.000186	6.7e-05	5.4e-05	0	0
G(823)	0.001325	0.001189	0	0.000202	0.001369	0	0.000433	0.000183	0	0	0.00019	0.000211	7e-05	9.3e-05	0.000135	0.000161	0.000346	0
D(109)	0	0	0	0	0	0	0	0.000183	0	0.000349	0	0.000317	0.000563	9.3e-05	0.00027	0.000161	0.000346	0
I(488)	0	0	0.000349	0	0	0.000657	0	0	0	0	0	0.000211	0	0	6.7e-05	0.00091	0	0
C(12)	0	0	0	0	0	0	0.000433	0.000549	0	0	0.00038	0.000106	0.000281	9.3e-05	0.000202	0	0.001038	0
D(161)	0	0	0.001048	0.000202	0.000274	0.000986	0	0	0	0	0	0	0.000211	9.3e-05	6.7e-05	0.000428	0.000173	0
T(644)	0	0	0.000699	0.000202	0	0	0	0	0.000377	0	0.00038	0.000211	7e-05	0.000186	0.000472	0.000214	0	0
V(667)	0.001325	0	0	0	0	0	0	0	0	0	0	0.000952	0	0.000837	0.000202	0	0	0
D(736)	0.005298	0.001189	0	0	0	0	0.000217	0	0	0	0	0.000317	0.000281	0.000279	0.000135	0.000107	0.000346	0
Y(521)	0	0	0	0	0	0	0	0	0	0	0	0	0	0.000558	0.000337	0.000428	0.000519	0
A(43)	0	0	0.000349	0	0	0	0.000217	0	0	0	0.00019	0	7e-05	9.3e-05	0.000135	0.000642	0.000346	0
A(554)	0	0	0	0	0	0	0	0	0.000377	0	0.000569	0.000634	0.000141	0	6.7e-05	0.000161	0.000865	0
A(2)	0	0	0	0	0.000274	0.000657	0.000217	0	0.000377	0.001046	0	0	0	0.000465	0.000404	0.000107	0	0
K(718)	0	0	0	0.000202	0	0.000986	0	0.000366	0	0	0	0.000106	0.000211	9.3e-05	6.7e-05	0.000321	0.000346	0
M(380)	0	0	0	0	0.001096	0.001643	0.000217	0	0.000377	0.000697	0.00019	0.000106	0.000141	0	6.7e-05	0.000107	0	0
R(721)	0	0	0	0	0.000274	0.000329	0	0	0	0	0	0.000106	0.000211	0.001023	0	0.000161	0	0
Q(357)	0	0	0	0	0	0	0	0	0	0	0	0	0	0.000279	0.000741	0.000268	0.000173	0
V(588)	0	0	0.000349	0.000202	0.000274	0	0	0	0	0	0.00019	0.000106	0.000281	9.3e-05	0.000539	0.000107	0	0
I(450)	0	0	0	0	0	0.000657	0	0	0	0	0	0.000317	0.000492	0.000465	0.000135	5.4e-05	0	0
G(774)	0	0.001189	0.002096	0.000809	0.000548	0.000329	0	0	0	0	0	0.000106	0	0	0.000202	5.4e-05	0	0
R(651)	0	0	0	0	0	0	0	0	0	0	0	0.000106	0.000352	0.000372	0.000607	0	0	0
P(378)	0	0.001189	0	0	0.001643	0.003943	0	0	0	0	0	0	0	0	0	0	0	0
A(250)	0	0	0.000349	0.000404	0	0	0	0.000183	0	0	0.00019	0.000106	0.000211	0.000372	0	0.000107	0.000692	0
I(536)	0	0	0	0.000404	0.000822	0.000329	0	0	0.000377	0	0	0	0.000211	0	6.7e-05	5.4e-05	0.001211	0
N(734)	0	0	0	0	0	0.000657	0	0	0.001507	0.000349	0.00019	0	7e-05	9.3e-05	0.000135	0.000268	0.000346	0
L(636)	0	0	0	0	0.000822	0.000329	0.000217	0.000183	0	0.000349	0.00019	0.000423	7e-05	0.000186	0.000135	5.4e-05	0	0
L(212)	0.001325	0	0.000349	0.000606	0.001917	0	0	0	0.000377	0	0	0	7e-05	0	6.7e-05	0.000107	0.000173	0
T(148)	0	0	0	0	0	0.000329	0	0	0	0.000349	0	0.000317	0.000281	0	0.000135	0.000161	0.000692	0
A(4)	0	0	0	0	0	0	0	0	0	0.001743	0	0.000211	0	0.000372	0.000404	0	0.000173	0
N(491)	0	0	0.000349	0	0	0.000329	0	0	0	0	0.00038	0.000634	0.000211	0.000186	0.000202	0	0	0
T(51)	0	0	0	0	0.000274	0	0	0	0.002261	0.001395	0	0.000211	7e-05	9.3e-05	0.000202	0	0	0
P(830)	0	0	0	0	0	0	0	0.000183	0	0.000697	0.00019	0.000106	0.000141	9.3e-05	0.000472	5.4e-05	0.000346	0
T(76)	0	0	0.000349	0.000202	0.000274	0	0	0.000183	0.000377	0.000697	0.00038	0	0.000141	0.000279	0.00027	0	0	0
L(90)	0	0	0	0	0	0	0	0	0	0	0.00019	0	0.000703	0.000186	6.7e-05	0.000161	0	0
Q(444)	0	0	0	0	0	0.000986	0	0.000183	0	0.000697	0.00038	0.000106	0.000281	9.3e-05	0.000135	5.4e-05	0	0
D(60)	0	0	0	0.000404	0.000548	0.000986	0	0	0	0.001046	0	0	0.000141	0	0.00027	0	0.000173	0
F(415)	0	0.01308	0.002096	0	0	0	0	0	0	0	0	0	0	0	0	0	0	0
A(406)	0.001325	0	0	0	0	0	0	0	0.000754	0.000697	0	0.000317	0.000281	0.000186	0	0.000107	0.000173	0
C(813)	0	0	0	0	0	0	0	0	0	0	0	0.000211	0	0.001302	0	0	0	0
L(805)	0	0	0	0	0.000274	0.001643	0	0	0	0	0.00019	0.000423	0.000141	0.000186	0	5.4e-05	0	0
L(247)	0	0	0	0.000606	0	0	0.000433	0.000183	0.000754	0.001395	0.00038	0.000106	0	0	6.7e-05	0	0	0
I(223)	0	0	0.000349	0	0	0.002958	0.000867	0	0.000377	0	0	0	0	0	6.7e-05	0	0	0
D(170)	0	0	0	0	0	0	0	0	0.000377	0.000349	0.00038	0.000211	0.000141	0	0	0.000375	0.000173	0
R(285)	0	0	0	0	0	0	0	0	0	0	0.00038	0.000106	0.000141	0	0.000404	0.000268	0	0
I(847)	0	0	0	0	0.000274	0	0	0	0.000377	0	0	0.000211	0.000211	0.000279	0.00027	0	0.000173	0
G(44)	0.001325	0	0.000349	0	0	0	0	0	0	0.000349	0	0.000211	0.000141	0.000558	6.7e-05	5.4e-05	0	0
Q(875)	0	0	0	0	0	0	0.000217	0.000366	0	0	0.000759	0.000106	0.000281	0	0	5.4e-05	0.000346	0
L(302)	0	0	0.000349	0	0	0	0	0	0	0.000349	0.000569	0.000317	0.000211	0.000186	0.000135	0	0	0
I(171)	0	0	0	0	0	0	0	0	0	0	0	0	0.000211	9.3e-05	0.000607	5.4e-05	0.000173	0
L(869)	0	0.001189	0	0	0.000274	0.000657	0	0	0	0	0.00019	0.000211	7e-05	0.000186	0	0.000214	0	0
V(315)	0	0	0	0	0	0	0	0.000549	0	0	0.00019	0	7e-05	0	0	0.000268	0.000692	0
V(338)	0	0	0	0.000202	0	0.000329	0	0	0	0	0	0	0.000211	0.000651	6.7e-05	5.4e-05	0	0
K(263)	0	0	0	0	0	0	0.000867	0	0	0	0	0.000423	7e-05	0	6.7e-05	0.000161	0.000173	0
R(197)	0	0	0	0.000404	0.000274	0	0	0.000183	0	0	0	0.000423	0.000211	9.3e-05	0	0.000107	0	0
T(402)	0	0	0.000699	0.000606	0	0	0.000217	0.000549	0	0	0	0	0.000141	0.000186	6.7e-05	0	0	0
A(797)	0	0	0	0	0	0	0	0	0	0	0	0.000106	0	0	0	0.000642	0.000173	0
S(434)	0	0	0	0	0	0.000329	0	0.000183	0.000754	0	0.00038	0	7e-05	0	0.000337	5.4e-05	0.000173	0
L(186)	0	0	0	0	0	0	0	0	0	0	0	0.00074	0.000492	0	0	0	0	0
C(464)	0	0	0	0	0.000274	0.000329	0	0.000183	0	0.000349	0.00038	0.000211	7e-05	9.3e-05	0	0.000107	0.000346	0
T(246)	0	0	0	0	0	0	0.000867	0	0	0	0.00038	0.000106	0.000422	0	6.7e-05	0	0	0
S(325)	0	0	0	0.000202	0	0	0	0	0	0	0.00019	0.000211	0.000211	0	0.000202	0.000107	0.000173	0
P(21)	0	0	0	0.000404	0.000274	0	0	0	0.000377	0.000349	0	0.000106	0.000211	9.3e-05	0.000202	0	0	0
K(103)	0	0	0	0	0.000274	0	0.000217	0	0	0	0	0.000317	0.000422	9.3e-05	6.7e-05	0	0	0
D(164)	0	0	0	0	0	0	0	0	0	0	0.00019	0	7e-05	0.000279	0.000337	0.000161	0	0
E(919)	0	0.001189	0	0	0	0	0	0.000183	0	0	0.00019	0.000211	7e-05	0.000186	0.000135	0.000107	0	0
T(226)	0	0	0	0	0	0	0	0	0	0	0	0.000106	7e-05	0.000465	0.000202	0.000107	0	0
D(523)	0	0	0.000349	0	0	0.000986	0.000433	0	0.000377	0	0	0	0.000141	0	0.000135	5.4e-05	0	0
M(818)	0	0	0	0	0	0.000657	0.000217	0	0	0	0	0.000106	7e-05	0.000279	0.000135	5.4e-05	0.000173	0
K(143)	0	0	0	0	0	0	0	0	0	0	0	0.000106	0	0.000186	0.000539	5.4e-05	0	0
H(355)	0	0	0	0	0	0	0	0.000183	0	0	0	0	7e-05	0.000558	0.00027	0	0	0
I(632)	0	0	0	0	0	0	0	0	0	0	0	0.000106	0	9.3e-05	0.000135	0.000107	0.001038	0
L(514)	0	0	0.000349	0	0	0	0	0.000183	0	0	0	0.000211	0.000211	9.3e-05	6.7e-05	0.000107	0.000173	0
D(454)	0	0	0	0	0	0	0	0	0	0.000349	0.00019	0	0	0	0	0.000428	0.000346	0
H(256)	0	0	0	0.000404	0	0.000986	0	0	0	0	0.00019	0	0.000141	0	0	0.000161	0.000173	0
L(630)	0	0	0	0.000202	0.000548	0	0.000217	0.000183	0.000377	0	0	0.000106	7e-05	0.000186	6.7e-05	5.4e-05	0	0
S(778)	0	0	0	0	0	0	0.000217	0.000549	0	0	0.00019	0.000634	0	0	0	0	0	0
H(892)	0	0.001189	0	0	0	0	0	0.000366	0.001507	0	0.00019	0	7e-05	0	6.7e-05	5.4e-05	0	0
V(637)	0	0	0.000699	0	0	0	0.000217	0	0	0.000697	0	0	0.000141	9.3e-05	0	0.000161	0	0
V(792)	0	0	0	0	0	0	0	0	0	0.002092	0	0.000211	0	0.000279	0	0	0	0
V(42)	0	0.001189	0.002794	0	0	0	0	0	0	0	0	0	0	0	6.7e-05	5.4e-05	0	0
I(562)	0	0	0	0.000202	0.002191	0	0	0	0	0	0	0.000106	0	0	0	0	0.000173	0
F(192)	0	0	0	0	0	0	0	0	0	0	0	0.000317	0.000352	0.000279	0	0	0	0
N(403)	0.001325	0	0	0	0	0	0	0	0.000377	0	0.00019	0.000106	7e-05	0.000465	6.7e-05	0	0	0
N(300)	0	0	0.000349	0	0	0.000329	0.000217	0	0	0	0.00019	0.000634	7e-05	0	0	0	0	0
T(252)	0	0	0	0	0.000822	0	0	0.000183	0	0.000349	0	0	7e-05	0.000372	6.7e-05	0	0	0
A(878)	0	0	0	0.000202	0	0	0	0	0.000377	0.000349	0	0.000211	0	9.3e-05	0	0.000161	0.000173	0
V(190)	0	0	0	0	0	0	0	0	0	0	0	0.000106	7e-05	0.000279	0	0.000107	0.000519	0
Y(346)	0	0	0	0	0	0.000329	0	0	0	0	0	0	0.000141	9.3e-05	0.000202	0	0.000519	0
A(699)	0	0	0	0	0	0.000986	0	0	0	0	0	0	7e-05	0.000186	6.7e-05	0.000161	0	0
E(278)	0	0	0.000699	0.000809	0.000274	0	0	0	0	0	0	0	0	9.3e-05	0.000135	0	0	0
N(356)	0	0	0	0	0	0	0	0	0	0	0	0	0	0	0.000674	0	0	0
P(412)	0	0	0.000349	0	0	0	0	0	0.000377	0	0	0	0	0	0.000202	0.000214	0.000173	0
E(876)	0	0	0	0	0	0	0	0	0.000377	0	0.00038	0	0.000141	0.000186	0.000202	0	0	0
V(353)	0	0	0	0	0	0	0	0	0	0	0	0	7e-05	0.000186	6.7e-05	0.000107	0.000519	0
C(697)	0.001325	0	0	0	0	0	0.000433	0	0.000377	0	0	0	7e-05	0.000186	0.000135	0	0	0
H(599)	0	0	0	0	0	0.000657	0	0	0	0	0	0.000106	0.000422	0	0	0	0	0
I(466)	0	0	0	0	0	0	0.000217	0.000183	0	0	0.00019	0.000317	0	0	0.000135	5.4e-05	0	0
D(67)	0	0	0.001746	0.000202	0	0	0	0	0	0	0	0	0.000141	9.3e-05	0	0	0	0
D(194)	0	0	0	0	0	0	0	0.000183	0	0	0.00038	0.000211	0.000281	0	0	0	0	0
D(258)	0	0	0.000349	0.000404	0	0	0	0.000183	0	0.000349	0	0.000423	0	0	0	0	0	0
Y(719)	0	0	0	0.000202	0.000274	0	0	0.000183	0	0	0	0	7e-05	0	0.00027	0	0.000173	0
V(763)	0	0	0.000349	0	0	0	0	0	0	0	0	0	7e-05	9.3e-05	0	5.4e-05	0.000865	0
K(780)	0	0	0	0.000202	0	0	0	0	0.000754	0	0	0.000211	7e-05	0	6.7e-05	0.000107	0	0
N(874)	0	0	0.000349	0	0	0	0	0	0.000377	0	0.00019	0	0	0	0.000135	0.000214	0	0
H(82)	0.001325	0	0	0.000202	0.000274	0	0	0	0	0	0.00038	0	0	0.000186	6.7e-05	5.4e-05	0	0
R(181)	0	0	0	0	0	0	0.000217	0	0	0	0	0.000317	0.000211	0.000186	0	0	0	0
G(25)	0	0	0	0	0	0	0.000217	0	0	0	0	0	0	0.000558	6.7e-05	5.4e-05	0	0
N(743)	0	0	0.000349	0	0	0	0	0	0	0	0.00019	0.000317	0	0.000279	0	5.4e-05	0	0
R(279)	0	0	0.000349	0	0.000548	0.000329	0	0.000183	0	0.000349	0	0	7e-05	0	0.000135	0	0	0
V(233)	0	0	0	0	0	0.000329	0	0	0	0	0	0.000106	7e-05	0	0.00027	5.4e-05	0	0
I(201)	0	0	0	0.000202	0	0	0.000217	0.000183	0	0	0	0.000211	7e-05	0.000186	0	0	0	0
E(796)	0	0	0	0	0	0.000329	0.000867	0	0	0	0	0.000106	0	0.000186	0	0	0	0
V(320)	0	0	0	0	0	0	0	0	0	0	0	0.000529	0	0	0.000135	0	0.000173	0
V(424)	0	0	0	0	0	0	0	0	0.000754	0	0	0	7e-05	0.000279	6.7e-05	5.4e-05	0	0
T(262)	0	0	0	0	0	0	0	0	0	0	0	0.000106	0.000141	0.000186	0	0.000161	0	0
S(68)	0	0	0	0.000202	0	0	0.000217	0	0	0.000349	0.00019	0.000106	0	0	0.000135	5.4e-05	0	0
A(660)	0	0.001189	0	0	0	0	0.000433	0	0	0	0	0	0.000211	0	0	0	0.000346	0
Q(184)	0	0	0	0	0	0	0	0	0.000377	0	0.00038	0.000106	0.000211	9.3e-05	0	0	0	0
L(648)	0	0	0	0	0	0	0	0	0	0	0	0.000106	0.000422	9.3e-05	0	0	0	0
D(154)	0	0	0	0	0	0	0	0	0	0	0	0	0.000281	0.000186	0.000135	0	0	0
V(111)	0	0	0	0.000202	0	0	0	0.000183	0.000377	0	0.00019	0	0	9.3e-05	0	0.000161	0	0
F(471)	0	0	0	0	0	0	0	0	0	0	0	0	7e-05	0	6.7e-05	0.000321	0	0
T(259)	0	0	0	0	0	0	0	0	0.000754	0	0	0.000211	0.000141	0	6.7e-05	5.4e-05	0	0
E(61)	0	0	0	0	0	0	0	0	0.000377	0	0	0	0	9.3e-05	0.000337	5.4e-05	0	0
D(740)	0	0	0	0	0	0.000329	0	0.000183	0	0	0	0.000211	0.000141	9.3e-05	6.7e-05	0	0	0
V(742)	0	0	0	0	0	0	0	0	0	0	0	0.000423	0.000141	0	0	0.000107	0	0
V(373)	0	0	0	0	0.000274	0	0	0	0	0	0	0	0.000211	0	0.000202	0	0.000173	0
N(911)	0	0	0	0	0	0	0	0	0.000377	0	0.00019	0	0.000211	9.3e-05	6.7e-05	5.4e-05	0	0
R(726)	0	0	0	0	0	0	0	0	0	0	0	0	0	0	6.7e-05	0.000375	0	0
S(364)	0	0	0	0	0	0	0	0	0	0.000349	0	0.000106	0.000352	9.3e-05	0	0	0	0
V(174)	0	0	0	0	0	0	0	0	0	0.000349	0	0	0.000211	0	0	0.000161	0	0
N(138)	0	0	0	0	0	0.000329	0	0	0	0	0	0.000106	7e-05	0.000186	6.7e-05	5.4e-05	0	0
N(600)	0	0	0	0	0	0.000329	0	0.000183	0	0	0.00019	0.000106	0	0	0.000202	0	0	0
P(927)	0	0	0	0	0.000274	0	0	0	0	0	0	0.000106	7e-05	0	0.000135	5.4e-05	0.000173	0
E(729)	0	0	0	0	0	0	0	0.000183	0	0.000349	0.000759	0	0	0	6.7e-05	0	0	0
N(177)	0.002649	0	0	0	0	0	0	0	0	0	0	0.000106	0.000211	9.3e-05	0	0	0	0
E(144)	0	0	0	0	0.000274	0	0.000433	0	0	0	0	0	0.000211	0	0	5.4e-05	0	0
R(735)	0	0	0	0	0	0	0	0.001097	0	0	0	0	0	0	6.7e-05	0	0	0
T(926)	0	0	0	0	0	0.000329	0.000217	0	0	0	0	0	0	9.3e-05	0.000135	5.4e-05	0.000173	0
F(326)	0	0	0	0	0	0	0	0	0.001507	0.000349	0	0	7e-05	0	6.7e-05	0	0	0
S(520)	0	0	0.000349	0	0	0	0	0	0	0	0	0	7e-05	9.3e-05	0.000135	5.4e-05	0.000173	0
V(335)	0	0.001189	0	0.000202	0	0	0	0	0	0	0	0	7e-05	0	0	0.000214	0	0
S(649)	0	0	0	0	0.000548	0.000329	0.000217	0	0.000377	0.000697	0	0	0	0	0	0	0	0
I(66)	0	0	0	0	0	0	0	0	0	0	0	0.000529	0	9.3e-05	6.7e-05	0	0	0
V(700)	0	0	0.000349	0	0	0	0	0	0	0	0	0.000211	0.000211	0	6.7e-05	0	0	0
M(633)	0	0.001189	0	0	0.000274	0	0	0	0	0	0	0	0	0	6.7e-05	0.000107	0.000346	0
N(198)	0	0.001189	0	0	0	0	0.000217	0	0	0	0	0.000106	7e-05	0	0.000135	0	0.000173	0
K(267)	0	0	0	0	0	0	0	0	0	0.000697	0	0.000211	7e-05	9.3e-05	6.7e-05	0	0	0
V(398)	0	0	0	0	0	0.000986	0	0	0	0	0	0.000317	7e-05	0	0	0	0	0
T(591)	0	0	0	0	0	0	0	0	0.000377	0	0.00019	0.000106	7e-05	0	0	0.000107	0.000173	0
Y(606)	0	0.001189	0	0	0	0	0	0	0	0	0	0	0.000141	9.3e-05	6.7e-05	0.000107	0	0
T(769)	0	0	0	0	0	0	0	0	0	0.000349	0.00019	0	0	0	0.000337	0	0	0
M(899)	0	0	0	0	0	0	0	0	0	0	0	0.000211	0	0.000279	6.7e-05	5.4e-05	0	0
A(706)	0	0	0	0	0	0	0	0	0.000754	0	0	0.000106	0	0	0.000135	0.000107	0	0
D(135)	0	0	0	0	0	0	0	0	0	0	0	0.000106	7e-05	0	0.00027	5.4e-05	0	0
N(215)	0	0	0	0	0	0	0	0	0	0	0.00019	0	0	0	0	0.000107	0.000692	0
L(544)	0	0	0	0	0	0	0	0	0	0	0	0.00074	0	0	0	0	0	0
H(362)	0	0	0	0	0	0	0	0	0	0	0	0.000106	0.000141	0	0.000202	5.4e-05	0	0
S(115)	0	0	0	0	0	0	0	0	0	0.000697	0.000569	0	0	0	6.7e-05	0	0	0
P(112)	0	0	0	0	0	0	0	0	0	0	0	0.000106	0.000141	9.3e-05	6.7e-05	5.4e-05	0	0
A(625)	0	0	0	0	0	0	0	0.000183	0	0	0	0	0	0	6.7e-05	0.000161	0.000173	0
P(873)	0	0	0	0	0	0.000657	0.000867	0	0	0	0	0	0	0	0	0	0	0
A(46)	0	0	0	0	0	0.000657	0.000433	0	0	0	0	0	7e-05	9.3e-05	0	0	0	0
A(581)	0	0	0	0	0	0	0	0.000183	0	0.000697	0	0.000106	7e-05	0	6.7e-05	0	0	0
H(882)	0	0	0.000699	0	0	0.000329	0	0	0.000377	0	0.00019	0	7e-05	0	0	0	0	0
V(72)	0	0	0	0	0	0	0	0	0	0	0	0.000211	0.000211	0	6.7e-05	0	0	0
M(924)	0	0	0	0	0	0	0	0	0	0	0	0	0	0	6.7e-05	0.000161	0.000346	0
M(566)	0	0	0	0	0	0	0	0.000183	0	0	0	0	7e-05	0	6.7e-05	0.000107	0.000173	0
I(579)	0	0	0	0.000202	0	0	0	0	0	0.000349	0	0.000423	0	0	0	0	0	0
N(64)	0	0	0.001048	0	0	0	0	0	0.000754	0	0	0	0	0	0	0	0.000173	0
A(547)	0	0	0	0	0	0	0	0	0	0	0	0	0.000211	0	0	0.000107	0.000173	0
Q(117)	0	0	0	0	0	0	0	0	0	0	0	0.000317	7e-05	0	6.7e-05	5.4e-05	0	0
Y(458)	0	0	0	0	0	0	0	0	0	0	0	0	0	9.3e-05	0.00027	5.4e-05	0	0
Y(289)	0	0	0	0	0	0	0	0	0	0	0.00019	0.000317	0	0	6.7e-05	0	0.000173	0
P(232)	0	0	0	0	0	0.000329	0	0	0	0	0	0	7e-05	0.000372	0	0	0	0
D(260)	0	0	0	0	0.000274	0	0	0	0	0	0	0.000211	0	9.3e-05	6.7e-05	5.4e-05	0	0
F(222)	0	0	0.000349	0	0	0	0	0.000183	0	0	0	0.000317	0	0	0	5.4e-05	0	0
Q(191)	0	0	0	0	0	0	0	0	0	0.000349	0	0.000106	0.000211	9.3e-05	0	0	0	0
L(187)	0	0	0	0	0	0	0	0	0	0	0	0.000211	0.000211	0	0	0	0.000173	0
D(358)	0	0.001189	0	0.000404	0.000274	0	0	0	0	0	0	0	0	9.3e-05	6.7e-05	0	0	0
Y(826)	0	0	0	0	0	0	0	0	0	0.000349	0	0	0	0	0.000202	0.000107	0	0
W(162)	0	0	0	0	0	0	0	0.000183	0	0	0	0.000106	0	0	0	0.000161	0.000173	0
A(777)	0	0	0.000349	0	0	0	0	0	0	0	0	0	0	0	0.000337	0	0	0
I(145)	0	0	0.000349	0	0	0.001314	0	0	0	0	0	0	0	0	0	0	0.000173	0
L(707)	0	0	0	0	0	0	0	0	0	0	0.00019	0.000106	0	0	0.000135	0.000107	0	0
P(328)	0	0.001189	0	0	0	0	0	0.000183	0	0.000349	0	0	0	0.000279	0	0	0	0
V(128)	0	0	0	0	0	0.000657	0	0	0	0.000349	0	0	0	0	6.7e-05	0	0.000346	0
M(855)	0	0	0.001746	0	0	0	0	0	0	0	0	0	7e-05	0	0	0	0	0
R(349)	0	0	0	0.000202	0	0	0	0	0	0	0	0	0	0	0.000202	5.4e-05	0	0
H(295)	0	0	0	0.000202	0	0	0.000217	0	0	0	0	0.000106	0	0	6.7e-05	5.4e-05	0	0
T(24)	0	0	0	0	0	0.000657	0	0	0	0	0	0	0	0	0.000135	5.4e-05	0	0
D(304)	0	0	0.000349	0	0	0.000329	0	0	0	0	0	0	7e-05	0.000186	0	0	0	0
H(572)	0	0	0	0.000202	0	0	0	0	0	0	0	0	0.000141	0	0	0.000107	0	0
Q(5)	0	0	0	0	0.000274	0	0	0	0	0	0.00019	0	0	0	0.000202	0	0	0
L(270)	0	0	0	0	0	0	0	0	0	0	0.00019	0	0	9.3e-05	0	0.000107	0.000173	0
T(586)	0	0	0	0	0	0	0	0	0	0.000349	0.000569	0.000106	0	0	0	0	0	0
E(370)	0	0	0	0.000404	0.000548	0	0	0	0	0	0	0	0	0	0	0	0.000173	0
I(266)	0	0	0	0	0	0	0	0	0	0	0.00019	0	0	0	0.000202	5.4e-05	0	0
D(477)	0	0	0	0	0	0	0	0	0	0	0	0	0	0	6.7e-05	0	0.000692	0
D(421)	0	0	0	0	0	0	0	0	0	0	0.00019	0	7e-05	0	0.000135	0	0.000173	0
S(549)	0	0	0	0	0	0	0	0.000183	0	0	0.00038	0	0.000141	0	0	0	0	0
T(225)	0	0	0	0	0	0	0	0	0.000377	0.000349	0	0	0	0	6.7e-05	5.4e-05	0.000173	0
Y(122)	0	0	0	0.000404	0	0.000657	0	0	0	0	0	0	0	0	0	5.4e-05	0	0
R(533)	0	0	0	0	0	0	0	0	0	0	0.00019	0.000106	0.000211	0	0	0	0	0
E(436)	0	0	0.000349	0	0	0	0	0	0	0	0	0	0	9.3e-05	0.000202	0	0	0
V(166)	0	0	0	0	0	0	0	0	0	0.000349	0	0	0	0.000279	6.7e-05	0	0	0
Y(156)	0	0	0.000699	0.000202	0	0	0	0	0	0	0	0	0	0.000186	0	0	0	0
D(155)	0	0	0	0	0	0	0	0	0.000377	0.000697	0	0.000106	0	0	0	5.4e-05	0	0
Y(149)	0	0	0	0.000202	0	0.000329	0	0	0	0	0.00038	0	0	9.3e-05	0	0	0	0
V(147)	0	0	0	0.000202	0	0	0	0	0	0	0.00019	0	0	9.3e-05	0	0.000107	0	0
N(489)	0	0	0	0	0	0	0	0	0	0	0	0	0.000141	9.3e-05	6.7e-05	5.4e-05	0	0
C(482)	0	0	0	0	0	0	0	0	0	0	0	0	7e-05	0.000279	6.7e-05	0	0	0
V(472)	0	0	0	0	0	0	0	0	0	0	0	0	7e-05	9.3e-05	6.7e-05	5.4e-05	0.000173	0
V(476)	0	0	0	0	0	0	0	0	0	0	0	0.000106	0	0	0	0.000161	0.000173	0
D(481)	0	0	0	0	0.000274	0	0	0	0	0	0	0.000106	0.000211	0	0	0	0	0
A(253)	0	0.002378	0.000349	0	0	0	0	0	0	0	0	0	0	0	0	5.4e-05	0.000173	0
Q(932)	0.001325	0	0	0	0	0.000329	0	0	0	0	0.00019	0	0.000141	0	0	0	0	0
T(710)	0	0	0	0	0	0	0	0	0	0	0	0	7e-05	0	0	0.000214	0	0
H(928)	0	0	0	0	0	0	0.000217	0	0	0	0.00038	0	0	0.000186	0	0	0	0
K(603)	0	0	0	0	0	0	0.000217	0	0	0	0	0	0	9.3e-05	0.000202	0	0	0
W(916)	0.002649	0	0	0	0	0	0	0	0	0	0	0	7e-05	9.3e-05	6.7e-05	0	0	0
D(833)	0	0	0	0	0	0	0	0	0	0.000697	0	0	0	0.000186	0	5.4e-05	0	0
G(670)	0	0	0	0	0.000548	0	0.000433	0	0	0	0	0	0	0	6.7e-05	0	0	0
R(889)	0	0	0.000349	0	0	0	0	0	0	0	0	0	7e-05	0	0.000135	5.4e-05	0	0
S(592)	0	0	0	0	0	0	0	0	0	0	0	0.000106	7e-05	0	0.000135	0	0	0
M(242)	0	0	0	0	0	0	0	0	0	0	0	0	0	0.000372	0	0	0	0
S(768)	0	0	0	0	0	0.000329	0	0	0	0	0	0.000106	0	9.3e-05	0	0	0.000173	0
K(281)	0	0	0	0	0	0	0.000433	0	0	0	0	0.000106	0	9.3e-05	0	0	0	0
L(282)	0	0	0	0	0	0	0	0	0	0	0	0.000317	0	0	6.7e-05	0	0	0
G(712)	0	0	0	0	0	0	0	0	0.000377	0	0	0	0.000141	0	6.7e-05	0	0	0
T(393)	0	0	0	0	0	0	0	0	0	0	0	0	0	0	0.000202	5.4e-05	0	0
V(341)	0	0	0	0	0	0	0	0	0	0	0.00019	0	0	0	6.7e-05	5.4e-05	0.000173	0
G(385)	0	0	0	0	0	0	0	0	0	0	0	0	0	0.000186	6.7e-05	5.4e-05	0	0
V(234)	0	0	0.000349	0	0	0	0	0	0	0	0	0.000106	7e-05	9.3e-05	0	0	0	0
N(404)	0	0	0.000699	0	0	0	0	0	0	0	0	0	0	0	0.000135	0	0	0
K(430)	0	0	0	0	0	0	0	0	0.000377	0	0.00019	0	0	0.000186	0	0	0	0
H(439)	0	0	0	0	0	0	0	0	0	0	0.00019	0	0	9.3e-05	6.7e-05	5.4e-05	0	0
V(495)	0	0	0	0	0	0	0.000217	0	0	0	0	0	0	0	6.7e-05	0.000107	0	0
N(496)	0	0	0	0	0	0	0.000433	0	0	0	0	0	0	9.3e-05	6.7e-05	0	0	0
S(239)	0	0	0	0	0	0	0	0	0	0	0.00019	0	0.000141	9.3e-05	0	0	0	0
F(812)	0	0	0	0	0	0	0	0	0	0	0	0	0	0.000279	6.7e-05	0	0	0
A(199)	0	0	0	0	0	0	0	0	0	0	0	0	7e-05	0.000186	0	5.4e-05	0	0
A(195)	0	0	0	0	0	0	0	0	0	0.000349	0	0.000211	0	0	0	5.4e-05	0	0
D(3)	0	0	0	0	0.000548	0	0	0	0	0	0	0	0	0	6.7e-05	0	0.000173	0
V(11)	0	0	0	0	0	0	0	0	0.000377	0	0	0.000106	0	0	6.7e-05	5.4e-05	0	0
E(917)	0	0	0.000349	0	0	0	0	0	0	0	0	0	7e-05	9.3e-05	6.7e-05	0	0	0
Y(32)	0	0	0	0	0	0	0	0	0	0	0.00019	0	0	0	0.000202	0	0	0
T(896)	0	0	0	0	0	0	0	0.000183	0	0	0	0	7e-05	9.3e-05	0	5.4e-05	0	0
E(894)	0	0	0	0	0	0	0	0	0	0	0	0	0	9.3e-05	0.000135	5.4e-05	0	0
Y(69)	0	0	0	0	0	0	0	0	0	0	0	0	7e-05	0	0	0.000161	0	0
H(75)	0	0	0	0	0	0	0	0	0	0	0	0	0	9.3e-05	0	0.000161	0	0
Q(81)	0	0	0	0	0	0	0	0	0	0.000349	0	0	0	9.3e-05	6.7e-05	5.4e-05	0	0
E(84)	0	0	0	0	0	0	0	0	0	0.001046	0	0	0	0	6.7e-05	0	0	0
V(96)	0	0	0	0	0.000274	0	0	0	0	0	0.00019	0	0	0	6.7e-05	0	0.000173	0
T(120)	0	0	0.000349	0	0	0	0	0	0	0	0	0	0	0	0.000135	5.4e-05	0	0
L(127)	0	0	0	0	0	0.000329	0	0	0	0	0	0.000317	0	0	0	0	0	0
H(816)	0	0	0	0	0	0.000329	0	0	0	0	0	0	7e-05	0	6.7e-05	5.4e-05	0	0
L(527)	0	0	0	0	0	0	0	0	0	0.000349	0	0.000106	7e-05	0	0	5.4e-05	0	0
D(517)	0	0	0	0	0	0	0.000433	0	0.000377	0	0	0	0	0	6.7e-05	0	0	0
S(1)	0	0	0	0	0	0	0	0	0	0.000349	0	0	7e-05	0	6.7e-05	5.4e-05	0	0
T(582)	0	0	0	0	0	0	0	0	0	0	0.00019	0	7e-05	0	0	0.000107	0	0
D(804)	0	0	0	0.000404	0	0	0	0	0	0	0.00019	0	0	0	0	0	0	0
A(550)	0	0	0	0	0.000274	0	0	0	0	0	0	0	0	0	0.000135	0	0	0
G(352)	0	0	0	0	0	0	0	0	0	0	0	0	0	0	0.000135	0	0.000173	0
I(114)	0.001325	0.001189	0	0.000202	0	0	0	0	0	0	0	0	0	0	0	0	0	0
A(125)	0	0	0	0	0	0.000329	0	0	0	0	0	0	0	0.000186	0	0	0	0
A(130)	0	0	0	0	0	0.000329	0	0	0	0	0	0	7e-05	0	6.7e-05	0	0	0
E(350)	0	0	0	0	0	0	0	0	0	0	0	0	0	0	6.7e-05	0.000107	0	0
T(850)	0	0	0	0	0	0	0	0	0	0	0.00019	0.000211	0	0	0	0	0	0
H(347)	0	0	0	0	0	0	0	0	0	0	0	0	7e-05	0	0.000135	0	0	0
D(846)	0	0	0	0	0	0	0	0.000366	0	0.000349	0	0	0	0	0	0	0	0
L(146)	0	0	0	0	0	0	0	0	0	0	0	0	0	0	0	0.000161	0	0
F(340)	0	0	0	0	0	0	0	0	0	0.000349	0	0	0	0	0.000135	0	0	0
F(157)	0	0	0	0	0	0	0	0	0	0	0	0.000106	7e-05	0	0	0	0.000173	0
P(834)	0	0	0	0	0	0	0	0.000366	0.000377	0	0	0	0	0	0	0	0	0
V(704)	0	0	0	0	0	0	0	0	0	0	0	0	7e-05	9.3e-05	0	5.4e-05	0	0
Y(828)	0	0	0	0	0	0	0	0	0	0	0	0	0	9.3e-05	0	0.000107	0	0
N(713)	0	0	0	0	0	0	0	0	0	0	0	0	0	9.3e-05	0.000135	0	0	0
I(494)	0	0	0	0	0	0	0	0	0	0	0.00019	0.000106	0	0	6.7e-05	0	0	0
E(802)	0	0	0	0	0.000822	0	0	0	0	0	0	0	0	0	0	0	0	0
N(722)	0	0	0	0	0	0	0	0	0	0	0	0.000211	0	0	0	5.4e-05	0	0
Q(224)	0	0	0	0	0	0.000329	0	0	0	0.000349	0	0	0	0	6.7e-05	0	0	0
F(782)	0	0	0	0	0	0	0	0	0	0	0	0	0	0.000186	6.7e-05	0	0	0
L(469)	0	0	0	0.000606	0	0	0	0	0	0	0	0	0	0	0	0	0	0
L(723)	0	0	0	0	0	0	0	0	0	0	0	0	0	0	0	0	0.000519	0
D(484)	0	0	0	0	0	0	0	0	0	0	0.00038	0	0	0	6.7e-05	0	0	0
D(608)	0	0	0	0	0	0	0	0	0	0	0.00038	0	7e-05	0	0	0	0	0
L(245)	0	0	0	0	0	0	0	0	0	0	0	0.000211	0	9.3e-05	0	0	0	0
Q(292)	0	0	0	0	0	0	0	0	0	0	0	0	0.000141	0	6.7e-05	0	0	0
I(106)	0	0	0	0	0	0	0	0	0	0	0	0.000317	0	0	0	0	0	0
I(856)	0	0	0	0	0	0.000329	0	0	0	0.000349	0	0	0	0	0	5.4e-05	0	0
Y(877)	0	0	0	0	0	0	0	0.000183	0	0	0	0.000106	0	0	0	5.4e-05	0	0
Q(57)	0	0	0	0	0.000274	0.000329	0	0	0	0	0	0	0	0	0	5.4e-05	0	0
Y(546)	0	0	0	0	0	0.000329	0	0	0	0	0.00019	0	0	0	0	5.4e-05	0	0
V(930)	0	0	0	0	0	0	0	0	0	0	0	0.000211	0	0	6.7e-05	0	0	0
T(929)	0	0	0	0	0	0	0	0.000183	0	0	0.00019	0	0	0	6.7e-05	0	0	0
L(401)	0	0	0	0	0	0	0	0	0	0	0	0	0	0	0.000202	0	0	0
T(912)	0	0	0	0	0.000548	0.000329	0	0	0	0	0	0	0	0	0	0	0	0
M(615)	0	0	0	0	0	0	0	0	0	0	0	0	0	9.3e-05	6.7e-05	5.4e-05	0	0
S(27)	0	0	0	0.000202	0	0	0	0	0	0	0.00019	0.000106	0	0	0	0	0	0
F(35)	0	0	0	0	0	0	0	0	0	0	0	0	0	0	0	0.000107	0.000173	0
D(29)	0	0	0	0	0	0	0	0.000183	0	0.000349	0	0	0	0	6.7e-05	0	0	0
N(611)	0	0	0	0	0	0	0.000217	0	0	0	0	0	7e-05	0	0	5.4e-05	0	0
V(71)	0.001325	0	0	0	0	0	0	0.000183	0	0	0	0	7e-05	0	0	0	0	0
N(360)	0	0	0.000349	0	0	0	0	0	0	0	0.00019	0	7e-05	0	0	0	0	0
Y(87)	0	0	0	0	0	0.000329	0	0	0	0	0	0.000106	0	0	0	5.4e-05	0	0
Y(80)	0	0.002378	0	0	0	0	0	0	0	0	0	0	0	9.3e-05	0	0	0	0
S(451)	0	0	0	0	0	0	0	0	0	0	0	0	0	9.3e-05	6.7e-05	5.4e-05	0	0
L(280)	0	0	0	0	0	0	0	0	0	0	0	0.000317	0	0	0	0	0	0
L(389)	0	0	0	0	0	0	0	0	0	0	0	0.000106	0	0	0	0	0.000173	0
E(277)	0	0	0	0	0	0	0	0	0	0	0	0.000106	0	0	6.7e-05	0	0	0
V(737)	0	0	0	0	0	0	0	0	0	0	0	0	0	9.3e-05	0	5.4e-05	0	0
K(288)	0	0	0	0	0	0	0	0	0	0	0	0	0	0	0	0.000107	0	0
T(344)	0	0	0	0	0	0	0	0	0	0	0	0	0	0	0	5.4e-05	0.000173	0
N(297)	0	0	0	0	0	0	0	0	0	0	0	0	0	0	0	0.000107	0	0
A(558)	0	0	0	0	0	0	0	0	0	0	0	0	0	0	0.000135	0	0	0
L(371)	0	0	0	0	0	0	0	0	0	0	0	0	0	9.3e-05	0	5.4e-05	0	0
K(411)	0	0	0	0	0	0	0	0	0.000754	0	0	0	0	0	0	0	0	0
V(410)	0	0	0	0	0	0	0	0	0	0	0	0	0	9.3e-05	6.7e-05	0	0	0
K(676)	0	0	0	0	0	0	0	0	0	0	0	0.000211	0	0	0	0	0	0
G(678)	0	0	0	0	0.000548	0	0	0	0	0	0	0	0	0	0	0	0	0
I(333)	0	0	0.000349	0	0	0	0	0	0	0	0.00019	0	0	0	0	0	0	0
A(376)	0	0.001189	0	0	0	0	0	0	0	0	0	0	0	9.3e-05	0	0	0	0
I(307)	0	0	0	0	0	0	0	0.000183	0	0	0	0.000106	0	0	0	0	0	0
D(684)	0	0	0.000349	0.000202	0	0	0	0	0	0	0	0	0	0	0	0	0	0
K(391)	0	0	0	0	0	0	0	0.000183	0	0	0	0	0	0	0	5.4e-05	0	0
K(714)	0	0	0	0	0	0	0	0	0	0	0	0	0	0	0	0.000107	0	0
D(336)	0	0.001189	0	0	0	0	0	0	0	0	0	0	0	9.3e-05	0	0	0	0
N(386)	0	0	0.000349	0	0	0	0	0	0	0	0	0	0	0	0	5.4e-05	0	0
R(331)	0	0	0	0	0	0	0	0	0	0	0	0	7e-05	0	6.7e-05	0	0	0
V(359)	0	0	0	0	0	0	0.000217	0	0	0	0	0	0	0	0	5.4e-05	0	0
I(715)	0	0	0	0	0	0	0	0	0	0	0.00019	0	0	0	0	0	0.000173	0
I(548)	0	0	0	0	0	0	0	0	0	0	0	0	0	9.3e-05	6.7e-05	0	0	0
L(271)	0	0	0	0	0	0	0	0	0	0	0	0.000106	0	0	6.7e-05	0	0	0
C(139)	0	0	0	0	0	0.000329	0.000217	0	0	0	0	0	0	0	0	0	0	0
D(100)	0	0	0	0	0	0	0	0	0	0	0	0.000106	7e-05	0	0	0	0	0
L(89)	0	0	0	0	0	0	0	0	0	0	0	0	0	0	0	0	0.000346	0
I(86)	0	0	0.000349	0	0	0	0	0.000183	0	0	0	0	0	0	0	0	0	0
F(77)	0	0	0	0	0	0	0	0	0.000377	0	0	0	0	9.3e-05	0	0	0	0
L(65)	0	0	0	0	0	0	0	0	0	0	0	0	0	0	0	0.000107	0	0
F(48)	0	0	0.000349	0	0	0	0.000217	0	0	0	0	0	0	0	0	0	0	0
M(902)	0	0.001189	0	0	0	0	0	0	0	0	0	0	0	0	0	0	0.000173	0
G(584)	0	0	0	0	0	0	0	0	0	0.000349	0	0	0	0	0	5.4e-05	0	0
V(31)	0	0	0.000699	0	0	0	0	0	0	0	0	0	0	0	0	0	0	0
N(909)	0	0	0	0	0	0.000329	0	0	0	0	0	0	7e-05	0	0	0	0	0
C(22)	0	0	0	0	0	0	0	0	0.000377	0	0	0.000106	0	0	0	0	0	0
F(920)	0	0	0	0	0	0	0	0	0	0	0	0	7e-05	0	6.7e-05	0	0	0
S(15)	0	0	0	0	0	0	0	0	0	0.000349	0	0	0	0	6.7e-05	0	0	0
V(587)	0	0	0	0	0.000274	0	0	0	0	0	0	0.000106	0	0	0	0	0	0
Y(925)	0	0	0	0	0	0	0	0	0	0	0	0	0	0	0	0.000107	0	0
D(107)	0	0	0	0	0	0	0	0	0	0	0	0	0	0.000186	0	0	0	0
L(142)	0	0	0	0	0	0	0.000217	0	0	0	0	0	0	0	6.7e-05	0	0	0
A(747)	0	0	0	0	0.000274	0.000329	0	0	0	0	0	0	0	0	0	0	0	0
A(840)	0	0	0	0	0.000274	0	0.000217	0	0	0	0	0	0	0	0	0	0	0
M(755)	0	0	0	0	0.000274	0	0.000217	0	0	0	0	0	0	0	0	0	0	0
I(757)	0	0	0	0	0	0	0	0	0	0	0	0.000106	0	9.3e-05	0	0	0	0
A(762)	0	0	0	0	0	0	0	0	0	0	0.00019	0	0	0	0	0	0.000173	0
Q(773)	0	0	0	0	0	0	0	0	0	0	0	0	0	9.3e-05	0	5.4e-05	0	0
L(775)	0	0	0	0	0	0	0.000433	0	0	0	0	0	0	0	0	0	0	0
N(213)	0	0	0	0	0	0	0	0	0	0	0	0	0.000141	0	0	0	0	0
M(794)	0	0	0	0	0	0	0	0	0	0	0	0	0	0	0.000135	0	0	0
C(799)	0	0	0	0	0	0	0	0	0	0	0	0	0	0	0.000135	0	0	0
D(418)	0	0	0	0	0	0	0	0	0.000377	0	0	0	7e-05	0	0	0	0	0
L(178)	0	0	0	0	0	0.000329	0	0	0	0	0	0	0	0	0	0	0.000173	0
Y(175)	0	0	0	0	0	0	0	0	0.000377	0	0.00019	0	0	0	0	0	0	0
E(167)	0	0	0	0	0	0	0	0	0	0	0	0	0	0	0.000135	0	0	0
Y(163)	0	0	0	0	0.000274	0	0	0	0	0	0	0	0	9.3e-05	0	0	0	0
N(158)	0	0	0	0	0	0	0	0	0	0	0	0	0	0.000186	0	0	0	0
L(838)	0	0	0	0	0	0	0	0	0	0	0	0	0	0	0	5.4e-05	0.000173	0
K(417)	0	0	0	0	0	0	0	0	0	0	0	0	0	0	6.7e-05	0	0.000173	0
P(296)	0	0	0	0.000202	0	0	0	0.000183	0	0	0	0	0	0	0	0	0	0
V(535)	0	0	0	0	0.000274	0	0	0	0	0	0	0	0	9.3e-05	0	0	0	0
Y(479)	0	0	0	0	0	0	0	0	0	0	0	0	0	0	6.7e-05	5.4e-05	0	0
P(537)	0	0	0	0	0	0	0	0	0	0	0.00019	0.000106	0	0	0	0	0	0
F(442)	0	0	0	0	0	0	0	0.000183	0	0	0	0.000106	0	0	0	0	0	0
F(441)	0	0	0	0	0	0	0	0	0	0	0	0	7e-05	9.3e-05	0	0	0	0
A(490)	0	0	0	0	0	0	0	0	0	0	0	0	0	9.3e-05	6.7e-05	0	0	0
Q(492)	0	0	0	0	0	0	0	0	0	0	0	0	0	0	6.7e-05	5.4e-05	0	0
W(509)	0	0	0	0	0	0	0	0	0.000377	0	0.00019	0	0	0	0	0	0	0
Y(455)	0	0	0	0	0	0.000329	0	0	0	0.000349	0	0	0	0	0	0	0	0
A(639)	0	0	0	0	0	0	0	0.000183	0	0	0	0	0	0	0	5.4e-05	0	0
A(512)	0	0	0	0	0	0	0	0	0	0	0	0.000211	0	0	0	0	0	0
R(55)	0	0	0	0	0	0	0	0	0	0	0	0.000106	0	0	0	0	0	0
N(705)	0	0	0	0	0	0	0	0.000183	0	0	0	0	0	0	0	0	0	0
D(525)	0	0	0	0	0	0	0	0	0	0	0	0	0	9.3e-05	0	0	0	0
V(844)	0	0	0	0	0.000274	0	0	0	0	0	0	0	0	0	0	0	0	0
G(327)	0	0	0	0	0	0	0	0	0	0	0	0	0	0	6.7e-05	0	0	0
W(216)	0	0	0.000349	0	0	0	0	0	0	0	0	0	0	0	0	0	0	0
C(53)	0	0	0	0	0	0	0.000217	0	0	0	0	0	0	0	0	0	0	0
D(711)	0	0	0.000349	0	0	0	0	0	0	0	0	0	0	0	0	0	0	0
A(634)	0	0	0	0	0	0	0	0	0	0	0	0	0	0	6.7e-05	0	0	0
D(865)	0	0	0	0	0	0	0.000217	0	0	0	0	0	0	0	0	0	0	0
Q(524)	0	0	0	0	0	0	0	0	0	0	0	0	0	0	6.7e-05	0	0	0
I(696)	0	0	0	0	0	0	0	0	0	0	0	0	0	0	6.7e-05	0	0	0
L(241)	0	0	0	0	0	0	0	0	0	0	0	0	7e-05	0	0	0	0	0
Y(273)	0	0	0	0	0	0	0	0	0	0	0	0	0	0	0	5.4e-05	0	0
K(332)	0	0	0	0	0	0	0	0	0	0	0	0	0	9.3e-05	0	0	0	0
M(626)	0	0	0	0	0	0	0	0	0	0.000349	0	0	0	0	0	0	0	0
T(462)	0	0	0	0	0	0	0	0	0	0	0	0	0	0	0	5.4e-05	0	0
T(206)	0	0	0	0	0	0	0	0	0	0	0	0	0	0	6.7e-05	0	0	0
H(650)	0	0	0	0	0	0	0	0	0	0	0	0	0	0	6.7e-05	0	0	0
A(771)	0	0	0	0	0	0	0	0	0	0	0	0	0	0	0	5.4e-05	0	0
Y(265)	0	0	0	0	0	0	0	0	0.000377	0	0	0	0	0	0	0	0	0
N(150)	0	0	0	0	0	0	0	0	0	0	0	0	0	0	0	0	0.000173	0
C(151)	0	0	0	0	0	0	0	0	0	0	0	0	0	0	0	5.4e-05	0	0
V(342)	0	0	0	0	0	0	0	0	0	0	0	0	0	0	6.7e-05	0	0	0
S(343)	0	0	0	0	0	0	0	0	0	0	0	0	0	0	6.7e-05	0	0	0
H(752)	0	0	0	0	0	0	0	0	0.000377	0	0	0	0	0	0	0	0	0
G(345)	0	0	0	0	0	0	0	0	0	0	0	0	0	0	6.7e-05	0	0	0
A(702)	0	0	0	0	0	0	0	0	0	0	0.00019	0	0	0	0	0	0	0
F(753)	0	0	0	0	0	0	0	0	0	0	0	0	0	0	6.7e-05	0	0	0
R(457)	0	0	0	0	0	0	0	0	0	0	0	0	0	0	0	0	0.000173	0
F(348)	0	0	0	0	0.000274	0	0	0	0	0	0	0	0	0	0	0	0	0
G(337)	0	0	0	0	0	0	0	0	0	0	0	0	0	0	0	5.4e-05	0	0
L(437)	0	0	0	0	0	0	0	0	0	0	0	0	0	9.3e-05	0	0	0	0
F(317)	0	0	0	0	0	0	0.000217	0	0	0	0	0	0	0	0	0	0	0
C(622)	0	0	0	0	0	0	0	0	0	0	0	0	7e-05	0	0	0	0	0
M(519)	0	0	0	0	0	0	0	0	0	0	0	0.000106	0	0	0	0	0	0
F(881)	0	0	0	0	0	0	0	0	0	0	0	0	0	9.3e-05	0	0	0	0
C(730)	0	0	0.000349	0	0	0	0	0	0	0	0	0	0	0	0	0	0	0
S(518)	0	0	0.000349	0	0	0	0	0	0	0	0	0	0	0	0	0	0	0
F(134)	0	0	0	0	0	0	0	0	0	0	0	0	0	0	6.7e-05	0	0	0
G(486)	0	0	0	0	0	0	0	0	0	0	0	0	0	0	6.7e-05	0	0	0
G(485)	0	0	0	0	0	0	0	0	0	0	0	0	0	0	6.7e-05	0	0	0
W(290)	0	0	0	0	0	0	0	0	0	0	0	0	0	0	0	0	0	0.007752
P(868)	0	0	0.000349	0	0	0	0	0	0	0	0	0	0	0	0	0	0	0
R(640)	0	0	0.000349	0	0	0	0	0	0	0	0	0	0	0	0	0	0	0
L(576)	0	0	0	0.000202	0	0	0	0	0	0	0	0	0	0	0	0	0	0
H(133)	0	0	0	0	0	0	0	0	0	0.000349	0	0	0	0	0	0	0	0
D(235)	0	0	0	0	0	0	0.000217	0	0	0	0	0	0	0	0	0	0	0
F(283)	0	0	0	0	0	0	0	0	0	0	0	0.000106	0	0	0	0	0	0
Y(483)	0	0	0	0	0	0	0	0	0	0	0	0	0	0	6.7e-05	0	0	0
N(88)	0	0	0	0	0	0	0	0	0	0	0	0.000106	0	0	0	0	0	0
L(727)	0	0	0	0	0	0	0	0	0	0	0	0	0	0	0	5.4e-05	0	0
L(602)	0	0	0	0	0	0	0	0	0	0	0	0	0	9.3e-05	0	0	0	0
C(301)	0	0	0.000349	0	0	0	0	0	0	0	0	0	0	0	0	0	0	0
V(204)	0	0	0	0	0	0	0	0	0	0	0	0	0	9.3e-05	0	0	0	0
L(240)	0	0	0	0	0	0	0	0.000183	0	0	0	0	0	0	0	0	0	0
F(275)	0	0	0	0	0	0	0	0	0	0	0.00019	0	0	0	0	0	0	0
S(78)	0	0	0	0	0	0	0	0	0	0	0	0	0	0	6.7e-05	0	0	0
E(136)	0	0	0	0	0	0	0	0	0	0	0	0.000106	0	0	0	0	0	0
P(620)	0	0	0	0	0.000274	0	0	0	0	0	0	0	0	0	0	0	0	0
K(783)	0	0	0	0	0	0	0	0	0	0	0	0.000106	0	0	0	0	0	0
C(487)	0	0	0	0	0	0	0	0	0	0	0	0	0	0	6.7e-05	0	0	0
L(308)	0	0	0	0.000202	0	0	0	0	0	0	0	0	0	0	0	0	0	0
E(83)	0.001325	0	0	0	0	0	0	0	0	0	0	0	0	0	0	0	0	0
R(105)	0	0	0	0	0	0	0.000217	0	0	0	0	0	0	0	0	0	0	0
L(883)	0	0	0	0.000202	0	0	0	0	0	0	0	0	0	0	0	0	0	0
I(779)	0	0	0	0	0	0	0	0	0	0	0	0	7e-05	0	0	0	0	0
L(470)	0	0	0.000349	0	0	0	0	0	0	0	0	0	0	0	0	0	0	0
Q(724)	0	0	0	0	0	0	0.000217	0	0	0	0	0	0	0	0	0	0	0
N(52)	0	0	0	0	0	0	0	0	0	0	0	0	0	0	0	0	0.000173	0
Y(653)	0	0	0	0	0	0	0	0	0	0	0	0.000106	0	0	0	0	0	0
D(126)	0	0	0	0	0	0	0	0	0	0	0	0	0	0	6.7e-05	0	0	0
L(119)	0	0	0	0	0	0	0	0	0	0	0	0	0	9.3e-05	0	0	0	0
R(858)	0	0	0	0	0	0	0	0	0	0	0	0	0	0	0	5.4e-05	0	0
N(414)	0	0	0.000349	0	0	0	0	0	0	0	0	0	0	0	0	0	0	0
Q(570)	0	0	0	0	0	0	0	0	0	0	0	0	7e-05	0	0	0	0	0
A(17)	0	0	0	0	0	0	0	0	0	0	0.00019	0	0	0	0	0	0	0
R(18)	0	0	0	0	0	0	0	0	0	0	0	0	0	0	0	5.4e-05	0	0
T(409)	0	0	0	0.000202	0	0	0	0	0	0	0	0	0	0	0	0	0	0
E(811)	0	0	0	0	0	0	0	0	0	0	0	0	0	0	6.7e-05	0	0	0
F(594)	0	0	0	0	0	0	0	0	0	0	0	0	7e-05	0	0	0	0	0
L(673)	0	0	0	0	0	0	0	0	0.000377	0	0	0	0	0	0	0	0	0
V(493)	0	0	0	0	0	0	0	0	0	0	0	0	0	0	6.7e-05	0	0	0
I(539)	0	0	0	0	0	0	0	0	0	0	0	0	7e-05	0	0	0	0	0
P(677)	0	0	0	0	0	0	0	0.000183	0	0	0	0	0	0	0	0	0	0
K(188)	0	0	0	0	0	0	0	0	0	0	0	0	0	0	6.7e-05	0	0	0
Y(915)	0	0	0	0	0	0.000329	0	0	0	0	0	0	0	0	0	0	0	0
F(859)	0	0	0	0	0	0	0	0.000183	0	0	0	0	0	0	0	0	0	0
R(183)	0	0	0	0	0	0	0	0	0	0	0.00019	0	0	0	0	0	0	0
K(438)	0	0	0	0	0	0	0	0	0	0	0	0.000106	0	0	0	0	0	0
T(28)	0	0	0	0	0	0	0	0	0	0	0	0	0	9.3e-05	0	0	0	0
Y(921)	0	0	0	0	0	0	0	0	0	0	0	0	7e-05	0	0	0	0	0
L(172)	0.001325	0	0	0	0	0	0	0	0	0	0	0	0	0	0	0	0	0
I(589)	0	0	0	0	0	0	0	0	0	0	0	0	0	0	0	0	0.000173	0
S(433)	0	0	0	0	0	0	0	0	0	0	0	0	0	0	0	5.4e-05	0	0
L(614)	0	0	0	0	0	0	0	0	0	0	0	0	0	0	0	0	0.000173	0
E(610)	0	0	0	0	0	0	0	0	0	0	0.00019	0	0	0	0	0	0	0
N(497)	0	0	0	0	0	0	0	0	0	0	0	0	0	0	6.7e-05	0	0	0
Y(831)	0	0	0	0	0	0	0	0	0	0	0	0	7e-05	0	0	0	0	0
G(427)	0	0	0	0	0	0.000329	0	0	0	0	0	0	0	0	0	0	0	0
K(426)	0	0	0	0	0	0	0	0	0	0	0	0	7e-05	0	0	0	0	0
N(168)	0	0	0	0	0	0	0	0	0	0	0	0	0	0	6.7e-05	0	0	0
S(664)	0	0	0	0	0	0	0	0	0	0	0.00019	0	0	0	0	0	0	0
N(9)	0	0	0	0	0	0	0	0	0	0	0	0	0	9.3e-05	0	0	0	0
F(422)	0	0	0	0	0	0	0.000217	0	0	0	0	0	0	0	0	0	0	0
R(10)	0	0	0	0.000202	0	0	0	0	0	0	0	0	0	0	0	0	0	0
L(498)	0	0	0	0	0	0	0	0	0	0	0	0	0	0	6.7e-05	0	0	0
F(396)	0	0	0	0	0	0	0	0	0	0	0	0	0	0	6.7e-05	0	0	0
V(557)	0	0	0	0.000202	0	0	0	0	0	0	0	0	0	0	0	0	0	0
L(49)	0	0	0	0	0	0	0	0	0	0	0	0	7e-05	0	0	0	0	0
R(392)	0	0	0	0	0	0	0	0	0	0	0	0	0	9.3e-05	0	0	0	0
Y(374)	0	0	0	0	0	0	0	0	0	0	0	0	0	0	6.7e-05	0	0	0
K(159)	0	0	0	0	0	0	0	0	0	0	0	0.000106	0	0	0	0	0	0
L(372)	0	0	0.000349	0	0	0	0	0	0	0	0	0	0	0	0	0	0	0
Y(530)	0	0	0	0	0	0	0	0	0	0	0	0	0	0	6.7e-05	0	0	0
A(688)	0	0	0.000349	0	0	0	0	0	0	0	0	0	0	0	0	0	0	0
F(480)	0	0	0	0	0	0	0	0	0	0	0	0	0	0	6.7e-05	0	0	0
F(368)	0	0	0	0	0	0	0	0	0	0	0	0	0	9.3e-05	0	0	0	0
S(367)	0	0	0	0	0	0	0	0	0	0	0	0	0	0	0	5.4e-05	0	0
R(365)	0	0	0	0.000202	0	0	0	0	0	0	0	0	0	0	0	0	0	0
L(900)	0	0	0	0	0	0	0	0	0	0	0.00019	0	0	0	0	0	0	0
R(513)	0	0	0	0	0	0.000329	0	0	0	0	0	0	0	0	0	0	0	0
G(503)	0	0.001189	0	0	0	0	0	0	0	0	0	0	0	0	0	0	0	0
L(361)	0	0	0	0	0	0	0	0	0	0	0	0	0	9.3e-05	0	0	0	0
Y(453)	0	0	0	0	0	0	0	0	0	0	0.00019	0	0	0	0	0	0	0
F(102)	0	0	0	0	0	0	0	0	0	0	0	0	7e-05	0	0	0	0	0
S(564)	0.001325	0	0	0	0	0	0	0	0	0	0	0	0	0	0	0	0	0
N(39)	0	0.001189	0	0	0	0	0	0	0	0	0	0	0	0	0	0	0	0
R(569)	0	0	0	0	0	0	0	0	0	0	0	0	0	0	0	0	0.000173	0
K(500)	0	0	0	0	0	0	0	0	0	0	0	0	0	0	6.7e-05	0	0	0
V(30)	0	0	0	0	0	0	0	0	0	0	0	0	0	0	6.7e-05	0	0	0
G(616)	0	0	0	0	0	0	0	0	0	0	0	0	0	9.3e-05	0	0	0	0
G(446)	0	0	0	0	0	0	0	0	0	0	0	0	0	9.3e-05	0	0	0	0
L(388)	0	0	0	0	0	0	0	0	0	0	0	0	0	0	0	5.4e-05	0	0
D(499)	0	0	0	0	0	0	0	0	0	0	0	0	0	0	6.7e-05	0	0	0
N(447)	0	0	0	0	0	0	0	0	0	0	0	0	0	0	0	0	0.000173	0
A(448)	0	0	0	0	0	0	0	0	0.000377	0	0	0	0	0	0	0	0	0
A(34)	0	0	0	0.000202	0	0	0	0	0	0	0	0	0	0	0	0	0	0
K(511)	0	0	0	0.000202	0	0	0	0	0	0	0	0	0	0	0	0	0	0
K(798)	0	0	0	0	0	0	0	0	0	0	0	0	0	0	6.7e-05	0	0	0
L(907)	0	0	0	0	0	0	0.000217	0	0	0	0	0	0	0	0	0	0	0
A(685)	0	0	0	0	0	0	0	0	0	0	0	0	0	0	0	5.4e-05	0	0
Y(238)	0	0	0	0.000202	0	0	0	0	0	0	0	0	0	0	0	0	0	0
K(574)	0	0	0	0	0	0	0	0	0	0	0	0	0	0	0	0	0	0
Y(129)	0	0	0	0	0	0	0	0	0	0	0	0	0	0	0	0	0	0
L(854)	0	0	0	0	0	0	0	0	0	0	0	0	0	0	0	0	0	0
C(152)	0	0	0	0	0	0	0	0	0	0	0	0	0	0	0	0	0	0
G(510)	0	0	0	0	0	0	0	0	0	0	0	0	0	0	0	0	0	0
L(131)	0	0	0	0	0	0	0	0	0	0	0	0	0	0	0	0	0	0
D(825)	0	0	0	0	0	0	0	0	0	0	0	0	0	0	0	0	0	0
P(832)	0	0	0	0	0	0	0	0	0	0	0	0	0	0	0	0	0	0
F(165)	0	0	0	0	0	0	0	0	0	0	0	0	0	0	0	0	0	0
Q(573)	0	0	0	0	0	0	0	0	0	0	0	0	0	0	0	0	0	0
S(835)	0	0	0	0	0	0	0	0	0	0	0	0	0	0	0	0	0	0
R(836)	0	0	0	0	0	0	0	0	0	0	0	0	0	0	0	0	0	0
S(501)	0	0	0	0	0	0	0	0	0	0	0	0	0	0	0	0	0	0
A(502)	0	0	0	0	0	0	0	0	0	0	0	0	0	0	0	0	0	0
I(837)	0	0	0	0	0	0	0	0	0	0	0	0	0	0	0	0	0	0
G(839)	0	0	0	0	0	0	0	0	0	0	0	0	0	0	0	0	0	0
F(504)	0	0	0	0	0	0	0	0	0	0	0	0	0	0	0	0	0	0
E(857)	0	0	0	0	0	0	0	0	0	0	0	0	0	0	0	0	0	0
G(841)	0	0	0	0	0	0	0	0	0	0	0	0	0	0	0	0	0	0
C(842)	0	0	0	0	0	0	0	0	0	0	0	0	0	0	0	0	0	0
F(843)	0	0	0	0	0	0	0	0	0	0	0	0	0	0	0	0	0	0
P(505)	0	0	0	0	0	0	0	0	0	0	0	0	0	0	0	0	0	0
D(845)	0	0	0	0	0	0	0	0	0	0	0	0	0	0	0	0	0	0
F(506)	0	0	0	0	0	0	0	0	0	0	0	0	0	0	0	0	0	0
N(507)	0	0	0	0	0	0	0	0	0	0	0	0	0	0	0	0	0	0
K(849)	0	0	0	0	0	0	0	0	0	0	0	0	0	0	0	0	0	0
K(508)	0	0	0	0	0	0	0	0	0	0	0	0	0	0	0	0	0	0
D(851)	0	0	0	0	0	0	0	0	0	0	0	0	0	0	0	0	0	0
G(852)	0	0	0	0	0	0	0	0	0	0	0	0	0	0	0	0	0	0
T(853)	0	0	0	0	0	0	0	0	0	0	0	0	0	0	0	0	0	0
R(132)	0	0	0	0	0	0	0	0	0	0	0	0	0	0	0	0	0	0
T(123)	0	0	0	0	0	0	0	0	0	0	0	0	0	0	0	0	0	0
K(577)	0	0	0	0	0	0	0	0	0	0	0	0	0	0	0	0	0	0
K(121)	0	0	0	0	0	0	0	0	0	0	0	0	0	0	0	0	0	0
W(617)	0	0	0	0	0	0	0	0	0	0	0	0	0	0	0	0	0	0
Y(38)	0	0	0	0	0	0	0	0	0	0	0	0	0	0	0	0	0	0
S(904)	0	0	0	0	0	0	0	0	0	0	0	0	0	0	0	0	0	0
K(41)	0	0	0	0	0	0	0	0	0	0	0	0	0	0	0	0	0	0
Y(903)	0	0	0	0	0	0	0	0	0	0	0	0	0	0	0	0	0	0
D(901)	0	0	0	0	0	0	0	0	0	0	0	0	0	0	0	0	0	0
F(45)	0	0	0	0	0	0	0	0	0	0	0	0	0	0	0	0	0	0
K(47)	0	0	0	0	0	0	0	0	0	0	0	0	0	0	0	0	0	0
K(50)	0	0	0	0	0	0	0	0	0	0	0	0	0	0	0	0	0	0
L(575)	0	0	0	0	0	0	0	0	0	0	0	0	0	0	0	0	0	0
H(898)	0	0	0	0	0	0	0	0	0	0	0	0	0	0	0	0	0	0
C(54)	0	0	0	0	0	0	0	0	0	0	0	0	0	0	0	0	0	0
F(56)	0	0	0	0	0	0	0	0	0	0	0	0	0	0	0	0	0	0
F(528)	0	0	0	0	0	0	0	0	0	0	0	0	0	0	0	0	0	0
E(58)	0	0	0	0	0	0	0	0	0	0	0	0	0	0	0	0	0	0
G(897)	0	0	0	0	0	0	0	0	0	0	0	0	0	0	0	0	0	0
G(597)	0	0	0	0	0	0	0	0	0	0	0	0	0	0	0	0	0	0
D(36)	0	0	0	0	0	0	0	0	0	0	0	0	0	0	0	0	0	0
T(531)	0	0	0	0	0	0	0	0	0	0	0	0	0	0	0	0	0	0
R(33)	0	0	0	0	0	0	0	0	0	0	0	0	0	0	0	0	0	0
K(532)	0	0	0	0	0	0	0	0	0	0	0	0	0	0	0	0	0	0
K(545)	0	0	0	0	0	0	0	0	0	0	0	0	0	0	0	0	0	0
K(593)	0	0	0	0	0	0	0	0	0	0	0	0	0	0	0	0	0	0
N(543)	0	0	0	0	0	0	0	0	0	0	0	0	0	0	0	0	0	0
F(7)	0	0	0	0	0	0	0	0	0	0	0	0	0	0	0	0	0	0
L(8)	0	0	0	0	0	0	0	0	0	0	0	0	0	0	0	0	0	0
M(542)	0	0	0	0	0	0	0	0	0	0	0	0	0	0	0	0	0	0
G(13)	0	0	0	0	0	0	0	0	0	0	0	0	0	0	0	0	0	0
V(14)	0	0	0	0	0	0	0	0	0	0	0	0	0	0	0	0	0	0
Q(541)	0	0	0	0	0	0	0	0	0	0	0	0	0	0	0	0	0	0
T(540)	0	0	0	0	0	0	0	0	0	0	0	0	0	0	0	0	0	0
L(19)	0	0	0	0	0	0	0	0	0	0	0	0	0	0	0	0	0	0
Y(595)	0	0	0	0	0	0	0	0	0	0	0	0	0	0	0	0	0	0
G(23)	0	0	0	0	0	0	0	0	0	0	0	0	0	0	0	0	0	0
T(538)	0	0	0	0	0	0	0	0	0	0	0	0	0	0	0	0	0	0
N(534)	0	0	0	0	0	0	0	0	0	0	0	0	0	0	0	0	0	0
L(895)	0	0	0	0	0	0	0	0	0	0	0	0	0	0	0	0	0	0
D(618)	0	0	0	0	0	0	0	0	0	0	0	0	0	0	0	0	0	0
L(891)	0	0	0	0	0	0	0	0	0	0	0	0	0	0	0	0	0	0
K(871)	0	0	0	0	0	0	0	0	0	0	0	0	0	0	0	0	0	0
K(98)	0	0	0	0	0	0	0	0	0	0	0	0	0	0	0	0	0	0
H(99)	0	0	0	0	0	0	0	0	0	0	0	0	0	0	0	0	0	0
Y(516)	0	0	0	0	0	0	0	0	0	0	0	0	0	0	0	0	0	0
F(101)	0	0	0	0	0	0	0	0	0	0	0	0	0	0	0	0	0	0
A(866)	0	0	0	0	0	0	0	0	0	0	0	0	0	0	0	0	0	0
F(104)	0	0	0	0	0	0	0	0	0	0	0	0	0	0	0	0	0	0
Y(515)	0	0	0	0	0	0	0	0	0	0	0	0	0	0	0	0	0	0
D(623)	0	0	0	0	0	0	0	0	0	0	0	0	0	0	0	0	0	0
I(864)	0	0	0	0	0	0	0	0	0	0	0	0	0	0	0	0	0	0
A(863)	0	0	0	0	0	0	0	0	0	0	0	0	0	0	0	0	0	0
L(862)	0	0	0	0	0	0	0	0	0	0	0	0	0	0	0	0	0	0
S(861)	0	0	0	0	0	0	0	0	0	0	0	0	0	0	0	0	0	0
H(113)	0	0	0	0	0	0	0	0	0	0	0	0	0	0	0	0	0	0
V(860)	0	0	0	0	0	0	0	0	0	0	0	0	0	0	0	0	0	0
R(116)	0	0	0	0	0	0	0	0	0	0	0	0	0	0	0	0	0	0
Y(867)	0	0	0	0	0	0	0	0	0	0	0	0	0	0	0	0	0	0
C(93)	0	0	0	0	0	0	0	0	0	0	0	0	0	0	0	0	0	0
K(890)	0	0	0	0	0	0	0	0	0	0	0	0	0	0	0	0	0	0
H(872)	0	0	0	0	0	0	0	0	0	0	0	0	0	0	0	0	0	0
W(598)	0	0	0	0	0	0	0	0	0	0	0	0	0	0	0	0	0	0
I(888)	0	0	0	0	0	0	0	0	0	0	0	0	0	0	0	0	0	0
Y(887)	0	0	0	0	0	0	0	0	0	0	0	0	0	0	0	0	0	0
A(580)	0	0	0	0	0	0	0	0	0	0	0	0	0	0	0	0	0	0
F(70)	0	0	0	0	0	0	0	0	0	0	0	0	0	0	0	0	0	0
Q(886)	0	0	0	0	0	0	0	0	0	0	0	0	0	0	0	0	0	0
K(73)	0	0	0	0	0	0	0	0	0	0	0	0	0	0	0	0	0	0
R(74)	0	0	0	0	0	0	0	0	0	0	0	0	0	0	0	0	0	0
L(885)	0	0	0	0	0	0	0	0	0	0	0	0	0	0	0	0	0	0
Y(619)	0	0	0	0	0	0	0	0	0	0	0	0	0	0	0	0	0	0
N(79)	0	0	0	0	0	0	0	0	0	0	0	0	0	0	0	0	0	0
S(578)	0	0	0	0	0	0	0	0	0	0	0	0	0	0	0	0	0	0
Y(884)	0	0	0	0	0	0	0	0	0	0	0	0	0	0	0	0	0	0
V(820)	0	0	0	0	0	0	0	0	0	0	0	0	0	0	0	0	0	0
K(621)	0	0	0	0	0	0	0	0	0	0	0	0	0	0	0	0	0	0
K(821)	0	0	0	0	0	0	0	0	0	0	0	0	0	0	0	0	0	0
F(219)	0	0	0	0	0	0	0	0	0	0	0	0	0	0	0	0	0	0
K(551)	0	0	0	0	0	0	0	0	0	0	0	0	0	0	0	0	0	0
L(351)	0	0	0	0	0	0	0	0	0	0	0	0	0	0	0	0	0	0
L(460)	0	0	0	0	0	0	0	0	0	0	0	0	0	0	0	0	0	0
N(703)	0	0	0	0	0	0	0	0	0	0	0	0	0	0	0	0	0	0
P(339)	0	0	0	0	0	0	0	0	0	0	0	0	0	0	0	0	0	0
N(459)	0	0	0	0	0	0	0	0	0	0	0	0	0	0	0	0	0	0
G(559)	0	0	0	0	0	0	0	0	0	0	0	0	0	0	0	0	0	0
F(652)	0	0	0	0	0	0	0	0	0	0	0	0	0	0	0	0	0	0
T(701)	0	0	0	0	0	0	0	0	0	0	0	0	0	0	0	0	0	0
Y(456)	0	0	0	0	0	0	0	0	0	0	0	0	0	0	0	0	0	0
Q(698)	0	0	0	0	0	0	0	0	0	0	0	0	0	0	0	0	0	0
C(646)	0	0	0	0	0	0	0	0	0	0	0	0	0	0	0	0	0	0
N(695)	0	0	0	0	0	0	0	0	0	0	0	0	0	0	0	0	0	0
F(694)	0	0	0	0	0	0	0	0	0	0	0	0	0	0	0	0	0	0
V(693)	0	0	0	0	0	0	0	0	0	0	0	0	0	0	0	0	0	0
S(692)	0	0	0	0	0	0	0	0	0	0	0	0	0	0	0	0	0	0
N(691)	0	0	0	0	0	0	0	0	0	0	0	0	0	0	0	0	0	0
S(363)	0	0	0	0	0	0	0	0	0	0	0	0	0	0	0	0	0	0
A(690)	0	0	0	0	0	0	0	0	0	0	0	0	0	0	0	0	0	0
L(366)	0	0	0	0	0	0	0	0	0	0	0	0	0	0	0	0	0	0
F(334)	0	0	0	0	0	0	0	0	0	0	0	0	0	0	0	0	0	0
L(708)	0	0	0	0	0	0	0	0	0	0	0	0	0	0	0	0	0	0
Q(468)	0	0	0	0	0	0	0	0	0	0	0	0	0	0	0	0	0	0
L(931)	0	0	0	0	0	0	0	0	0	0	0	0	0	0	0	0	0	0
C(306)	0	0	0	0	0	0	0	0	0	0	0	0	0	0	0	0	0	0
R(467)	0	0	0	0	0	0	0	0	0	0	0	0	0	0	0	0	0	0
H(309)	0	0	0	0	0	0	0	0	0	0	0	0	0	0	0	0	0	0
C(310)	0	0	0	0	0	0	0	0	0	0	0	0	0	0	0	0	0	0
D(717)	0	0	0	0	0	0	0	0	0	0	0	0	0	0	0	0	0	0
N(312)	0	0	0	0	0	0	0	0	0	0	0	0	0	0	0	0	0	0
F(313)	0	0	0	0	0	0	0	0	0	0	0	0	0	0	0	0	0	0
N(314)	0	0	0	0	0	0	0	0	0	0	0	0	0	0	0	0	0	0
L(316)	0	0	0	0	0	0	0	0	0	0	0	0	0	0	0	0	0	0
S(709)	0	0	0	0	0	0	0	0	0	0	0	0	0	0	0	0	0	0
S(318)	0	0	0	0	0	0	0	0	0	0	0	0	0	0	0	0	0	0
D(465)	0	0	0	0	0	0	0	0	0	0	0	0	0	0	0	0	0	0
C(645)	0	0	0	0	0	0	0	0	0	0	0	0	0	0	0	0	0	0
F(321)	0	0	0	0	0	0	0	0	0	0	0	0	0	0	0	0	0	0
P(322)	0	0	0	0	0	0	0	0	0	0	0	0	0	0	0	0	0	0
S(561)	0	0	0	0	0	0	0	0	0	0	0	0	0	0	0	0	0	0
T(324)	0	0	0	0	0	0	0	0	0	0	0	0	0	0	0	0	0	0
V(560)	0	0	0	0	0	0	0	0	0	0	0	0	0	0	0	0	0	0
Y(689)	0	0	0	0	0	0	0	0	0	0	0	0	0	0	0	0	0	0
D(452)	0	0	0	0	0	0	0	0	0	0	0	0	0	0	0	0	0	0
T(687)	0	0	0	0	0	0	0	0	0	0	0	0	0	0	0	0	0	0
Y(420)	0	0	0	0	0	0	0	0	0	0	0	0	0	0	0	0	0	0
Q(408)	0	0	0	0	0	0	0	0	0	0	0	0	0	0	0	0	0	0
F(440)	0	0	0	0	0	0	0	0	0	0	0	0	0	0	0	0	0	0
S(672)	0	0	0	0	0	0	0	0	0	0	0	0	0	0	0	0	0	0
G(413)	0	0	0	0	0	0	0	0	0	0	0	0	0	0	0	0	0	0
R(555)	0	0	0	0	0	0	0	0	0	0	0	0	0	0	0	0	0	0
N(416)	0	0	0	0	0	0	0	0	0	0	0	0	0	0	0	0	0	0
R(553)	0	0	0	0	0	0	0	0	0	0	0	0	0	0	0	0	0	0
F(419)	0	0	0	0	0	0	0	0	0	0	0	0	0	0	0	0	0	0
C(669)	0	0	0	0	0	0	0	0	0	0	0	0	0	0	0	0	0	0
A(375)	0	0	0	0	0	0	0	0	0	0	0	0	0	0	0	0	0	0
E(665)	0	0	0	0	0	0	0	0	0	0	0	0	0	0	0	0	0	0
S(425)	0	0	0	0	0	0	0	0	0	0	0	0	0	0	0	0	0	0
F(428)	0	0	0	0	0	0	0	0	0	0	0	0	0	0	0	0	0	0
F(429)	0	0	0	0	0	0	0	0	0	0	0	0	0	0	0	0	0	0
E(431)	0	0	0	0	0	0	0	0	0	0	0	0	0	0	0	0	0	0
G(432)	0	0	0	0	0	0	0	0	0	0	0	0	0	0	0	0	0	0
L(663)	0	0	0	0	0	0	0	0	0	0	0	0	0	0	0	0	0	0
V(662)	0	0	0	0	0	0	0	0	0	0	0	0	0	0	0	0	0	0
F(407)	0	0	0	0	0	0	0	0	0	0	0	0	0	0	0	0	0	0
Y(674)	0	0	0	0	0	0	0	0	0	0	0	0	0	0	0	0	0	0
T(556)	0	0	0	0	0	0	0	0	0	0	0	0	0	0	0	0	0	0
C(659)	0	0	0	0	0	0	0	0	0	0	0	0	0	0	0	0	0	0
R(654)	0	0	0	0	0	0	0	0	0	0	0	0	0	0	0	0	0	0
D(377)	0	0	0	0	0	0	0	0	0	0	0	0	0	0	0	0	0	0
T(686)	0	0	0	0	0	0	0	0	0	0	0	0	0	0	0	0	0	0
L(655)	0	0	0	0	0	0	0	0	0	0	0	0	0	0	0	0	0	0
H(381)	0	0	0	0	0	0	0	0	0	0	0	0	0	0	0	0	0	0
G(683)	0	0	0	0	0	0	0	0	0	0	0	0	0	0	0	0	0	0
S(682)	0	0	0	0	0	0	0	0	0	0	0	0	0	0	0	0	0	0
S(384)	0	0	0	0	0	0	0	0	0	0	0	0	0	0	0	0	0	0
L(387)	0	0	0	0	0	0	0	0	0	0	0	0	0	0	0	0	0	0
D(390)	0	0	0	0	0	0	0	0	0	0	0	0	0	0	0	0	0	0
N(657)	0	0	0	0	0	0	0	0	0	0	0	0	0	0	0	0	0	0
S(681)	0	0	0	0	0	0	0	0	0	0	0	0	0	0	0	0	0	0
C(395)	0	0	0	0	0	0	0	0	0	0	0	0	0	0	0	0	0	0
S(397)	0	0	0	0	0	0	0	0	0	0	0	0	0	0	0	0	0	0
T(680)	0	0	0	0	0	0	0	0	0	0	0	0	0	0	0	0	0	0
G(679)	0	0	0	0	0	0	0	0	0	0	0	0	0	0	0	0	0	0
E(658)	0	0	0	0	0	0	0	0	0	0	0	0	0	0	0	0	0	0
R(305)	0	0	0	0	0	0	0	0	0	0	0	0	0	0	0	0	0	0
Y(728)	0	0	0	0	0	0	0	0	0	0	0	0	0	0	0	0	0	0
L(819)	0	0	0	0	0	0	0	0	0	0	0	0	0	0	0	0	0	0
G(220)	0	0	0	0	0	0	0	0	0	0	0	0	0	0	0	0	0	0
Q(210)	0	0	0	0	0	0	0	0	0	0	0	0	0	0	0	0	0	0
D(211)	0	0	0	0	0	0	0	0	0	0	0	0	0	0	0	0	0	0
Y(788)	0	0	0	0	0	0	0	0	0	0	0	0	0	0	0	0	0	0
G(214)	0	0	0	0	0	0	0	0	0	0	0	0	0	0	0	0	0	0
Y(787)	0	0	0	0	0	0	0	0	0	0	0	0	0	0	0	0	0	0
Y(217)	0	0	0	0	0	0	0	0	0	0	0	0	0	0	0	0	0	0
D(218)	0	0	0	0	0	0	0	0	0	0	0	0	0	0	0	0	0	0
Q(661)	0	0	0	0	0	0	0	0	0	0	0	0	0	0	0	0	0	0
D(221)	0	0	0	0	0	0	0	0	0	0	0	0	0	0	0	0	0	0
D(208)	0	0	0	0	0	0	0	0	0	0	0	0	0	0	0	0	0	0
L(786)	0	0	0	0	0	0	0	0	0	0	0	0	0	0	0	0	0	0
V(785)	0	0	0	0	0	0	0	0	0	0	0	0	0	0	0	0	0	0
P(627)	0	0	0	0	0	0	0	0	0	0	0	0	0	0	0	0	0	0
S(784)	0	0	0	0	0	0	0	0	0	0	0	0	0	0	0	0	0	0
N(781)	0	0	0	0	0	0	0	0	0	0	0	0	0	0	0	0	0	0
G(230)	0	0	0	0	0	0	0	0	0	0	0	0	0	0	0	0	0	0
S(772)	0	0	0	0	0	0	0	0	0	0	0	0	0	0	0	0	0	0
T(567)	0	0	0	0	0	0	0	0	0	0	0	0	0	0	0	0	0	0
N(209)	0	0	0	0	0	0	0	0	0	0	0	0	0	0	0	0	0	0
L(207)	0	0	0	0	0	0	0	0	0	0	0	0	0	0	0	0	0	0
C(298)	0	0	0	0	0	0	0	0	0	0	0	0	0	0	0	0	0	0
W(800)	0	0	0	0	0	0	0	0	0	0	0	0	0	0	0	0	0	0
T(817)	0	0	0	0	0	0	0	0	0	0	0	0	0	0	0	0	0	0
N(552)	0	0	0	0	0	0	0	0	0	0	0	0	0	0	0	0	0	0
F(571)	0	0	0	0	0	0	0	0	0	0	0	0	0	0	0	0	0	0
E(180)	0	0	0	0	0	0	0	0	0	0	0	0	0	0	0	0	0	0
Q(815)	0	0	0	0	0	0	0	0	0	0	0	0	0	0	0	0	0	0
V(182)	0	0	0	0	0	0	0	0	0	0	0	0	0	0	0	0	0	0
S(814)	0	0	0	0	0	0	0	0	0	0	0	0	0	0	0	0	0	0
T(189)	0	0	0	0	0	0	0	0	0	0	0	0	0	0	0	0	0	0
R(624)	0	0	0	0	0	0	0	0	0	0	0	0	0	0	0	0	0	0
L(205)	0	0	0	0	0	0	0	0	0	0	0	0	0	0	0	0	0	0
C(193)	0	0	0	0	0	0	0	0	0	0	0	0	0	0	0	0	0	0
N(791)	0	0	0	0	0	0	0	0	0	0	0	0	0	0	0	0	0	0
N(790)	0	0	0	0	0	0	0	0	0	0	0	0	0	0	0	0	0	0
N(568)	0	0	0	0	0	0	0	0	0	0	0	0	0	0	0	0	0	0
G(200)	0	0	0	0	0	0	0	0	0	0	0	0	0	0	0	0	0	0
Q(789)	0	0	0	0	0	0	0	0	0	0	0	0	0	0	0	0	0	0
V(202)	0	0	0	0	0	0	0	0	0	0	0	0	0	0	0	0	0	0
G(203)	0	0	0	0	0	0	0	0	0	0	0	0	0	0	0	0	0	0
S(236)	0	0	0	0	0	0	0	0	0	0	0	0	0	0	0	0	0	0
Y(237)	0	0	0	0	0	0	0	0	0	0	0	0	0	0	0	0	0	0
T(565)	0	0	0	0	0	0	0	0	0	0	0	0	0	0	0	0	0	0
R(733)	0	0	0	0	0	0	0	0	0	0	0	0	0	0	0	0	0	0
P(612)	0	0	0	0	0	0	0	0	0	0	0	0	0	0	0	0	0	0
Y(746)	0	0	0	0	0	0	0	0	0	0	0	0	0	0	0	0	0	0
F(745)	0	0	0	0	0	0	0	0	0	0	0	0	0	0	0	0	0	0
F(741)	0	0	0	0	0	0	0	0	0	0	0	0	0	0	0	0	0	0
V(475)	0	0	0	0	0	0	0	0	0	0	0	0	0	0	0	0	0	0
C(563)	0	0	0	0	0	0	0	0	0	0	0	0	0	0	0	0	0	0
V(609)	0	0	0	0	0	0	0	0	0	0	0	0	0	0	0	0	0	0
E(474)	0	0	0	0	0	0	0	0	0	0	0	0	0	0	0	0	0	0
Y(286)	0	0	0	0	0	0	0	0	0	0	0	0	0	0	0	0	0	0
P(243)	0	0	0	0	0	0	0	0	0	0	0	0	0	0	0	0	0	0
F(287)	0	0	0	0	0	0	0	0	0	0	0	0	0	0	0	0	0	0
Y(732)	0	0	0	0	0	0	0	0	0	0	0	0	0	0	0	0	0	0
D(291)	0	0	0	0	0	0	0	0	0	0	0	0	0	0	0	0	0	0
K(641)	0	0	0	0	0	0	0	0	0	0	0	0	0	0	0	0	0	0
L(731)	0	0	0	0	0	0	0	0	0	0	0	0	0	0	0	0	0	0
Y(294)	0	0	0	0	0	0	0	0	0	0	0	0	0	0	0	0	0	0
G(590)	0	0	0	0	0	0	0	0	0	0	0	0	0	0	0	0	0	0
H(642)	0	0	0	0	0	0	0	0	0	0	0	0	0	0	0	0	0	0
K(272)	0	0	0	0	0	0	0	0	0	0	0	0	0	0	0	0	0	0
S(635)	0	0	0	0	0	0	0	0	0	0	0	0	0	0	0	0	0	0
Y(748)	0	0	0	0	0	0	0	0	0	0	0	0	0	0	0	0	0	0
W(268)	0	0	0	0	0	0	0	0	0	0	0	0	0	0	0	0	0	0
N(628)	0	0	0	0	0	0	0	0	0	0	0	0	0	0	0	0	0	0
Y(770)	0	0	0	0	0	0	0	0	0	0	0	0	0	0	0	0	0	0
N(767)	0	0	0	0	0	0	0	0	0	0	0	0	0	0	0	0	0	0
F(766)	0	0	0	0	0	0	0	0	0	0	0	0	0	0	0	0	0	0
C(765)	0	0	0	0	0	0	0	0	0	0	0	0	0	0	0	0	0	0
L(251)	0	0	0	0	0	0	0	0	0	0	0	0	0	0	0	0	0	0
V(764)	0	0	0	0	0	0	0	0	0	0	0	0	0	0	0	0	0	0
R(631)	0	0	0	0	0	0	0	0	0	0	0	0	0	0	0	0	0	0
D(761)	0	0	0	0	0	0	0	0	0	0	0	0	0	0	0	0	0	0
S(255)	0	0	0	0	0	0	0	0	0	0	0	0	0	0	0	0	0	0
D(760)	0	0	0	0	0	0	0	0	0	0	0	0	0	0	0	0	0	0
S(759)	0	0	0	0	0	0	0	0	0	0	0	0	0	0	0	0	0	0
L(758)	0	0	0	0	0	0	0	0	0	0	0	0	0	0	0	0	0	0
L(261)	0	0	0	0	0	0	0	0	0	0	0	0	0	0	0	0	0	0
S(754)	0	0	0	0	0	0	0	0	0	0	0	0	0	0	0	0	0	0
K(751)	0	0	0	0	0	0	0	0	0	0	0	0	0	0	0	0	0	0
L(749)	0	0	0	0	0	0	0	0	0	0	0	0	0	0	0	0	0	0
D(274)	0	0	0	0	0	0	0	0	0	0	0	0	0	0	0	0	0	0

## Sheet: SequenceCount
	0
2019-11-30	0
2019-12-31	23
2020-01-31	755
2020-02-29	841
2020-03-31	2863
2020-04-30	4947
2020-05-31	3651
2020-06-30	3043
2020-07-31	4615
2020-08-31	5469
2020-09-30	2654
2020-10-31	2868
2020-11-30	5270
2020-12-31	9458
2021-01-31	14217
2021-02-28	10754
2021-03-31	14837
2021-04-30	18685
2021-05-31	5780
2021-06-30	129
2019-11-30
2019-12-31
2020-01-31
2020-02-29
2020-03-31
2020-04-30
2020-05-31
2020-06-30
2020-07-31
2020-08-31
2020-09-30
2020-10-31
2020-11-30
2020-12-31
2021-01-31
2021-02-28
2021-03-31
2021-04-30
2021-05-31
2021-06-30
2019-11-30
2019-12-31
2020-01-31
2020-02-29
2020-03-31
2020-04-30
2020-05-31
2020-06-30
2020-07-31
2020-08-31
2020-09-30
2020-10-31
2020-11-30
2020-12-31
2021-01-31
2021-02-28
2021-03-31
2021-04-30
2021-05-31
2021-06-30
2019-11-30
2019-12-31
2020-01-31
2020-02-29
2020-03-31
2020-04-30
2020-05-31
2020-06-30
2020-07-31
2020-08-31
2020-09-30
2020-10-31
2020-11-30
2020-12-31
2021-01-31
2021-02-28
2021-03-31
2021-04-30
2021-05-31
2021-06-30
2019-11-30
2019-12-31
2020-01-31
2020-02-29
2020-03-31
2020-04-30
2020-05-31
2020-06-30
2020-07-31
2020-08-31
2020-09-30
2020-10-31
2020-11-30
2020-12-31
2021-01-31
2021-02-28
2021-03-31
2021-04-30
2021-05-31
2021-06-30
2019-11-30
2019-12-31
2020-01-31
2020-02-29
2020-03-31
2020-04-30
2020-05-31
2020-06-30
2020-07-31
2020-08-31
2020-09-30
2020-10-31
2020-11-30
2020-12-31
2021-01-31
2021-02-28
2021-03-31
2021-04-30
2021-05-31
2021-06-30
2019-11-30
2019-12-31
2020-01-31
2020-02-29
2020-03-31
2020-04-30
2020-05-31
2020-06-30
2020-07-31
2020-08-31
2020-09-30
2020-10-31
2020-11-30
2020-12-31
2021-01-31
2021-02-28
2021-03-31
2021-04-30
2021-05-31
2021-06-30
2019-11-30
2019-12-31
2020-01-31
2020-02-29
2020-03-31
2020-04-30
2020-05-31
2020-06-30
2020-07-31
2020-08-31
2020-09-30
2020-10-31
2020-11-30
2020-12-31
2021-01-31
2021-02-28
2021-03-31
2021-04-30
2021-05-31
2021-06-30
2019-11-30
2019-12-31
2020-01-31
2020-02-29
2020-03-31
2020-04-30
2020-05-31
2020-06-30
2020-07-31
2020-08-31
2020-09-30
2020-10-31
2020-11-30
2020-12-31
2021-01-31
2021-02-28
2021-03-31
2021-04-30
2021-05-31
2021-06-30
2019-11-30
2019-12-31
2020-01-31
2020-02-29
2020-03-31
2020-04-30
2020-05-31
2020-06-30
2020-07-31
2020-08-31
2020-09-30
2020-10-31
2020-11-30
2020-12-31
2021-01-31
2021-02-28
2021-03-31
2021-04-30
2021-05-31
2021-06-30
2019-11-30
2019-12-31
2020-01-31
2020-02-29
2020-03-31
2020-04-30
2020-05-31
2020-06-30
2020-07-31
2020-08-31
2020-09-30
2020-10-31
2020-11-30
2020-12-31
2021-01-31
2021-02-28
2021-03-31
2021-04-30
2021-05-31
2021-06-30
2019-11-30
2019-12-31
2020-01-31
2020-02-29
2020-03-31
2020-04-30
2020-05-31
2020-06-30
2020-07-31
2020-08-31
2020-09-30
2020-10-31
2020-11-30
2020-12-31
2021-01-31
2021-02-28
2021-03-31
2021-04-30
2021-05-31
2021-06-30
2019-11-30
2019-12-31
2020-01-31
2020-02-29
2020-03-31
2020-04-30
2020-05-31
2020-06-30
2020-07-31
2020-08-31
2020-09-30
2020-10-31
2020-11-30
2020-12-31
2021-01-31
2021-02-28
2021-03-31
2021-04-30
2021-05-31
2021-06-30
2019-11-30
2019-12-31
2020-01-31
2020-02-29
2020-03-31
2020-04-30
2020-05-31
2020-06-30
2020-07-31
2020-08-31
2020-09-30
2020-10-31
2020-11-30
2020-12-31
2021-01-31
2021-02-28
2021-03-31
2021-04-30
2021-05-31
2021-06-30
2019-11-30
2019-12-31
2020-01-31
2020-02-29
2020-03-31
2020-04-30
2020-05-31
2020-06-30
2020-07-31
2020-08-31
2020-09-30
2020-10-31
2020-11-30
2020-12-31
2021-01-31
2021-02-28
2021-03-31
2021-04-30
2021-05-31
2021-06-30
2019-11-30
2019-12-31
2020-01-31
2020-02-29
2020-03-31
2020-04-30
2020-05-31
2020-06-30
2020-07-31
2020-08-31
2020-09-30
2020-10-31
2020-11-30
2020-12-31
2021-01-31
2021-02-28
2021-03-31
2021-04-30
2021-05-31
2021-06-30
2019-11-30
2019-12-31
2020-01-31
2020-02-29
2020-03-31
2020-04-30
2020-05-31
2020-06-30
2020-07-31
2020-08-31
2020-09-30
2020-10-31
2020-11-30
2020-12-31
2021-01-31
2021-02-28
2021-03-31
2021-04-30
2021-05-31
2021-06-30
2019-11-30
2019-12-31
2020-01-31
2020-02-29
2020-03-31
2020-04-30
2020-05-31
2020-06-30
2020-07-31
2020-08-31
2020-09-30
2020-10-31
2020-11-30
2020-12-31
2021-01-31
2021-02-28
2021-03-31
2021-04-30
2021-05-31
2021-06-30
2019-11-30
2019-12-31
2020-01-31
2020-02-29
2020-03-31
2020-04-30
2020-05-31
2020-06-30
2020-07-31
2020-08-31
2020-09-30
2020-10-31
2020-11-30
2020-12-31
2021-01-31
2021-02-28
2021-03-31
2021-04-30
2021-05-31
2021-06-30
2019-11-30
2019-12-31
2020-01-31
2020-02-29
2020-03-31
2020-04-30
2020-05-31
2020-06-30
2020-07-31
2020-08-31
2020-09-30
2020-10-31
2020-11-30
2020-12-31
2021-01-31
2021-02-28
2021-03-31
2021-04-30
2021-05-31
2021-06-30
2019-11-30
2019-12-31
2020-01-31
2020-02-29
2020-03-31
2020-04-30
2020-05-31
2020-06-30
2020-07-31
2020-08-31
2020-09-30
2020-10-31
2020-11-30
2020-12-31
2021-01-31
2021-02-28
2021-03-31
2021-04-30
2021-05-31
2021-06-30
2019-11-30
2019-12-31
2020-01-31
2020-02-29
2020-03-31
2020-04-30
2020-05-31
2020-06-30
2020-07-31
2020-08-31
2020-09-30
2020-10-31
2020-11-30
2020-12-31
2021-01-31
2021-02-28
2021-03-31
2021-04-30
2021-05-31
2021-06-30
2019-11-30
2019-12-31
2020-01-31
2020-02-29
2020-03-31
2020-04-30
2020-05-31
2020-06-30
2020-07-31
2020-08-31
2020-09-30
2020-10-31
2020-11-30
2020-12-31
2021-01-31
2021-02-28
2021-03-31
2021-04-30
2021-05-31
2021-06-30
2019-11-30
2019-12-31
2020-01-31
2020-02-29
2020-03-31
2020-04-30
2020-05-31
2020-06-30
2020-07-31
2020-08-31
2020-09-30
2020-10-31
2020-11-30
2020-12-31
2021-01-31
2021-02-28
2021-03-31
2021-04-30
2021-05-31
2021-06-30
2019-11-30
2019-12-31
2020-01-31
2020-02-29
2020-03-31
2020-04-30
2020-05-31
2020-06-30
2020-07-31
2020-08-31
2020-09-30
2020-10-31
2020-11-30
2020-12-31
2021-01-31
2021-02-28
2021-03-31
2021-04-30
2021-05-31
2021-06-30
2019-11-30
2019-12-31
2020-01-31
2020-02-29
2020-03-31
2020-04-30
2020-05-31
2020-06-30
2020-07-31
2020-08-31
2020-09-30
2020-10-31
2020-11-30
2020-12-31
2021-01-31
2021-02-28
2021-03-31
2021-04-30
2021-05-31
2021-06-30
2019-11-30
2019-12-31
2020-01-31
2020-02-29
2020-03-31
2020-04-30
2020-05-31
2020-06-30
2020-07-31
2020-08-31
2020-09-30
2020-10-31
2020-11-30
2020-12-31
2021-01-31
2021-02-28
2021-03-31
2021-04-30
2021-05-31
2021-06-30
2019-11-30
2019-12-31
2020-01-31
2020-02-29
2020-03-31
2020-04-30
2020-05-31
2020-06-30
2020-07-31
2020-08-31
2020-09-30
2020-10-31
2020-11-30
2020-12-31
2021-01-31
2021-02-28
2021-03-31
2021-04-30
2021-05-31
2021-06-30
2019-11-30
2019-12-31
2020-01-31
2020-02-29
2020-03-31
2020-04-30
2020-05-31
2020-06-30
2020-07-31
2020-08-31
2020-09-30
2020-10-31
2020-11-30
2020-12-31
2021-01-31
2021-02-28
2021-03-31
2021-04-30
2021-05-31
2021-06-30
2019-11-30
2019-12-31
2020-01-31
2020-02-29
2020-03-31
2020-04-30
2020-05-31
2020-06-30
2020-07-31
2020-08-31
2020-09-30
2020-10-31
2020-11-30
2020-12-31
2021-01-31
2021-02-28
2021-03-31
2021-04-30
2021-05-31
2021-06-30
2019-11-30
2019-12-31
2020-01-31
2020-02-29
2020-03-31
2020-04-30
2020-05-31
2020-06-30
2020-07-31
2020-08-31
2020-09-30
2020-10-31
2020-11-30
2020-12-31
2021-01-31
2021-02-28
2021-03-31
2021-04-30
2021-05-31
2021-06-30
2019-11-30
2019-12-31
2020-01-31
2020-02-29
2020-03-31
2020-04-30
2020-05-31
2020-06-30
2020-07-31
2020-08-31
2020-09-30
2020-10-31
2020-11-30
2020-12-31
2021-01-31
2021-02-28
2021-03-31
2021-04-30
2021-05-31
2021-06-30
2019-11-30
2019-12-31
2020-01-31
2020-02-29
2020-03-31
2020-04-30
2020-05-31
2020-06-30
2020-07-31
2020-08-31
2020-09-30
2020-10-31
2020-11-30
2020-12-31
2021-01-31
2021-02-28
2021-03-31
2021-04-30
2021-05-31
2021-06-30
2019-11-30
2019-12-31
2020-01-31
2020-02-29
2020-03-31
2020-04-30
2020-05-31
2020-06-30
2020-07-31
2020-08-31
2020-09-30
2020-10-31
2020-11-30
2020-12-31
2021-01-31
2021-02-28
2021-03-31
2021-04-30
2021-05-31
2021-06-30
2019-11-30
2019-12-31
2020-01-31
2020-02-29
2020-03-31
2020-04-30
2020-05-31
2020-06-30
2020-07-31
2020-08-31
2020-09-30
2020-10-31
2020-11-30
2020-12-31
2021-01-31
2021-02-28
2021-03-31
2021-04-30
2021-05-31
2021-06-30
2019-11-30
2019-12-31
2020-01-31
2020-02-29
2020-03-31
2020-04-30
2020-05-31
2020-06-30
2020-07-31
2020-08-31
2020-09-30
2020-10-31
2020-11-30
2020-12-31
2021-01-31
2021-02-28
2021-03-31
2021-04-30
2021-05-31
2021-06-30
2019-11-30
2019-12-31
2020-01-31
2020-02-29
2020-03-31
2020-04-30
2020-05-31
2020-06-30
2020-07-31
2020-08-31
2020-09-30
2020-10-31
2020-11-30
2020-12-31
2021-01-31
2021-02-28
2021-03-31
2021-04-30
2021-05-31
2021-06-30
2019-11-30
2019-12-31
2020-01-31
2020-02-29
2020-03-31
2020-04-30
2020-05-31
2020-06-30
2020-07-31
2020-08-31
2020-09-30
2020-10-31
2020-11-30
2020-12-31
2021-01-31
2021-02-28
2021-03-31
2021-04-30
2021-05-31
2021-06-30
2019-11-30
2019-12-31
2020-01-31
2020-02-29
2020-03-31
2020-04-30
2020-05-31
2020-06-30
2020-07-31
2020-08-31
2020-09-30
2020-10-31
2020-11-30
2020-12-31
2021-01-31
2021-02-28
2021-03-31
2021-04-30
2021-05-31
2021-06-30
2019-11-30
2019-12-31
2020-01-31
2020-02-29
2020-03-31
2020-04-30
2020-05-31
2020-06-30
2020-07-31
2020-08-31
2020-09-30
2020-10-31
2020-11-30
2020-12-31
2021-01-31
2021-02-28
2021-03-31
2021-04-30
2021-05-31
2021-06-30
2019-11-30
2019-12-31
2020-01-31
2020-02-29
2020-03-31
2020-04-30
2020-05-31
2020-06-30
2020-07-31
2020-08-31
2020-09-30
2020-10-31
2020-11-30
2020-12-31
2021-01-31
2021-02-28
2021-03-31
2021-04-30
2021-05-31
2021-06-30
2019-11-30
2019-12-31
2020-01-31
2020-02-29
2020-03-31
2020-04-30
2020-05-31
2020-06-30
2020-07-31
2020-08-31
2020-09-30
2020-10-31
2020-11-30
2020-12-31
2021-01-31
2021-02-28
2021-03-31
2021-04-30
2021-05-31
2021-06-30
2019-11-30
2019-12-31
2020-01-31
2020-02-29
2020-03-31
2020-04-30
2020-05-31
2020-06-30
2020-07-31
2020-08-31
2020-09-30
2020-10-31
2020-11-30
2020-12-31
2021-01-31
2021-02-28
2021-03-31
2021-04-30
2021-05-31
2021-06-30
2019-11-30
2019-12-31
2020-01-31
2020-02-29
2020-03-31
2020-04-30
2020-05-31
2020-06-30
2020-07-31
2020-08-31
2020-09-30
2020-10-31
2020-11-30
2020-12-31
2021-01-31
2021-02-28
2021-03-31
2021-04-30
2021-05-31
2021-06-30
2019-11-30
2019-12-31
2020-01-31
2020-02-29
2020-03-31
2020-04-30
2020-05-31
2020-06-30
2020-07-31
2020-08-31
2020-09-30
2020-10-31
2020-11-30
2020-12-31
2021-01-31
2021-02-28
2021-03-31
2021-04-30
2021-05-31
2021-06-30
2019-11-30
2019-12-31
2020-01-31
2020-02-29
2020-03-31
2020-04-30
2020-05-31
2020-06-30
2020-07-31
2020-08-31
2020-09-30
2020-10-31
2020-11-30
2020-12-31
2021-01-31
2021-02-28
2021-03-31
2021-04-30
2021-05-31
2021-06-30
2019-11-30
2019-12-31
2020-01-31
2020-02-29
2020-03-31
2020-04-30
2020-05-31
2020-06-30
2020-07-31
2020-08-31
2020-09-30
2020-10-31
2020-11-30
2020-12-31
2021-01-31
2021-02-28
2021-03-31
2021-04-30
2021-05-31
2021-06-30
2019-11-30
2019-12-31
2020-01-31
2020-02-29
2020-03-31
2020-04-30
2020-05-31
2020-06-30
2020-07-31
2020-08-31
2020-09-30
2020-10-31
2020-11-30
2020-12-31
2021-01-31
2021-02-28
2021-03-31
2021-04-30
2021-05-31
2021-06-30
2019-11-30
2019-12-31
2020-01-31
2020-02-29
2020-03-31
2020-04-30
2020-05-31
2020-06-30
2020-07-31
2020-08-31
2020-09-30
2020-10-31
2020-11-30
2020-12-31
2021-01-31
2021-02-28
2021-03-31
2021-04-30
2021-05-31
2021-06-30
2019-11-30
2019-12-31
2020-01-31
2020-02-29
2020-03-31
2020-04-30
2020-05-31
2020-06-30
2020-07-31
2020-08-31
2020-09-30
2020-10-31
2020-11-30
2020-12-31
2021-01-31
2021-02-28
2021-03-31
2021-04-30
2021-05-31
2021-06-30
2019-11-30
2019-12-31
2020-01-31
2020-02-29
2020-03-31
2020-04-30
2020-05-31
2020-06-30
2020-07-31
2020-08-31
2020-09-30
2020-10-31
2020-11-30
2020-12-31
2021-01-31
2021-02-28
2021-03-31
2021-04-30
2021-05-31
2021-06-30
2019-11-30
2019-12-31
2020-01-31
2020-02-29
2020-03-31
2020-04-30
2020-05-31
2020-06-30
2020-07-31
2020-08-31
2020-09-30
2020-10-31
2020-11-30
2020-12-31
2021-01-31
2021-02-28
2021-03-31
2021-04-30
2021-05-31
2021-06-30
2019-11-30
2019-12-31
2020-01-31
2020-02-29
2020-03-31
2020-04-30
2020-05-31
2020-06-30
2020-07-31
2020-08-31
2020-09-30
2020-10-31
2020-11-30
2020-12-31
2021-01-31
2021-02-28
2021-03-31
2021-04-30
2021-05-31
2021-06-30
2019-11-30
2019-12-31
2020-01-31
2020-02-29
2020-03-31
2020-04-30
2020-05-31
2020-06-30
2020-07-31
2020-08-31
2020-09-30
2020-10-31
2020-11-30
2020-12-31
2021-01-31
2021-02-28
2021-03-31
2021-04-30
2021-05-31
2021-06-30
2019-11-30
2019-12-31
2020-01-31
2020-02-29
2020-03-31
2020-04-30
2020-05-31
2020-06-30
2020-07-31
2020-08-31
2020-09-30
2020-10-31
2020-11-30
2020-12-31
2021-01-31
2021-02-28
2021-03-31
2021-04-30
2021-05-31
2021-06-30
2019-11-30
2019-12-31
2020-01-31
2020-02-29
2020-03-31
2020-04-30
2020-05-31
2020-06-30
2020-07-31
2020-08-31
2020-09-30
2020-10-31
2020-11-30
2020-12-31
2021-01-31
2021-02-28
2021-03-31
2021-04-30
2021-05-31
2021-06-30
2019-11-30
2019-12-31
2020-01-31
2020-02-29
2020-03-31
2020-04-30
2020-05-31
2020-06-30
2020-07-31
2020-08-31
2020-09-30
2020-10-31
2020-11-30
2020-12-31
2021-01-31
2021-02-28
2021-03-31
2021-04-30
2021-05-31
2021-06-30
2019-11-30
2019-12-31
2020-01-31
2020-02-29
2020-03-31
2020-04-30
2020-05-31
2020-06-30
2020-07-31
2020-08-31
2020-09-30
2020-10-31
2020-11-30
2020-12-31
2021-01-31
2021-02-28
2021-03-31
2021-04-30
2021-05-31
2021-06-30
2019-11-30
2019-12-31
2020-01-31
2020-02-29
2020-03-31
2020-04-30
2020-05-31
2020-06-30
2020-07-31
2020-08-31
2020-09-30
2020-10-31
2020-11-30
2020-12-31
2021-01-31
2021-02-28
2021-03-31
2021-04-30
2021-05-31
2021-06-30
2019-11-30
2019-12-31
2020-01-31
2020-02-29
2020-03-31
2020-04-30
2020-05-31
2020-06-30
2020-07-31
2020-08-31
2020-09-30
2020-10-31
2020-11-30
2020-12-31
2021-01-31
2021-02-28
2021-03-31
2021-04-30
2021-05-31
2021-06-30
2019-11-30
2019-12-31
2020-01-31
2020-02-29
2020-03-31
2020-04-30
2020-05-31
2020-06-30
2020-07-31
2020-08-31
2020-09-30
2020-10-31
2020-11-30
2020-12-31
2021-01-31
2021-02-28
2021-03-31
2021-04-30
2021-05-31
2021-06-30
2019-11-30
2019-12-31
2020-01-31
2020-02-29
2020-03-31
2020-04-30
2020-05-31
2020-06-30
2020-07-31
2020-08-31
2020-09-30
2020-10-31
2020-11-30
2020-12-31
2021-01-31
2021-02-28
2021-03-31
2021-04-30
2021-05-31
2021-06-30
2019-11-30
2019-12-31
2020-01-31
2020-02-29
2020-03-31
2020-04-30
2020-05-31
2020-06-30
2020-07-31
2020-08-31
2020-09-30
2020-10-31
2020-11-30
2020-12-31
2021-01-31
2021-02-28
2021-03-31
2021-04-30
2021-05-31
2021-06-30
2019-11-30
2019-12-31
2020-01-31
2020-02-29
2020-03-31
2020-04-30
2020-05-31
2020-06-30
2020-07-31
2020-08-31
2020-09-30
2020-10-31
2020-11-30
2020-12-31
2021-01-31
2021-02-28
2021-03-31
2021-04-30
2021-05-31
2021-06-30
