# Supplementary material for: SARS-CoV-2 NSP-12 mutations survey during the pandemic in the world
Source: Research Square preprint supplement (doi:10.21203/rs.3.rs-877078/v1), 2021-09-22
Supplement: Supplementary file 4 [file d32a94fc98636ef6bbf72cbb.xlsx]

## Sheet: Sheet1
	Frequency	Concatinate	Leucine	Serine	Isoleucine	Valine	Glycine	Phenylalanine	Tyrosine	Aspartice acid	Aspargine	Histidine	Cystetine	Argenine	Threonine	Alanine	Methionine	Glutamic acid	Lysine	Glutamine	Proline	Tryptophan
P(323)	0.9896935933147633	L:0.9892160764027059 , H:3.979307600477517e-05 , F:0.00043772383605252685	0.9892160764027059	0.0	0.0	0.0	0.0	0.0	0.0	0.0	0.0	3.979307600477517e-05	0.00043772383605252685	0.0	0.0	0.0	0.0	0.0	0.0	0.0	0.0	0.0
P(227)	0.019299641862315958	L:0.019060883406287307 , S:0.00019896538002387584 , T:3.979307600477517e-05	0.019060883406287307	0.0	0.0	0.00019896538002387584	0.0	0.0	0.0	0.0	0.0	0.0	0.0	0.0	3.979307600477517e-05	0.0	0.0	0.0	0.0	0.0	0.0	0.0
K(91)	0.006327099084759252	R:0.004218066056506168 , N:0.0015519299641862316 , T:0.0002785515320334262 , E:0.0002785515320334262	0.0	0.0	0.0	0.0	0.0	0.0	0.0	0.004218066056506168	0.0015519299641862316	0.0	0.0	0.0	0.0002785515320334262	0.0	0.0	0.0002785515320334262	0.0	0.0	0.0	0.0
I(548)	0.005372065260644648	V:0.005372065260644648	0.0	0.0	0.005372065260644648	0.0	0.0	0.0	0.0	0.0	0.0	0.0	0.0	0.0	0.0	0.0	0.0	0.0	0.0	0.0	0.0	0.0
A(185)	0.004655789892558695	V:0.0006764822920811779 , S:0.0038997214484679664 , T:7.958615200955034e-05	0.0	0.0	0.0006764822920811779	0.0038997214484679664	0.0	0.0	0.0	0.0	0.0	0.0	0.0	0.0	7.958615200955034e-05	0.0	0.0	0.0	0.0	0.0	0.0	0.0
Y(831)	0.004496617588539594	C:0.004456824512534819 , H:3.979307600477517e-05	0.0	0.0	0.0	0.0	0.004456824512534819	0.0	0.0	0.0	0.0	3.979307600477517e-05	0.0	0.0	0.0	0.0	0.0	0.0	0.0	0.0	0.0	0.0
V(776)	0.0038997214484679664	L:0.0038997214484679664	0.0038997214484679664	0.0	0.0	0.0	0.0	0.0	0.0	0.0	0.0	0.0	0.0	0.0	0.0	0.0	0.0	0.0	0.0	0.0	0.0	0.0
A(526)	0.0036609629924393154	V:0.0031834460803820135 , S:0.000477516912057302	0.0	0.0	0.0031834460803820135	0.000477516912057302	0.0	0.0	0.0	0.0	0.0	0.0	0.0	0.0	0.0	0.0	0.0	0.0	0.0	0.0	0.0	0.0
T(225)	0.0036211699164345403	I:3.979307600477517e-05 , A:0.00354158376442499 , N:3.979307600477517e-05	0.0	3.979307600477517e-05	0.0	0.0	0.0	0.0	0.00354158376442499	0.0	3.979307600477517e-05	0.0	0.0	0.0	0.0	0.0	0.0	0.0	0.0	0.0	0.0	0.0
H(613)	0.003302825308396339	Y:0.003302825308396339	0.0	0.0	0.0	0.0	0.0	0.003302825308396339	0.0	0.0	0.0	0.0	0.0	0.0	0.0	0.0	0.0	0.0	0.0	0.0	0.0	0.0
P(918)	0.0031436530043772383	L:0.003103859928372463 , S:3.979307600477517e-05	0.003103859928372463	0.0	0.0	3.979307600477517e-05	0.0	0.0	0.0	0.0	0.0	0.0	0.0	0.0	0.0	0.0	0.0	0.0	0.0	0.0	0.0	0.0
S(647)	0.0022682053322721847	I:0.0021488261042578592 , G:0.0001193792280143255	0.0	0.0021488261042578592	0.0	0.0	0.0	0.0	0.0	0.0	0.0	0.0	0.0	0.0001193792280143255	0.0	0.0	0.0	0.0	0.0	0.0	0.0	0.0
N(743)	0.0021886191802626344	I:0.0021886191802626344	0.0	0.0021886191802626344	0.0	0.0	0.0	0.0	0.0	0.0	0.0	0.0	0.0	0.0	0.0	0.0	0.0	0.0	0.0	0.0	0.0	0.0
N(734)	0.0021488261042578592	S:3.979307600477517e-05 , T:0.000716275368085953 , D:0.001392757660167131	0.0	0.0	0.0	3.979307600477517e-05	0.0	0.0	0.0	0.0	0.0	0.0	0.0	0.0	0.000716275368085953	0.001392757660167131	0.0	0.0	0.0	0.0	0.0	0.0
Y(719)	0.0019498607242339832	C:0.0019498607242339832	0.0	0.0	0.0	0.0	0.0019498607242339832	0.0	0.0	0.0	0.0	0.0	0.0	0.0	0.0	0.0	0.0	0.0	0.0	0.0	0.0	0.0
T(806)	0.0017508953442101074	I:0.001671309192200557 , A:3.979307600477517e-05 , N:3.979307600477517e-05	0.0	0.001671309192200557	0.0	0.0	0.0	0.0	3.979307600477517e-05	0.0	3.979307600477517e-05	0.0	0.0	0.0	0.0	0.0	0.0	0.0	0.0	0.0	0.0	0.0
Q(822)	0.0017111022682053322	H:0.0017111022682053322	0.0	0.0	0.0	0.0	0.0	0.0	0.0	0.0	0.0	0.0017111022682053322	0.0	0.0	0.0	0.0	0.0	0.0	0.0	0.0	0.0	0.0
S(6)	0.0015121368881814564	L:0.001392757660167131 , P:7.958615200955034e-05 , W:3.979307600477517e-05	0.001392757660167131	0.0	0.0	0.0	0.0	0.0	0.0	0.0	0.0	0.0	0.0	0.0	0.0	0.0	0.0	0.0	0.0	7.958615200955034e-05	0.0	3.979307600477517e-05
A(529)	0.0014723438121766812	V:0.001193792280143255 , S:7.958615200955034e-05 , T:0.00019896538002387584	0.0	0.0	0.001193792280143255	7.958615200955034e-05	0.0	0.0	0.0	0.0	0.0	0.0	0.0	0.0	0.00019896538002387584	0.0	0.0	0.0	0.0	0.0	0.0	0.0
M(629)	0.0013529645841623558	I:0.0009152407481098289 , V:3.979307600477517e-05 , T:0.0003979307600477517	0.0	0.0009152407481098289	3.979307600477517e-05	0.0	0.0	0.0	0.0	0.0	0.0	0.0	0.0	0.0	0.0003979307600477517	0.0	0.0	0.0	0.0	0.0	0.0	0.0
S(913)	0.0013529645841623558	L:0.0013529645841623558	0.0013529645841623558	0.0	0.0	0.0	0.0	0.0	0.0	0.0	0.0	0.0	0.0	0.0	0.0	0.0	0.0	0.0	0.0	0.0	0.0	0.0
K(478)	0.0013529645841623558	N:0.0013529645841623558	0.0	0.0	0.0	0.0	0.0	0.0	0.0	0.0	0.0013529645841623558	0.0	0.0	0.0	0.0	0.0	0.0	0.0	0.0	0.0	0.0	0.0
A(383)	0.0013131715081575806	V:7.958615200955034e-05 , S:0.0012335853561480303	0.0	0.0	7.958615200955034e-05	0.0012335853561480303	0.0	0.0	0.0	0.0	0.0	0.0	0.0	0.0	0.0	0.0	0.0	0.0	0.0	0.0	0.0	0.0
Y(521)	0.0012733784321528054	C:0.0012733784321528054	0.0	0.0	0.0	0.0	0.0012733784321528054	0.0	0.0	0.0	0.0	0.0	0.0	0.0	0.0	0.0	0.0	0.0	0.0	0.0	0.0	0.0
T(26)	0.0012733784321528054	I:0.0012335853561480303 , A:3.979307600477517e-05	0.0	0.0012335853561480303	0.0	0.0	0.0	0.0	3.979307600477517e-05	0.0	0.0	0.0	0.0	0.0	0.0	0.0	0.0	0.0	0.0	0.0	0.0	0.0
Y(122)	0.001193792280143255	H:0.001193792280143255	0.0	0.0	0.0	0.0	0.0	0.0	0.0	0.0	0.0	0.001193792280143255	0.0	0.0	0.0	0.0	0.0	0.0	0.0	0.0	0.0	0.0
M(666)	0.0011142061281337048	L:3.979307600477517e-05 , I:0.0005571030640668524 , T:0.0005173099880620772	3.979307600477517e-05	0.0005571030640668524	0.0	0.0	0.0	0.0	0.0	0.0	0.0	0.0	0.0	0.0	0.0005173099880620772	0.0	0.0	0.0	0.0	0.0	0.0	0.0
D(477)	0.0011142061281337048	A:0.0011142061281337048	0.0	0.0	0.0	0.0	0.0	0.0	0.0011142061281337048	0.0	0.0	0.0	0.0	0.0	0.0	0.0	0.0	0.0	0.0	0.0	0.0	0.0
I(696)	0.0010744130521289296	T:0.0010744130521289296	0.0	0.0	0.0	0.0	0.0	0.0	0.0	0.0	0.0	0.0	0.0	0.0	0.0010744130521289296	0.0	0.0	0.0	0.0	0.0	0.0	0.0
T(591)	0.0010744130521289296	I:0.000955033824114604 , A:0.0001193792280143255	0.0	0.000955033824114604	0.0	0.0	0.0	0.0	0.0001193792280143255	0.0	0.0	0.0	0.0	0.0	0.0	0.0	0.0	0.0	0.0	0.0	0.0	0.0
T(276)	0.0009948269001193793	M:0.0009948269001193793	0.0	0.0	0.0	0.0	0.0	0.0	0.0	0.0	0.0	0.0	0.0	0.0	0.0	0.0	0.0009948269001193793	0.0	0.0	0.0	0.0	0.0
L(638)	0.0009948269001193793	F:0.0009948269001193793	0.0	0.0	0.0	0.0	0.0	0.0	0.0	0.0	0.0	0.0	0.0009948269001193793	0.0	0.0	0.0	0.0	0.0	0.0	0.0	0.0	0.0
M(463)	0.0009948269001193793	I:0.0009948269001193793	0.0	0.0009948269001193793	0.0	0.0	0.0	0.0	0.0	0.0	0.0	0.0	0.0	0.0	0.0	0.0	0.0	0.0	0.0	0.0	0.0	0.0
A(195)	0.0009948269001193793	V:0.0009152407481098289 , S:7.958615200955034e-05	0.0	0.0	0.0009152407481098289	7.958615200955034e-05	0.0	0.0	0.0	0.0	0.0	0.0	0.0	0.0	0.0	0.0	0.0	0.0	0.0	0.0	0.0	0.0
V(700)	0.000955033824114604	I:0.0009152407481098289 , A:3.979307600477517e-05	0.0	0.0009152407481098289	0.0	0.0	0.0	0.0	3.979307600477517e-05	0.0	0.0	0.0	0.0	0.0	0.0	0.0	0.0	0.0	0.0	0.0	0.0	0.0
G(671)	0.0009152407481098289	V:7.958615200955034e-05 , S:0.0007560684440907282 , C:3.979307600477517e-05 , D:3.979307600477517e-05	0.0	0.0	7.958615200955034e-05	0.0007560684440907282	3.979307600477517e-05	0.0	0.0	0.0	0.0	0.0	0.0	0.0	0.0	3.979307600477517e-05	0.0	0.0	0.0	0.0	0.0	0.0
I(201)	0.0009152407481098289	V:0.0009152407481098289	0.0	0.0	0.0009152407481098289	0.0	0.0	0.0	0.0	0.0	0.0	0.0	0.0	0.0	0.0	0.0	0.0	0.0	0.0	0.0	0.0	0.0
L(271)	0.0009152407481098289	S:0.0009152407481098289	0.0	0.0	0.0	0.0009152407481098289	0.0	0.0	0.0	0.0	0.0	0.0	0.0	0.0	0.0	0.0	0.0	0.0	0.0	0.0	0.0	0.0
T(319)	0.0008754476721050537	L:3.979307600477517e-05 , I:0.0005571030640668524 , A:0.00015917230401910068 , R:7.958615200955034e-05 , K:3.979307600477517e-05	3.979307600477517e-05	0.0005571030640668524	0.0	0.0	0.0	0.0	0.00015917230401910068	7.958615200955034e-05	0.0	0.0	0.0	0.0	0.0	0.0	0.0	0.0	3.979307600477517e-05	0.0	0.0	0.0
A(97)	0.0008356545961002785	V:0.0008356545961002785	0.0	0.0	0.0008356545961002785	0.0	0.0	0.0	0.0	0.0	0.0	0.0	0.0	0.0	0.0	0.0	0.0	0.0	0.0	0.0	0.0	0.0
K(780)	0.0008356545961002785	R:0.0008356545961002785	0.0	0.0	0.0	0.0	0.0	0.0	0.0	0.0008356545961002785	0.0	0.0	0.0	0.0	0.0	0.0	0.0	0.0	0.0	0.0	0.0	0.0
M(124)	0.0007958615200955034	I:0.0007958615200955034	0.0	0.0007958615200955034	0.0	0.0	0.0	0.0	0.0	0.0	0.0	0.0	0.0	0.0	0.0	0.0	0.0	0.0	0.0	0.0	0.0	0.0
T(293)	0.0007958615200955034	I:0.0007958615200955034	0.0	0.0007958615200955034	0.0	0.0	0.0	0.0	0.0	0.0	0.0	0.0	0.0	0.0	0.0	0.0	0.0	0.0	0.0	0.0	0.0	0.0
T(739)	0.0007958615200955034	I:0.0007958615200955034	0.0	0.0007958615200955034	0.0	0.0	0.0	0.0	0.0	0.0	0.0	0.0	0.0	0.0	0.0	0.0	0.0	0.0	0.0	0.0	0.0	0.0
G(345)	0.0007958615200955034	V:0.00019896538002387584 , R:0.0001193792280143255 , E:0.0003581376840429765 , K:0.0001193792280143255	0.0	0.0	0.00019896538002387584	0.0	0.0	0.0	0.0	0.0001193792280143255	0.0	0.0	0.0	0.0	0.0	0.0	0.0	0.0003581376840429765	0.0001193792280143255	0.0	0.0	0.0
A(176)	0.0007560684440907282	V:3.979307600477517e-05 , G:0.0006764822920811779 , T:3.979307600477517e-05	0.0	0.0	3.979307600477517e-05	0.0	0.0	0.0	0.0	0.0	0.0	0.0	0.0	0.0006764822920811779	3.979307600477517e-05	0.0	0.0	0.0	0.0	0.0	0.0	0.0
T(248)	0.0007560684440907282	I:0.0007560684440907282	0.0	0.0007560684440907282	0.0	0.0	0.0	0.0	0.0	0.0	0.0	0.0	0.0	0.0	0.0	0.0	0.0	0.0	0.0	0.0	0.0	0.0
T(51)	0.0007560684440907282	I:0.0001193792280143255 , S:3.979307600477517e-05 , N:0.0005968961400716276	0.0	0.0001193792280143255	0.0	3.979307600477517e-05	0.0	0.0	0.0	0.0	0.0005968961400716276	0.0	0.0	0.0	0.0	0.0	0.0	0.0	0.0	0.0	0.0	0.0
V(473)	0.000716275368085953	I:3.979307600477517e-05 , F:0.0006764822920811779	0.0	3.979307600477517e-05	0.0	0.0	0.0	0.0	0.0	0.0	0.0	0.0	0.0006764822920811779	0.0	0.0	0.0	0.0	0.0	0.0	0.0	0.0	0.0
V(354)	0.000716275368085953	L:0.00043772383605252685 , A:0.00019896538002387584 , G:7.958615200955034e-05	0.00043772383605252685	0.0	0.0	0.0	0.0	0.0	0.00019896538002387584	0.0	0.0	0.0	0.0	7.958615200955034e-05	0.0	0.0	0.0	0.0	0.0	0.0	0.0	0.0
E(744)	0.000716275368085953	A:0.0001193792280143255 , G:3.979307600477517e-05 , D:0.0005571030640668524	0.0	0.0	0.0	0.0	0.0	0.0	0.0001193792280143255	0.0	0.0	0.0	0.0	3.979307600477517e-05	0.0	0.0005571030640668524	0.0	0.0	0.0	0.0	0.0	0.0
R(249)	0.000716275368085953	T:3.979307600477517e-05 , M:7.958615200955034e-05 , K:0.0005571030640668524 , W:3.979307600477517e-05	0.0	0.0	0.0	0.0	0.0	0.0	0.0	0.0	0.0	0.0	0.0	0.0	3.979307600477517e-05	0.0	7.958615200955034e-05	0.0	0.0005571030640668524	0.0	0.0	3.979307600477517e-05
Y(38)	0.0006764822920811779	H:0.0006764822920811779	0.0	0.0	0.0	0.0	0.0	0.0	0.0	0.0	0.0	0.0006764822920811779	0.0	0.0	0.0	0.0	0.0	0.0	0.0	0.0	0.0	0.0
T(394)	0.0006764822920811779	A:3.979307600477517e-05 , M:0.0006366892160764027	0.0	0.0	0.0	0.0	0.0	0.0	3.979307600477517e-05	0.0	0.0	0.0	0.0	0.0	0.0	0.0	0.0006366892160764027	0.0	0.0	0.0	0.0	0.0
D(62)	0.0006764822920811779	L:3.979307600477517e-05 , Y:0.0006366892160764027	3.979307600477517e-05	0.0	0.0	0.0	0.0	0.0006366892160764027	0.0	0.0	0.0	0.0	0.0	0.0	0.0	0.0	0.0	0.0	0.0	0.0	0.0	0.0
D(40)	0.0006764822920811779	G:0.0006764822920811779	0.0	0.0	0.0	0.0	0.0	0.0	0.0	0.0	0.0	0.0	0.0	0.0006764822920811779	0.0	0.0	0.0	0.0	0.0	0.0	0.0	0.0
D(153)	0.0006366892160764027	Y:0.000477516912057302 , N:7.958615200955034e-05 , G:7.958615200955034e-05	0.0	0.0	0.0	0.0	0.0	0.000477516912057302	0.0	0.0	7.958615200955034e-05	0.0	0.0	7.958615200955034e-05	0.0	0.0	0.0	0.0	0.0	0.0	0.0	0.0
D(893)	0.0006366892160764027	Y:0.0006366892160764027	0.0	0.0	0.0	0.0	0.0	0.0006366892160764027	0.0	0.0	0.0	0.0	0.0	0.0	0.0	0.0	0.0	0.0	0.0	0.0	0.0	0.0
P(94)	0.0006366892160764027	L:0.00031834460803820136 , S:0.000238758456028651 , T:3.979307600477517e-05 , Q:3.979307600477517e-05	0.00031834460803820136	0.0	0.0	0.000238758456028651	0.0	0.0	0.0	0.0	0.0	0.0	0.0	0.0	3.979307600477517e-05	0.0	0.0	0.0	0.0	0.0	3.979307600477517e-05	0.0
T(344)	0.0005968961400716276	I:0.0002785515320334262 , V:0.00019896538002387584 , N:0.0001193792280143255	0.0	0.0002785515320334262	0.00019896538002387584	0.0	0.0	0.0	0.0	0.0	0.0001193792280143255	0.0	0.0	0.0	0.0	0.0	0.0	0.0	0.0	0.0	0.0	0.0
D(161)	0.0005968961400716276	Y:0.00015917230401910068 , N:0.00043772383605252685	0.0	0.0	0.0	0.0	0.0	0.00015917230401910068	0.0	0.0	0.00043772383605252685	0.0	0.0	0.0	0.0	0.0	0.0	0.0	0.0	0.0	0.0	0.0
V(257)	0.0005968961400716276	I:0.0001193792280143255 , F:0.000477516912057302	0.0	0.0001193792280143255	0.0	0.0	0.0	0.0	0.0	0.0	0.0	0.0	0.000477516912057302	0.0	0.0	0.0	0.0	0.0	0.0	0.0	0.0	0.0
M(196)	0.0005968961400716276	I:0.0005968961400716276	0.0	0.0005968961400716276	0.0	0.0	0.0	0.0	0.0	0.0	0.0	0.0	0.0	0.0	0.0	0.0	0.0	0.0	0.0	0.0	0.0	0.0
T(803)	0.0005571030640668524	I:0.0005571030640668524	0.0	0.0005571030640668524	0.0	0.0	0.0	0.0	0.0	0.0	0.0	0.0	0.0	0.0	0.0	0.0	0.0	0.0	0.0	0.0	0.0	0.0
A(449)	0.0005571030640668524	V:0.0003581376840429765 , S:3.979307600477517e-05 , T:0.00015917230401910068	0.0	0.0	0.0003581376840429765	3.979307600477517e-05	0.0	0.0	0.0	0.0	0.0	0.0	0.0	0.0	0.00015917230401910068	0.0	0.0	0.0	0.0	0.0	0.0	0.0
T(85)	0.0005571030640668524	I:0.0005571030640668524	0.0	0.0005571030640668524	0.0	0.0	0.0	0.0	0.0	0.0	0.0	0.0	0.0	0.0	0.0	0.0	0.0	0.0	0.0	0.0	0.0	0.0
A(16)	0.0005571030640668524	V:0.0005571030640668524	0.0	0.0	0.0005571030640668524	0.0	0.0	0.0	0.0	0.0	0.0	0.0	0.0	0.0	0.0	0.0	0.0	0.0	0.0	0.0	0.0	0.0
T(908)	0.0005173099880620772	I:0.0005173099880620772	0.0	0.0005173099880620772	0.0	0.0	0.0	0.0	0.0	0.0	0.0	0.0	0.0	0.0	0.0	0.0	0.0	0.0	0.0	0.0	0.0	0.0
L(302)	0.0005173099880620772	S:0.0005173099880620772	0.0	0.0	0.0	0.0005173099880620772	0.0	0.0	0.0	0.0	0.0	0.0	0.0	0.0	0.0	0.0	0.0	0.0	0.0	0.0	0.0	0.0
D(738)	0.0005173099880620772	Y:0.0003581376840429765 , G:7.958615200955034e-05 , E:7.958615200955034e-05	0.0	0.0	0.0	0.0	0.0	0.0003581376840429765	0.0	0.0	0.0	0.0	0.0	7.958615200955034e-05	0.0	0.0	0.0	7.958615200955034e-05	0.0	0.0	0.0	0.0
M(110)	0.000477516912057302	L:3.979307600477517e-05 , V:0.0003581376840429765 , K:7.958615200955034e-05	3.979307600477517e-05	0.0	0.0003581376840429765	0.0	0.0	0.0	0.0	0.0	0.0	0.0	0.0	0.0	0.0	0.0	0.0	0.0	7.958615200955034e-05	0.0	0.0	0.0
T(870)	0.000477516912057302	I:0.000477516912057302	0.0	0.000477516912057302	0.0	0.0	0.0	0.0	0.0	0.0	0.0	0.0	0.0	0.0	0.0	0.0	0.0	0.0	0.0	0.0	0.0	0.0
D(194)	0.000477516912057302	V:7.958615200955034e-05 , Y:0.00015917230401910068 , N:0.0001193792280143255 , G:0.0001193792280143255	0.0	0.0	7.958615200955034e-05	0.0	0.0	0.00015917230401910068	0.0	0.0	0.0001193792280143255	0.0	0.0	0.0001193792280143255	0.0	0.0	0.0	0.0	0.0	0.0	0.0	0.0
A(923)	0.000477516912057302	V:0.00031834460803820136 , S:0.00015917230401910068	0.0	0.0	0.00031834460803820136	0.00015917230401910068	0.0	0.0	0.0	0.0	0.0	0.0	0.0	0.0	0.0	0.0	0.0	0.0	0.0	0.0	0.0	0.0
R(285)	0.00043772383605252685	L:7.958615200955034e-05 , C:0.00031834460803820136 , H:3.979307600477517e-05	7.958615200955034e-05	0.0	0.0	0.0	0.00031834460803820136	0.0	0.0	0.0	0.0	3.979307600477517e-05	0.0	0.0	0.0	0.0	0.0	0.0	0.0	0.0	0.0	0.0
D(60)	0.00043772383605252685	Y:0.00019896538002387584 , N:3.979307600477517e-05 , E:0.00019896538002387584	0.0	0.0	0.0	0.0	0.0	0.00019896538002387584	0.0	0.0	3.979307600477517e-05	0.0	0.0	0.0	0.0	0.0	0.0	0.00019896538002387584	0.0	0.0	0.0	0.0
A(95)	0.00043772383605252685	V:7.958615200955034e-05 , S:0.0003581376840429765	0.0	0.0	7.958615200955034e-05	0.0003581376840429765	0.0	0.0	0.0	0.0	0.0	0.0	0.0	0.0	0.0	0.0	0.0	0.0	0.0	0.0	0.0	0.0
A(2)	0.00043772383605252685	V:0.00031834460803820136 , S:0.0001193792280143255	0.0	0.0	0.00031834460803820136	0.0001193792280143255	0.0	0.0	0.0	0.0	0.0	0.0	0.0	0.0	0.0	0.0	0.0	0.0	0.0	0.0	0.0	0.0
A(382)	0.00043772383605252685	V:0.0003581376840429765 , T:7.958615200955034e-05	0.0	0.0	0.0003581376840429765	0.0	0.0	0.0	0.0	0.0	0.0	0.0	0.0	0.0	7.958615200955034e-05	0.0	0.0	0.0	0.0	0.0	0.0	0.0
M(906)	0.00043772383605252685	I:0.00043772383605252685	0.0	0.00043772383605252685	0.0	0.0	0.0	0.0	0.0	0.0	0.0	0.0	0.0	0.0	0.0	0.0	0.0	0.0	0.0	0.0	0.0	0.0
M(601)	0.0003979307600477517	I:0.0003979307600477517	0.0	0.0003979307600477517	0.0	0.0	0.0	0.0	0.0	0.0	0.0	0.0	0.0	0.0	0.0	0.0	0.0	0.0	0.0	0.0	0.0	0.0
A(706)	0.0003979307600477517	V:3.979307600477517e-05 , S:0.00015917230401910068 , T:7.958615200955034e-05 , P:0.0001193792280143255	0.0	0.0	3.979307600477517e-05	0.00015917230401910068	0.0	0.0	0.0	0.0	0.0	0.0	0.0	0.0	7.958615200955034e-05	0.0	0.0	0.0	0.0	0.0001193792280143255	0.0	0.0
D(155)	0.0003979307600477517	Y:0.0001193792280143255 , G:0.0002785515320334262	0.0	0.0	0.0	0.0	0.0	0.0001193792280143255	0.0	0.0	0.0	0.0	0.0	0.0002785515320334262	0.0	0.0	0.0	0.0	0.0	0.0	0.0	0.0
Y(80)	0.0003979307600477517	H:0.0003979307600477517	0.0	0.0	0.0	0.0	0.0	0.0	0.0	0.0	0.0	0.0003979307600477517	0.0	0.0	0.0	0.0	0.0	0.0	0.0	0.0	0.0	0.0
D(910)	0.0003581376840429765	G:0.0003581376840429765	0.0	0.0	0.0	0.0	0.0	0.0	0.0	0.0	0.0	0.0	0.0	0.0003581376840429765	0.0	0.0	0.0	0.0	0.0	0.0	0.0	0.0
A(656)	0.0003581376840429765	V:7.958615200955034e-05 , S:0.0002785515320334262	0.0	0.0	7.958615200955034e-05	0.0002785515320334262	0.0	0.0	0.0	0.0	0.0	0.0	0.0	0.0	0.0	0.0	0.0	0.0	0.0	0.0	0.0	0.0
G(108)	0.0003581376840429765	V:7.958615200955034e-05 , S:3.979307600477517e-05 , C:0.000238758456028651	0.0	0.0	7.958615200955034e-05	3.979307600477517e-05	0.000238758456028651	0.0	0.0	0.0	0.0	0.0	0.0	0.0	0.0	0.0	0.0	0.0	0.0	0.0	0.0	0.0
D(63)	0.0003581376840429765	Y:0.0002785515320334262 , E:7.958615200955034e-05	0.0	0.0	0.0	0.0	0.0	0.0002785515320334262	0.0	0.0	0.0	0.0	0.0	0.0	0.0	0.0	0.0	7.958615200955034e-05	0.0	0.0	0.0	0.0
H(928)	0.0003581376840429765	Y:0.000238758456028651 , R:3.979307600477517e-05 , Q:7.958615200955034e-05	0.0	0.0	0.0	0.0	0.0	0.000238758456028651	0.0	3.979307600477517e-05	0.0	0.0	0.0	0.0	0.0	0.0	0.0	0.0	0.0	0.0	7.958615200955034e-05	0.0
D(140)	0.0003581376840429765	Y:0.000238758456028651 , A:3.979307600477517e-05 , G:7.958615200955034e-05	0.0	0.0	0.0	0.0	0.0	0.000238758456028651	3.979307600477517e-05	0.0	0.0	0.0	0.0	7.958615200955034e-05	0.0	0.0	0.0	0.0	0.0	0.0	0.0	0.0
T(141)	0.0003581376840429765	I:0.0003581376840429765	0.0	0.0003581376840429765	0.0	0.0	0.0	0.0	0.0	0.0	0.0	0.0	0.0	0.0	0.0	0.0	0.0	0.0	0.0	0.0	0.0	0.0
L(707)	0.0003581376840429765	I:0.0002785515320334262 , V:3.979307600477517e-05 , F:3.979307600477517e-05	0.0	0.0002785515320334262	3.979307600477517e-05	0.0	0.0	0.0	0.0	0.0	0.0	0.0	3.979307600477517e-05	0.0	0.0	0.0	0.0	0.0	0.0	0.0	0.0	0.0
G(823)	0.00031834460803820136	V:7.958615200955034e-05 , C:0.00015917230401910068 , D:7.958615200955034e-05	0.0	0.0	7.958615200955034e-05	0.0	0.00015917230401910068	0.0	0.0	0.0	0.0	0.0	0.0	0.0	0.0	7.958615200955034e-05	0.0	0.0	0.0	0.0	0.0	0.0
Q(875)	0.00031834460803820136	H:0.00015917230401910068 , K:0.00015917230401910068	0.0	0.0	0.0	0.0	0.0	0.0	0.0	0.0	0.0	0.00015917230401910068	0.0	0.0	0.0	0.0	0.0	0.0	0.00015917230401910068	0.0	0.0	0.0
D(284)	0.00031834460803820136	Y:3.979307600477517e-05 , N:0.0002785515320334262	0.0	0.0	0.0	0.0	0.0	3.979307600477517e-05	0.0	0.0	0.0002785515320334262	0.0	0.0	0.0	0.0	0.0	0.0	0.0	0.0	0.0	0.0	0.0
V(182)	0.00031834460803820136	I:0.0002785515320334262 , A:3.979307600477517e-05	0.0	0.0002785515320334262	0.0	0.0	0.0	0.0	3.979307600477517e-05	0.0	0.0	0.0	0.0	0.0	0.0	0.0	0.0	0.0	0.0	0.0	0.0	0.0
D(92)	0.00031834460803820136	A:3.979307600477517e-05 , N:7.958615200955034e-05 , G:0.00015917230401910068 , E:3.979307600477517e-05	0.0	0.0	0.0	0.0	0.0	0.0	3.979307600477517e-05	0.0	7.958615200955034e-05	0.0	0.0	0.00015917230401910068	0.0	0.0	0.0	3.979307600477517e-05	0.0	0.0	0.0	0.0
G(179)	0.00031834460803820136	S:7.958615200955034e-05 , C:0.000238758456028651	0.0	0.0	0.0	7.958615200955034e-05	0.000238758456028651	0.0	0.0	0.0	0.0	0.0	0.0	0.0	0.0	0.0	0.0	0.0	0.0	0.0	0.0	0.0
L(829)	0.00031834460803820136	I:3.979307600477517e-05 , F:0.0002785515320334262	0.0	3.979307600477517e-05	0.0	0.0	0.0	0.0	0.0	0.0	0.0	0.0	0.0002785515320334262	0.0	0.0	0.0	0.0	0.0	0.0	0.0	0.0	0.0
V(848)	0.00031834460803820136	L:0.00015917230401910068 , I:0.00015917230401910068	0.00015917230401910068	0.00015917230401910068	0.0	0.0	0.0	0.0	0.0	0.0	0.0	0.0	0.0	0.0	0.0	0.0	0.0	0.0	0.0	0.0	0.0	0.0
P(232)	0.00031834460803820136	S:0.00031834460803820136	0.0	0.0	0.0	0.00031834460803820136	0.0	0.0	0.0	0.0	0.0	0.0	0.0	0.0	0.0	0.0	0.0	0.0	0.0	0.0	0.0	0.0
L(388)	0.00031834460803820136	I:7.958615200955034e-05 , F:0.000238758456028651	0.0	7.958615200955034e-05	0.0	0.0	0.0	0.0	0.0	0.0	0.0	0.0	0.000238758456028651	0.0	0.0	0.0	0.0	0.0	0.0	0.0	0.0	0.0
T(262)	0.00031834460803820136	I:7.958615200955034e-05 , A:7.958615200955034e-05 , R:0.0001193792280143255 , K:3.979307600477517e-05	0.0	7.958615200955034e-05	0.0	0.0	0.0	0.0	7.958615200955034e-05	0.0001193792280143255	0.0	0.0	0.0	0.0	0.0	0.0	0.0	0.0	3.979307600477517e-05	0.0	0.0	0.0
P(169)	0.00031834460803820136	S:3.979307600477517e-05 , A:0.0002785515320334262	0.0	0.0	0.0	3.979307600477517e-05	0.0	0.0	0.0002785515320334262	0.0	0.0	0.0	0.0	0.0	0.0	0.0	0.0	0.0	0.0	0.0	0.0	0.0
D(154)	0.00031834460803820136	G:0.00031834460803820136	0.0	0.0	0.0	0.0	0.0	0.0	0.0	0.0	0.0	0.0	0.0	0.00031834460803820136	0.0	0.0	0.0	0.0	0.0	0.0	0.0	0.0
V(588)	0.00031834460803820136	L:0.00031834460803820136	0.00031834460803820136	0.0	0.0	0.0	0.0	0.0	0.0	0.0	0.0	0.0	0.0	0.0	0.0	0.0	0.0	0.0	0.0	0.0	0.0	0.0
H(82)	0.0002785515320334262	Y:0.000238758456028651 , R:3.979307600477517e-05	0.0	0.0	0.0	0.0	0.0	0.000238758456028651	0.0	3.979307600477517e-05	0.0	0.0	0.0	0.0	0.0	0.0	0.0	0.0	0.0	0.0	0.0	0.0
N(88)	0.0002785515320334262	S:0.0002785515320334262	0.0	0.0	0.0	0.0002785515320334262	0.0	0.0	0.0	0.0	0.0	0.0	0.0	0.0	0.0	0.0	0.0	0.0	0.0	0.0	0.0	0.0
G(385)	0.0002785515320334262	S:0.0002785515320334262	0.0	0.0	0.0	0.0002785515320334262	0.0	0.0	0.0	0.0	0.0	0.0	0.0	0.0	0.0	0.0	0.0	0.0	0.0	0.0	0.0	0.0
V(234)	0.0002785515320334262	L:0.000238758456028651 , I:3.979307600477517e-05	0.000238758456028651	3.979307600477517e-05	0.0	0.0	0.0	0.0	0.0	0.0	0.0	0.0	0.0	0.0	0.0	0.0	0.0	0.0	0.0	0.0	0.0	0.0
P(21)	0.0002785515320334262	S:0.0002785515320334262	0.0	0.0	0.0	0.0002785515320334262	0.0	0.0	0.0	0.0	0.0	0.0	0.0	0.0	0.0	0.0	0.0	0.0	0.0	0.0	0.0	0.0
T(20)	0.0002785515320334262	I:7.958615200955034e-05 , A:0.00019896538002387584	0.0	7.958615200955034e-05	0.0	0.0	0.0	0.0	0.00019896538002387584	0.0	0.0	0.0	0.0	0.0	0.0	0.0	0.0	0.0	0.0	0.0	0.0	0.0
S(229)	0.0002785515320334262	I:3.979307600477517e-05 , N:7.958615200955034e-05 , G:0.00015917230401910068	0.0	3.979307600477517e-05	0.0	0.0	0.0	0.0	0.0	0.0	7.958615200955034e-05	0.0	0.0	0.00015917230401910068	0.0	0.0	0.0	0.0	0.0	0.0	0.0	0.0
L(636)	0.0002785515320334262	I:7.958615200955034e-05 , F:0.00019896538002387584	0.0	7.958615200955034e-05	0.0	0.0	0.0	0.0	0.0	0.0	0.0	0.0	0.00019896538002387584	0.0	0.0	0.0	0.0	0.0	0.0	0.0	0.0	0.0
T(604)	0.0002785515320334262	I:0.0002785515320334262	0.0	0.0002785515320334262	0.0	0.0	0.0	0.0	0.0	0.0	0.0	0.0	0.0	0.0	0.0	0.0	0.0	0.0	0.0	0.0	0.0	0.0
A(250)	0.0002785515320334262	V:0.0002785515320334262	0.0	0.0	0.0002785515320334262	0.0	0.0	0.0	0.0	0.0	0.0	0.0	0.0	0.0	0.0	0.0	0.0	0.0	0.0	0.0	0.0	0.0
D(879)	0.0002785515320334262	Y:0.00015917230401910068 , A:3.979307600477517e-05 , G:7.958615200955034e-05	0.0	0.0	0.0	0.0	0.0	0.00015917230401910068	3.979307600477517e-05	0.0	0.0	0.0	0.0	7.958615200955034e-05	0.0	0.0	0.0	0.0	0.0	0.0	0.0	0.0
S(68)	0.0002785515320334262	A:3.979307600477517e-05 , F:0.000238758456028651	0.0	0.0	0.0	0.0	0.0	0.0	3.979307600477517e-05	0.0	0.0	0.0	0.000238758456028651	0.0	0.0	0.0	0.0	0.0	0.0	0.0	0.0	0.0
T(226)	0.000238758456028651	A:3.979307600477517e-05 , M:0.00019896538002387584	0.0	0.0	0.0	0.0	0.0	0.0	3.979307600477517e-05	0.0	0.0	0.0	0.0	0.0	0.0	0.0	0.00019896538002387584	0.0	0.0	0.0	0.0	0.0
A(716)	0.000238758456028651	V:0.00015917230401910068 , T:7.958615200955034e-05	0.0	0.0	0.00015917230401910068	0.0	0.0	0.0	0.0	0.0	0.0	0.0	0.0	0.0	7.958615200955034e-05	0.0	0.0	0.0	0.0	0.0	0.0	0.0
A(4)	0.000238758456028651	V:0.000238758456028651	0.0	0.0	0.000238758456028651	0.0	0.0	0.0	0.0	0.0	0.0	0.0	0.0	0.0	0.0	0.0	0.0	0.0	0.0	0.0	0.0	0.0
D(258)	0.000238758456028651	Y:7.958615200955034e-05 , G:0.00015917230401910068	0.0	0.0	0.0	0.0	0.0	7.958615200955034e-05	0.0	0.0	0.0	0.0	0.0	0.00015917230401910068	0.0	0.0	0.0	0.0	0.0	0.0	0.0	0.0
I(171)	0.000238758456028651	V:0.00019896538002387584 , M:3.979307600477517e-05	0.0	0.0	0.00019896538002387584	0.0	0.0	0.0	0.0	0.0	0.0	0.0	0.0	0.0	0.0	0.0	3.979307600477517e-05	0.0	0.0	0.0	0.0	0.0
T(643)	0.000238758456028651	I:0.000238758456028651	0.0	0.000238758456028651	0.0	0.0	0.0	0.0	0.0	0.0	0.0	0.0	0.0	0.0	0.0	0.0	0.0	0.0	0.0	0.0	0.0	0.0
Q(184)	0.000238758456028651	R:0.0001193792280143255 , K:0.0001193792280143255	0.0	0.0	0.0	0.0	0.0	0.0	0.0	0.0001193792280143255	0.0	0.0	0.0	0.0	0.0	0.0	0.0	0.0	0.0001193792280143255	0.0	0.0	0.0
Y(346)	0.000238758456028651	H:0.000238758456028651	0.0	0.0	0.0	0.0	0.0	0.0	0.0	0.0	0.0	0.000238758456028651	0.0	0.0	0.0	0.0	0.0	0.0	0.0	0.0	0.0	0.0
S(607)	0.000238758456028651	I:0.00015917230401910068 , N:7.958615200955034e-05	0.0	0.00015917230401910068	0.0	0.0	0.0	0.0	0.0	0.0	7.958615200955034e-05	0.0	0.0	0.0	0.0	0.0	0.0	0.0	0.0	0.0	0.0	0.0
D(109)	0.000238758456028651	H:7.958615200955034e-05 , G:0.00015917230401910068	0.0	0.0	0.0	0.0	0.0	0.0	0.0	0.0	0.0	7.958615200955034e-05	0.0	0.00015917230401910068	0.0	0.0	0.0	0.0	0.0	0.0	0.0	0.0
D(170)	0.000238758456028651	Y:0.00015917230401910068 , G:7.958615200955034e-05	0.0	0.0	0.0	0.0	0.0	0.00015917230401910068	0.0	0.0	0.0	0.0	0.0	7.958615200955034e-05	0.0	0.0	0.0	0.0	0.0	0.0	0.0	0.0
A(585)	0.000238758456028651	V:7.958615200955034e-05 , S:3.979307600477517e-05 , T:7.958615200955034e-05 , D:3.979307600477517e-05	0.0	0.0	7.958615200955034e-05	3.979307600477517e-05	0.0	0.0	0.0	0.0	0.0	0.0	0.0	0.0	7.958615200955034e-05	3.979307600477517e-05	0.0	0.0	0.0	0.0	0.0	0.0
P(461)	0.000238758456028651	S:0.00015917230401910068 , A:7.958615200955034e-05	0.0	0.0	0.0	0.00015917230401910068	0.0	0.0	7.958615200955034e-05	0.0	0.0	0.0	0.0	0.0	0.0	0.0	0.0	0.0	0.0	0.0	0.0	0.0
K(59)	0.000238758456028651	N:0.00019896538002387584 , E:3.979307600477517e-05	0.0	0.0	0.0	0.0	0.0	0.0	0.0	0.0	0.00019896538002387584	0.0	0.0	0.0	0.0	0.0	0.0	3.979307600477517e-05	0.0	0.0	0.0	0.0
T(148)	0.000238758456028651	I:0.00019896538002387584 , A:3.979307600477517e-05	0.0	0.00019896538002387584	0.0	0.0	0.0	0.0	3.979307600477517e-05	0.0	0.0	0.0	0.0	0.0	0.0	0.0	0.0	0.0	0.0	0.0	0.0	0.0
V(353)	0.00019896538002387584	I:0.00015917230401910068 , D:3.979307600477517e-05	0.0	0.00015917230401910068	0.0	0.0	0.0	0.0	0.0	0.0	0.0	0.0	0.0	0.0	0.0	3.979307600477517e-05	0.0	0.0	0.0	0.0	0.0	0.0
S(772)	0.00019896538002387584	Y:0.0001193792280143255 , A:7.958615200955034e-05	0.0	0.0	0.0	0.0	0.0	0.0001193792280143255	7.958615200955034e-05	0.0	0.0	0.0	0.0	0.0	0.0	0.0	0.0	0.0	0.0	0.0	0.0	0.0
V(299)	0.00019896538002387584	A:3.979307600477517e-05 , F:0.00015917230401910068	0.0	0.0	0.0	0.0	0.0	0.0	3.979307600477517e-05	0.0	0.0	0.0	0.00015917230401910068	0.0	0.0	0.0	0.0	0.0	0.0	0.0	0.0	0.0
P(264)	0.00019896538002387584	S:0.00019896538002387584	0.0	0.0	0.0	0.00019896538002387584	0.0	0.0	0.0	0.0	0.0	0.0	0.0	0.0	0.0	0.0	0.0	0.0	0.0	0.0	0.0	0.0
E(729)	0.00019896538002387584	D:0.00019896538002387584	0.0	0.0	0.0	0.0	0.0	0.0	0.0	0.0	0.0	0.0	0.0	0.0	0.0	0.00019896538002387584	0.0	0.0	0.0	0.0	0.0	0.0
D(303)	0.00019896538002387584	N:3.979307600477517e-05 , G:7.958615200955034e-05 , E:7.958615200955034e-05	0.0	0.0	0.0	0.0	0.0	0.0	0.0	0.0	3.979307600477517e-05	0.0	0.0	7.958615200955034e-05	0.0	0.0	0.0	7.958615200955034e-05	0.0	0.0	0.0	0.0
R(750)	0.00019896538002387584	C:0.0001193792280143255 , H:7.958615200955034e-05	0.0	0.0	0.0	0.0	0.0001193792280143255	0.0	0.0	0.0	0.0	7.958615200955034e-05	0.0	0.0	0.0	0.0	0.0	0.0	0.0	0.0	0.0	0.0
V(330)	0.00019896538002387584	L:0.00019896538002387584	0.00019896538002387584	0.0	0.0	0.0	0.0	0.0	0.0	0.0	0.0	0.0	0.0	0.0	0.0	0.0	0.0	0.0	0.0	0.0	0.0	0.0
A(311)	0.00019896538002387584	S:0.00015917230401910068 , T:3.979307600477517e-05	0.0	0.0	0.0	0.00015917230401910068	0.0	0.0	0.0	0.0	0.0	0.0	0.0	0.0	3.979307600477517e-05	0.0	0.0	0.0	0.0	0.0	0.0	0.0
L(247)	0.00019896538002387584	S:3.979307600477517e-05 , F:0.00015917230401910068	0.0	0.0	0.0	3.979307600477517e-05	0.0	0.0	0.0	0.0	0.0	0.0	0.00015917230401910068	0.0	0.0	0.0	0.0	0.0	0.0	0.0	0.0	0.0
D(107)	0.00019896538002387584	Y:0.00015917230401910068 , G:3.979307600477517e-05	0.0	0.0	0.0	0.0	0.0	0.00015917230401910068	0.0	0.0	0.0	0.0	0.0	3.979307600477517e-05	0.0	0.0	0.0	0.0	0.0	0.0	0.0	0.0
E(876)	0.00019896538002387584	G:3.979307600477517e-05 , D:0.00015917230401910068	0.0	0.0	0.0	0.0	0.0	0.0	0.0	0.0	0.0	0.0	0.0	3.979307600477517e-05	0.0	0.00015917230401910068	0.0	0.0	0.0	0.0	0.0	0.0
L(514)	0.00019896538002387584	F:0.00019896538002387584	0.0	0.0	0.0	0.0	0.0	0.0	0.0	0.0	0.0	0.0	0.00019896538002387584	0.0	0.0	0.0	0.0	0.0	0.0	0.0	0.0	0.0
Q(357)	0.00019896538002387584	H:0.00019896538002387584	0.0	0.0	0.0	0.0	0.0	0.0	0.0	0.0	0.0	0.00019896538002387584	0.0	0.0	0.0	0.0	0.0	0.0	0.0	0.0	0.0	0.0
D(481)	0.00019896538002387584	G:0.00019896538002387584	0.0	0.0	0.0	0.0	0.0	0.0	0.0	0.0	0.0	0.0	0.0	0.00019896538002387584	0.0	0.0	0.0	0.0	0.0	0.0	0.0	0.0
I(536)	0.00019896538002387584	V:3.979307600477517e-05 , T:0.00015917230401910068	0.0	0.0	3.979307600477517e-05	0.0	0.0	0.0	0.0	0.0	0.0	0.0	0.0	0.0	0.00015917230401910068	0.0	0.0	0.0	0.0	0.0	0.0	0.0
V(315)	0.00019896538002387584	G:0.00019896538002387584	0.0	0.0	0.0	0.0	0.0	0.0	0.0	0.0	0.0	0.0	0.0	0.00019896538002387584	0.0	0.0	0.0	0.0	0.0	0.0	0.0	0.0
I(86)	0.00019896538002387584	L:0.0001193792280143255 , V:3.979307600477517e-05 , T:3.979307600477517e-05	0.0001193792280143255	0.0	3.979307600477517e-05	0.0	0.0	0.0	0.0	0.0	0.0	0.0	0.0	0.0	3.979307600477517e-05	0.0	0.0	0.0	0.0	0.0	0.0	0.0
D(445)	0.00019896538002387584	N:7.958615200955034e-05 , G:0.0001193792280143255	0.0	0.0	0.0	0.0	0.0	0.0	0.0	0.0	7.958615200955034e-05	0.0	0.0	0.0001193792280143255	0.0	0.0	0.0	0.0	0.0	0.0	0.0	0.0
R(173)	0.00019896538002387584	C:0.00015917230401910068 , H:3.979307600477517e-05	0.0	0.0	0.0	0.0	0.00015917230401910068	0.0	0.0	0.0	0.0	3.979307600477517e-05	0.0	0.0	0.0	0.0	0.0	0.0	0.0	0.0	0.0	0.0
P(112)	0.00019896538002387584	S:0.00019896538002387584	0.0	0.0	0.0	0.00019896538002387584	0.0	0.0	0.0	0.0	0.0	0.0	0.0	0.0	0.0	0.0	0.0	0.0	0.0	0.0	0.0	0.0
S(434)	0.00019896538002387584	F:0.00015917230401910068 , P:3.979307600477517e-05	0.0	0.0	0.0	0.0	0.0	0.0	0.0	0.0	0.0	0.0	0.00015917230401910068	0.0	0.0	0.0	0.0	0.0	0.0	3.979307600477517e-05	0.0	0.0
Q(81)	0.00019896538002387584	L:3.979307600477517e-05 , H:0.00015917230401910068	3.979307600477517e-05	0.0	0.0	0.0	0.0	0.0	0.0	0.0	0.0	0.00015917230401910068	0.0	0.0	0.0	0.0	0.0	0.0	0.0	0.0	0.0	0.0
A(554)	0.00019896538002387584	V:0.00015917230401910068 , T:3.979307600477517e-05	0.0	0.0	0.00015917230401910068	0.0	0.0	0.0	0.0	0.0	0.0	0.0	0.0	0.0	3.979307600477517e-05	0.0	0.0	0.0	0.0	0.0	0.0	0.0
K(718)	0.00019896538002387584	N:0.0001193792280143255 , T:7.958615200955034e-05	0.0	0.0	0.0	0.0	0.0	0.0	0.0	0.0	0.0001193792280143255	0.0	0.0	0.0	7.958615200955034e-05	0.0	0.0	0.0	0.0	0.0	0.0	0.0
A(43)	0.00019896538002387584	V:7.958615200955034e-05 , S:0.0001193792280143255	0.0	0.0	7.958615200955034e-05	0.0001193792280143255	0.0	0.0	0.0	0.0	0.0	0.0	0.0	0.0	0.0	0.0	0.0	0.0	0.0	0.0	0.0	0.0
A(625)	0.00019896538002387584	S:0.00015917230401910068 , T:3.979307600477517e-05	0.0	0.0	0.0	0.00015917230401910068	0.0	0.0	0.0	0.0	0.0	0.0	0.0	0.0	3.979307600477517e-05	0.0	0.0	0.0	0.0	0.0	0.0	0.0
R(583)	0.00015917230401910068	G:0.0001193792280143255 , K:3.979307600477517e-05	0.0	0.0	0.0	0.0	0.0	0.0	0.0	0.0	0.0	0.0	0.0	0.0001193792280143255	0.0	0.0	0.0	0.0	3.979307600477517e-05	0.0	0.0	0.0
V(587)	0.00015917230401910068	L:0.0001193792280143255 , I:3.979307600477517e-05	0.0001193792280143255	3.979307600477517e-05	0.0	0.0	0.0	0.0	0.0	0.0	0.0	0.0	0.0	0.0	0.0	0.0	0.0	0.0	0.0	0.0	0.0	0.0
Y(530)	0.00015917230401910068	H:0.00015917230401910068	0.0	0.0	0.0	0.0	0.0	0.0	0.0	0.0	0.0	0.00015917230401910068	0.0	0.0	0.0	0.0	0.0	0.0	0.0	0.0	0.0	0.0
T(644)	0.00015917230401910068	M:0.00015917230401910068	0.0	0.0	0.0	0.0	0.0	0.0	0.0	0.0	0.0	0.0	0.0	0.0	0.0	0.0	0.00015917230401910068	0.0	0.0	0.0	0.0	0.0
S(325)	0.00015917230401910068	I:7.958615200955034e-05 , G:3.979307600477517e-05 , K:3.979307600477517e-05	0.0	7.958615200955034e-05	0.0	0.0	0.0	0.0	0.0	0.0	0.0	0.0	0.0	3.979307600477517e-05	0.0	0.0	0.0	0.0	3.979307600477517e-05	0.0	0.0	0.0
D(499)	0.00015917230401910068	E:0.00015917230401910068	0.0	0.0	0.0	0.0	0.0	0.0	0.0	0.0	0.0	0.0	0.0	0.0	0.0	0.0	0.0	0.00015917230401910068	0.0	0.0	0.0	0.0
V(742)	0.00015917230401910068	M:0.00015917230401910068	0.0	0.0	0.0	0.0	0.0	0.0	0.0	0.0	0.0	0.0	0.0	0.0	0.0	0.0	0.00015917230401910068	0.0	0.0	0.0	0.0	0.0
S(520)	0.00015917230401910068	G:0.00015917230401910068	0.0	0.0	0.0	0.0	0.0	0.0	0.0	0.0	0.0	0.0	0.0	0.00015917230401910068	0.0	0.0	0.0	0.0	0.0	0.0	0.0	0.0
V(737)	0.00015917230401910068	I:3.979307600477517e-05 , F:0.0001193792280143255	0.0	3.979307600477517e-05	0.0	0.0	0.0	0.0	0.0	0.0	0.0	0.0	0.0001193792280143255	0.0	0.0	0.0	0.0	0.0	0.0	0.0	0.0	0.0
S(343)	0.00015917230401910068	L:3.979307600477517e-05 , N:3.979307600477517e-05 , T:7.958615200955034e-05	3.979307600477517e-05	0.0	0.0	0.0	0.0	0.0	0.0	0.0	3.979307600477517e-05	0.0	0.0	0.0	7.958615200955034e-05	0.0	0.0	0.0	0.0	0.0	0.0	0.0
R(457)	0.00015917230401910068	C:0.00015917230401910068	0.0	0.0	0.0	0.0	0.00015917230401910068	0.0	0.0	0.0	0.0	0.0	0.0	0.0	0.0	0.0	0.0	0.0	0.0	0.0	0.0	0.0
A(443)	0.00015917230401910068	V:0.00015917230401910068	0.0	0.0	0.00015917230401910068	0.0	0.0	0.0	0.0	0.0	0.0	0.0	0.0	0.0	0.0	0.0	0.0	0.0	0.0	0.0	0.0	0.0
A(423)	0.00015917230401910068	V:0.0001193792280143255 , S:3.979307600477517e-05	0.0	0.0	0.0001193792280143255	3.979307600477517e-05	0.0	0.0	0.0	0.0	0.0	0.0	0.0	0.0	0.0	0.0	0.0	0.0	0.0	0.0	0.0	0.0
A(699)	0.00015917230401910068	S:0.00015917230401910068	0.0	0.0	0.0	0.00015917230401910068	0.0	0.0	0.0	0.0	0.0	0.0	0.0	0.0	0.0	0.0	0.0	0.0	0.0	0.0	0.0	0.0
V(405)	0.00015917230401910068	F:0.00015917230401910068	0.0	0.0	0.0	0.0	0.0	0.0	0.0	0.0	0.0	0.0	0.00015917230401910068	0.0	0.0	0.0	0.0	0.0	0.0	0.0	0.0	0.0
A(399)	0.00015917230401910068	S:3.979307600477517e-05 , T:0.0001193792280143255	0.0	0.0	0.0	3.979307600477517e-05	0.0	0.0	0.0	0.0	0.0	0.0	0.0	0.0	0.0001193792280143255	0.0	0.0	0.0	0.0	0.0	0.0	0.0
M(380)	0.00015917230401910068	L:3.979307600477517e-05 , I:0.0001193792280143255	3.979307600477517e-05	0.0001193792280143255	0.0	0.0	0.0	0.0	0.0	0.0	0.0	0.0	0.0	0.0	0.0	0.0	0.0	0.0	0.0	0.0	0.0	0.0
A(379)	0.00015917230401910068	V:7.958615200955034e-05 , S:7.958615200955034e-05	0.0	0.0	7.958615200955034e-05	7.958615200955034e-05	0.0	0.0	0.0	0.0	0.0	0.0	0.0	0.0	0.0	0.0	0.0	0.0	0.0	0.0	0.0	0.0
H(725)	0.00015917230401910068	Y:0.00015917230401910068	0.0	0.0	0.0	0.0	0.0	0.00015917230401910068	0.0	0.0	0.0	0.0	0.0	0.0	0.0	0.0	0.0	0.0	0.0	0.0	0.0	0.0
K(783)	0.00015917230401910068	N:3.979307600477517e-05 , M:3.979307600477517e-05 , E:7.958615200955034e-05	0.0	0.0	0.0	0.0	0.0	0.0	0.0	0.0	3.979307600477517e-05	0.0	0.0	0.0	0.0	0.0	3.979307600477517e-05	7.958615200955034e-05	0.0	0.0	0.0	0.0
I(632)	0.00015917230401910068	T:0.00015917230401910068	0.0	0.0	0.0	0.0	0.0	0.0	0.0	0.0	0.0	0.0	0.0	0.0	0.00015917230401910068	0.0	0.0	0.0	0.0	0.0	0.0	0.0
N(177)	0.00015917230401910068	S:0.00015917230401910068	0.0	0.0	0.0	0.00015917230401910068	0.0	0.0	0.0	0.0	0.0	0.0	0.0	0.0	0.0	0.0	0.0	0.0	0.0	0.0	0.0	0.0
D(269)	0.00015917230401910068	N:0.0001193792280143255 , G:3.979307600477517e-05	0.0	0.0	0.0	0.0	0.0	0.0	0.0	0.0	0.0001193792280143255	0.0	0.0	3.979307600477517e-05	0.0	0.0	0.0	0.0	0.0	0.0	0.0	0.0
R(183)	0.00015917230401910068	G:0.00015917230401910068	0.0	0.0	0.0	0.0	0.0	0.0	0.0	0.0	0.0	0.0	0.0	0.00015917230401910068	0.0	0.0	0.0	0.0	0.0	0.0	0.0	0.0
R(181)	0.00015917230401910068	C:3.979307600477517e-05 , H:3.979307600477517e-05 , Q:7.958615200955034e-05	0.0	0.0	0.0	0.0	3.979307600477517e-05	0.0	0.0	0.0	0.0	3.979307600477517e-05	0.0	0.0	0.0	0.0	0.0	0.0	0.0	0.0	7.958615200955034e-05	0.0
V(174)	0.00015917230401910068	I:0.0001193792280143255 , A:3.979307600477517e-05	0.0	0.0001193792280143255	0.0	0.0	0.0	0.0	3.979307600477517e-05	0.0	0.0	0.0	0.0	0.0	0.0	0.0	0.0	0.0	0.0	0.0	0.0	0.0
N(213)	0.00015917230401910068	D:0.00015917230401910068	0.0	0.0	0.0	0.0	0.0	0.0	0.0	0.0	0.0	0.0	0.0	0.0	0.0	0.00015917230401910068	0.0	0.0	0.0	0.0	0.0	0.0
K(160)	0.00015917230401910068	R:3.979307600477517e-05 , N:3.979307600477517e-05 , E:7.958615200955034e-05	0.0	0.0	0.0	0.0	0.0	0.0	0.0	3.979307600477517e-05	3.979307600477517e-05	0.0	0.0	0.0	0.0	0.0	0.0	7.958615200955034e-05	0.0	0.0	0.0	0.0
N(150)	0.00015917230401910068	I:3.979307600477517e-05 , S:0.0001193792280143255	0.0	3.979307600477517e-05	0.0	0.0001193792280143255	0.0	0.0	0.0	0.0	0.0	0.0	0.0	0.0	0.0	0.0	0.0	0.0	0.0	0.0	0.0	0.0
M(242)	0.00015917230401910068	L:0.00015917230401910068	0.00015917230401910068	0.0	0.0	0.0	0.0	0.0	0.0	0.0	0.0	0.0	0.0	0.0	0.0	0.0	0.0	0.0	0.0	0.0	0.0	0.0
I(244)	0.00015917230401910068	T:3.979307600477517e-05 , M:0.0001193792280143255	0.0	0.0	0.0	0.0	0.0	0.0	0.0	0.0	0.0	0.0	0.0	0.0	3.979307600477517e-05	0.0	0.0001193792280143255	0.0	0.0	0.0	0.0	0.0
T(246)	0.00015917230401910068	I:0.00015917230401910068	0.0	0.00015917230401910068	0.0	0.0	0.0	0.0	0.0	0.0	0.0	0.0	0.0	0.0	0.0	0.0	0.0	0.0	0.0	0.0	0.0	0.0
V(128)	0.00015917230401910068	I:7.958615200955034e-05 , A:7.958615200955034e-05	0.0	7.958615200955034e-05	0.0	0.0	0.0	0.0	7.958615200955034e-05	0.0	0.0	0.0	0.0	0.0	0.0	0.0	0.0	0.0	0.0	0.0	0.0	0.0
K(103)	0.00015917230401910068	R:0.0001193792280143255 , N:3.979307600477517e-05	0.0	0.0	0.0	0.0	0.0	0.0	0.0	0.0001193792280143255	3.979307600477517e-05	0.0	0.0	0.0	0.0	0.0	0.0	0.0	0.0	0.0	0.0	0.0
N(781)	0.00015917230401910068	S:0.0001193792280143255 , T:3.979307600477517e-05	0.0	0.0	0.0	0.0001193792280143255	0.0	0.0	0.0	0.0	0.0	0.0	0.0	0.0	3.979307600477517e-05	0.0	0.0	0.0	0.0	0.0	0.0	0.0
H(882)	0.00015917230401910068	Y:7.958615200955034e-05 , R:7.958615200955034e-05	0.0	0.0	0.0	0.0	0.0	7.958615200955034e-05	0.0	7.958615200955034e-05	0.0	0.0	0.0	0.0	0.0	0.0	0.0	0.0	0.0	0.0	0.0	0.0
V(190)	0.00015917230401910068	I:0.0001193792280143255 , A:3.979307600477517e-05	0.0	0.0001193792280143255	0.0	0.0	0.0	0.0	3.979307600477517e-05	0.0	0.0	0.0	0.0	0.0	0.0	0.0	0.0	0.0	0.0	0.0	0.0	0.0
R(279)	0.00015917230401910068	S:0.0001193792280143255 , K:3.979307600477517e-05	0.0	0.0	0.0	0.0001193792280143255	0.0	0.0	0.0	0.0	0.0	0.0	0.0	0.0	0.0	0.0	0.0	0.0	3.979307600477517e-05	0.0	0.0	0.0
G(44)	0.00015917230401910068	V:0.00015917230401910068	0.0	0.0	0.00015917230401910068	0.0	0.0	0.0	0.0	0.0	0.0	0.0	0.0	0.0	0.0	0.0	0.0	0.0	0.0	0.0	0.0	0.0
Y(273)	0.00015917230401910068	H:0.00015917230401910068	0.0	0.0	0.0	0.0	0.0	0.0	0.0	0.0	0.0	0.00015917230401910068	0.0	0.0	0.0	0.0	0.0	0.0	0.0	0.0	0.0	0.0
T(76)	0.00015917230401910068	I:0.00015917230401910068	0.0	0.00015917230401910068	0.0	0.0	0.0	0.0	0.0	0.0	0.0	0.0	0.0	0.0	0.0	0.0	0.0	0.0	0.0	0.0	0.0	0.0
C(12)	0.00015917230401910068	S:7.958615200955034e-05 , R:7.958615200955034e-05	0.0	0.0	0.0	7.958615200955034e-05	0.0	0.0	0.0	7.958615200955034e-05	0.0	0.0	0.0	0.0	0.0	0.0	0.0	0.0	0.0	0.0	0.0	0.0
A(46)	0.00015917230401910068	S:0.0001193792280143255 , T:3.979307600477517e-05	0.0	0.0	0.0	0.0001193792280143255	0.0	0.0	0.0	0.0	0.0	0.0	0.0	0.0	3.979307600477517e-05	0.0	0.0	0.0	0.0	0.0	0.0	0.0
P(412)	0.0001193792280143255	S:0.0001193792280143255	0.0	0.0	0.0	0.0001193792280143255	0.0	0.0	0.0	0.0	0.0	0.0	0.0	0.0	0.0	0.0	0.0	0.0	0.0	0.0	0.0	0.0
D(824)	0.0001193792280143255	Y:7.958615200955034e-05 , G:3.979307600477517e-05	0.0	0.0	0.0	0.0	0.0	7.958615200955034e-05	0.0	0.0	0.0	0.0	0.0	3.979307600477517e-05	0.0	0.0	0.0	0.0	0.0	0.0	0.0	0.0
T(926)	0.0001193792280143255	I:7.958615200955034e-05 , A:3.979307600477517e-05	0.0	7.958615200955034e-05	0.0	0.0	0.0	0.0	3.979307600477517e-05	0.0	0.0	0.0	0.0	0.0	0.0	0.0	0.0	0.0	0.0	0.0	0.0	0.0
P(830)	0.0001193792280143255	L:3.979307600477517e-05 , S:7.958615200955034e-05	3.979307600477517e-05	0.0	0.0	7.958615200955034e-05	0.0	0.0	0.0	0.0	0.0	0.0	0.0	0.0	0.0	0.0	0.0	0.0	0.0	0.0	0.0	0.0
E(436)	0.0001193792280143255	G:0.0001193792280143255	0.0	0.0	0.0	0.0	0.0	0.0	0.0	0.0	0.0	0.0	0.0	0.0001193792280143255	0.0	0.0	0.0	0.0	0.0	0.0	0.0	0.0
E(922)	0.0001193792280143255	D:7.958615200955034e-05 , K:3.979307600477517e-05	0.0	0.0	0.0	0.0	0.0	0.0	0.0	0.0	0.0	0.0	0.0	0.0	0.0	7.958615200955034e-05	0.0	0.0	3.979307600477517e-05	0.0	0.0	0.0
L(838)	0.0001193792280143255	I:7.958615200955034e-05 , T:3.979307600477517e-05	0.0	7.958615200955034e-05	0.0	0.0	0.0	0.0	0.0	0.0	0.0	0.0	0.0	0.0	3.979307600477517e-05	0.0	0.0	0.0	0.0	0.0	0.0	0.0
W(162)	0.0001193792280143255	C:0.0001193792280143255	0.0	0.0	0.0	0.0	0.0001193792280143255	0.0	0.0	0.0	0.0	0.0	0.0	0.0	0.0	0.0	0.0	0.0	0.0	0.0	0.0	0.0
E(919)	0.0001193792280143255	D:0.0001193792280143255	0.0	0.0	0.0	0.0	0.0	0.0	0.0	0.0	0.0	0.0	0.0	0.0	0.0	0.0001193792280143255	0.0	0.0	0.0	0.0	0.0	0.0
N(911)	0.0001193792280143255	S:0.0001193792280143255	0.0	0.0	0.0	0.0001193792280143255	0.0	0.0	0.0	0.0	0.0	0.0	0.0	0.0	0.0	0.0	0.0	0.0	0.0	0.0	0.0	0.0
M(566)	0.0001193792280143255	I:0.0001193792280143255	0.0	0.0001193792280143255	0.0	0.0	0.0	0.0	0.0	0.0	0.0	0.0	0.0	0.0	0.0	0.0	0.0	0.0	0.0	0.0	0.0	0.0
Y(149)	0.0001193792280143255	H:0.0001193792280143255	0.0	0.0	0.0	0.0	0.0	0.0	0.0	0.0	0.0	0.0001193792280143255	0.0	0.0	0.0	0.0	0.0	0.0	0.0	0.0	0.0	0.0
T(582)	0.0001193792280143255	I:0.0001193792280143255	0.0	0.0001193792280143255	0.0	0.0	0.0	0.0	0.0	0.0	0.0	0.0	0.0	0.0	0.0	0.0	0.0	0.0	0.0	0.0	0.0	0.0
A(130)	0.0001193792280143255	S:3.979307600477517e-05 , T:7.958615200955034e-05	0.0	0.0	0.0	3.979307600477517e-05	0.0	0.0	0.0	0.0	0.0	0.0	0.0	0.0	7.958615200955034e-05	0.0	0.0	0.0	0.0	0.0	0.0	0.0
M(519)	0.0001193792280143255	I:0.0001193792280143255	0.0	0.0001193792280143255	0.0	0.0	0.0	0.0	0.0	0.0	0.0	0.0	0.0	0.0	0.0	0.0	0.0	0.0	0.0	0.0	0.0	0.0
L(648)	0.0001193792280143255	S:0.0001193792280143255	0.0	0.0	0.0	0.0001193792280143255	0.0	0.0	0.0	0.0	0.0	0.0	0.0	0.0	0.0	0.0	0.0	0.0	0.0	0.0	0.0	0.0
D(67)	0.0001193792280143255	G:0.0001193792280143255	0.0	0.0	0.0	0.0	0.0	0.0	0.0	0.0	0.0	0.0	0.0	0.0001193792280143255	0.0	0.0	0.0	0.0	0.0	0.0	0.0	0.0
K(121)	0.0001193792280143255	R:7.958615200955034e-05 , N:3.979307600477517e-05	0.0	0.0	0.0	0.0	0.0	0.0	0.0	7.958615200955034e-05	3.979307600477517e-05	0.0	0.0	0.0	0.0	0.0	0.0	0.0	0.0	0.0	0.0	0.0
M(668)	0.0001193792280143255	I:0.0001193792280143255	0.0	0.0001193792280143255	0.0	0.0	0.0	0.0	0.0	0.0	0.0	0.0	0.0	0.0	0.0	0.0	0.0	0.0	0.0	0.0	0.0	0.0
V(704)	0.0001193792280143255	I:7.958615200955034e-05 , A:3.979307600477517e-05	0.0	7.958615200955034e-05	0.0	0.0	0.0	0.0	3.979307600477517e-05	0.0	0.0	0.0	0.0	0.0	0.0	0.0	0.0	0.0	0.0	0.0	0.0	0.0
L(869)	0.0001193792280143255	F:0.0001193792280143255	0.0	0.0	0.0	0.0	0.0	0.0	0.0	0.0	0.0	0.0	0.0001193792280143255	0.0	0.0	0.0	0.0	0.0	0.0	0.0	0.0	0.0
L(90)	0.0001193792280143255	F:0.0001193792280143255	0.0	0.0	0.0	0.0	0.0	0.0	0.0	0.0	0.0	0.0	0.0001193792280143255	0.0	0.0	0.0	0.0	0.0	0.0	0.0	0.0	0.0
F(77)	0.0001193792280143255	V:3.979307600477517e-05 , S:7.958615200955034e-05	0.0	0.0	3.979307600477517e-05	7.958615200955034e-05	0.0	0.0	0.0	0.0	0.0	0.0	0.0	0.0	0.0	0.0	0.0	0.0	0.0	0.0	0.0	0.0
I(106)	0.0001193792280143255	V:0.0001193792280143255	0.0	0.0	0.0001193792280143255	0.0	0.0	0.0	0.0	0.0	0.0	0.0	0.0	0.0	0.0	0.0	0.0	0.0	0.0	0.0	0.0	0.0
I(307)	0.0001193792280143255	V:3.979307600477517e-05 , T:7.958615200955034e-05	0.0	0.0	3.979307600477517e-05	0.0	0.0	0.0	0.0	0.0	0.0	0.0	0.0	0.0	7.958615200955034e-05	0.0	0.0	0.0	0.0	0.0	0.0	0.0
S(1)	0.0001193792280143255	L:7.958615200955034e-05 , A:3.979307600477517e-05	7.958615200955034e-05	0.0	0.0	0.0	0.0	0.0	3.979307600477517e-05	0.0	0.0	0.0	0.0	0.0	0.0	0.0	0.0	0.0	0.0	0.0	0.0	0.0
G(712)	0.0001193792280143255	V:0.0001193792280143255	0.0	0.0	0.0001193792280143255	0.0	0.0	0.0	0.0	0.0	0.0	0.0	0.0	0.0	0.0	0.0	0.0	0.0	0.0	0.0	0.0	0.0
M(818)	0.0001193792280143255	L:0.0001193792280143255	0.0001193792280143255	0.0	0.0	0.0	0.0	0.0	0.0	0.0	0.0	0.0	0.0	0.0	0.0	0.0	0.0	0.0	0.0	0.0	0.0	0.0
L(270)	0.0001193792280143255	F:0.0001193792280143255	0.0	0.0	0.0	0.0	0.0	0.0	0.0	0.0	0.0	0.0	0.0001193792280143255	0.0	0.0	0.0	0.0	0.0	0.0	0.0	0.0	0.0
R(721)	0.0001193792280143255	L:3.979307600477517e-05 , C:7.958615200955034e-05	3.979307600477517e-05	0.0	0.0	0.0	7.958615200955034e-05	0.0	0.0	0.0	0.0	0.0	0.0	0.0	0.0	0.0	0.0	0.0	0.0	0.0	0.0	0.0
Q(773)	0.0001193792280143255	R:7.958615200955034e-05 , H:3.979307600477517e-05	0.0	0.0	0.0	0.0	0.0	0.0	0.0	7.958615200955034e-05	0.0	3.979307600477517e-05	0.0	0.0	0.0	0.0	0.0	0.0	0.0	0.0	0.0	0.0
S(768)	0.0001193792280143255	I:3.979307600477517e-05 , N:7.958615200955034e-05	0.0	3.979307600477517e-05	0.0	0.0	0.0	0.0	0.0	0.0	7.958615200955034e-05	0.0	0.0	0.0	0.0	0.0	0.0	0.0	0.0	0.0	0.0	0.0
L(212)	0.0001193792280143255	F:0.0001193792280143255	0.0	0.0	0.0	0.0	0.0	0.0	0.0	0.0	0.0	0.0	0.0001193792280143255	0.0	0.0	0.0	0.0	0.0	0.0	0.0	0.0	0.0
E(278)	0.0001193792280143255	D:0.0001193792280143255	0.0	0.0	0.0	0.0	0.0	0.0	0.0	0.0	0.0	0.0	0.0	0.0	0.0	0.0001193792280143255	0.0	0.0	0.0	0.0	0.0	0.0
L(282)	0.0001193792280143255	F:0.0001193792280143255	0.0	0.0	0.0	0.0	0.0	0.0	0.0	0.0	0.0	0.0	0.0001193792280143255	0.0	0.0	0.0	0.0	0.0	0.0	0.0	0.0	0.0
F(782)	0.0001193792280143255	L:3.979307600477517e-05 , V:7.958615200955034e-05	3.979307600477517e-05	0.0	7.958615200955034e-05	0.0	0.0	0.0	0.0	0.0	0.0	0.0	0.0	0.0	0.0	0.0	0.0	0.0	0.0	0.0	0.0	0.0
N(198)	0.0001193792280143255	S:7.958615200955034e-05 , K:3.979307600477517e-05	0.0	0.0	0.0	7.958615200955034e-05	0.0	0.0	0.0	0.0	0.0	0.0	0.0	0.0	0.0	0.0	0.0	0.0	3.979307600477517e-05	0.0	0.0	0.0
C(193)	0.0001193792280143255	L:3.979307600477517e-05 , S:7.958615200955034e-05	3.979307600477517e-05	0.0	0.0	7.958615200955034e-05	0.0	0.0	0.0	0.0	0.0	0.0	0.0	0.0	0.0	0.0	0.0	0.0	0.0	0.0	0.0	0.0
A(400)	0.0001193792280143255	S:7.958615200955034e-05 , T:3.979307600477517e-05	0.0	0.0	0.0	7.958615200955034e-05	0.0	0.0	0.0	0.0	0.0	0.0	0.0	0.0	3.979307600477517e-05	0.0	0.0	0.0	0.0	0.0	0.0	0.0
H(295)	0.0001193792280143255	Y:0.0001193792280143255	0.0	0.0	0.0	0.0	0.0	0.0001193792280143255	0.0	0.0	0.0	0.0	0.0	0.0	0.0	0.0	0.0	0.0	0.0	0.0	0.0	0.0
C(22)	7.958615200955034e-05	R:7.958615200955034e-05	0.0	0.0	0.0	0.0	0.0	0.0	0.0	7.958615200955034e-05	0.0	0.0	0.0	0.0	0.0	0.0	0.0	0.0	0.0	0.0	0.0	0.0
T(586)	7.958615200955034e-05	I:7.958615200955034e-05	0.0	7.958615200955034e-05	0.0	0.0	0.0	0.0	0.0	0.0	0.0	0.0	0.0	0.0	0.0	0.0	0.0	0.0	0.0	0.0	0.0	0.0
K(263)	7.958615200955034e-05	N:3.979307600477517e-05 , E:3.979307600477517e-05	0.0	0.0	0.0	0.0	0.0	0.0	0.0	0.0	3.979307600477517e-05	0.0	0.0	0.0	0.0	0.0	0.0	3.979307600477517e-05	0.0	0.0	0.0	0.0
V(320)	7.958615200955034e-05	L:3.979307600477517e-05 , A:3.979307600477517e-05	3.979307600477517e-05	0.0	0.0	0.0	0.0	0.0	3.979307600477517e-05	0.0	0.0	0.0	0.0	0.0	0.0	0.0	0.0	0.0	0.0	0.0	0.0	0.0
E(84)	7.958615200955034e-05	K:7.958615200955034e-05	0.0	0.0	0.0	0.0	0.0	0.0	0.0	0.0	0.0	0.0	0.0	0.0	0.0	0.0	0.0	0.0	7.958615200955034e-05	0.0	0.0	0.0
S(78)	7.958615200955034e-05	T:7.958615200955034e-05	0.0	0.0	0.0	0.0	0.0	0.0	0.0	0.0	0.0	0.0	0.0	0.0	7.958615200955034e-05	0.0	0.0	0.0	0.0	0.0	0.0	0.0
S(564)	7.958615200955034e-05	R:3.979307600477517e-05 , N:3.979307600477517e-05	0.0	0.0	0.0	0.0	0.0	0.0	0.0	3.979307600477517e-05	3.979307600477517e-05	0.0	0.0	0.0	0.0	0.0	0.0	0.0	0.0	0.0	0.0	0.0
L(630)	7.958615200955034e-05	F:7.958615200955034e-05	0.0	0.0	0.0	0.0	0.0	0.0	0.0	0.0	0.0	0.0	7.958615200955034e-05	0.0	0.0	0.0	0.0	0.0	0.0	0.0	0.0	0.0
V(342)	7.958615200955034e-05	F:3.979307600477517e-05 , M:3.979307600477517e-05	0.0	0.0	0.0	0.0	0.0	0.0	0.0	0.0	0.0	0.0	3.979307600477517e-05	0.0	0.0	0.0	3.979307600477517e-05	0.0	0.0	0.0	0.0	0.0
V(71)	7.958615200955034e-05	I:7.958615200955034e-05	0.0	7.958615200955034e-05	0.0	0.0	0.0	0.0	0.0	0.0	0.0	0.0	0.0	0.0	0.0	0.0	0.0	0.0	0.0	0.0	0.0	0.0
V(341)	7.958615200955034e-05	F:3.979307600477517e-05 , T:3.979307600477517e-05	0.0	0.0	0.0	0.0	0.0	0.0	0.0	0.0	0.0	0.0	3.979307600477517e-05	0.0	3.979307600477517e-05	0.0	0.0	0.0	0.0	0.0	0.0	0.0
M(615)	7.958615200955034e-05	I:3.979307600477517e-05 , V:3.979307600477517e-05	0.0	3.979307600477517e-05	3.979307600477517e-05	0.0	0.0	0.0	0.0	0.0	0.0	0.0	0.0	0.0	0.0	0.0	0.0	0.0	0.0	0.0	0.0	0.0
E(61)	7.958615200955034e-05	A:7.958615200955034e-05	0.0	0.0	0.0	0.0	0.0	0.0	7.958615200955034e-05	0.0	0.0	0.0	0.0	0.0	0.0	0.0	0.0	0.0	0.0	0.0	0.0	0.0
Q(57)	7.958615200955034e-05	R:3.979307600477517e-05 , H:3.979307600477517e-05	0.0	0.0	0.0	0.0	0.0	0.0	0.0	3.979307600477517e-05	0.0	3.979307600477517e-05	0.0	0.0	0.0	0.0	0.0	0.0	0.0	0.0	0.0	0.0
G(596)	7.958615200955034e-05	S:3.979307600477517e-05 , C:3.979307600477517e-05	0.0	0.0	0.0	3.979307600477517e-05	3.979307600477517e-05	0.0	0.0	0.0	0.0	0.0	0.0	0.0	0.0	0.0	0.0	0.0	0.0	0.0	0.0	0.0
K(47)	7.958615200955034e-05	R:7.958615200955034e-05	0.0	0.0	0.0	0.0	0.0	0.0	0.0	7.958615200955034e-05	0.0	0.0	0.0	0.0	0.0	0.0	0.0	0.0	0.0	0.0	0.0	0.0
R(349)	7.958615200955034e-05	S:3.979307600477517e-05 , K:3.979307600477517e-05	0.0	0.0	0.0	3.979307600477517e-05	0.0	0.0	0.0	0.0	0.0	0.0	0.0	0.0	0.0	0.0	0.0	0.0	3.979307600477517e-05	0.0	0.0	0.0
Y(289)	7.958615200955034e-05	C:3.979307600477517e-05 , H:3.979307600477517e-05	0.0	0.0	0.0	0.0	3.979307600477517e-05	0.0	0.0	0.0	0.0	3.979307600477517e-05	0.0	0.0	0.0	0.0	0.0	0.0	0.0	0.0	0.0	0.0
F(326)	7.958615200955034e-05	L:7.958615200955034e-05	7.958615200955034e-05	0.0	0.0	0.0	0.0	0.0	0.0	0.0	0.0	0.0	0.0	0.0	0.0	0.0	0.0	0.0	0.0	0.0	0.0	0.0
F(283)	7.958615200955034e-05	S:7.958615200955034e-05	0.0	0.0	0.0	7.958615200955034e-05	0.0	0.0	0.0	0.0	0.0	0.0	0.0	0.0	0.0	0.0	0.0	0.0	0.0	0.0	0.0	0.0
F(35)	7.958615200955034e-05	L:7.958615200955034e-05	7.958615200955034e-05	0.0	0.0	0.0	0.0	0.0	0.0	0.0	0.0	0.0	0.0	0.0	0.0	0.0	0.0	0.0	0.0	0.0	0.0	0.0
S(27)	7.958615200955034e-05	G:7.958615200955034e-05	0.0	0.0	0.0	0.0	0.0	0.0	0.0	0.0	0.0	0.0	0.0	7.958615200955034e-05	0.0	0.0	0.0	0.0	0.0	0.0	0.0	0.0
V(335)	7.958615200955034e-05	I:3.979307600477517e-05 , F:3.979307600477517e-05	0.0	3.979307600477517e-05	0.0	0.0	0.0	0.0	0.0	0.0	0.0	0.0	3.979307600477517e-05	0.0	0.0	0.0	0.0	0.0	0.0	0.0	0.0	0.0
V(410)	7.958615200955034e-05	I:7.958615200955034e-05	0.0	7.958615200955034e-05	0.0	0.0	0.0	0.0	0.0	0.0	0.0	0.0	0.0	0.0	0.0	0.0	0.0	0.0	0.0	0.0	0.0	0.0
M(633)	7.958615200955034e-05	L:3.979307600477517e-05 , I:3.979307600477517e-05	3.979307600477517e-05	3.979307600477517e-05	0.0	0.0	0.0	0.0	0.0	0.0	0.0	0.0	0.0	0.0	0.0	0.0	0.0	0.0	0.0	0.0	0.0	0.0
K(159)	7.958615200955034e-05	R:3.979307600477517e-05 , N:3.979307600477517e-05	0.0	0.0	0.0	0.0	0.0	0.0	0.0	3.979307600477517e-05	3.979307600477517e-05	0.0	0.0	0.0	0.0	0.0	0.0	0.0	0.0	0.0	0.0	0.0
D(418)	7.958615200955034e-05	N:7.958615200955034e-05	0.0	0.0	0.0	0.0	0.0	0.0	0.0	0.0	7.958615200955034e-05	0.0	0.0	0.0	0.0	0.0	0.0	0.0	0.0	0.0	0.0	0.0
D(421)	7.958615200955034e-05	Y:3.979307600477517e-05 , E:3.979307600477517e-05	0.0	0.0	0.0	0.0	0.0	3.979307600477517e-05	0.0	0.0	0.0	0.0	0.0	0.0	0.0	0.0	0.0	3.979307600477517e-05	0.0	0.0	0.0	0.0
F(422)	7.958615200955034e-05	Y:7.958615200955034e-05	0.0	0.0	0.0	0.0	0.0	7.958615200955034e-05	0.0	0.0	0.0	0.0	0.0	0.0	0.0	0.0	0.0	0.0	0.0	0.0	0.0	0.0
R(197)	7.958615200955034e-05	Q:7.958615200955034e-05	0.0	0.0	0.0	0.0	0.0	0.0	0.0	0.0	0.0	0.0	0.0	0.0	0.0	0.0	0.0	0.0	0.0	0.0	7.958615200955034e-05	0.0
V(424)	7.958615200955034e-05	L:7.958615200955034e-05	7.958615200955034e-05	0.0	0.0	0.0	0.0	0.0	0.0	0.0	0.0	0.0	0.0	0.0	0.0	0.0	0.0	0.0	0.0	0.0	0.0	0.0
S(425)	7.958615200955034e-05	Y:7.958615200955034e-05	0.0	0.0	0.0	0.0	0.0	7.958615200955034e-05	0.0	0.0	0.0	0.0	0.0	0.0	0.0	0.0	0.0	0.0	0.0	0.0	0.0	0.0
D(304)	7.958615200955034e-05	Y:3.979307600477517e-05 , N:3.979307600477517e-05	0.0	0.0	0.0	0.0	0.0	3.979307600477517e-05	0.0	0.0	3.979307600477517e-05	0.0	0.0	0.0	0.0	0.0	0.0	0.0	0.0	0.0	0.0	0.0
H(439)	7.958615200955034e-05	Y:7.958615200955034e-05	0.0	0.0	0.0	0.0	0.0	7.958615200955034e-05	0.0	0.0	0.0	0.0	0.0	0.0	0.0	0.0	0.0	0.0	0.0	0.0	0.0	0.0
K(391)	7.958615200955034e-05	E:7.958615200955034e-05	0.0	0.0	0.0	0.0	0.0	0.0	0.0	0.0	0.0	0.0	0.0	0.0	0.0	0.0	0.0	7.958615200955034e-05	0.0	0.0	0.0	0.0
A(199)	7.958615200955034e-05	S:3.979307600477517e-05 , T:3.979307600477517e-05	0.0	0.0	0.0	3.979307600477517e-05	0.0	0.0	0.0	0.0	0.0	0.0	0.0	0.0	3.979307600477517e-05	0.0	0.0	0.0	0.0	0.0	0.0	0.0
N(168)	7.958615200955034e-05	S:7.958615200955034e-05	0.0	0.0	0.0	7.958615200955034e-05	0.0	0.0	0.0	0.0	0.0	0.0	0.0	0.0	0.0	0.0	0.0	0.0	0.0	0.0	0.0	0.0
I(450)	7.958615200955034e-05	T:3.979307600477517e-05 , M:3.979307600477517e-05	0.0	0.0	0.0	0.0	0.0	0.0	0.0	0.0	0.0	0.0	0.0	0.0	3.979307600477517e-05	0.0	3.979307600477517e-05	0.0	0.0	0.0	0.0	0.0
N(215)	7.958615200955034e-05	H:3.979307600477517e-05 , D:3.979307600477517e-05	0.0	0.0	0.0	0.0	0.0	0.0	0.0	0.0	0.0	3.979307600477517e-05	0.0	0.0	0.0	3.979307600477517e-05	0.0	0.0	0.0	0.0	0.0	0.0
V(472)	7.958615200955034e-05	L:7.958615200955034e-05	7.958615200955034e-05	0.0	0.0	0.0	0.0	0.0	0.0	0.0	0.0	0.0	0.0	0.0	0.0	0.0	0.0	0.0	0.0	0.0	0.0	0.0
D(260)	7.958615200955034e-05	Y:3.979307600477517e-05 , E:3.979307600477517e-05	0.0	0.0	0.0	0.0	0.0	3.979307600477517e-05	0.0	0.0	0.0	0.0	0.0	0.0	0.0	0.0	0.0	3.979307600477517e-05	0.0	0.0	0.0	0.0
F(222)	7.958615200955034e-05	L:3.979307600477517e-05 , C:3.979307600477517e-05	3.979307600477517e-05	0.0	0.0	0.0	3.979307600477517e-05	0.0	0.0	0.0	0.0	0.0	0.0	0.0	0.0	0.0	0.0	0.0	0.0	0.0	0.0	0.0
V(475)	7.958615200955034e-05	I:7.958615200955034e-05	0.0	7.958615200955034e-05	0.0	0.0	0.0	0.0	0.0	0.0	0.0	0.0	0.0	0.0	0.0	0.0	0.0	0.0	0.0	0.0	0.0	0.0
G(228)	7.958615200955034e-05	D:7.958615200955034e-05	0.0	0.0	0.0	0.0	0.0	0.0	0.0	0.0	0.0	0.0	0.0	0.0	0.0	7.958615200955034e-05	0.0	0.0	0.0	0.0	0.0	0.0
V(147)	7.958615200955034e-05	A:7.958615200955034e-05	0.0	0.0	0.0	0.0	0.0	0.0	7.958615200955034e-05	0.0	0.0	0.0	0.0	0.0	0.0	0.0	0.0	0.0	0.0	0.0	0.0	0.0
G(137)	7.958615200955034e-05	V:7.958615200955034e-05	0.0	0.0	7.958615200955034e-05	0.0	0.0	0.0	0.0	0.0	0.0	0.0	0.0	0.0	0.0	0.0	0.0	0.0	0.0	0.0	0.0	0.0
D(484)	7.958615200955034e-05	Y:7.958615200955034e-05	0.0	0.0	0.0	0.0	0.0	7.958615200955034e-05	0.0	0.0	0.0	0.0	0.0	0.0	0.0	0.0	0.0	0.0	0.0	0.0	0.0	0.0
V(495)	7.958615200955034e-05	I:7.958615200955034e-05	0.0	7.958615200955034e-05	0.0	0.0	0.0	0.0	0.0	0.0	0.0	0.0	0.0	0.0	0.0	0.0	0.0	0.0	0.0	0.0	0.0	0.0
D(135)	7.958615200955034e-05	N:7.958615200955034e-05	0.0	0.0	0.0	0.0	0.0	0.0	0.0	0.0	7.958615200955034e-05	0.0	0.0	0.0	0.0	0.0	0.0	0.0	0.0	0.0	0.0	0.0
L(245)	7.958615200955034e-05	S:7.958615200955034e-05	0.0	0.0	0.0	7.958615200955034e-05	0.0	0.0	0.0	0.0	0.0	0.0	0.0	0.0	0.0	0.0	0.0	0.0	0.0	0.0	0.0	0.0
S(255)	7.958615200955034e-05	A:7.958615200955034e-05	0.0	0.0	0.0	0.0	0.0	0.0	7.958615200955034e-05	0.0	0.0	0.0	0.0	0.0	0.0	0.0	0.0	0.0	0.0	0.0	0.0	0.0
H(355)	7.958615200955034e-05	N:7.958615200955034e-05	0.0	0.0	0.0	0.0	0.0	0.0	0.0	0.0	7.958615200955034e-05	0.0	0.0	0.0	0.0	0.0	0.0	0.0	0.0	0.0	0.0	0.0
L(119)	7.958615200955034e-05	I:7.958615200955034e-05	0.0	7.958615200955034e-05	0.0	0.0	0.0	0.0	0.0	0.0	0.0	0.0	0.0	0.0	0.0	0.0	0.0	0.0	0.0	0.0	0.0	0.0
T(259)	7.958615200955034e-05	I:7.958615200955034e-05	0.0	7.958615200955034e-05	0.0	0.0	0.0	0.0	0.0	0.0	0.0	0.0	0.0	0.0	0.0	0.0	0.0	0.0	0.0	0.0	0.0	0.0
E(522)	7.958615200955034e-05	D:7.958615200955034e-05	0.0	0.0	0.0	0.0	0.0	0.0	0.0	0.0	0.0	0.0	0.0	0.0	0.0	7.958615200955034e-05	0.0	0.0	0.0	0.0	0.0	0.0
I(466)	7.958615200955034e-05	S:3.979307600477517e-05 , T:3.979307600477517e-05	0.0	0.0	0.0	3.979307600477517e-05	0.0	0.0	0.0	0.0	0.0	0.0	0.0	0.0	3.979307600477517e-05	0.0	0.0	0.0	0.0	0.0	0.0	0.0
V(667)	7.958615200955034e-05	I:7.958615200955034e-05	0.0	7.958615200955034e-05	0.0	0.0	0.0	0.0	0.0	0.0	0.0	0.0	0.0	0.0	0.0	0.0	0.0	0.0	0.0	0.0	0.0	0.0
D(804)	7.958615200955034e-05	N:3.979307600477517e-05 , E:3.979307600477517e-05	0.0	0.0	0.0	0.0	0.0	0.0	0.0	0.0	3.979307600477517e-05	0.0	0.0	0.0	0.0	0.0	0.0	3.979307600477517e-05	0.0	0.0	0.0	0.0
A(685)	7.958615200955034e-05	S:7.958615200955034e-05	0.0	0.0	0.0	7.958615200955034e-05	0.0	0.0	0.0	0.0	0.0	0.0	0.0	0.0	0.0	0.0	0.0	0.0	0.0	0.0	0.0	0.0
A(878)	7.958615200955034e-05	V:3.979307600477517e-05 , S:3.979307600477517e-05	0.0	0.0	3.979307600477517e-05	3.979307600477517e-05	0.0	0.0	0.0	0.0	0.0	0.0	0.0	0.0	0.0	0.0	0.0	0.0	0.0	0.0	0.0	0.0
E(802)	7.958615200955034e-05	D:7.958615200955034e-05	0.0	0.0	0.0	0.0	0.0	0.0	0.0	0.0	0.0	0.0	0.0	0.0	0.0	7.958615200955034e-05	0.0	0.0	0.0	0.0	0.0	0.0
A(660)	7.958615200955034e-05	S:7.958615200955034e-05	0.0	0.0	0.0	7.958615200955034e-05	0.0	0.0	0.0	0.0	0.0	0.0	0.0	0.0	0.0	0.0	0.0	0.0	0.0	0.0	0.0	0.0
A(747)	7.958615200955034e-05	S:7.958615200955034e-05	0.0	0.0	0.0	7.958615200955034e-05	0.0	0.0	0.0	0.0	0.0	0.0	0.0	0.0	0.0	0.0	0.0	0.0	0.0	0.0	0.0	0.0
G(774)	7.958615200955034e-05	S:7.958615200955034e-05	0.0	0.0	0.0	7.958615200955034e-05	0.0	0.0	0.0	0.0	0.0	0.0	0.0	0.0	0.0	0.0	0.0	0.0	0.0	0.0	0.0	0.0
R(726)	7.958615200955034e-05	S:3.979307600477517e-05 , K:3.979307600477517e-05	0.0	0.0	0.0	3.979307600477517e-05	0.0	0.0	0.0	0.0	0.0	0.0	0.0	0.0	0.0	0.0	0.0	0.0	3.979307600477517e-05	0.0	0.0	0.0
I(856)	7.958615200955034e-05	V:3.979307600477517e-05 , T:3.979307600477517e-05	0.0	0.0	3.979307600477517e-05	0.0	0.0	0.0	0.0	0.0	0.0	0.0	0.0	0.0	3.979307600477517e-05	0.0	0.0	0.0	0.0	0.0	0.0	0.0
M(756)	7.958615200955034e-05	I:7.958615200955034e-05	0.0	7.958615200955034e-05	0.0	0.0	0.0	0.0	0.0	0.0	0.0	0.0	0.0	0.0	0.0	0.0	0.0	0.0	0.0	0.0	0.0	0.0
P(873)	7.958615200955034e-05	S:7.958615200955034e-05	0.0	0.0	0.0	7.958615200955034e-05	0.0	0.0	0.0	0.0	0.0	0.0	0.0	0.0	0.0	0.0	0.0	0.0	0.0	0.0	0.0	0.0
V(720)	7.958615200955034e-05	F:7.958615200955034e-05	0.0	0.0	0.0	0.0	0.0	0.0	0.0	0.0	0.0	0.0	7.958615200955034e-05	0.0	0.0	0.0	0.0	0.0	0.0	0.0	0.0	0.0
A(797)	7.958615200955034e-05	S:3.979307600477517e-05 , P:3.979307600477517e-05	0.0	0.0	0.0	3.979307600477517e-05	0.0	0.0	0.0	0.0	0.0	0.0	0.0	0.0	0.0	0.0	0.0	0.0	0.0	3.979307600477517e-05	0.0	0.0
V(905)	7.958615200955034e-05	A:7.958615200955034e-05	0.0	0.0	0.0	0.0	0.0	0.0	7.958615200955034e-05	0.0	0.0	0.0	0.0	0.0	0.0	0.0	0.0	0.0	0.0	0.0	0.0	0.0
N(722)	7.958615200955034e-05	D:7.958615200955034e-05	0.0	0.0	0.0	0.0	0.0	0.0	0.0	0.0	0.0	0.0	0.0	0.0	0.0	7.958615200955034e-05	0.0	0.0	0.0	0.0	0.0	0.0
N(705)	7.958615200955034e-05	K:7.958615200955034e-05	0.0	0.0	0.0	0.0	0.0	0.0	0.0	0.0	0.0	0.0	0.0	0.0	0.0	0.0	0.0	0.0	7.958615200955034e-05	0.0	0.0	0.0
S(364)	3.979307600477517e-05	F:3.979307600477517e-05	0.0	0.0	0.0	0.0	0.0	0.0	0.0	0.0	0.0	0.0	3.979307600477517e-05	0.0	0.0	0.0	0.0	0.0	0.0	0.0	0.0	0.0
V(96)	3.979307600477517e-05	A:3.979307600477517e-05	0.0	0.0	0.0	0.0	0.0	0.0	3.979307600477517e-05	0.0	0.0	0.0	0.0	0.0	0.0	0.0	0.0	0.0	0.0	0.0	0.0	0.0
V(675)	3.979307600477517e-05	F:3.979307600477517e-05	0.0	0.0	0.0	0.0	0.0	0.0	0.0	0.0	0.0	0.0	3.979307600477517e-05	0.0	0.0	0.0	0.0	0.0	0.0	0.0	0.0	0.0
I(114)	3.979307600477517e-05	M:3.979307600477517e-05	0.0	0.0	0.0	0.0	0.0	0.0	0.0	0.0	0.0	0.0	0.0	0.0	0.0	0.0	3.979307600477517e-05	0.0	0.0	0.0	0.0	0.0
K(369)	3.979307600477517e-05	M:3.979307600477517e-05	0.0	0.0	0.0	0.0	0.0	0.0	0.0	0.0	0.0	0.0	0.0	0.0	0.0	0.0	3.979307600477517e-05	0.0	0.0	0.0	0.0	0.0
I(494)	3.979307600477517e-05	M:3.979307600477517e-05	0.0	0.0	0.0	0.0	0.0	0.0	0.0	0.0	0.0	0.0	0.0	0.0	0.0	0.0	3.979307600477517e-05	0.0	0.0	0.0	0.0	0.0
T(801)	3.979307600477517e-05	I:3.979307600477517e-05	0.0	3.979307600477517e-05	0.0	0.0	0.0	0.0	0.0	0.0	0.0	0.0	0.0	0.0	0.0	0.0	0.0	0.0	0.0	0.0	0.0	0.0
H(872)	3.979307600477517e-05	N:3.979307600477517e-05	0.0	0.0	0.0	0.0	0.0	0.0	0.0	0.0	3.979307600477517e-05	0.0	0.0	0.0	0.0	0.0	0.0	0.0	0.0	0.0	0.0	0.0
V(493)	3.979307600477517e-05	I:3.979307600477517e-05	0.0	3.979307600477517e-05	0.0	0.0	0.0	0.0	0.0	0.0	0.0	0.0	0.0	0.0	0.0	0.0	0.0	0.0	0.0	0.0	0.0	0.0
H(362)	3.979307600477517e-05	Y:3.979307600477517e-05	0.0	0.0	0.0	0.0	0.0	3.979307600477517e-05	0.0	0.0	0.0	0.0	0.0	0.0	0.0	0.0	0.0	0.0	0.0	0.0	0.0	0.0
G(670)	3.979307600477517e-05	C:3.979307600477517e-05	0.0	0.0	0.0	0.0	3.979307600477517e-05	0.0	0.0	0.0	0.0	0.0	0.0	0.0	0.0	0.0	0.0	0.0	0.0	0.0	0.0	0.0
N(874)	3.979307600477517e-05	K:3.979307600477517e-05	0.0	0.0	0.0	0.0	0.0	0.0	0.0	0.0	0.0	0.0	0.0	0.0	0.0	0.0	0.0	0.0	3.979307600477517e-05	0.0	0.0	0.0
V(233)	3.979307600477517e-05	I:3.979307600477517e-05	0.0	3.979307600477517e-05	0.0	0.0	0.0	0.0	0.0	0.0	0.0	0.0	0.0	0.0	0.0	0.0	0.0	0.0	0.0	0.0	0.0	0.0
M(542)	3.979307600477517e-05	L:3.979307600477517e-05	3.979307600477517e-05	0.0	0.0	0.0	0.0	0.0	0.0	0.0	0.0	0.0	0.0	0.0	0.0	0.0	0.0	0.0	0.0	0.0	0.0	0.0
P(339)	3.979307600477517e-05	T:3.979307600477517e-05	0.0	0.0	0.0	0.0	0.0	0.0	0.0	0.0	0.0	0.0	0.0	0.0	3.979307600477517e-05	0.0	0.0	0.0	0.0	0.0	0.0	0.0
F(340)	3.979307600477517e-05	L:3.979307600477517e-05	3.979307600477517e-05	0.0	0.0	0.0	0.0	0.0	0.0	0.0	0.0	0.0	0.0	0.0	0.0	0.0	0.0	0.0	0.0	0.0	0.0	0.0
K(890)	3.979307600477517e-05	N:3.979307600477517e-05	0.0	0.0	0.0	0.0	0.0	0.0	0.0	0.0	3.979307600477517e-05	0.0	0.0	0.0	0.0	0.0	0.0	0.0	0.0	0.0	0.0	0.0
D(740)	3.979307600477517e-05	N:3.979307600477517e-05	0.0	0.0	0.0	0.0	0.0	0.0	0.0	0.0	3.979307600477517e-05	0.0	0.0	0.0	0.0	0.0	0.0	0.0	0.0	0.0	0.0	0.0
D(736)	3.979307600477517e-05	Y:3.979307600477517e-05	0.0	0.0	0.0	0.0	0.0	3.979307600477517e-05	0.0	0.0	0.0	0.0	0.0	0.0	0.0	0.0	0.0	0.0	0.0	0.0	0.0	0.0
V(535)	3.979307600477517e-05	I:3.979307600477517e-05	0.0	3.979307600477517e-05	0.0	0.0	0.0	0.0	0.0	0.0	0.0	0.0	0.0	0.0	0.0	0.0	0.0	0.0	0.0	0.0	0.0	0.0
E(83)	3.979307600477517e-05	G:3.979307600477517e-05	0.0	0.0	0.0	0.0	0.0	0.0	0.0	0.0	0.0	0.0	0.0	3.979307600477517e-05	0.0	0.0	0.0	0.0	0.0	0.0	0.0	0.0
C(799)	3.979307600477517e-05	F:3.979307600477517e-05	0.0	0.0	0.0	0.0	0.0	0.0	0.0	0.0	0.0	0.0	3.979307600477517e-05	0.0	0.0	0.0	0.0	0.0	0.0	0.0	0.0	0.0
Y(884)	3.979307600477517e-05	H:3.979307600477517e-05	0.0	0.0	0.0	0.0	0.0	0.0	0.0	0.0	0.0	3.979307600477517e-05	0.0	0.0	0.0	0.0	0.0	0.0	0.0	0.0	0.0	0.0
V(231)	3.979307600477517e-05	I:3.979307600477517e-05	0.0	3.979307600477517e-05	0.0	0.0	0.0	0.0	0.0	0.0	0.0	0.0	0.0	0.0	0.0	0.0	0.0	0.0	0.0	0.0	0.0	0.0
Y(87)	3.979307600477517e-05	H:3.979307600477517e-05	0.0	0.0	0.0	0.0	0.0	0.0	0.0	0.0	0.0	3.979307600477517e-05	0.0	0.0	0.0	0.0	0.0	0.0	0.0	0.0	0.0	0.0
L(527)	3.979307600477517e-05	I:3.979307600477517e-05	0.0	3.979307600477517e-05	0.0	0.0	0.0	0.0	0.0	0.0	0.0	0.0	0.0	0.0	0.0	0.0	0.0	0.0	0.0	0.0	0.0	0.0
F(348)	3.979307600477517e-05	L:3.979307600477517e-05	3.979307600477517e-05	0.0	0.0	0.0	0.0	0.0	0.0	0.0	0.0	0.0	0.0	0.0	0.0	0.0	0.0	0.0	0.0	0.0	0.0	0.0
E(350)	3.979307600477517e-05	K:3.979307600477517e-05	0.0	0.0	0.0	0.0	0.0	0.0	0.0	0.0	0.0	0.0	0.0	0.0	0.0	0.0	0.0	0.0	3.979307600477517e-05	0.0	0.0	0.0
N(491)	3.979307600477517e-05	K:3.979307600477517e-05	0.0	0.0	0.0	0.0	0.0	0.0	0.0	0.0	0.0	0.0	0.0	0.0	0.0	0.0	0.0	0.0	3.979307600477517e-05	0.0	0.0	0.0
Q(492)	3.979307600477517e-05	R:3.979307600477517e-05	0.0	0.0	0.0	0.0	0.0	0.0	0.0	3.979307600477517e-05	0.0	0.0	0.0	0.0	0.0	0.0	0.0	0.0	0.0	0.0	0.0	0.0
T(206)	3.979307600477517e-05	A:3.979307600477517e-05	0.0	0.0	0.0	0.0	0.0	0.0	3.979307600477517e-05	0.0	0.0	0.0	0.0	0.0	0.0	0.0	0.0	0.0	0.0	0.0	0.0	0.0
R(118)	3.979307600477517e-05	H:3.979307600477517e-05	0.0	0.0	0.0	0.0	0.0	0.0	0.0	0.0	0.0	3.979307600477517e-05	0.0	0.0	0.0	0.0	0.0	0.0	0.0	0.0	0.0	0.0
V(693)	3.979307600477517e-05	I:3.979307600477517e-05	0.0	3.979307600477517e-05	0.0	0.0	0.0	0.0	0.0	0.0	0.0	0.0	0.0	0.0	0.0	0.0	0.0	0.0	0.0	0.0	0.0	0.0
Q(444)	3.979307600477517e-05	K:3.979307600477517e-05	0.0	0.0	0.0	0.0	0.0	0.0	0.0	0.0	0.0	0.0	0.0	0.0	0.0	0.0	0.0	0.0	3.979307600477517e-05	0.0	0.0	0.0
T(402)	3.979307600477517e-05	I:3.979307600477517e-05	0.0	3.979307600477517e-05	0.0	0.0	0.0	0.0	0.0	0.0	0.0	0.0	0.0	0.0	0.0	0.0	0.0	0.0	0.0	0.0	0.0	0.0
N(158)	3.979307600477517e-05	D:3.979307600477517e-05	0.0	0.0	0.0	0.0	0.0	0.0	0.0	0.0	0.0	0.0	0.0	0.0	0.0	3.979307600477517e-05	0.0	0.0	0.0	0.0	0.0	0.0
L(708)	3.979307600477517e-05	E:3.979307600477517e-05	0.0	0.0	0.0	0.0	0.0	0.0	0.0	0.0	0.0	0.0	0.0	0.0	0.0	0.0	0.0	3.979307600477517e-05	0.0	0.0	0.0	0.0
A(406)	3.979307600477517e-05	S:3.979307600477517e-05	0.0	0.0	0.0	3.979307600477517e-05	0.0	0.0	0.0	0.0	0.0	0.0	0.0	0.0	0.0	0.0	0.0	0.0	0.0	0.0	0.0	0.0
Y(163)	3.979307600477517e-05	C:3.979307600477517e-05	0.0	0.0	0.0	0.0	3.979307600477517e-05	0.0	0.0	0.0	0.0	0.0	0.0	0.0	0.0	0.0	0.0	0.0	0.0	0.0	0.0	0.0
V(435)	3.979307600477517e-05	F:3.979307600477517e-05	0.0	0.0	0.0	0.0	0.0	0.0	0.0	0.0	0.0	0.0	3.979307600477517e-05	0.0	0.0	0.0	0.0	0.0	0.0	0.0	0.0	0.0
D(164)	3.979307600477517e-05	G:3.979307600477517e-05	0.0	0.0	0.0	0.0	0.0	0.0	0.0	0.0	0.0	0.0	0.0	3.979307600477517e-05	0.0	0.0	0.0	0.0	0.0	0.0	0.0	0.0
T(710)	3.979307600477517e-05	I:3.979307600477517e-05	0.0	3.979307600477517e-05	0.0	0.0	0.0	0.0	0.0	0.0	0.0	0.0	0.0	0.0	0.0	0.0	0.0	0.0	0.0	0.0	0.0	0.0
V(166)	3.979307600477517e-05	L:3.979307600477517e-05	3.979307600477517e-05	0.0	0.0	0.0	0.0	0.0	0.0	0.0	0.0	0.0	0.0	0.0	0.0	0.0	0.0	0.0	0.0	0.0	0.0	0.0
K(430)	3.979307600477517e-05	R:3.979307600477517e-05	0.0	0.0	0.0	0.0	0.0	0.0	0.0	3.979307600477517e-05	0.0	0.0	0.0	0.0	0.0	0.0	0.0	0.0	0.0	0.0	0.0	0.0
E(167)	3.979307600477517e-05	A:3.979307600477517e-05	0.0	0.0	0.0	0.0	0.0	0.0	3.979307600477517e-05	0.0	0.0	0.0	0.0	0.0	0.0	0.0	0.0	0.0	0.0	0.0	0.0	0.0
L(186)	3.979307600477517e-05	F:3.979307600477517e-05	0.0	0.0	0.0	0.0	0.0	0.0	0.0	0.0	0.0	0.0	3.979307600477517e-05	0.0	0.0	0.0	0.0	0.0	0.0	0.0	0.0	0.0
K(821)	3.979307600477517e-05	R:3.979307600477517e-05	0.0	0.0	0.0	0.0	0.0	0.0	0.0	3.979307600477517e-05	0.0	0.0	0.0	0.0	0.0	0.0	0.0	0.0	0.0	0.0	0.0	0.0
D(825)	3.979307600477517e-05	G:3.979307600477517e-05	0.0	0.0	0.0	0.0	0.0	0.0	0.0	0.0	0.0	0.0	0.0	3.979307600477517e-05	0.0	0.0	0.0	0.0	0.0	0.0	0.0	0.0
D(833)	3.979307600477517e-05	N:3.979307600477517e-05	0.0	0.0	0.0	0.0	0.0	0.0	0.0	0.0	3.979307600477517e-05	0.0	0.0	0.0	0.0	0.0	0.0	0.0	0.0	0.0	0.0	0.0
F(192)	3.979307600477517e-05	L:3.979307600477517e-05	3.979307600477517e-05	0.0	0.0	0.0	0.0	0.0	0.0	0.0	0.0	0.0	0.0	0.0	0.0	0.0	0.0	0.0	0.0	0.0	0.0	0.0
V(398)	3.979307600477517e-05	I:3.979307600477517e-05	0.0	3.979307600477517e-05	0.0	0.0	0.0	0.0	0.0	0.0	0.0	0.0	0.0	0.0	0.0	0.0	0.0	0.0	0.0	0.0	0.0	0.0
I(488)	3.979307600477517e-05	V:3.979307600477517e-05	0.0	0.0	3.979307600477517e-05	0.0	0.0	0.0	0.0	0.0	0.0	0.0	0.0	0.0	0.0	0.0	0.0	0.0	0.0	0.0	0.0	0.0
L(470)	3.979307600477517e-05	V:3.979307600477517e-05	0.0	0.0	3.979307600477517e-05	0.0	0.0	0.0	0.0	0.0	0.0	0.0	0.0	0.0	0.0	0.0	0.0	0.0	0.0	0.0	0.0	0.0
C(482)	3.979307600477517e-05	S:3.979307600477517e-05	0.0	0.0	0.0	3.979307600477517e-05	0.0	0.0	0.0	0.0	0.0	0.0	0.0	0.0	0.0	0.0	0.0	0.0	0.0	0.0	0.0	0.0
D(336)	3.979307600477517e-05	G:3.979307600477517e-05	0.0	0.0	0.0	0.0	0.0	0.0	0.0	0.0	0.0	0.0	0.0	3.979307600477517e-05	0.0	0.0	0.0	0.0	0.0	0.0	0.0	0.0
L(127)	3.979307600477517e-05	F:3.979307600477517e-05	0.0	0.0	0.0	0.0	0.0	0.0	0.0	0.0	0.0	0.0	3.979307600477517e-05	0.0	0.0	0.0	0.0	0.0	0.0	0.0	0.0	0.0
V(476)	3.979307600477517e-05	I:3.979307600477517e-05	0.0	3.979307600477517e-05	0.0	0.0	0.0	0.0	0.0	0.0	0.0	0.0	0.0	0.0	0.0	0.0	0.0	0.0	0.0	0.0	0.0	0.0
Y(129)	3.979307600477517e-05	H:3.979307600477517e-05	0.0	0.0	0.0	0.0	0.0	0.0	0.0	0.0	0.0	3.979307600477517e-05	0.0	0.0	0.0	0.0	0.0	0.0	0.0	0.0	0.0	0.0
R(132)	3.979307600477517e-05	M:3.979307600477517e-05	0.0	0.0	0.0	0.0	0.0	0.0	0.0	0.0	0.0	0.0	0.0	0.0	0.0	0.0	3.979307600477517e-05	0.0	0.0	0.0	0.0	0.0
D(717)	3.979307600477517e-05	N:3.979307600477517e-05	0.0	0.0	0.0	0.0	0.0	0.0	0.0	0.0	3.979307600477517e-05	0.0	0.0	0.0	0.0	0.0	0.0	0.0	0.0	0.0	0.0	0.0
N(386)	3.979307600477517e-05	S:3.979307600477517e-05	0.0	0.0	0.0	3.979307600477517e-05	0.0	0.0	0.0	0.0	0.0	0.0	0.0	0.0	0.0	0.0	0.0	0.0	0.0	0.0	0.0	0.0
S(451)	3.979307600477517e-05	R:3.979307600477517e-05	0.0	0.0	0.0	0.0	0.0	0.0	0.0	3.979307600477517e-05	0.0	0.0	0.0	0.0	0.0	0.0	0.0	0.0	0.0	0.0	0.0	0.0
N(138)	3.979307600477517e-05	S:3.979307600477517e-05	0.0	0.0	0.0	3.979307600477517e-05	0.0	0.0	0.0	0.0	0.0	0.0	0.0	0.0	0.0	0.0	0.0	0.0	0.0	0.0	0.0	0.0
C(464)	3.979307600477517e-05	F:3.979307600477517e-05	0.0	0.0	0.0	0.0	0.0	0.0	0.0	0.0	0.0	0.0	3.979307600477517e-05	0.0	0.0	0.0	0.0	0.0	0.0	0.0	0.0	0.0
H(810)	3.979307600477517e-05	L:3.979307600477517e-05	3.979307600477517e-05	0.0	0.0	0.0	0.0	0.0	0.0	0.0	0.0	0.0	0.0	0.0	0.0	0.0	0.0	0.0	0.0	0.0	0.0	0.0
L(389)	3.979307600477517e-05	Q:3.979307600477517e-05	0.0	0.0	0.0	0.0	0.0	0.0	0.0	0.0	0.0	0.0	0.0	0.0	0.0	0.0	0.0	0.0	0.0	0.0	3.979307600477517e-05	0.0
K(143)	3.979307600477517e-05	R:3.979307600477517e-05	0.0	0.0	0.0	0.0	0.0	0.0	0.0	3.979307600477517e-05	0.0	0.0	0.0	0.0	0.0	0.0	0.0	0.0	0.0	0.0	0.0	0.0
K(281)	3.979307600477517e-05	E:3.979307600477517e-05	0.0	0.0	0.0	0.0	0.0	0.0	0.0	0.0	0.0	0.0	0.0	0.0	0.0	0.0	0.0	3.979307600477517e-05	0.0	0.0	0.0	0.0
T(393)	3.979307600477517e-05	I:3.979307600477517e-05	0.0	3.979307600477517e-05	0.0	0.0	0.0	0.0	0.0	0.0	0.0	0.0	0.0	0.0	0.0	0.0	0.0	0.0	0.0	0.0	0.0	0.0
L(544)	3.979307600477517e-05	V:3.979307600477517e-05	0.0	0.0	3.979307600477517e-05	0.0	0.0	0.0	0.0	0.0	0.0	0.0	0.0	0.0	0.0	0.0	0.0	0.0	0.0	0.0	0.0	0.0
Q(932)	3.979307600477517e-05	H:3.979307600477517e-05	0.0	0.0	0.0	0.0	0.0	0.0	0.0	0.0	0.0	3.979307600477517e-05	0.0	0.0	0.0	0.0	0.0	0.0	0.0	0.0	0.0	0.0
K(577)	3.979307600477517e-05	L:3.979307600477517e-05	3.979307600477517e-05	0.0	0.0	0.0	0.0	0.0	0.0	0.0	0.0	0.0	0.0	0.0	0.0	0.0	0.0	0.0	0.0	0.0	0.0	0.0
E(277)	3.979307600477517e-05	A:3.979307600477517e-05	0.0	0.0	0.0	0.0	0.0	0.0	3.979307600477517e-05	0.0	0.0	0.0	0.0	0.0	0.0	0.0	0.0	0.0	0.0	0.0	0.0	0.0
F(48)	3.979307600477517e-05	I:3.979307600477517e-05	0.0	3.979307600477517e-05	0.0	0.0	0.0	0.0	0.0	0.0	0.0	0.0	0.0	0.0	0.0	0.0	0.0	0.0	0.0	0.0	0.0	0.0
S(318)	3.979307600477517e-05	F:3.979307600477517e-05	0.0	0.0	0.0	0.0	0.0	0.0	0.0	0.0	0.0	0.0	3.979307600477517e-05	0.0	0.0	0.0	0.0	0.0	0.0	0.0	0.0	0.0
F(275)	3.979307600477517e-05	Y:3.979307600477517e-05	0.0	0.0	0.0	0.0	0.0	3.979307600477517e-05	0.0	0.0	0.0	0.0	0.0	0.0	0.0	0.0	0.0	0.0	0.0	0.0	0.0	0.0
W(916)	3.979307600477517e-05	C:3.979307600477517e-05	0.0	0.0	0.0	0.0	3.979307600477517e-05	0.0	0.0	0.0	0.0	0.0	0.0	0.0	0.0	0.0	0.0	0.0	0.0	0.0	0.0	0.0
D(291)	3.979307600477517e-05	V:3.979307600477517e-05	0.0	0.0	3.979307600477517e-05	0.0	0.0	0.0	0.0	0.0	0.0	0.0	0.0	0.0	0.0	0.0	0.0	0.0	0.0	0.0	0.0	0.0
Q(292)	3.979307600477517e-05	H:3.979307600477517e-05	0.0	0.0	0.0	0.0	0.0	0.0	0.0	0.0	0.0	3.979307600477517e-05	0.0	0.0	0.0	0.0	0.0	0.0	0.0	0.0	0.0	0.0
S(15)	3.979307600477517e-05	R:3.979307600477517e-05	0.0	0.0	0.0	0.0	0.0	0.0	0.0	3.979307600477517e-05	0.0	0.0	0.0	0.0	0.0	0.0	0.0	0.0	0.0	0.0	0.0	0.0
I(579)	3.979307600477517e-05	M:3.979307600477517e-05	0.0	0.0	0.0	0.0	0.0	0.0	0.0	0.0	0.0	0.0	0.0	0.0	0.0	0.0	3.979307600477517e-05	0.0	0.0	0.0	0.0	0.0
A(771)	3.979307600477517e-05	S:3.979307600477517e-05	0.0	0.0	0.0	3.979307600477517e-05	0.0	0.0	0.0	0.0	0.0	0.0	0.0	0.0	0.0	0.0	0.0	0.0	0.0	0.0	0.0	0.0
A(581)	3.979307600477517e-05	V:3.979307600477517e-05	0.0	0.0	3.979307600477517e-05	0.0	0.0	0.0	0.0	0.0	0.0	0.0	0.0	0.0	0.0	0.0	0.0	0.0	0.0	0.0	0.0	0.0
L(614)	3.979307600477517e-05	F:3.979307600477517e-05	0.0	0.0	0.0	0.0	0.0	0.0	0.0	0.0	0.0	0.0	3.979307600477517e-05	0.0	0.0	0.0	0.0	0.0	0.0	0.0	0.0	0.0
V(42)	3.979307600477517e-05	L:3.979307600477517e-05	3.979307600477517e-05	0.0	0.0	0.0	0.0	0.0	0.0	0.0	0.0	0.0	0.0	0.0	0.0	0.0	0.0	0.0	0.0	0.0	0.0	0.0
R(18)	3.979307600477517e-05	C:3.979307600477517e-05	0.0	0.0	0.0	0.0	3.979307600477517e-05	0.0	0.0	0.0	0.0	0.0	0.0	0.0	0.0	0.0	0.0	0.0	0.0	0.0	0.0	0.0
N(909)	3.979307600477517e-05	T:3.979307600477517e-05	0.0	0.0	0.0	0.0	0.0	0.0	0.0	0.0	0.0	0.0	0.0	0.0	3.979307600477517e-05	0.0	0.0	0.0	0.0	0.0	0.0	0.0
T(252)	3.979307600477517e-05	A:3.979307600477517e-05	0.0	0.0	0.0	0.0	0.0	0.0	3.979307600477517e-05	0.0	0.0	0.0	0.0	0.0	0.0	0.0	0.0	0.0	0.0	0.0	0.0	0.0
P(612)	3.979307600477517e-05	S:3.979307600477517e-05	0.0	0.0	0.0	3.979307600477517e-05	0.0	0.0	0.0	0.0	0.0	0.0	0.0	0.0	0.0	0.0	0.0	0.0	0.0	0.0	0.0	0.0
E(254)	3.979307600477517e-05	D:3.979307600477517e-05	0.0	0.0	0.0	0.0	0.0	0.0	0.0	0.0	0.0	0.0	0.0	0.0	0.0	3.979307600477517e-05	0.0	0.0	0.0	0.0	0.0	0.0
E(610)	3.979307600477517e-05	G:3.979307600477517e-05	0.0	0.0	0.0	0.0	0.0	0.0	0.0	0.0	0.0	0.0	0.0	3.979307600477517e-05	0.0	0.0	0.0	0.0	0.0	0.0	0.0	0.0
Y(238)	3.979307600477517e-05	H:3.979307600477517e-05	0.0	0.0	0.0	0.0	0.0	0.0	0.0	0.0	0.0	3.979307600477517e-05	0.0	0.0	0.0	0.0	0.0	0.0	0.0	0.0	0.0	0.0
V(609)	3.979307600477517e-05	I:3.979307600477517e-05	0.0	3.979307600477517e-05	0.0	0.0	0.0	0.0	0.0	0.0	0.0	0.0	0.0	0.0	0.0	0.0	0.0	0.0	0.0	0.0	0.0	0.0
R(914)	3.979307600477517e-05	K:3.979307600477517e-05	0.0	0.0	0.0	0.0	0.0	0.0	0.0	0.0	0.0	0.0	0.0	0.0	0.0	0.0	0.0	0.0	3.979307600477517e-05	0.0	0.0	0.0
R(651)	3.979307600477517e-05	C:3.979307600477517e-05	0.0	0.0	0.0	0.0	3.979307600477517e-05	0.0	0.0	0.0	0.0	0.0	0.0	0.0	0.0	0.0	0.0	0.0	0.0	0.0	0.0	0.0
S(592)	3.979307600477517e-05	G:3.979307600477517e-05	0.0	0.0	0.0	0.0	0.0	0.0	0.0	0.0	0.0	0.0	0.0	3.979307600477517e-05	0.0	0.0	0.0	0.0	0.0	0.0	0.0	0.0
H(256)	3.979307600477517e-05	Y:3.979307600477517e-05	0.0	0.0	0.0	0.0	0.0	3.979307600477517e-05	0.0	0.0	0.0	0.0	0.0	0.0	0.0	0.0	0.0	0.0	0.0	0.0	0.0	0.0
K(267)	3.979307600477517e-05	N:3.979307600477517e-05	0.0	0.0	0.0	0.0	0.0	0.0	0.0	0.0	3.979307600477517e-05	0.0	0.0	0.0	0.0	0.0	0.0	0.0	0.0	0.0	0.0	0.0
T(769)	3.979307600477517e-05	I:3.979307600477517e-05	0.0	3.979307600477517e-05	0.0	0.0	0.0	0.0	0.0	0.0	0.0	0.0	0.0	0.0	0.0	0.0	0.0	0.0	0.0	0.0	0.0	0.0
S(649)	3.979307600477517e-05	P:3.979307600477517e-05	0.0	0.0	0.0	0.0	0.0	0.0	0.0	0.0	0.0	0.0	0.0	0.0	0.0	0.0	0.0	0.0	0.0	3.979307600477517e-05	0.0	0.0
N(64)	3.979307600477517e-05	T:3.979307600477517e-05	0.0	0.0	0.0	0.0	0.0	0.0	0.0	0.0	0.0	0.0	0.0	0.0	3.979307600477517e-05	0.0	0.0	0.0	0.0	0.0	0.0	0.0
F(56)	3.979307600477517e-05	Y:3.979307600477517e-05	0.0	0.0	0.0	0.0	0.0	3.979307600477517e-05	0.0	0.0	0.0	0.0	0.0	0.0	0.0	0.0	0.0	0.0	0.0	0.0	0.0	0.0
F(334)	3.979307600477517e-05	L:3.979307600477517e-05	3.979307600477517e-05	0.0	0.0	0.0	0.0	0.0	0.0	0.0	0.0	0.0	0.0	0.0	0.0	0.0	0.0	0.0	0.0	0.0	0.0	0.0
L(329)	3.979307600477517e-05	I:3.979307600477517e-05	0.0	3.979307600477517e-05	0.0	0.0	0.0	0.0	0.0	0.0	0.0	0.0	0.0	0.0	0.0	0.0	0.0	0.0	0.0	0.0	0.0	0.0
L(240)	3.979307600477517e-05	V:3.979307600477517e-05	0.0	0.0	3.979307600477517e-05	0.0	0.0	0.0	0.0	0.0	0.0	0.0	0.0	0.0	0.0	0.0	0.0	0.0	0.0	0.0	0.0	0.0
D(3)	3.979307600477517e-05	G:3.979307600477517e-05	0.0	0.0	0.0	0.0	0.0	0.0	0.0	0.0	0.0	0.0	0.0	3.979307600477517e-05	0.0	0.0	0.0	0.0	0.0	0.0	0.0	0.0
T(929)	3.979307600477517e-05	I:3.979307600477517e-05	0.0	3.979307600477517e-05	0.0	0.0	0.0	0.0	0.0	0.0	0.0	0.0	0.0	0.0	0.0	0.0	0.0	0.0	0.0	0.0	0.0	0.0
R(331)	3.979307600477517e-05	N:3.979307600477517e-05	0.0	0.0	0.0	0.0	0.0	0.0	0.0	0.0	3.979307600477517e-05	0.0	0.0	0.0	0.0	0.0	0.0	0.0	0.0	0.0	0.0	0.0
Y(746)	3.979307600477517e-05	C:3.979307600477517e-05	0.0	0.0	0.0	0.0	3.979307600477517e-05	0.0	0.0	0.0	0.0	0.0	0.0	0.0	0.0	0.0	0.0	0.0	0.0	0.0	0.0	0.0
N(52)	3.979307600477517e-05	T:3.979307600477517e-05	0.0	0.0	0.0	0.0	0.0	0.0	0.0	0.0	0.0	0.0	0.0	0.0	3.979307600477517e-05	0.0	0.0	0.0	0.0	0.0	0.0	0.0
V(930)	3.979307600477517e-05	C:3.979307600477517e-05	0.0	0.0	0.0	0.0	3.979307600477517e-05	0.0	0.0	0.0	0.0	0.0	0.0	0.0	0.0	0.0	0.0	0.0	0.0	0.0	0.0	0.0
E(796)	3.979307600477517e-05	D:3.979307600477517e-05	0.0	0.0	0.0	0.0	0.0	0.0	0.0	0.0	0.0	0.0	0.0	0.0	0.0	3.979307600477517e-05	0.0	0.0	0.0	0.0	0.0	0.0
S(549)	3.979307600477517e-05	N:3.979307600477517e-05	0.0	0.0	0.0	0.0	0.0	0.0	0.0	0.0	3.979307600477517e-05	0.0	0.0	0.0	0.0	0.0	0.0	0.0	0.0	0.0	0.0	0.0
L(65)	3.979307600477517e-05	S:3.979307600477517e-05	0.0	0.0	0.0	3.979307600477517e-05	0.0	0.0	0.0	0.0	0.0	0.0	0.0	0.0	0.0	0.0	0.0	0.0	0.0	0.0	0.0	0.0
A(550)	3.979307600477517e-05	S:3.979307600477517e-05	0.0	0.0	0.0	3.979307600477517e-05	0.0	0.0	0.0	0.0	0.0	0.0	0.0	0.0	0.0	0.0	0.0	0.0	0.0	0.0	0.0	0.0
I(66)	3.979307600477517e-05	V:3.979307600477517e-05	0.0	0.0	3.979307600477517e-05	0.0	0.0	0.0	0.0	0.0	0.0	0.0	0.0	0.0	0.0	0.0	0.0	0.0	0.0	0.0	0.0	0.0
T(567)	3.979307600477517e-05	P:3.979307600477517e-05	0.0	0.0	0.0	0.0	0.0	0.0	0.0	0.0	0.0	0.0	0.0	0.0	0.0	0.0	0.0	0.0	0.0	3.979307600477517e-05	0.0	0.0
I(333)	3.979307600477517e-05	M:3.979307600477517e-05	0.0	0.0	0.0	0.0	0.0	0.0	0.0	0.0	0.0	0.0	0.0	0.0	0.0	0.0	3.979307600477517e-05	0.0	0.0	0.0	0.0	0.0
E(894)	3.979307600477517e-05	D:3.979307600477517e-05	0.0	0.0	0.0	0.0	0.0	0.0	0.0	0.0	0.0	0.0	0.0	0.0	0.0	3.979307600477517e-05	0.0	0.0	0.0	0.0	0.0	0.0
P(627)	3.979307600477517e-05	S:3.979307600477517e-05	0.0	0.0	0.0	3.979307600477517e-05	0.0	0.0	0.0	0.0	0.0	0.0	0.0	0.0	0.0	0.0	0.0	0.0	0.0	0.0	0.0	0.0
S(795)	3.979307600477517e-05	F:3.979307600477517e-05	0.0	0.0	0.0	0.0	0.0	0.0	0.0	0.0	0.0	0.0	3.979307600477517e-05	0.0	0.0	0.0	0.0	0.0	0.0	0.0	0.0	0.0
F(745)	3.979307600477517e-05	V:3.979307600477517e-05	0.0	0.0	3.979307600477517e-05	0.0	0.0	0.0	0.0	0.0	0.0	0.0	0.0	0.0	0.0	0.0	0.0	0.0	0.0	0.0	0.0	0.0
C(813)	0.0		0.0	0.0	0.0	0.0	0.0	0.0	0.0	0.0	0.0	0.0	0.0	0.0	0.0	0.0	0.0	0.0	0.0	0.0	0.0	0.0
F(812)	0.0		0.0	0.0	0.0	0.0	0.0	0.0	0.0	0.0	0.0	0.0	0.0	0.0	0.0	0.0	0.0	0.0	0.0	0.0	0.0	0.0
S(814)	0.0		0.0	0.0	0.0	0.0	0.0	0.0	0.0	0.0	0.0	0.0	0.0	0.0	0.0	0.0	0.0	0.0	0.0	0.0	0.0	0.0
W(268)	0.0		0.0	0.0	0.0	0.0	0.0	0.0	0.0	0.0	0.0	0.0	0.0	0.0	0.0	0.0	0.0	0.0	0.0	0.0	0.0	0.0
E(811)	0.0		0.0	0.0	0.0	0.0	0.0	0.0	0.0	0.0	0.0	0.0	0.0	0.0	0.0	0.0	0.0	0.0	0.0	0.0	0.0	0.0
I(266)	0.0		0.0	0.0	0.0	0.0	0.0	0.0	0.0	0.0	0.0	0.0	0.0	0.0	0.0	0.0	0.0	0.0	0.0	0.0	0.0	0.0
Y(265)	0.0		0.0	0.0	0.0	0.0	0.0	0.0	0.0	0.0	0.0	0.0	0.0	0.0	0.0	0.0	0.0	0.0	0.0	0.0	0.0	0.0
G(200)	0.0		0.0	0.0	0.0	0.0	0.0	0.0	0.0	0.0	0.0	0.0	0.0	0.0	0.0	0.0	0.0	0.0	0.0	0.0	0.0	0.0
A(777)	0.0		0.0	0.0	0.0	0.0	0.0	0.0	0.0	0.0	0.0	0.0	0.0	0.0	0.0	0.0	0.0	0.0	0.0	0.0	0.0	0.0
S(778)	0.0		0.0	0.0	0.0	0.0	0.0	0.0	0.0	0.0	0.0	0.0	0.0	0.0	0.0	0.0	0.0	0.0	0.0	0.0	0.0	0.0
E(180)	0.0		0.0	0.0	0.0	0.0	0.0	0.0	0.0	0.0	0.0	0.0	0.0	0.0	0.0	0.0	0.0	0.0	0.0	0.0	0.0	0.0
N(767)	0.0		0.0	0.0	0.0	0.0	0.0	0.0	0.0	0.0	0.0	0.0	0.0	0.0	0.0	0.0	0.0	0.0	0.0	0.0	0.0	0.0
Q(815)	0.0		0.0	0.0	0.0	0.0	0.0	0.0	0.0	0.0	0.0	0.0	0.0	0.0	0.0	0.0	0.0	0.0	0.0	0.0	0.0	0.0
V(820)	0.0		0.0	0.0	0.0	0.0	0.0	0.0	0.0	0.0	0.0	0.0	0.0	0.0	0.0	0.0	0.0	0.0	0.0	0.0	0.0	0.0
F(766)	0.0		0.0	0.0	0.0	0.0	0.0	0.0	0.0	0.0	0.0	0.0	0.0	0.0	0.0	0.0	0.0	0.0	0.0	0.0	0.0	0.0
L(187)	0.0		0.0	0.0	0.0	0.0	0.0	0.0	0.0	0.0	0.0	0.0	0.0	0.0	0.0	0.0	0.0	0.0	0.0	0.0	0.0	0.0
D(274)	0.0		0.0	0.0	0.0	0.0	0.0	0.0	0.0	0.0	0.0	0.0	0.0	0.0	0.0	0.0	0.0	0.0	0.0	0.0	0.0	0.0
Y(770)	0.0		0.0	0.0	0.0	0.0	0.0	0.0	0.0	0.0	0.0	0.0	0.0	0.0	0.0	0.0	0.0	0.0	0.0	0.0	0.0	0.0
K(272)	0.0		0.0	0.0	0.0	0.0	0.0	0.0	0.0	0.0	0.0	0.0	0.0	0.0	0.0	0.0	0.0	0.0	0.0	0.0	0.0	0.0
K(188)	0.0		0.0	0.0	0.0	0.0	0.0	0.0	0.0	0.0	0.0	0.0	0.0	0.0	0.0	0.0	0.0	0.0	0.0	0.0	0.0	0.0
T(189)	0.0		0.0	0.0	0.0	0.0	0.0	0.0	0.0	0.0	0.0	0.0	0.0	0.0	0.0	0.0	0.0	0.0	0.0	0.0	0.0	0.0
V(827)	0.0		0.0	0.0	0.0	0.0	0.0	0.0	0.0	0.0	0.0	0.0	0.0	0.0	0.0	0.0	0.0	0.0	0.0	0.0	0.0	0.0
L(819)	0.0		0.0	0.0	0.0	0.0	0.0	0.0	0.0	0.0	0.0	0.0	0.0	0.0	0.0	0.0	0.0	0.0	0.0	0.0	0.0	0.0
Q(191)	0.0		0.0	0.0	0.0	0.0	0.0	0.0	0.0	0.0	0.0	0.0	0.0	0.0	0.0	0.0	0.0	0.0	0.0	0.0	0.0	0.0
Y(826)	0.0		0.0	0.0	0.0	0.0	0.0	0.0	0.0	0.0	0.0	0.0	0.0	0.0	0.0	0.0	0.0	0.0	0.0	0.0	0.0	0.0
L(775)	0.0		0.0	0.0	0.0	0.0	0.0	0.0	0.0	0.0	0.0	0.0	0.0	0.0	0.0	0.0	0.0	0.0	0.0	0.0	0.0	0.0
T(817)	0.0		0.0	0.0	0.0	0.0	0.0	0.0	0.0	0.0	0.0	0.0	0.0	0.0	0.0	0.0	0.0	0.0	0.0	0.0	0.0	0.0
H(816)	0.0		0.0	0.0	0.0	0.0	0.0	0.0	0.0	0.0	0.0	0.0	0.0	0.0	0.0	0.0	0.0	0.0	0.0	0.0	0.0	0.0
Y(237)	0.0		0.0	0.0	0.0	0.0	0.0	0.0	0.0	0.0	0.0	0.0	0.0	0.0	0.0	0.0	0.0	0.0	0.0	0.0	0.0	0.0
Y(788)	0.0		0.0	0.0	0.0	0.0	0.0	0.0	0.0	0.0	0.0	0.0	0.0	0.0	0.0	0.0	0.0	0.0	0.0	0.0	0.0	0.0
V(202)	0.0		0.0	0.0	0.0	0.0	0.0	0.0	0.0	0.0	0.0	0.0	0.0	0.0	0.0	0.0	0.0	0.0	0.0	0.0	0.0	0.0
F(793)	0.0		0.0	0.0	0.0	0.0	0.0	0.0	0.0	0.0	0.0	0.0	0.0	0.0	0.0	0.0	0.0	0.0	0.0	0.0	0.0	0.0
N(790)	0.0		0.0	0.0	0.0	0.0	0.0	0.0	0.0	0.0	0.0	0.0	0.0	0.0	0.0	0.0	0.0	0.0	0.0	0.0	0.0	0.0
F(219)	0.0		0.0	0.0	0.0	0.0	0.0	0.0	0.0	0.0	0.0	0.0	0.0	0.0	0.0	0.0	0.0	0.0	0.0	0.0	0.0	0.0
G(220)	0.0		0.0	0.0	0.0	0.0	0.0	0.0	0.0	0.0	0.0	0.0	0.0	0.0	0.0	0.0	0.0	0.0	0.0	0.0	0.0	0.0
D(221)	0.0		0.0	0.0	0.0	0.0	0.0	0.0	0.0	0.0	0.0	0.0	0.0	0.0	0.0	0.0	0.0	0.0	0.0	0.0	0.0	0.0
L(805)	0.0		0.0	0.0	0.0	0.0	0.0	0.0	0.0	0.0	0.0	0.0	0.0	0.0	0.0	0.0	0.0	0.0	0.0	0.0	0.0	0.0
I(223)	0.0		0.0	0.0	0.0	0.0	0.0	0.0	0.0	0.0	0.0	0.0	0.0	0.0	0.0	0.0	0.0	0.0	0.0	0.0	0.0	0.0
Q(224)	0.0		0.0	0.0	0.0	0.0	0.0	0.0	0.0	0.0	0.0	0.0	0.0	0.0	0.0	0.0	0.0	0.0	0.0	0.0	0.0	0.0
N(791)	0.0		0.0	0.0	0.0	0.0	0.0	0.0	0.0	0.0	0.0	0.0	0.0	0.0	0.0	0.0	0.0	0.0	0.0	0.0	0.0	0.0
V(792)	0.0		0.0	0.0	0.0	0.0	0.0	0.0	0.0	0.0	0.0	0.0	0.0	0.0	0.0	0.0	0.0	0.0	0.0	0.0	0.0	0.0
M(794)	0.0		0.0	0.0	0.0	0.0	0.0	0.0	0.0	0.0	0.0	0.0	0.0	0.0	0.0	0.0	0.0	0.0	0.0	0.0	0.0	0.0
I(779)	0.0		0.0	0.0	0.0	0.0	0.0	0.0	0.0	0.0	0.0	0.0	0.0	0.0	0.0	0.0	0.0	0.0	0.0	0.0	0.0	0.0
W(800)	0.0		0.0	0.0	0.0	0.0	0.0	0.0	0.0	0.0	0.0	0.0	0.0	0.0	0.0	0.0	0.0	0.0	0.0	0.0	0.0	0.0
P(243)	0.0		0.0	0.0	0.0	0.0	0.0	0.0	0.0	0.0	0.0	0.0	0.0	0.0	0.0	0.0	0.0	0.0	0.0	0.0	0.0	0.0
G(230)	0.0		0.0	0.0	0.0	0.0	0.0	0.0	0.0	0.0	0.0	0.0	0.0	0.0	0.0	0.0	0.0	0.0	0.0	0.0	0.0	0.0
L(178)	0.0		0.0	0.0	0.0	0.0	0.0	0.0	0.0	0.0	0.0	0.0	0.0	0.0	0.0	0.0	0.0	0.0	0.0	0.0	0.0	0.0
L(241)	0.0		0.0	0.0	0.0	0.0	0.0	0.0	0.0	0.0	0.0	0.0	0.0	0.0	0.0	0.0	0.0	0.0	0.0	0.0	0.0	0.0
K(798)	0.0		0.0	0.0	0.0	0.0	0.0	0.0	0.0	0.0	0.0	0.0	0.0	0.0	0.0	0.0	0.0	0.0	0.0	0.0	0.0	0.0
D(235)	0.0		0.0	0.0	0.0	0.0	0.0	0.0	0.0	0.0	0.0	0.0	0.0	0.0	0.0	0.0	0.0	0.0	0.0	0.0	0.0	0.0
S(239)	0.0		0.0	0.0	0.0	0.0	0.0	0.0	0.0	0.0	0.0	0.0	0.0	0.0	0.0	0.0	0.0	0.0	0.0	0.0	0.0	0.0
S(236)	0.0		0.0	0.0	0.0	0.0	0.0	0.0	0.0	0.0	0.0	0.0	0.0	0.0	0.0	0.0	0.0	0.0	0.0	0.0	0.0	0.0
D(218)	0.0		0.0	0.0	0.0	0.0	0.0	0.0	0.0	0.0	0.0	0.0	0.0	0.0	0.0	0.0	0.0	0.0	0.0	0.0	0.0	0.0
Y(217)	0.0		0.0	0.0	0.0	0.0	0.0	0.0	0.0	0.0	0.0	0.0	0.0	0.0	0.0	0.0	0.0	0.0	0.0	0.0	0.0	0.0
W(216)	0.0		0.0	0.0	0.0	0.0	0.0	0.0	0.0	0.0	0.0	0.0	0.0	0.0	0.0	0.0	0.0	0.0	0.0	0.0	0.0	0.0
K(807)	0.0		0.0	0.0	0.0	0.0	0.0	0.0	0.0	0.0	0.0	0.0	0.0	0.0	0.0	0.0	0.0	0.0	0.0	0.0	0.0	0.0
G(203)	0.0		0.0	0.0	0.0	0.0	0.0	0.0	0.0	0.0	0.0	0.0	0.0	0.0	0.0	0.0	0.0	0.0	0.0	0.0	0.0	0.0
L(261)	0.0		0.0	0.0	0.0	0.0	0.0	0.0	0.0	0.0	0.0	0.0	0.0	0.0	0.0	0.0	0.0	0.0	0.0	0.0	0.0	0.0
S(784)	0.0		0.0	0.0	0.0	0.0	0.0	0.0	0.0	0.0	0.0	0.0	0.0	0.0	0.0	0.0	0.0	0.0	0.0	0.0	0.0	0.0
V(785)	0.0		0.0	0.0	0.0	0.0	0.0	0.0	0.0	0.0	0.0	0.0	0.0	0.0	0.0	0.0	0.0	0.0	0.0	0.0	0.0	0.0
L(786)	0.0		0.0	0.0	0.0	0.0	0.0	0.0	0.0	0.0	0.0	0.0	0.0	0.0	0.0	0.0	0.0	0.0	0.0	0.0	0.0	0.0
V(204)	0.0		0.0	0.0	0.0	0.0	0.0	0.0	0.0	0.0	0.0	0.0	0.0	0.0	0.0	0.0	0.0	0.0	0.0	0.0	0.0	0.0
Y(787)	0.0		0.0	0.0	0.0	0.0	0.0	0.0	0.0	0.0	0.0	0.0	0.0	0.0	0.0	0.0	0.0	0.0	0.0	0.0	0.0	0.0
L(205)	0.0		0.0	0.0	0.0	0.0	0.0	0.0	0.0	0.0	0.0	0.0	0.0	0.0	0.0	0.0	0.0	0.0	0.0	0.0	0.0	0.0
L(207)	0.0		0.0	0.0	0.0	0.0	0.0	0.0	0.0	0.0	0.0	0.0	0.0	0.0	0.0	0.0	0.0	0.0	0.0	0.0	0.0	0.0
D(208)	0.0		0.0	0.0	0.0	0.0	0.0	0.0	0.0	0.0	0.0	0.0	0.0	0.0	0.0	0.0	0.0	0.0	0.0	0.0	0.0	0.0
N(209)	0.0		0.0	0.0	0.0	0.0	0.0	0.0	0.0	0.0	0.0	0.0	0.0	0.0	0.0	0.0	0.0	0.0	0.0	0.0	0.0	0.0
Q(210)	0.0		0.0	0.0	0.0	0.0	0.0	0.0	0.0	0.0	0.0	0.0	0.0	0.0	0.0	0.0	0.0	0.0	0.0	0.0	0.0	0.0
D(211)	0.0		0.0	0.0	0.0	0.0	0.0	0.0	0.0	0.0	0.0	0.0	0.0	0.0	0.0	0.0	0.0	0.0	0.0	0.0	0.0	0.0
P(809)	0.0		0.0	0.0	0.0	0.0	0.0	0.0	0.0	0.0	0.0	0.0	0.0	0.0	0.0	0.0	0.0	0.0	0.0	0.0	0.0	0.0
A(253)	0.0		0.0	0.0	0.0	0.0	0.0	0.0	0.0	0.0	0.0	0.0	0.0	0.0	0.0	0.0	0.0	0.0	0.0	0.0	0.0	0.0
G(808)	0.0		0.0	0.0	0.0	0.0	0.0	0.0	0.0	0.0	0.0	0.0	0.0	0.0	0.0	0.0	0.0	0.0	0.0	0.0	0.0	0.0
L(251)	0.0		0.0	0.0	0.0	0.0	0.0	0.0	0.0	0.0	0.0	0.0	0.0	0.0	0.0	0.0	0.0	0.0	0.0	0.0	0.0	0.0
G(214)	0.0		0.0	0.0	0.0	0.0	0.0	0.0	0.0	0.0	0.0	0.0	0.0	0.0	0.0	0.0	0.0	0.0	0.0	0.0	0.0	0.0
Q(789)	0.0		0.0	0.0	0.0	0.0	0.0	0.0	0.0	0.0	0.0	0.0	0.0	0.0	0.0	0.0	0.0	0.0	0.0	0.0	0.0	0.0
Y(828)	0.0		0.0	0.0	0.0	0.0	0.0	0.0	0.0	0.0	0.0	0.0	0.0	0.0	0.0	0.0	0.0	0.0	0.0	0.0	0.0	0.0
E(144)	0.0		0.0	0.0	0.0	0.0	0.0	0.0	0.0	0.0	0.0	0.0	0.0	0.0	0.0	0.0	0.0	0.0	0.0	0.0	0.0	0.0
P(832)	0.0		0.0	0.0	0.0	0.0	0.0	0.0	0.0	0.0	0.0	0.0	0.0	0.0	0.0	0.0	0.0	0.0	0.0	0.0	0.0	0.0
R(55)	0.0		0.0	0.0	0.0	0.0	0.0	0.0	0.0	0.0	0.0	0.0	0.0	0.0	0.0	0.0	0.0	0.0	0.0	0.0	0.0	0.0
G(897)	0.0		0.0	0.0	0.0	0.0	0.0	0.0	0.0	0.0	0.0	0.0	0.0	0.0	0.0	0.0	0.0	0.0	0.0	0.0	0.0	0.0
H(898)	0.0		0.0	0.0	0.0	0.0	0.0	0.0	0.0	0.0	0.0	0.0	0.0	0.0	0.0	0.0	0.0	0.0	0.0	0.0	0.0	0.0
M(899)	0.0		0.0	0.0	0.0	0.0	0.0	0.0	0.0	0.0	0.0	0.0	0.0	0.0	0.0	0.0	0.0	0.0	0.0	0.0	0.0	0.0
L(900)	0.0		0.0	0.0	0.0	0.0	0.0	0.0	0.0	0.0	0.0	0.0	0.0	0.0	0.0	0.0	0.0	0.0	0.0	0.0	0.0	0.0
E(58)	0.0		0.0	0.0	0.0	0.0	0.0	0.0	0.0	0.0	0.0	0.0	0.0	0.0	0.0	0.0	0.0	0.0	0.0	0.0	0.0	0.0
D(901)	0.0		0.0	0.0	0.0	0.0	0.0	0.0	0.0	0.0	0.0	0.0	0.0	0.0	0.0	0.0	0.0	0.0	0.0	0.0	0.0	0.0
C(54)	0.0		0.0	0.0	0.0	0.0	0.0	0.0	0.0	0.0	0.0	0.0	0.0	0.0	0.0	0.0	0.0	0.0	0.0	0.0	0.0	0.0
Y(175)	0.0		0.0	0.0	0.0	0.0	0.0	0.0	0.0	0.0	0.0	0.0	0.0	0.0	0.0	0.0	0.0	0.0	0.0	0.0	0.0	0.0
C(53)	0.0		0.0	0.0	0.0	0.0	0.0	0.0	0.0	0.0	0.0	0.0	0.0	0.0	0.0	0.0	0.0	0.0	0.0	0.0	0.0	0.0
M(902)	0.0		0.0	0.0	0.0	0.0	0.0	0.0	0.0	0.0	0.0	0.0	0.0	0.0	0.0	0.0	0.0	0.0	0.0	0.0	0.0	0.0
K(50)	0.0		0.0	0.0	0.0	0.0	0.0	0.0	0.0	0.0	0.0	0.0	0.0	0.0	0.0	0.0	0.0	0.0	0.0	0.0	0.0	0.0
L(49)	0.0		0.0	0.0	0.0	0.0	0.0	0.0	0.0	0.0	0.0	0.0	0.0	0.0	0.0	0.0	0.0	0.0	0.0	0.0	0.0	0.0
Y(903)	0.0		0.0	0.0	0.0	0.0	0.0	0.0	0.0	0.0	0.0	0.0	0.0	0.0	0.0	0.0	0.0	0.0	0.0	0.0	0.0	0.0
S(904)	0.0		0.0	0.0	0.0	0.0	0.0	0.0	0.0	0.0	0.0	0.0	0.0	0.0	0.0	0.0	0.0	0.0	0.0	0.0	0.0	0.0
T(896)	0.0		0.0	0.0	0.0	0.0	0.0	0.0	0.0	0.0	0.0	0.0	0.0	0.0	0.0	0.0	0.0	0.0	0.0	0.0	0.0	0.0
L(895)	0.0		0.0	0.0	0.0	0.0	0.0	0.0	0.0	0.0	0.0	0.0	0.0	0.0	0.0	0.0	0.0	0.0	0.0	0.0	0.0	0.0
Y(69)	0.0		0.0	0.0	0.0	0.0	0.0	0.0	0.0	0.0	0.0	0.0	0.0	0.0	0.0	0.0	0.0	0.0	0.0	0.0	0.0	0.0
F(70)	0.0		0.0	0.0	0.0	0.0	0.0	0.0	0.0	0.0	0.0	0.0	0.0	0.0	0.0	0.0	0.0	0.0	0.0	0.0	0.0	0.0
H(892)	0.0		0.0	0.0	0.0	0.0	0.0	0.0	0.0	0.0	0.0	0.0	0.0	0.0	0.0	0.0	0.0	0.0	0.0	0.0	0.0	0.0
V(72)	0.0		0.0	0.0	0.0	0.0	0.0	0.0	0.0	0.0	0.0	0.0	0.0	0.0	0.0	0.0	0.0	0.0	0.0	0.0	0.0	0.0
K(73)	0.0		0.0	0.0	0.0	0.0	0.0	0.0	0.0	0.0	0.0	0.0	0.0	0.0	0.0	0.0	0.0	0.0	0.0	0.0	0.0	0.0
R(74)	0.0		0.0	0.0	0.0	0.0	0.0	0.0	0.0	0.0	0.0	0.0	0.0	0.0	0.0	0.0	0.0	0.0	0.0	0.0	0.0	0.0
H(75)	0.0		0.0	0.0	0.0	0.0	0.0	0.0	0.0	0.0	0.0	0.0	0.0	0.0	0.0	0.0	0.0	0.0	0.0	0.0	0.0	0.0
L(891)	0.0		0.0	0.0	0.0	0.0	0.0	0.0	0.0	0.0	0.0	0.0	0.0	0.0	0.0	0.0	0.0	0.0	0.0	0.0	0.0	0.0
R(889)	0.0		0.0	0.0	0.0	0.0	0.0	0.0	0.0	0.0	0.0	0.0	0.0	0.0	0.0	0.0	0.0	0.0	0.0	0.0	0.0	0.0
N(79)	0.0		0.0	0.0	0.0	0.0	0.0	0.0	0.0	0.0	0.0	0.0	0.0	0.0	0.0	0.0	0.0	0.0	0.0	0.0	0.0	0.0
I(888)	0.0		0.0	0.0	0.0	0.0	0.0	0.0	0.0	0.0	0.0	0.0	0.0	0.0	0.0	0.0	0.0	0.0	0.0	0.0	0.0	0.0
Y(887)	0.0		0.0	0.0	0.0	0.0	0.0	0.0	0.0	0.0	0.0	0.0	0.0	0.0	0.0	0.0	0.0	0.0	0.0	0.0	0.0	0.0
Q(886)	0.0		0.0	0.0	0.0	0.0	0.0	0.0	0.0	0.0	0.0	0.0	0.0	0.0	0.0	0.0	0.0	0.0	0.0	0.0	0.0	0.0
L(885)	0.0		0.0	0.0	0.0	0.0	0.0	0.0	0.0	0.0	0.0	0.0	0.0	0.0	0.0	0.0	0.0	0.0	0.0	0.0	0.0	0.0
L(883)	0.0		0.0	0.0	0.0	0.0	0.0	0.0	0.0	0.0	0.0	0.0	0.0	0.0	0.0	0.0	0.0	0.0	0.0	0.0	0.0	0.0
F(45)	0.0		0.0	0.0	0.0	0.0	0.0	0.0	0.0	0.0	0.0	0.0	0.0	0.0	0.0	0.0	0.0	0.0	0.0	0.0	0.0	0.0
L(907)	0.0		0.0	0.0	0.0	0.0	0.0	0.0	0.0	0.0	0.0	0.0	0.0	0.0	0.0	0.0	0.0	0.0	0.0	0.0	0.0	0.0
K(41)	0.0		0.0	0.0	0.0	0.0	0.0	0.0	0.0	0.0	0.0	0.0	0.0	0.0	0.0	0.0	0.0	0.0	0.0	0.0	0.0	0.0
F(920)	0.0		0.0	0.0	0.0	0.0	0.0	0.0	0.0	0.0	0.0	0.0	0.0	0.0	0.0	0.0	0.0	0.0	0.0	0.0	0.0	0.0
Q(5)	0.0		0.0	0.0	0.0	0.0	0.0	0.0	0.0	0.0	0.0	0.0	0.0	0.0	0.0	0.0	0.0	0.0	0.0	0.0	0.0	0.0
P(927)	0.0		0.0	0.0	0.0	0.0	0.0	0.0	0.0	0.0	0.0	0.0	0.0	0.0	0.0	0.0	0.0	0.0	0.0	0.0	0.0	0.0
F(7)	0.0		0.0	0.0	0.0	0.0	0.0	0.0	0.0	0.0	0.0	0.0	0.0	0.0	0.0	0.0	0.0	0.0	0.0	0.0	0.0	0.0
L(8)	0.0		0.0	0.0	0.0	0.0	0.0	0.0	0.0	0.0	0.0	0.0	0.0	0.0	0.0	0.0	0.0	0.0	0.0	0.0	0.0	0.0
N(9)	0.0		0.0	0.0	0.0	0.0	0.0	0.0	0.0	0.0	0.0	0.0	0.0	0.0	0.0	0.0	0.0	0.0	0.0	0.0	0.0	0.0
R(10)	0.0		0.0	0.0	0.0	0.0	0.0	0.0	0.0	0.0	0.0	0.0	0.0	0.0	0.0	0.0	0.0	0.0	0.0	0.0	0.0	0.0
V(11)	0.0		0.0	0.0	0.0	0.0	0.0	0.0	0.0	0.0	0.0	0.0	0.0	0.0	0.0	0.0	0.0	0.0	0.0	0.0	0.0	0.0
Y(925)	0.0		0.0	0.0	0.0	0.0	0.0	0.0	0.0	0.0	0.0	0.0	0.0	0.0	0.0	0.0	0.0	0.0	0.0	0.0	0.0	0.0
G(13)	0.0		0.0	0.0	0.0	0.0	0.0	0.0	0.0	0.0	0.0	0.0	0.0	0.0	0.0	0.0	0.0	0.0	0.0	0.0	0.0	0.0
V(14)	0.0		0.0	0.0	0.0	0.0	0.0	0.0	0.0	0.0	0.0	0.0	0.0	0.0	0.0	0.0	0.0	0.0	0.0	0.0	0.0	0.0
M(924)	0.0		0.0	0.0	0.0	0.0	0.0	0.0	0.0	0.0	0.0	0.0	0.0	0.0	0.0	0.0	0.0	0.0	0.0	0.0	0.0	0.0
A(17)	0.0		0.0	0.0	0.0	0.0	0.0	0.0	0.0	0.0	0.0	0.0	0.0	0.0	0.0	0.0	0.0	0.0	0.0	0.0	0.0	0.0
L(19)	0.0		0.0	0.0	0.0	0.0	0.0	0.0	0.0	0.0	0.0	0.0	0.0	0.0	0.0	0.0	0.0	0.0	0.0	0.0	0.0	0.0
Y(921)	0.0		0.0	0.0	0.0	0.0	0.0	0.0	0.0	0.0	0.0	0.0	0.0	0.0	0.0	0.0	0.0	0.0	0.0	0.0	0.0	0.0
E(917)	0.0		0.0	0.0	0.0	0.0	0.0	0.0	0.0	0.0	0.0	0.0	0.0	0.0	0.0	0.0	0.0	0.0	0.0	0.0	0.0	0.0
N(39)	0.0		0.0	0.0	0.0	0.0	0.0	0.0	0.0	0.0	0.0	0.0	0.0	0.0	0.0	0.0	0.0	0.0	0.0	0.0	0.0	0.0
G(23)	0.0		0.0	0.0	0.0	0.0	0.0	0.0	0.0	0.0	0.0	0.0	0.0	0.0	0.0	0.0	0.0	0.0	0.0	0.0	0.0	0.0
T(24)	0.0		0.0	0.0	0.0	0.0	0.0	0.0	0.0	0.0	0.0	0.0	0.0	0.0	0.0	0.0	0.0	0.0	0.0	0.0	0.0	0.0
G(25)	0.0		0.0	0.0	0.0	0.0	0.0	0.0	0.0	0.0	0.0	0.0	0.0	0.0	0.0	0.0	0.0	0.0	0.0	0.0	0.0	0.0
Y(915)	0.0		0.0	0.0	0.0	0.0	0.0	0.0	0.0	0.0	0.0	0.0	0.0	0.0	0.0	0.0	0.0	0.0	0.0	0.0	0.0	0.0
T(28)	0.0		0.0	0.0	0.0	0.0	0.0	0.0	0.0	0.0	0.0	0.0	0.0	0.0	0.0	0.0	0.0	0.0	0.0	0.0	0.0	0.0
D(29)	0.0		0.0	0.0	0.0	0.0	0.0	0.0	0.0	0.0	0.0	0.0	0.0	0.0	0.0	0.0	0.0	0.0	0.0	0.0	0.0	0.0
V(30)	0.0		0.0	0.0	0.0	0.0	0.0	0.0	0.0	0.0	0.0	0.0	0.0	0.0	0.0	0.0	0.0	0.0	0.0	0.0	0.0	0.0
V(31)	0.0		0.0	0.0	0.0	0.0	0.0	0.0	0.0	0.0	0.0	0.0	0.0	0.0	0.0	0.0	0.0	0.0	0.0	0.0	0.0	0.0
Y(32)	0.0		0.0	0.0	0.0	0.0	0.0	0.0	0.0	0.0	0.0	0.0	0.0	0.0	0.0	0.0	0.0	0.0	0.0	0.0	0.0	0.0
R(33)	0.0		0.0	0.0	0.0	0.0	0.0	0.0	0.0	0.0	0.0	0.0	0.0	0.0	0.0	0.0	0.0	0.0	0.0	0.0	0.0	0.0
A(34)	0.0		0.0	0.0	0.0	0.0	0.0	0.0	0.0	0.0	0.0	0.0	0.0	0.0	0.0	0.0	0.0	0.0	0.0	0.0	0.0	0.0
D(36)	0.0		0.0	0.0	0.0	0.0	0.0	0.0	0.0	0.0	0.0	0.0	0.0	0.0	0.0	0.0	0.0	0.0	0.0	0.0	0.0	0.0
I(37)	0.0		0.0	0.0	0.0	0.0	0.0	0.0	0.0	0.0	0.0	0.0	0.0	0.0	0.0	0.0	0.0	0.0	0.0	0.0	0.0	0.0
T(912)	0.0		0.0	0.0	0.0	0.0	0.0	0.0	0.0	0.0	0.0	0.0	0.0	0.0	0.0	0.0	0.0	0.0	0.0	0.0	0.0	0.0
F(881)	0.0		0.0	0.0	0.0	0.0	0.0	0.0	0.0	0.0	0.0	0.0	0.0	0.0	0.0	0.0	0.0	0.0	0.0	0.0	0.0	0.0
L(89)	0.0		0.0	0.0	0.0	0.0	0.0	0.0	0.0	0.0	0.0	0.0	0.0	0.0	0.0	0.0	0.0	0.0	0.0	0.0	0.0	0.0
V(880)	0.0		0.0	0.0	0.0	0.0	0.0	0.0	0.0	0.0	0.0	0.0	0.0	0.0	0.0	0.0	0.0	0.0	0.0	0.0	0.0	0.0
D(846)	0.0		0.0	0.0	0.0	0.0	0.0	0.0	0.0	0.0	0.0	0.0	0.0	0.0	0.0	0.0	0.0	0.0	0.0	0.0	0.0	0.0
M(855)	0.0		0.0	0.0	0.0	0.0	0.0	0.0	0.0	0.0	0.0	0.0	0.0	0.0	0.0	0.0	0.0	0.0	0.0	0.0	0.0	0.0
C(139)	0.0		0.0	0.0	0.0	0.0	0.0	0.0	0.0	0.0	0.0	0.0	0.0	0.0	0.0	0.0	0.0	0.0	0.0	0.0	0.0	0.0
L(854)	0.0		0.0	0.0	0.0	0.0	0.0	0.0	0.0	0.0	0.0	0.0	0.0	0.0	0.0	0.0	0.0	0.0	0.0	0.0	0.0	0.0
T(853)	0.0		0.0	0.0	0.0	0.0	0.0	0.0	0.0	0.0	0.0	0.0	0.0	0.0	0.0	0.0	0.0	0.0	0.0	0.0	0.0	0.0
L(142)	0.0		0.0	0.0	0.0	0.0	0.0	0.0	0.0	0.0	0.0	0.0	0.0	0.0	0.0	0.0	0.0	0.0	0.0	0.0	0.0	0.0
I(145)	0.0		0.0	0.0	0.0	0.0	0.0	0.0	0.0	0.0	0.0	0.0	0.0	0.0	0.0	0.0	0.0	0.0	0.0	0.0	0.0	0.0
L(146)	0.0		0.0	0.0	0.0	0.0	0.0	0.0	0.0	0.0	0.0	0.0	0.0	0.0	0.0	0.0	0.0	0.0	0.0	0.0	0.0	0.0
G(852)	0.0		0.0	0.0	0.0	0.0	0.0	0.0	0.0	0.0	0.0	0.0	0.0	0.0	0.0	0.0	0.0	0.0	0.0	0.0	0.0	0.0
D(851)	0.0		0.0	0.0	0.0	0.0	0.0	0.0	0.0	0.0	0.0	0.0	0.0	0.0	0.0	0.0	0.0	0.0	0.0	0.0	0.0	0.0
T(850)	0.0		0.0	0.0	0.0	0.0	0.0	0.0	0.0	0.0	0.0	0.0	0.0	0.0	0.0	0.0	0.0	0.0	0.0	0.0	0.0	0.0
K(849)	0.0		0.0	0.0	0.0	0.0	0.0	0.0	0.0	0.0	0.0	0.0	0.0	0.0	0.0	0.0	0.0	0.0	0.0	0.0	0.0	0.0
C(151)	0.0		0.0	0.0	0.0	0.0	0.0	0.0	0.0	0.0	0.0	0.0	0.0	0.0	0.0	0.0	0.0	0.0	0.0	0.0	0.0	0.0
C(152)	0.0		0.0	0.0	0.0	0.0	0.0	0.0	0.0	0.0	0.0	0.0	0.0	0.0	0.0	0.0	0.0	0.0	0.0	0.0	0.0	0.0
I(847)	0.0		0.0	0.0	0.0	0.0	0.0	0.0	0.0	0.0	0.0	0.0	0.0	0.0	0.0	0.0	0.0	0.0	0.0	0.0	0.0	0.0
D(845)	0.0		0.0	0.0	0.0	0.0	0.0	0.0	0.0	0.0	0.0	0.0	0.0	0.0	0.0	0.0	0.0	0.0	0.0	0.0	0.0	0.0
F(134)	0.0		0.0	0.0	0.0	0.0	0.0	0.0	0.0	0.0	0.0	0.0	0.0	0.0	0.0	0.0	0.0	0.0	0.0	0.0	0.0	0.0
Y(156)	0.0		0.0	0.0	0.0	0.0	0.0	0.0	0.0	0.0	0.0	0.0	0.0	0.0	0.0	0.0	0.0	0.0	0.0	0.0	0.0	0.0
F(157)	0.0		0.0	0.0	0.0	0.0	0.0	0.0	0.0	0.0	0.0	0.0	0.0	0.0	0.0	0.0	0.0	0.0	0.0	0.0	0.0	0.0
V(844)	0.0		0.0	0.0	0.0	0.0	0.0	0.0	0.0	0.0	0.0	0.0	0.0	0.0	0.0	0.0	0.0	0.0	0.0	0.0	0.0	0.0
F(843)	0.0		0.0	0.0	0.0	0.0	0.0	0.0	0.0	0.0	0.0	0.0	0.0	0.0	0.0	0.0	0.0	0.0	0.0	0.0	0.0	0.0
C(842)	0.0		0.0	0.0	0.0	0.0	0.0	0.0	0.0	0.0	0.0	0.0	0.0	0.0	0.0	0.0	0.0	0.0	0.0	0.0	0.0	0.0
G(841)	0.0		0.0	0.0	0.0	0.0	0.0	0.0	0.0	0.0	0.0	0.0	0.0	0.0	0.0	0.0	0.0	0.0	0.0	0.0	0.0	0.0
F(165)	0.0		0.0	0.0	0.0	0.0	0.0	0.0	0.0	0.0	0.0	0.0	0.0	0.0	0.0	0.0	0.0	0.0	0.0	0.0	0.0	0.0
A(840)	0.0		0.0	0.0	0.0	0.0	0.0	0.0	0.0	0.0	0.0	0.0	0.0	0.0	0.0	0.0	0.0	0.0	0.0	0.0	0.0	0.0
G(839)	0.0		0.0	0.0	0.0	0.0	0.0	0.0	0.0	0.0	0.0	0.0	0.0	0.0	0.0	0.0	0.0	0.0	0.0	0.0	0.0	0.0
I(837)	0.0		0.0	0.0	0.0	0.0	0.0	0.0	0.0	0.0	0.0	0.0	0.0	0.0	0.0	0.0	0.0	0.0	0.0	0.0	0.0	0.0
R(836)	0.0		0.0	0.0	0.0	0.0	0.0	0.0	0.0	0.0	0.0	0.0	0.0	0.0	0.0	0.0	0.0	0.0	0.0	0.0	0.0	0.0
L(172)	0.0		0.0	0.0	0.0	0.0	0.0	0.0	0.0	0.0	0.0	0.0	0.0	0.0	0.0	0.0	0.0	0.0	0.0	0.0	0.0	0.0
S(835)	0.0		0.0	0.0	0.0	0.0	0.0	0.0	0.0	0.0	0.0	0.0	0.0	0.0	0.0	0.0	0.0	0.0	0.0	0.0	0.0	0.0
P(834)	0.0		0.0	0.0	0.0	0.0	0.0	0.0	0.0	0.0	0.0	0.0	0.0	0.0	0.0	0.0	0.0	0.0	0.0	0.0	0.0	0.0
E(136)	0.0		0.0	0.0	0.0	0.0	0.0	0.0	0.0	0.0	0.0	0.0	0.0	0.0	0.0	0.0	0.0	0.0	0.0	0.0	0.0	0.0
H(133)	0.0		0.0	0.0	0.0	0.0	0.0	0.0	0.0	0.0	0.0	0.0	0.0	0.0	0.0	0.0	0.0	0.0	0.0	0.0	0.0	0.0
Y(877)	0.0		0.0	0.0	0.0	0.0	0.0	0.0	0.0	0.0	0.0	0.0	0.0	0.0	0.0	0.0	0.0	0.0	0.0	0.0	0.0	0.0
V(111)	0.0		0.0	0.0	0.0	0.0	0.0	0.0	0.0	0.0	0.0	0.0	0.0	0.0	0.0	0.0	0.0	0.0	0.0	0.0	0.0	0.0
C(93)	0.0		0.0	0.0	0.0	0.0	0.0	0.0	0.0	0.0	0.0	0.0	0.0	0.0	0.0	0.0	0.0	0.0	0.0	0.0	0.0	0.0
K(98)	0.0		0.0	0.0	0.0	0.0	0.0	0.0	0.0	0.0	0.0	0.0	0.0	0.0	0.0	0.0	0.0	0.0	0.0	0.0	0.0	0.0
H(99)	0.0		0.0	0.0	0.0	0.0	0.0	0.0	0.0	0.0	0.0	0.0	0.0	0.0	0.0	0.0	0.0	0.0	0.0	0.0	0.0	0.0
D(100)	0.0		0.0	0.0	0.0	0.0	0.0	0.0	0.0	0.0	0.0	0.0	0.0	0.0	0.0	0.0	0.0	0.0	0.0	0.0	0.0	0.0
F(101)	0.0		0.0	0.0	0.0	0.0	0.0	0.0	0.0	0.0	0.0	0.0	0.0	0.0	0.0	0.0	0.0	0.0	0.0	0.0	0.0	0.0
F(102)	0.0		0.0	0.0	0.0	0.0	0.0	0.0	0.0	0.0	0.0	0.0	0.0	0.0	0.0	0.0	0.0	0.0	0.0	0.0	0.0	0.0
K(871)	0.0		0.0	0.0	0.0	0.0	0.0	0.0	0.0	0.0	0.0	0.0	0.0	0.0	0.0	0.0	0.0	0.0	0.0	0.0	0.0	0.0
F(104)	0.0		0.0	0.0	0.0	0.0	0.0	0.0	0.0	0.0	0.0	0.0	0.0	0.0	0.0	0.0	0.0	0.0	0.0	0.0	0.0	0.0
R(105)	0.0		0.0	0.0	0.0	0.0	0.0	0.0	0.0	0.0	0.0	0.0	0.0	0.0	0.0	0.0	0.0	0.0	0.0	0.0	0.0	0.0
P(868)	0.0		0.0	0.0	0.0	0.0	0.0	0.0	0.0	0.0	0.0	0.0	0.0	0.0	0.0	0.0	0.0	0.0	0.0	0.0	0.0	0.0
Y(867)	0.0		0.0	0.0	0.0	0.0	0.0	0.0	0.0	0.0	0.0	0.0	0.0	0.0	0.0	0.0	0.0	0.0	0.0	0.0	0.0	0.0
A(866)	0.0		0.0	0.0	0.0	0.0	0.0	0.0	0.0	0.0	0.0	0.0	0.0	0.0	0.0	0.0	0.0	0.0	0.0	0.0	0.0	0.0
D(865)	0.0		0.0	0.0	0.0	0.0	0.0	0.0	0.0	0.0	0.0	0.0	0.0	0.0	0.0	0.0	0.0	0.0	0.0	0.0	0.0	0.0
I(864)	0.0		0.0	0.0	0.0	0.0	0.0	0.0	0.0	0.0	0.0	0.0	0.0	0.0	0.0	0.0	0.0	0.0	0.0	0.0	0.0	0.0
A(863)	0.0		0.0	0.0	0.0	0.0	0.0	0.0	0.0	0.0	0.0	0.0	0.0	0.0	0.0	0.0	0.0	0.0	0.0	0.0	0.0	0.0
L(131)	0.0		0.0	0.0	0.0	0.0	0.0	0.0	0.0	0.0	0.0	0.0	0.0	0.0	0.0	0.0	0.0	0.0	0.0	0.0	0.0	0.0
H(113)	0.0		0.0	0.0	0.0	0.0	0.0	0.0	0.0	0.0	0.0	0.0	0.0	0.0	0.0	0.0	0.0	0.0	0.0	0.0	0.0	0.0
S(115)	0.0		0.0	0.0	0.0	0.0	0.0	0.0	0.0	0.0	0.0	0.0	0.0	0.0	0.0	0.0	0.0	0.0	0.0	0.0	0.0	0.0
R(116)	0.0		0.0	0.0	0.0	0.0	0.0	0.0	0.0	0.0	0.0	0.0	0.0	0.0	0.0	0.0	0.0	0.0	0.0	0.0	0.0	0.0
Q(117)	0.0		0.0	0.0	0.0	0.0	0.0	0.0	0.0	0.0	0.0	0.0	0.0	0.0	0.0	0.0	0.0	0.0	0.0	0.0	0.0	0.0
L(862)	0.0		0.0	0.0	0.0	0.0	0.0	0.0	0.0	0.0	0.0	0.0	0.0	0.0	0.0	0.0	0.0	0.0	0.0	0.0	0.0	0.0
T(120)	0.0		0.0	0.0	0.0	0.0	0.0	0.0	0.0	0.0	0.0	0.0	0.0	0.0	0.0	0.0	0.0	0.0	0.0	0.0	0.0	0.0
S(861)	0.0		0.0	0.0	0.0	0.0	0.0	0.0	0.0	0.0	0.0	0.0	0.0	0.0	0.0	0.0	0.0	0.0	0.0	0.0	0.0	0.0
V(860)	0.0		0.0	0.0	0.0	0.0	0.0	0.0	0.0	0.0	0.0	0.0	0.0	0.0	0.0	0.0	0.0	0.0	0.0	0.0	0.0	0.0
T(123)	0.0		0.0	0.0	0.0	0.0	0.0	0.0	0.0	0.0	0.0	0.0	0.0	0.0	0.0	0.0	0.0	0.0	0.0	0.0	0.0	0.0
F(859)	0.0		0.0	0.0	0.0	0.0	0.0	0.0	0.0	0.0	0.0	0.0	0.0	0.0	0.0	0.0	0.0	0.0	0.0	0.0	0.0	0.0
A(125)	0.0		0.0	0.0	0.0	0.0	0.0	0.0	0.0	0.0	0.0	0.0	0.0	0.0	0.0	0.0	0.0	0.0	0.0	0.0	0.0	0.0
D(126)	0.0		0.0	0.0	0.0	0.0	0.0	0.0	0.0	0.0	0.0	0.0	0.0	0.0	0.0	0.0	0.0	0.0	0.0	0.0	0.0	0.0
R(858)	0.0		0.0	0.0	0.0	0.0	0.0	0.0	0.0	0.0	0.0	0.0	0.0	0.0	0.0	0.0	0.0	0.0	0.0	0.0	0.0	0.0
E(857)	0.0		0.0	0.0	0.0	0.0	0.0	0.0	0.0	0.0	0.0	0.0	0.0	0.0	0.0	0.0	0.0	0.0	0.0	0.0	0.0	0.0
L(280)	0.0		0.0	0.0	0.0	0.0	0.0	0.0	0.0	0.0	0.0	0.0	0.0	0.0	0.0	0.0	0.0	0.0	0.0	0.0	0.0	0.0
A(634)	0.0		0.0	0.0	0.0	0.0	0.0	0.0	0.0	0.0	0.0	0.0	0.0	0.0	0.0	0.0	0.0	0.0	0.0	0.0	0.0	0.0
C(765)	0.0		0.0	0.0	0.0	0.0	0.0	0.0	0.0	0.0	0.0	0.0	0.0	0.0	0.0	0.0	0.0	0.0	0.0	0.0	0.0	0.0
Y(516)	0.0		0.0	0.0	0.0	0.0	0.0	0.0	0.0	0.0	0.0	0.0	0.0	0.0	0.0	0.0	0.0	0.0	0.0	0.0	0.0	0.0
D(523)	0.0		0.0	0.0	0.0	0.0	0.0	0.0	0.0	0.0	0.0	0.0	0.0	0.0	0.0	0.0	0.0	0.0	0.0	0.0	0.0	0.0
C(669)	0.0		0.0	0.0	0.0	0.0	0.0	0.0	0.0	0.0	0.0	0.0	0.0	0.0	0.0	0.0	0.0	0.0	0.0	0.0	0.0	0.0
S(672)	0.0		0.0	0.0	0.0	0.0	0.0	0.0	0.0	0.0	0.0	0.0	0.0	0.0	0.0	0.0	0.0	0.0	0.0	0.0	0.0	0.0
L(673)	0.0		0.0	0.0	0.0	0.0	0.0	0.0	0.0	0.0	0.0	0.0	0.0	0.0	0.0	0.0	0.0	0.0	0.0	0.0	0.0	0.0
S(518)	0.0		0.0	0.0	0.0	0.0	0.0	0.0	0.0	0.0	0.0	0.0	0.0	0.0	0.0	0.0	0.0	0.0	0.0	0.0	0.0	0.0
D(517)	0.0		0.0	0.0	0.0	0.0	0.0	0.0	0.0	0.0	0.0	0.0	0.0	0.0	0.0	0.0	0.0	0.0	0.0	0.0	0.0	0.0
Y(515)	0.0		0.0	0.0	0.0	0.0	0.0	0.0	0.0	0.0	0.0	0.0	0.0	0.0	0.0	0.0	0.0	0.0	0.0	0.0	0.0	0.0
D(525)	0.0		0.0	0.0	0.0	0.0	0.0	0.0	0.0	0.0	0.0	0.0	0.0	0.0	0.0	0.0	0.0	0.0	0.0	0.0	0.0	0.0
Y(674)	0.0		0.0	0.0	0.0	0.0	0.0	0.0	0.0	0.0	0.0	0.0	0.0	0.0	0.0	0.0	0.0	0.0	0.0	0.0	0.0	0.0
R(513)	0.0		0.0	0.0	0.0	0.0	0.0	0.0	0.0	0.0	0.0	0.0	0.0	0.0	0.0	0.0	0.0	0.0	0.0	0.0	0.0	0.0
A(512)	0.0		0.0	0.0	0.0	0.0	0.0	0.0	0.0	0.0	0.0	0.0	0.0	0.0	0.0	0.0	0.0	0.0	0.0	0.0	0.0	0.0
K(511)	0.0		0.0	0.0	0.0	0.0	0.0	0.0	0.0	0.0	0.0	0.0	0.0	0.0	0.0	0.0	0.0	0.0	0.0	0.0	0.0	0.0
G(510)	0.0		0.0	0.0	0.0	0.0	0.0	0.0	0.0	0.0	0.0	0.0	0.0	0.0	0.0	0.0	0.0	0.0	0.0	0.0	0.0	0.0
W(509)	0.0		0.0	0.0	0.0	0.0	0.0	0.0	0.0	0.0	0.0	0.0	0.0	0.0	0.0	0.0	0.0	0.0	0.0	0.0	0.0	0.0
Q(524)	0.0		0.0	0.0	0.0	0.0	0.0	0.0	0.0	0.0	0.0	0.0	0.0	0.0	0.0	0.0	0.0	0.0	0.0	0.0	0.0	0.0
F(528)	0.0		0.0	0.0	0.0	0.0	0.0	0.0	0.0	0.0	0.0	0.0	0.0	0.0	0.0	0.0	0.0	0.0	0.0	0.0	0.0	0.0
V(764)	0.0		0.0	0.0	0.0	0.0	0.0	0.0	0.0	0.0	0.0	0.0	0.0	0.0	0.0	0.0	0.0	0.0	0.0	0.0	0.0	0.0
T(538)	0.0		0.0	0.0	0.0	0.0	0.0	0.0	0.0	0.0	0.0	0.0	0.0	0.0	0.0	0.0	0.0	0.0	0.0	0.0	0.0	0.0
Y(546)	0.0		0.0	0.0	0.0	0.0	0.0	0.0	0.0	0.0	0.0	0.0	0.0	0.0	0.0	0.0	0.0	0.0	0.0	0.0	0.0	0.0
K(545)	0.0		0.0	0.0	0.0	0.0	0.0	0.0	0.0	0.0	0.0	0.0	0.0	0.0	0.0	0.0	0.0	0.0	0.0	0.0	0.0	0.0
N(543)	0.0		0.0	0.0	0.0	0.0	0.0	0.0	0.0	0.0	0.0	0.0	0.0	0.0	0.0	0.0	0.0	0.0	0.0	0.0	0.0	0.0
Q(541)	0.0		0.0	0.0	0.0	0.0	0.0	0.0	0.0	0.0	0.0	0.0	0.0	0.0	0.0	0.0	0.0	0.0	0.0	0.0	0.0	0.0
T(540)	0.0		0.0	0.0	0.0	0.0	0.0	0.0	0.0	0.0	0.0	0.0	0.0	0.0	0.0	0.0	0.0	0.0	0.0	0.0	0.0	0.0
I(539)	0.0		0.0	0.0	0.0	0.0	0.0	0.0	0.0	0.0	0.0	0.0	0.0	0.0	0.0	0.0	0.0	0.0	0.0	0.0	0.0	0.0
P(537)	0.0		0.0	0.0	0.0	0.0	0.0	0.0	0.0	0.0	0.0	0.0	0.0	0.0	0.0	0.0	0.0	0.0	0.0	0.0	0.0	0.0
E(665)	0.0		0.0	0.0	0.0	0.0	0.0	0.0	0.0	0.0	0.0	0.0	0.0	0.0	0.0	0.0	0.0	0.0	0.0	0.0	0.0	0.0
L(663)	0.0		0.0	0.0	0.0	0.0	0.0	0.0	0.0	0.0	0.0	0.0	0.0	0.0	0.0	0.0	0.0	0.0	0.0	0.0	0.0	0.0
N(534)	0.0		0.0	0.0	0.0	0.0	0.0	0.0	0.0	0.0	0.0	0.0	0.0	0.0	0.0	0.0	0.0	0.0	0.0	0.0	0.0	0.0
R(533)	0.0		0.0	0.0	0.0	0.0	0.0	0.0	0.0	0.0	0.0	0.0	0.0	0.0	0.0	0.0	0.0	0.0	0.0	0.0	0.0	0.0
K(532)	0.0		0.0	0.0	0.0	0.0	0.0	0.0	0.0	0.0	0.0	0.0	0.0	0.0	0.0	0.0	0.0	0.0	0.0	0.0	0.0	0.0
T(531)	0.0		0.0	0.0	0.0	0.0	0.0	0.0	0.0	0.0	0.0	0.0	0.0	0.0	0.0	0.0	0.0	0.0	0.0	0.0	0.0	0.0
S(664)	0.0		0.0	0.0	0.0	0.0	0.0	0.0	0.0	0.0	0.0	0.0	0.0	0.0	0.0	0.0	0.0	0.0	0.0	0.0	0.0	0.0
K(508)	0.0		0.0	0.0	0.0	0.0	0.0	0.0	0.0	0.0	0.0	0.0	0.0	0.0	0.0	0.0	0.0	0.0	0.0	0.0	0.0	0.0
N(507)	0.0		0.0	0.0	0.0	0.0	0.0	0.0	0.0	0.0	0.0	0.0	0.0	0.0	0.0	0.0	0.0	0.0	0.0	0.0	0.0	0.0
F(506)	0.0		0.0	0.0	0.0	0.0	0.0	0.0	0.0	0.0	0.0	0.0	0.0	0.0	0.0	0.0	0.0	0.0	0.0	0.0	0.0	0.0
S(682)	0.0		0.0	0.0	0.0	0.0	0.0	0.0	0.0	0.0	0.0	0.0	0.0	0.0	0.0	0.0	0.0	0.0	0.0	0.0	0.0	0.0
F(480)	0.0		0.0	0.0	0.0	0.0	0.0	0.0	0.0	0.0	0.0	0.0	0.0	0.0	0.0	0.0	0.0	0.0	0.0	0.0	0.0	0.0
Y(479)	0.0		0.0	0.0	0.0	0.0	0.0	0.0	0.0	0.0	0.0	0.0	0.0	0.0	0.0	0.0	0.0	0.0	0.0	0.0	0.0	0.0
G(679)	0.0		0.0	0.0	0.0	0.0	0.0	0.0	0.0	0.0	0.0	0.0	0.0	0.0	0.0	0.0	0.0	0.0	0.0	0.0	0.0	0.0
T(680)	0.0		0.0	0.0	0.0	0.0	0.0	0.0	0.0	0.0	0.0	0.0	0.0	0.0	0.0	0.0	0.0	0.0	0.0	0.0	0.0	0.0
S(681)	0.0		0.0	0.0	0.0	0.0	0.0	0.0	0.0	0.0	0.0	0.0	0.0	0.0	0.0	0.0	0.0	0.0	0.0	0.0	0.0	0.0
E(474)	0.0		0.0	0.0	0.0	0.0	0.0	0.0	0.0	0.0	0.0	0.0	0.0	0.0	0.0	0.0	0.0	0.0	0.0	0.0	0.0	0.0
G(683)	0.0		0.0	0.0	0.0	0.0	0.0	0.0	0.0	0.0	0.0	0.0	0.0	0.0	0.0	0.0	0.0	0.0	0.0	0.0	0.0	0.0
P(505)	0.0		0.0	0.0	0.0	0.0	0.0	0.0	0.0	0.0	0.0	0.0	0.0	0.0	0.0	0.0	0.0	0.0	0.0	0.0	0.0	0.0
F(471)	0.0		0.0	0.0	0.0	0.0	0.0	0.0	0.0	0.0	0.0	0.0	0.0	0.0	0.0	0.0	0.0	0.0	0.0	0.0	0.0	0.0
L(469)	0.0		0.0	0.0	0.0	0.0	0.0	0.0	0.0	0.0	0.0	0.0	0.0	0.0	0.0	0.0	0.0	0.0	0.0	0.0	0.0	0.0
Q(468)	0.0		0.0	0.0	0.0	0.0	0.0	0.0	0.0	0.0	0.0	0.0	0.0	0.0	0.0	0.0	0.0	0.0	0.0	0.0	0.0	0.0
R(467)	0.0		0.0	0.0	0.0	0.0	0.0	0.0	0.0	0.0	0.0	0.0	0.0	0.0	0.0	0.0	0.0	0.0	0.0	0.0	0.0	0.0
L(931)	0.0		0.0	0.0	0.0	0.0	0.0	0.0	0.0	0.0	0.0	0.0	0.0	0.0	0.0	0.0	0.0	0.0	0.0	0.0	0.0	0.0
D(465)	0.0		0.0	0.0	0.0	0.0	0.0	0.0	0.0	0.0	0.0	0.0	0.0	0.0	0.0	0.0	0.0	0.0	0.0	0.0	0.0	0.0
G(678)	0.0		0.0	0.0	0.0	0.0	0.0	0.0	0.0	0.0	0.0	0.0	0.0	0.0	0.0	0.0	0.0	0.0	0.0	0.0	0.0	0.0
Y(483)	0.0		0.0	0.0	0.0	0.0	0.0	0.0	0.0	0.0	0.0	0.0	0.0	0.0	0.0	0.0	0.0	0.0	0.0	0.0	0.0	0.0
P(677)	0.0		0.0	0.0	0.0	0.0	0.0	0.0	0.0	0.0	0.0	0.0	0.0	0.0	0.0	0.0	0.0	0.0	0.0	0.0	0.0	0.0
G(485)	0.0		0.0	0.0	0.0	0.0	0.0	0.0	0.0	0.0	0.0	0.0	0.0	0.0	0.0	0.0	0.0	0.0	0.0	0.0	0.0	0.0
G(486)	0.0		0.0	0.0	0.0	0.0	0.0	0.0	0.0	0.0	0.0	0.0	0.0	0.0	0.0	0.0	0.0	0.0	0.0	0.0	0.0	0.0
C(487)	0.0		0.0	0.0	0.0	0.0	0.0	0.0	0.0	0.0	0.0	0.0	0.0	0.0	0.0	0.0	0.0	0.0	0.0	0.0	0.0	0.0
N(489)	0.0		0.0	0.0	0.0	0.0	0.0	0.0	0.0	0.0	0.0	0.0	0.0	0.0	0.0	0.0	0.0	0.0	0.0	0.0	0.0	0.0
A(490)	0.0		0.0	0.0	0.0	0.0	0.0	0.0	0.0	0.0	0.0	0.0	0.0	0.0	0.0	0.0	0.0	0.0	0.0	0.0	0.0	0.0
K(676)	0.0		0.0	0.0	0.0	0.0	0.0	0.0	0.0	0.0	0.0	0.0	0.0	0.0	0.0	0.0	0.0	0.0	0.0	0.0	0.0	0.0
N(496)	0.0		0.0	0.0	0.0	0.0	0.0	0.0	0.0	0.0	0.0	0.0	0.0	0.0	0.0	0.0	0.0	0.0	0.0	0.0	0.0	0.0
N(497)	0.0		0.0	0.0	0.0	0.0	0.0	0.0	0.0	0.0	0.0	0.0	0.0	0.0	0.0	0.0	0.0	0.0	0.0	0.0	0.0	0.0
L(498)	0.0		0.0	0.0	0.0	0.0	0.0	0.0	0.0	0.0	0.0	0.0	0.0	0.0	0.0	0.0	0.0	0.0	0.0	0.0	0.0	0.0
K(500)	0.0		0.0	0.0	0.0	0.0	0.0	0.0	0.0	0.0	0.0	0.0	0.0	0.0	0.0	0.0	0.0	0.0	0.0	0.0	0.0	0.0
S(501)	0.0		0.0	0.0	0.0	0.0	0.0	0.0	0.0	0.0	0.0	0.0	0.0	0.0	0.0	0.0	0.0	0.0	0.0	0.0	0.0	0.0
A(502)	0.0		0.0	0.0	0.0	0.0	0.0	0.0	0.0	0.0	0.0	0.0	0.0	0.0	0.0	0.0	0.0	0.0	0.0	0.0	0.0	0.0
G(503)	0.0		0.0	0.0	0.0	0.0	0.0	0.0	0.0	0.0	0.0	0.0	0.0	0.0	0.0	0.0	0.0	0.0	0.0	0.0	0.0	0.0
F(504)	0.0		0.0	0.0	0.0	0.0	0.0	0.0	0.0	0.0	0.0	0.0	0.0	0.0	0.0	0.0	0.0	0.0	0.0	0.0	0.0	0.0
A(547)	0.0		0.0	0.0	0.0	0.0	0.0	0.0	0.0	0.0	0.0	0.0	0.0	0.0	0.0	0.0	0.0	0.0	0.0	0.0	0.0	0.0
V(662)	0.0		0.0	0.0	0.0	0.0	0.0	0.0	0.0	0.0	0.0	0.0	0.0	0.0	0.0	0.0	0.0	0.0	0.0	0.0	0.0	0.0
K(551)	0.0		0.0	0.0	0.0	0.0	0.0	0.0	0.0	0.0	0.0	0.0	0.0	0.0	0.0	0.0	0.0	0.0	0.0	0.0	0.0	0.0
K(603)	0.0		0.0	0.0	0.0	0.0	0.0	0.0	0.0	0.0	0.0	0.0	0.0	0.0	0.0	0.0	0.0	0.0	0.0	0.0	0.0	0.0
N(611)	0.0		0.0	0.0	0.0	0.0	0.0	0.0	0.0	0.0	0.0	0.0	0.0	0.0	0.0	0.0	0.0	0.0	0.0	0.0	0.0	0.0
D(608)	0.0		0.0	0.0	0.0	0.0	0.0	0.0	0.0	0.0	0.0	0.0	0.0	0.0	0.0	0.0	0.0	0.0	0.0	0.0	0.0	0.0
C(645)	0.0		0.0	0.0	0.0	0.0	0.0	0.0	0.0	0.0	0.0	0.0	0.0	0.0	0.0	0.0	0.0	0.0	0.0	0.0	0.0	0.0
Y(606)	0.0		0.0	0.0	0.0	0.0	0.0	0.0	0.0	0.0	0.0	0.0	0.0	0.0	0.0	0.0	0.0	0.0	0.0	0.0	0.0	0.0
V(605)	0.0		0.0	0.0	0.0	0.0	0.0	0.0	0.0	0.0	0.0	0.0	0.0	0.0	0.0	0.0	0.0	0.0	0.0	0.0	0.0	0.0
C(646)	0.0		0.0	0.0	0.0	0.0	0.0	0.0	0.0	0.0	0.0	0.0	0.0	0.0	0.0	0.0	0.0	0.0	0.0	0.0	0.0	0.0
L(602)	0.0		0.0	0.0	0.0	0.0	0.0	0.0	0.0	0.0	0.0	0.0	0.0	0.0	0.0	0.0	0.0	0.0	0.0	0.0	0.0	0.0
K(593)	0.0		0.0	0.0	0.0	0.0	0.0	0.0	0.0	0.0	0.0	0.0	0.0	0.0	0.0	0.0	0.0	0.0	0.0	0.0	0.0	0.0
N(600)	0.0		0.0	0.0	0.0	0.0	0.0	0.0	0.0	0.0	0.0	0.0	0.0	0.0	0.0	0.0	0.0	0.0	0.0	0.0	0.0	0.0
H(599)	0.0		0.0	0.0	0.0	0.0	0.0	0.0	0.0	0.0	0.0	0.0	0.0	0.0	0.0	0.0	0.0	0.0	0.0	0.0	0.0	0.0
W(598)	0.0		0.0	0.0	0.0	0.0	0.0	0.0	0.0	0.0	0.0	0.0	0.0	0.0	0.0	0.0	0.0	0.0	0.0	0.0	0.0	0.0
G(597)	0.0		0.0	0.0	0.0	0.0	0.0	0.0	0.0	0.0	0.0	0.0	0.0	0.0	0.0	0.0	0.0	0.0	0.0	0.0	0.0	0.0
H(650)	0.0		0.0	0.0	0.0	0.0	0.0	0.0	0.0	0.0	0.0	0.0	0.0	0.0	0.0	0.0	0.0	0.0	0.0	0.0	0.0	0.0
Y(595)	0.0		0.0	0.0	0.0	0.0	0.0	0.0	0.0	0.0	0.0	0.0	0.0	0.0	0.0	0.0	0.0	0.0	0.0	0.0	0.0	0.0
H(642)	0.0		0.0	0.0	0.0	0.0	0.0	0.0	0.0	0.0	0.0	0.0	0.0	0.0	0.0	0.0	0.0	0.0	0.0	0.0	0.0	0.0
K(641)	0.0		0.0	0.0	0.0	0.0	0.0	0.0	0.0	0.0	0.0	0.0	0.0	0.0	0.0	0.0	0.0	0.0	0.0	0.0	0.0	0.0
G(616)	0.0		0.0	0.0	0.0	0.0	0.0	0.0	0.0	0.0	0.0	0.0	0.0	0.0	0.0	0.0	0.0	0.0	0.0	0.0	0.0	0.0
W(617)	0.0		0.0	0.0	0.0	0.0	0.0	0.0	0.0	0.0	0.0	0.0	0.0	0.0	0.0	0.0	0.0	0.0	0.0	0.0	0.0	0.0
D(618)	0.0		0.0	0.0	0.0	0.0	0.0	0.0	0.0	0.0	0.0	0.0	0.0	0.0	0.0	0.0	0.0	0.0	0.0	0.0	0.0	0.0
Y(619)	0.0		0.0	0.0	0.0	0.0	0.0	0.0	0.0	0.0	0.0	0.0	0.0	0.0	0.0	0.0	0.0	0.0	0.0	0.0	0.0	0.0
P(620)	0.0		0.0	0.0	0.0	0.0	0.0	0.0	0.0	0.0	0.0	0.0	0.0	0.0	0.0	0.0	0.0	0.0	0.0	0.0	0.0	0.0
K(621)	0.0		0.0	0.0	0.0	0.0	0.0	0.0	0.0	0.0	0.0	0.0	0.0	0.0	0.0	0.0	0.0	0.0	0.0	0.0	0.0	0.0
C(622)	0.0		0.0	0.0	0.0	0.0	0.0	0.0	0.0	0.0	0.0	0.0	0.0	0.0	0.0	0.0	0.0	0.0	0.0	0.0	0.0	0.0
D(623)	0.0		0.0	0.0	0.0	0.0	0.0	0.0	0.0	0.0	0.0	0.0	0.0	0.0	0.0	0.0	0.0	0.0	0.0	0.0	0.0	0.0
R(624)	0.0		0.0	0.0	0.0	0.0	0.0	0.0	0.0	0.0	0.0	0.0	0.0	0.0	0.0	0.0	0.0	0.0	0.0	0.0	0.0	0.0
R(640)	0.0		0.0	0.0	0.0	0.0	0.0	0.0	0.0	0.0	0.0	0.0	0.0	0.0	0.0	0.0	0.0	0.0	0.0	0.0	0.0	0.0
M(626)	0.0		0.0	0.0	0.0	0.0	0.0	0.0	0.0	0.0	0.0	0.0	0.0	0.0	0.0	0.0	0.0	0.0	0.0	0.0	0.0	0.0
N(628)	0.0		0.0	0.0	0.0	0.0	0.0	0.0	0.0	0.0	0.0	0.0	0.0	0.0	0.0	0.0	0.0	0.0	0.0	0.0	0.0	0.0
A(639)	0.0		0.0	0.0	0.0	0.0	0.0	0.0	0.0	0.0	0.0	0.0	0.0	0.0	0.0	0.0	0.0	0.0	0.0	0.0	0.0	0.0
V(637)	0.0		0.0	0.0	0.0	0.0	0.0	0.0	0.0	0.0	0.0	0.0	0.0	0.0	0.0	0.0	0.0	0.0	0.0	0.0	0.0	0.0
R(631)	0.0		0.0	0.0	0.0	0.0	0.0	0.0	0.0	0.0	0.0	0.0	0.0	0.0	0.0	0.0	0.0	0.0	0.0	0.0	0.0	0.0
F(594)	0.0		0.0	0.0	0.0	0.0	0.0	0.0	0.0	0.0	0.0	0.0	0.0	0.0	0.0	0.0	0.0	0.0	0.0	0.0	0.0	0.0
G(590)	0.0		0.0	0.0	0.0	0.0	0.0	0.0	0.0	0.0	0.0	0.0	0.0	0.0	0.0	0.0	0.0	0.0	0.0	0.0	0.0	0.0
N(552)	0.0		0.0	0.0	0.0	0.0	0.0	0.0	0.0	0.0	0.0	0.0	0.0	0.0	0.0	0.0	0.0	0.0	0.0	0.0	0.0	0.0
V(560)	0.0		0.0	0.0	0.0	0.0	0.0	0.0	0.0	0.0	0.0	0.0	0.0	0.0	0.0	0.0	0.0	0.0	0.0	0.0	0.0	0.0
N(568)	0.0		0.0	0.0	0.0	0.0	0.0	0.0	0.0	0.0	0.0	0.0	0.0	0.0	0.0	0.0	0.0	0.0	0.0	0.0	0.0	0.0
C(659)	0.0		0.0	0.0	0.0	0.0	0.0	0.0	0.0	0.0	0.0	0.0	0.0	0.0	0.0	0.0	0.0	0.0	0.0	0.0	0.0	0.0
T(565)	0.0		0.0	0.0	0.0	0.0	0.0	0.0	0.0	0.0	0.0	0.0	0.0	0.0	0.0	0.0	0.0	0.0	0.0	0.0	0.0	0.0
C(563)	0.0		0.0	0.0	0.0	0.0	0.0	0.0	0.0	0.0	0.0	0.0	0.0	0.0	0.0	0.0	0.0	0.0	0.0	0.0	0.0	0.0
I(562)	0.0		0.0	0.0	0.0	0.0	0.0	0.0	0.0	0.0	0.0	0.0	0.0	0.0	0.0	0.0	0.0	0.0	0.0	0.0	0.0	0.0
S(561)	0.0		0.0	0.0	0.0	0.0	0.0	0.0	0.0	0.0	0.0	0.0	0.0	0.0	0.0	0.0	0.0	0.0	0.0	0.0	0.0	0.0
G(559)	0.0		0.0	0.0	0.0	0.0	0.0	0.0	0.0	0.0	0.0	0.0	0.0	0.0	0.0	0.0	0.0	0.0	0.0	0.0	0.0	0.0
I(589)	0.0		0.0	0.0	0.0	0.0	0.0	0.0	0.0	0.0	0.0	0.0	0.0	0.0	0.0	0.0	0.0	0.0	0.0	0.0	0.0	0.0
A(558)	0.0		0.0	0.0	0.0	0.0	0.0	0.0	0.0	0.0	0.0	0.0	0.0	0.0	0.0	0.0	0.0	0.0	0.0	0.0	0.0	0.0
V(557)	0.0		0.0	0.0	0.0	0.0	0.0	0.0	0.0	0.0	0.0	0.0	0.0	0.0	0.0	0.0	0.0	0.0	0.0	0.0	0.0	0.0
T(556)	0.0		0.0	0.0	0.0	0.0	0.0	0.0	0.0	0.0	0.0	0.0	0.0	0.0	0.0	0.0	0.0	0.0	0.0	0.0	0.0	0.0
R(555)	0.0		0.0	0.0	0.0	0.0	0.0	0.0	0.0	0.0	0.0	0.0	0.0	0.0	0.0	0.0	0.0	0.0	0.0	0.0	0.0	0.0
Q(661)	0.0		0.0	0.0	0.0	0.0	0.0	0.0	0.0	0.0	0.0	0.0	0.0	0.0	0.0	0.0	0.0	0.0	0.0	0.0	0.0	0.0
R(553)	0.0		0.0	0.0	0.0	0.0	0.0	0.0	0.0	0.0	0.0	0.0	0.0	0.0	0.0	0.0	0.0	0.0	0.0	0.0	0.0	0.0
R(569)	0.0		0.0	0.0	0.0	0.0	0.0	0.0	0.0	0.0	0.0	0.0	0.0	0.0	0.0	0.0	0.0	0.0	0.0	0.0	0.0	0.0
Q(570)	0.0		0.0	0.0	0.0	0.0	0.0	0.0	0.0	0.0	0.0	0.0	0.0	0.0	0.0	0.0	0.0	0.0	0.0	0.0	0.0	0.0
F(571)	0.0		0.0	0.0	0.0	0.0	0.0	0.0	0.0	0.0	0.0	0.0	0.0	0.0	0.0	0.0	0.0	0.0	0.0	0.0	0.0	0.0
H(572)	0.0		0.0	0.0	0.0	0.0	0.0	0.0	0.0	0.0	0.0	0.0	0.0	0.0	0.0	0.0	0.0	0.0	0.0	0.0	0.0	0.0
Q(573)	0.0		0.0	0.0	0.0	0.0	0.0	0.0	0.0	0.0	0.0	0.0	0.0	0.0	0.0	0.0	0.0	0.0	0.0	0.0	0.0	0.0
K(574)	0.0		0.0	0.0	0.0	0.0	0.0	0.0	0.0	0.0	0.0	0.0	0.0	0.0	0.0	0.0	0.0	0.0	0.0	0.0	0.0	0.0
L(575)	0.0		0.0	0.0	0.0	0.0	0.0	0.0	0.0	0.0	0.0	0.0	0.0	0.0	0.0	0.0	0.0	0.0	0.0	0.0	0.0	0.0
L(576)	0.0		0.0	0.0	0.0	0.0	0.0	0.0	0.0	0.0	0.0	0.0	0.0	0.0	0.0	0.0	0.0	0.0	0.0	0.0	0.0	0.0
S(578)	0.0		0.0	0.0	0.0	0.0	0.0	0.0	0.0	0.0	0.0	0.0	0.0	0.0	0.0	0.0	0.0	0.0	0.0	0.0	0.0	0.0
A(580)	0.0		0.0	0.0	0.0	0.0	0.0	0.0	0.0	0.0	0.0	0.0	0.0	0.0	0.0	0.0	0.0	0.0	0.0	0.0	0.0	0.0
E(658)	0.0		0.0	0.0	0.0	0.0	0.0	0.0	0.0	0.0	0.0	0.0	0.0	0.0	0.0	0.0	0.0	0.0	0.0	0.0	0.0	0.0
N(657)	0.0		0.0	0.0	0.0	0.0	0.0	0.0	0.0	0.0	0.0	0.0	0.0	0.0	0.0	0.0	0.0	0.0	0.0	0.0	0.0	0.0
G(584)	0.0		0.0	0.0	0.0	0.0	0.0	0.0	0.0	0.0	0.0	0.0	0.0	0.0	0.0	0.0	0.0	0.0	0.0	0.0	0.0	0.0
L(655)	0.0		0.0	0.0	0.0	0.0	0.0	0.0	0.0	0.0	0.0	0.0	0.0	0.0	0.0	0.0	0.0	0.0	0.0	0.0	0.0	0.0
R(654)	0.0		0.0	0.0	0.0	0.0	0.0	0.0	0.0	0.0	0.0	0.0	0.0	0.0	0.0	0.0	0.0	0.0	0.0	0.0	0.0	0.0
Y(653)	0.0		0.0	0.0	0.0	0.0	0.0	0.0	0.0	0.0	0.0	0.0	0.0	0.0	0.0	0.0	0.0	0.0	0.0	0.0	0.0	0.0
F(652)	0.0		0.0	0.0	0.0	0.0	0.0	0.0	0.0	0.0	0.0	0.0	0.0	0.0	0.0	0.0	0.0	0.0	0.0	0.0	0.0	0.0
D(684)	0.0		0.0	0.0	0.0	0.0	0.0	0.0	0.0	0.0	0.0	0.0	0.0	0.0	0.0	0.0	0.0	0.0	0.0	0.0	0.0	0.0
T(462)	0.0		0.0	0.0	0.0	0.0	0.0	0.0	0.0	0.0	0.0	0.0	0.0	0.0	0.0	0.0	0.0	0.0	0.0	0.0	0.0	0.0
L(460)	0.0		0.0	0.0	0.0	0.0	0.0	0.0	0.0	0.0	0.0	0.0	0.0	0.0	0.0	0.0	0.0	0.0	0.0	0.0	0.0	0.0
V(338)	0.0		0.0	0.0	0.0	0.0	0.0	0.0	0.0	0.0	0.0	0.0	0.0	0.0	0.0	0.0	0.0	0.0	0.0	0.0	0.0	0.0
C(730)	0.0		0.0	0.0	0.0	0.0	0.0	0.0	0.0	0.0	0.0	0.0	0.0	0.0	0.0	0.0	0.0	0.0	0.0	0.0	0.0	0.0
H(347)	0.0		0.0	0.0	0.0	0.0	0.0	0.0	0.0	0.0	0.0	0.0	0.0	0.0	0.0	0.0	0.0	0.0	0.0	0.0	0.0	0.0
L(731)	0.0		0.0	0.0	0.0	0.0	0.0	0.0	0.0	0.0	0.0	0.0	0.0	0.0	0.0	0.0	0.0	0.0	0.0	0.0	0.0	0.0
Y(732)	0.0		0.0	0.0	0.0	0.0	0.0	0.0	0.0	0.0	0.0	0.0	0.0	0.0	0.0	0.0	0.0	0.0	0.0	0.0	0.0	0.0
R(733)	0.0		0.0	0.0	0.0	0.0	0.0	0.0	0.0	0.0	0.0	0.0	0.0	0.0	0.0	0.0	0.0	0.0	0.0	0.0	0.0	0.0
R(735)	0.0		0.0	0.0	0.0	0.0	0.0	0.0	0.0	0.0	0.0	0.0	0.0	0.0	0.0	0.0	0.0	0.0	0.0	0.0	0.0	0.0
G(337)	0.0		0.0	0.0	0.0	0.0	0.0	0.0	0.0	0.0	0.0	0.0	0.0	0.0	0.0	0.0	0.0	0.0	0.0	0.0	0.0	0.0
F(321)	0.0		0.0	0.0	0.0	0.0	0.0	0.0	0.0	0.0	0.0	0.0	0.0	0.0	0.0	0.0	0.0	0.0	0.0	0.0	0.0	0.0
F(741)	0.0		0.0	0.0	0.0	0.0	0.0	0.0	0.0	0.0	0.0	0.0	0.0	0.0	0.0	0.0	0.0	0.0	0.0	0.0	0.0	0.0
K(332)	0.0		0.0	0.0	0.0	0.0	0.0	0.0	0.0	0.0	0.0	0.0	0.0	0.0	0.0	0.0	0.0	0.0	0.0	0.0	0.0	0.0
P(328)	0.0		0.0	0.0	0.0	0.0	0.0	0.0	0.0	0.0	0.0	0.0	0.0	0.0	0.0	0.0	0.0	0.0	0.0	0.0	0.0	0.0
G(327)	0.0		0.0	0.0	0.0	0.0	0.0	0.0	0.0	0.0	0.0	0.0	0.0	0.0	0.0	0.0	0.0	0.0	0.0	0.0	0.0	0.0
T(324)	0.0		0.0	0.0	0.0	0.0	0.0	0.0	0.0	0.0	0.0	0.0	0.0	0.0	0.0	0.0	0.0	0.0	0.0	0.0	0.0	0.0
Y(748)	0.0		0.0	0.0	0.0	0.0	0.0	0.0	0.0	0.0	0.0	0.0	0.0	0.0	0.0	0.0	0.0	0.0	0.0	0.0	0.0	0.0
L(351)	0.0		0.0	0.0	0.0	0.0	0.0	0.0	0.0	0.0	0.0	0.0	0.0	0.0	0.0	0.0	0.0	0.0	0.0	0.0	0.0	0.0
G(352)	0.0		0.0	0.0	0.0	0.0	0.0	0.0	0.0	0.0	0.0	0.0	0.0	0.0	0.0	0.0	0.0	0.0	0.0	0.0	0.0	0.0
Y(728)	0.0		0.0	0.0	0.0	0.0	0.0	0.0	0.0	0.0	0.0	0.0	0.0	0.0	0.0	0.0	0.0	0.0	0.0	0.0	0.0	0.0
L(727)	0.0		0.0	0.0	0.0	0.0	0.0	0.0	0.0	0.0	0.0	0.0	0.0	0.0	0.0	0.0	0.0	0.0	0.0	0.0	0.0	0.0
N(356)	0.0		0.0	0.0	0.0	0.0	0.0	0.0	0.0	0.0	0.0	0.0	0.0	0.0	0.0	0.0	0.0	0.0	0.0	0.0	0.0	0.0
Q(724)	0.0		0.0	0.0	0.0	0.0	0.0	0.0	0.0	0.0	0.0	0.0	0.0	0.0	0.0	0.0	0.0	0.0	0.0	0.0	0.0	0.0
D(358)	0.0		0.0	0.0	0.0	0.0	0.0	0.0	0.0	0.0	0.0	0.0	0.0	0.0	0.0	0.0	0.0	0.0	0.0	0.0	0.0	0.0
V(359)	0.0		0.0	0.0	0.0	0.0	0.0	0.0	0.0	0.0	0.0	0.0	0.0	0.0	0.0	0.0	0.0	0.0	0.0	0.0	0.0	0.0
N(360)	0.0		0.0	0.0	0.0	0.0	0.0	0.0	0.0	0.0	0.0	0.0	0.0	0.0	0.0	0.0	0.0	0.0	0.0	0.0	0.0	0.0
L(361)	0.0		0.0	0.0	0.0	0.0	0.0	0.0	0.0	0.0	0.0	0.0	0.0	0.0	0.0	0.0	0.0	0.0	0.0	0.0	0.0	0.0
S(363)	0.0		0.0	0.0	0.0	0.0	0.0	0.0	0.0	0.0	0.0	0.0	0.0	0.0	0.0	0.0	0.0	0.0	0.0	0.0	0.0	0.0
R(365)	0.0		0.0	0.0	0.0	0.0	0.0	0.0	0.0	0.0	0.0	0.0	0.0	0.0	0.0	0.0	0.0	0.0	0.0	0.0	0.0	0.0
L(366)	0.0		0.0	0.0	0.0	0.0	0.0	0.0	0.0	0.0	0.0	0.0	0.0	0.0	0.0	0.0	0.0	0.0	0.0	0.0	0.0	0.0
S(367)	0.0		0.0	0.0	0.0	0.0	0.0	0.0	0.0	0.0	0.0	0.0	0.0	0.0	0.0	0.0	0.0	0.0	0.0	0.0	0.0	0.0
F(368)	0.0		0.0	0.0	0.0	0.0	0.0	0.0	0.0	0.0	0.0	0.0	0.0	0.0	0.0	0.0	0.0	0.0	0.0	0.0	0.0	0.0
E(370)	0.0		0.0	0.0	0.0	0.0	0.0	0.0	0.0	0.0	0.0	0.0	0.0	0.0	0.0	0.0	0.0	0.0	0.0	0.0	0.0	0.0
L(371)	0.0		0.0	0.0	0.0	0.0	0.0	0.0	0.0	0.0	0.0	0.0	0.0	0.0	0.0	0.0	0.0	0.0	0.0	0.0	0.0	0.0
P(322)	0.0		0.0	0.0	0.0	0.0	0.0	0.0	0.0	0.0	0.0	0.0	0.0	0.0	0.0	0.0	0.0	0.0	0.0	0.0	0.0	0.0
L(749)	0.0		0.0	0.0	0.0	0.0	0.0	0.0	0.0	0.0	0.0	0.0	0.0	0.0	0.0	0.0	0.0	0.0	0.0	0.0	0.0	0.0
V(373)	0.0		0.0	0.0	0.0	0.0	0.0	0.0	0.0	0.0	0.0	0.0	0.0	0.0	0.0	0.0	0.0	0.0	0.0	0.0	0.0	0.0
D(760)	0.0		0.0	0.0	0.0	0.0	0.0	0.0	0.0	0.0	0.0	0.0	0.0	0.0	0.0	0.0	0.0	0.0	0.0	0.0	0.0	0.0
L(758)	0.0		0.0	0.0	0.0	0.0	0.0	0.0	0.0	0.0	0.0	0.0	0.0	0.0	0.0	0.0	0.0	0.0	0.0	0.0	0.0	0.0
C(298)	0.0		0.0	0.0	0.0	0.0	0.0	0.0	0.0	0.0	0.0	0.0	0.0	0.0	0.0	0.0	0.0	0.0	0.0	0.0	0.0	0.0
N(297)	0.0		0.0	0.0	0.0	0.0	0.0	0.0	0.0	0.0	0.0	0.0	0.0	0.0	0.0	0.0	0.0	0.0	0.0	0.0	0.0	0.0
P(296)	0.0		0.0	0.0	0.0	0.0	0.0	0.0	0.0	0.0	0.0	0.0	0.0	0.0	0.0	0.0	0.0	0.0	0.0	0.0	0.0	0.0
S(759)	0.0		0.0	0.0	0.0	0.0	0.0	0.0	0.0	0.0	0.0	0.0	0.0	0.0	0.0	0.0	0.0	0.0	0.0	0.0	0.0	0.0
Y(294)	0.0		0.0	0.0	0.0	0.0	0.0	0.0	0.0	0.0	0.0	0.0	0.0	0.0	0.0	0.0	0.0	0.0	0.0	0.0	0.0	0.0
W(290)	0.0		0.0	0.0	0.0	0.0	0.0	0.0	0.0	0.0	0.0	0.0	0.0	0.0	0.0	0.0	0.0	0.0	0.0	0.0	0.0	0.0
K(751)	0.0		0.0	0.0	0.0	0.0	0.0	0.0	0.0	0.0	0.0	0.0	0.0	0.0	0.0	0.0	0.0	0.0	0.0	0.0	0.0	0.0
D(761)	0.0		0.0	0.0	0.0	0.0	0.0	0.0	0.0	0.0	0.0	0.0	0.0	0.0	0.0	0.0	0.0	0.0	0.0	0.0	0.0	0.0
K(288)	0.0		0.0	0.0	0.0	0.0	0.0	0.0	0.0	0.0	0.0	0.0	0.0	0.0	0.0	0.0	0.0	0.0	0.0	0.0	0.0	0.0
F(287)	0.0		0.0	0.0	0.0	0.0	0.0	0.0	0.0	0.0	0.0	0.0	0.0	0.0	0.0	0.0	0.0	0.0	0.0	0.0	0.0	0.0
Y(286)	0.0		0.0	0.0	0.0	0.0	0.0	0.0	0.0	0.0	0.0	0.0	0.0	0.0	0.0	0.0	0.0	0.0	0.0	0.0	0.0	0.0
A(762)	0.0		0.0	0.0	0.0	0.0	0.0	0.0	0.0	0.0	0.0	0.0	0.0	0.0	0.0	0.0	0.0	0.0	0.0	0.0	0.0	0.0
V(763)	0.0		0.0	0.0	0.0	0.0	0.0	0.0	0.0	0.0	0.0	0.0	0.0	0.0	0.0	0.0	0.0	0.0	0.0	0.0	0.0	0.0
N(300)	0.0		0.0	0.0	0.0	0.0	0.0	0.0	0.0	0.0	0.0	0.0	0.0	0.0	0.0	0.0	0.0	0.0	0.0	0.0	0.0	0.0
C(301)	0.0		0.0	0.0	0.0	0.0	0.0	0.0	0.0	0.0	0.0	0.0	0.0	0.0	0.0	0.0	0.0	0.0	0.0	0.0	0.0	0.0
I(757)	0.0		0.0	0.0	0.0	0.0	0.0	0.0	0.0	0.0	0.0	0.0	0.0	0.0	0.0	0.0	0.0	0.0	0.0	0.0	0.0	0.0
M(755)	0.0		0.0	0.0	0.0	0.0	0.0	0.0	0.0	0.0	0.0	0.0	0.0	0.0	0.0	0.0	0.0	0.0	0.0	0.0	0.0	0.0
R(305)	0.0		0.0	0.0	0.0	0.0	0.0	0.0	0.0	0.0	0.0	0.0	0.0	0.0	0.0	0.0	0.0	0.0	0.0	0.0	0.0	0.0
C(306)	0.0		0.0	0.0	0.0	0.0	0.0	0.0	0.0	0.0	0.0	0.0	0.0	0.0	0.0	0.0	0.0	0.0	0.0	0.0	0.0	0.0
S(754)	0.0		0.0	0.0	0.0	0.0	0.0	0.0	0.0	0.0	0.0	0.0	0.0	0.0	0.0	0.0	0.0	0.0	0.0	0.0	0.0	0.0
L(308)	0.0		0.0	0.0	0.0	0.0	0.0	0.0	0.0	0.0	0.0	0.0	0.0	0.0	0.0	0.0	0.0	0.0	0.0	0.0	0.0	0.0
H(309)	0.0		0.0	0.0	0.0	0.0	0.0	0.0	0.0	0.0	0.0	0.0	0.0	0.0	0.0	0.0	0.0	0.0	0.0	0.0	0.0	0.0
C(310)	0.0		0.0	0.0	0.0	0.0	0.0	0.0	0.0	0.0	0.0	0.0	0.0	0.0	0.0	0.0	0.0	0.0	0.0	0.0	0.0	0.0
F(753)	0.0		0.0	0.0	0.0	0.0	0.0	0.0	0.0	0.0	0.0	0.0	0.0	0.0	0.0	0.0	0.0	0.0	0.0	0.0	0.0	0.0
N(312)	0.0		0.0	0.0	0.0	0.0	0.0	0.0	0.0	0.0	0.0	0.0	0.0	0.0	0.0	0.0	0.0	0.0	0.0	0.0	0.0	0.0
F(313)	0.0		0.0	0.0	0.0	0.0	0.0	0.0	0.0	0.0	0.0	0.0	0.0	0.0	0.0	0.0	0.0	0.0	0.0	0.0	0.0	0.0
N(314)	0.0		0.0	0.0	0.0	0.0	0.0	0.0	0.0	0.0	0.0	0.0	0.0	0.0	0.0	0.0	0.0	0.0	0.0	0.0	0.0	0.0
H(752)	0.0		0.0	0.0	0.0	0.0	0.0	0.0	0.0	0.0	0.0	0.0	0.0	0.0	0.0	0.0	0.0	0.0	0.0	0.0	0.0	0.0
L(316)	0.0		0.0	0.0	0.0	0.0	0.0	0.0	0.0	0.0	0.0	0.0	0.0	0.0	0.0	0.0	0.0	0.0	0.0	0.0	0.0	0.0
S(635)	0.0		0.0	0.0	0.0	0.0	0.0	0.0	0.0	0.0	0.0	0.0	0.0	0.0	0.0	0.0	0.0	0.0	0.0	0.0	0.0	0.0
L(372)	0.0		0.0	0.0	0.0	0.0	0.0	0.0	0.0	0.0	0.0	0.0	0.0	0.0	0.0	0.0	0.0	0.0	0.0	0.0	0.0	0.0
Y(374)	0.0		0.0	0.0	0.0	0.0	0.0	0.0	0.0	0.0	0.0	0.0	0.0	0.0	0.0	0.0	0.0	0.0	0.0	0.0	0.0	0.0
N(459)	0.0		0.0	0.0	0.0	0.0	0.0	0.0	0.0	0.0	0.0	0.0	0.0	0.0	0.0	0.0	0.0	0.0	0.0	0.0	0.0	0.0
E(431)	0.0		0.0	0.0	0.0	0.0	0.0	0.0	0.0	0.0	0.0	0.0	0.0	0.0	0.0	0.0	0.0	0.0	0.0	0.0	0.0	0.0
N(691)	0.0		0.0	0.0	0.0	0.0	0.0	0.0	0.0	0.0	0.0	0.0	0.0	0.0	0.0	0.0	0.0	0.0	0.0	0.0	0.0	0.0
K(438)	0.0		0.0	0.0	0.0	0.0	0.0	0.0	0.0	0.0	0.0	0.0	0.0	0.0	0.0	0.0	0.0	0.0	0.0	0.0	0.0	0.0
L(437)	0.0		0.0	0.0	0.0	0.0	0.0	0.0	0.0	0.0	0.0	0.0	0.0	0.0	0.0	0.0	0.0	0.0	0.0	0.0	0.0	0.0
S(692)	0.0		0.0	0.0	0.0	0.0	0.0	0.0	0.0	0.0	0.0	0.0	0.0	0.0	0.0	0.0	0.0	0.0	0.0	0.0	0.0	0.0
S(433)	0.0		0.0	0.0	0.0	0.0	0.0	0.0	0.0	0.0	0.0	0.0	0.0	0.0	0.0	0.0	0.0	0.0	0.0	0.0	0.0	0.0
G(432)	0.0		0.0	0.0	0.0	0.0	0.0	0.0	0.0	0.0	0.0	0.0	0.0	0.0	0.0	0.0	0.0	0.0	0.0	0.0	0.0	0.0
F(429)	0.0		0.0	0.0	0.0	0.0	0.0	0.0	0.0	0.0	0.0	0.0	0.0	0.0	0.0	0.0	0.0	0.0	0.0	0.0	0.0	0.0
T(701)	0.0		0.0	0.0	0.0	0.0	0.0	0.0	0.0	0.0	0.0	0.0	0.0	0.0	0.0	0.0	0.0	0.0	0.0	0.0	0.0	0.0
F(428)	0.0		0.0	0.0	0.0	0.0	0.0	0.0	0.0	0.0	0.0	0.0	0.0	0.0	0.0	0.0	0.0	0.0	0.0	0.0	0.0	0.0
G(427)	0.0		0.0	0.0	0.0	0.0	0.0	0.0	0.0	0.0	0.0	0.0	0.0	0.0	0.0	0.0	0.0	0.0	0.0	0.0	0.0	0.0
K(426)	0.0		0.0	0.0	0.0	0.0	0.0	0.0	0.0	0.0	0.0	0.0	0.0	0.0	0.0	0.0	0.0	0.0	0.0	0.0	0.0	0.0
F(694)	0.0		0.0	0.0	0.0	0.0	0.0	0.0	0.0	0.0	0.0	0.0	0.0	0.0	0.0	0.0	0.0	0.0	0.0	0.0	0.0	0.0
N(695)	0.0		0.0	0.0	0.0	0.0	0.0	0.0	0.0	0.0	0.0	0.0	0.0	0.0	0.0	0.0	0.0	0.0	0.0	0.0	0.0	0.0
C(697)	0.0		0.0	0.0	0.0	0.0	0.0	0.0	0.0	0.0	0.0	0.0	0.0	0.0	0.0	0.0	0.0	0.0	0.0	0.0	0.0	0.0
F(440)	0.0		0.0	0.0	0.0	0.0	0.0	0.0	0.0	0.0	0.0	0.0	0.0	0.0	0.0	0.0	0.0	0.0	0.0	0.0	0.0	0.0
F(441)	0.0		0.0	0.0	0.0	0.0	0.0	0.0	0.0	0.0	0.0	0.0	0.0	0.0	0.0	0.0	0.0	0.0	0.0	0.0	0.0	0.0
F(442)	0.0		0.0	0.0	0.0	0.0	0.0	0.0	0.0	0.0	0.0	0.0	0.0	0.0	0.0	0.0	0.0	0.0	0.0	0.0	0.0	0.0
A(690)	0.0		0.0	0.0	0.0	0.0	0.0	0.0	0.0	0.0	0.0	0.0	0.0	0.0	0.0	0.0	0.0	0.0	0.0	0.0	0.0	0.0
Y(689)	0.0		0.0	0.0	0.0	0.0	0.0	0.0	0.0	0.0	0.0	0.0	0.0	0.0	0.0	0.0	0.0	0.0	0.0	0.0	0.0	0.0
G(446)	0.0		0.0	0.0	0.0	0.0	0.0	0.0	0.0	0.0	0.0	0.0	0.0	0.0	0.0	0.0	0.0	0.0	0.0	0.0	0.0	0.0
N(447)	0.0		0.0	0.0	0.0	0.0	0.0	0.0	0.0	0.0	0.0	0.0	0.0	0.0	0.0	0.0	0.0	0.0	0.0	0.0	0.0	0.0
A(448)	0.0		0.0	0.0	0.0	0.0	0.0	0.0	0.0	0.0	0.0	0.0	0.0	0.0	0.0	0.0	0.0	0.0	0.0	0.0	0.0	0.0
A(688)	0.0		0.0	0.0	0.0	0.0	0.0	0.0	0.0	0.0	0.0	0.0	0.0	0.0	0.0	0.0	0.0	0.0	0.0	0.0	0.0	0.0
T(687)	0.0		0.0	0.0	0.0	0.0	0.0	0.0	0.0	0.0	0.0	0.0	0.0	0.0	0.0	0.0	0.0	0.0	0.0	0.0	0.0	0.0
D(452)	0.0		0.0	0.0	0.0	0.0	0.0	0.0	0.0	0.0	0.0	0.0	0.0	0.0	0.0	0.0	0.0	0.0	0.0	0.0	0.0	0.0
Y(453)	0.0		0.0	0.0	0.0	0.0	0.0	0.0	0.0	0.0	0.0	0.0	0.0	0.0	0.0	0.0	0.0	0.0	0.0	0.0	0.0	0.0
D(454)	0.0		0.0	0.0	0.0	0.0	0.0	0.0	0.0	0.0	0.0	0.0	0.0	0.0	0.0	0.0	0.0	0.0	0.0	0.0	0.0	0.0
Y(455)	0.0		0.0	0.0	0.0	0.0	0.0	0.0	0.0	0.0	0.0	0.0	0.0	0.0	0.0	0.0	0.0	0.0	0.0	0.0	0.0	0.0
Y(456)	0.0		0.0	0.0	0.0	0.0	0.0	0.0	0.0	0.0	0.0	0.0	0.0	0.0	0.0	0.0	0.0	0.0	0.0	0.0	0.0	0.0
T(686)	0.0		0.0	0.0	0.0	0.0	0.0	0.0	0.0	0.0	0.0	0.0	0.0	0.0	0.0	0.0	0.0	0.0	0.0	0.0	0.0	0.0
Y(458)	0.0		0.0	0.0	0.0	0.0	0.0	0.0	0.0	0.0	0.0	0.0	0.0	0.0	0.0	0.0	0.0	0.0	0.0	0.0	0.0	0.0
Q(698)	0.0		0.0	0.0	0.0	0.0	0.0	0.0	0.0	0.0	0.0	0.0	0.0	0.0	0.0	0.0	0.0	0.0	0.0	0.0	0.0	0.0
Y(420)	0.0		0.0	0.0	0.0	0.0	0.0	0.0	0.0	0.0	0.0	0.0	0.0	0.0	0.0	0.0	0.0	0.0	0.0	0.0	0.0	0.0
A(375)	0.0		0.0	0.0	0.0	0.0	0.0	0.0	0.0	0.0	0.0	0.0	0.0	0.0	0.0	0.0	0.0	0.0	0.0	0.0	0.0	0.0
L(387)	0.0		0.0	0.0	0.0	0.0	0.0	0.0	0.0	0.0	0.0	0.0	0.0	0.0	0.0	0.0	0.0	0.0	0.0	0.0	0.0	0.0
C(395)	0.0		0.0	0.0	0.0	0.0	0.0	0.0	0.0	0.0	0.0	0.0	0.0	0.0	0.0	0.0	0.0	0.0	0.0	0.0	0.0	0.0
D(711)	0.0		0.0	0.0	0.0	0.0	0.0	0.0	0.0	0.0	0.0	0.0	0.0	0.0	0.0	0.0	0.0	0.0	0.0	0.0	0.0	0.0
R(392)	0.0		0.0	0.0	0.0	0.0	0.0	0.0	0.0	0.0	0.0	0.0	0.0	0.0	0.0	0.0	0.0	0.0	0.0	0.0	0.0	0.0
N(713)	0.0		0.0	0.0	0.0	0.0	0.0	0.0	0.0	0.0	0.0	0.0	0.0	0.0	0.0	0.0	0.0	0.0	0.0	0.0	0.0	0.0
D(390)	0.0		0.0	0.0	0.0	0.0	0.0	0.0	0.0	0.0	0.0	0.0	0.0	0.0	0.0	0.0	0.0	0.0	0.0	0.0	0.0	0.0
K(714)	0.0		0.0	0.0	0.0	0.0	0.0	0.0	0.0	0.0	0.0	0.0	0.0	0.0	0.0	0.0	0.0	0.0	0.0	0.0	0.0	0.0
I(715)	0.0		0.0	0.0	0.0	0.0	0.0	0.0	0.0	0.0	0.0	0.0	0.0	0.0	0.0	0.0	0.0	0.0	0.0	0.0	0.0	0.0
F(419)	0.0		0.0	0.0	0.0	0.0	0.0	0.0	0.0	0.0	0.0	0.0	0.0	0.0	0.0	0.0	0.0	0.0	0.0	0.0	0.0	0.0
S(384)	0.0		0.0	0.0	0.0	0.0	0.0	0.0	0.0	0.0	0.0	0.0	0.0	0.0	0.0	0.0	0.0	0.0	0.0	0.0	0.0	0.0
H(381)	0.0		0.0	0.0	0.0	0.0	0.0	0.0	0.0	0.0	0.0	0.0	0.0	0.0	0.0	0.0	0.0	0.0	0.0	0.0	0.0	0.0
L(723)	0.0		0.0	0.0	0.0	0.0	0.0	0.0	0.0	0.0	0.0	0.0	0.0	0.0	0.0	0.0	0.0	0.0	0.0	0.0	0.0	0.0
P(378)	0.0		0.0	0.0	0.0	0.0	0.0	0.0	0.0	0.0	0.0	0.0	0.0	0.0	0.0	0.0	0.0	0.0	0.0	0.0	0.0	0.0
D(377)	0.0		0.0	0.0	0.0	0.0	0.0	0.0	0.0	0.0	0.0	0.0	0.0	0.0	0.0	0.0	0.0	0.0	0.0	0.0	0.0	0.0
A(376)	0.0		0.0	0.0	0.0	0.0	0.0	0.0	0.0	0.0	0.0	0.0	0.0	0.0	0.0	0.0	0.0	0.0	0.0	0.0	0.0	0.0
F(396)	0.0		0.0	0.0	0.0	0.0	0.0	0.0	0.0	0.0	0.0	0.0	0.0	0.0	0.0	0.0	0.0	0.0	0.0	0.0	0.0	0.0
S(397)	0.0		0.0	0.0	0.0	0.0	0.0	0.0	0.0	0.0	0.0	0.0	0.0	0.0	0.0	0.0	0.0	0.0	0.0	0.0	0.0	0.0
S(709)	0.0		0.0	0.0	0.0	0.0	0.0	0.0	0.0	0.0	0.0	0.0	0.0	0.0	0.0	0.0	0.0	0.0	0.0	0.0	0.0	0.0
L(401)	0.0		0.0	0.0	0.0	0.0	0.0	0.0	0.0	0.0	0.0	0.0	0.0	0.0	0.0	0.0	0.0	0.0	0.0	0.0	0.0	0.0
N(403)	0.0		0.0	0.0	0.0	0.0	0.0	0.0	0.0	0.0	0.0	0.0	0.0	0.0	0.0	0.0	0.0	0.0	0.0	0.0	0.0	0.0
N(404)	0.0		0.0	0.0	0.0	0.0	0.0	0.0	0.0	0.0	0.0	0.0	0.0	0.0	0.0	0.0	0.0	0.0	0.0	0.0	0.0	0.0
F(407)	0.0		0.0	0.0	0.0	0.0	0.0	0.0	0.0	0.0	0.0	0.0	0.0	0.0	0.0	0.0	0.0	0.0	0.0	0.0	0.0	0.0
Q(408)	0.0		0.0	0.0	0.0	0.0	0.0	0.0	0.0	0.0	0.0	0.0	0.0	0.0	0.0	0.0	0.0	0.0	0.0	0.0	0.0	0.0
T(409)	0.0		0.0	0.0	0.0	0.0	0.0	0.0	0.0	0.0	0.0	0.0	0.0	0.0	0.0	0.0	0.0	0.0	0.0	0.0	0.0	0.0
K(411)	0.0		0.0	0.0	0.0	0.0	0.0	0.0	0.0	0.0	0.0	0.0	0.0	0.0	0.0	0.0	0.0	0.0	0.0	0.0	0.0	0.0
N(703)	0.0		0.0	0.0	0.0	0.0	0.0	0.0	0.0	0.0	0.0	0.0	0.0	0.0	0.0	0.0	0.0	0.0	0.0	0.0	0.0	0.0
G(413)	0.0		0.0	0.0	0.0	0.0	0.0	0.0	0.0	0.0	0.0	0.0	0.0	0.0	0.0	0.0	0.0	0.0	0.0	0.0	0.0	0.0
N(414)	0.0		0.0	0.0	0.0	0.0	0.0	0.0	0.0	0.0	0.0	0.0	0.0	0.0	0.0	0.0	0.0	0.0	0.0	0.0	0.0	0.0
F(415)	0.0		0.0	0.0	0.0	0.0	0.0	0.0	0.0	0.0	0.0	0.0	0.0	0.0	0.0	0.0	0.0	0.0	0.0	0.0	0.0	0.0
N(416)	0.0		0.0	0.0	0.0	0.0	0.0	0.0	0.0	0.0	0.0	0.0	0.0	0.0	0.0	0.0	0.0	0.0	0.0	0.0	0.0	0.0
K(417)	0.0		0.0	0.0	0.0	0.0	0.0	0.0	0.0	0.0	0.0	0.0	0.0	0.0	0.0	0.0	0.0	0.0	0.0	0.0	0.0	0.0
A(702)	0.0		0.0	0.0	0.0	0.0	0.0	0.0	0.0	0.0	0.0	0.0	0.0	0.0	0.0	0.0	0.0	0.0	0.0	0.0	0.0	0.0
F(317)	0.0		0.0	0.0	0.0	0.0	0.0	0.0	0.0	0.0	0.0	0.0	0.0	0.0	0.0	0.0	0.0	0.0	0.0	0.0	0.0	0.0

## Sheet: Sheet2
Sequence Count
25130
